# Supplementary material
Source: publisher figshare collection journal article supplement (https://geolsoc.figshare.com/ndownloader/files/27173754)
Supplement: Supplementary file 1 [file 27173754]

1_MIN_Aspect	2_MAX_Aspect	3_RANGE_Aspect	4_MEAN_Aspect	5_STD_Aspect	6_SUM_Aspect	7_MIN_PlanCurv	8_MAX_PlanCurv	9_RANGE_PlanCurv	10_MEAN_PlanCurv	11_STD_Plan_Curv	12_SUM_PlanCurv	13_MIN_Curv	14_MAX_Curv	15_RANGE_Curv	16_MEAN_Curv	17_STD_Curv	18_SUM_Curv	19_MIN_Elev	20_MAX_Elev	21_RANGE_Elev	22_MEAN_Elev	23_STD_Elev	24_SUM_Elev	25_MIN_Rough125	26_MAX_Rough125	27_RANGE_Rough125	28_MEAN_Rough125	29_STD_Rough125	30_SUM_Rough125	31_MIN_Slope	32_MAX_Slope	33_RANGE_Slope	34_MEAN_Slope	35_STD_Slope	36_SUM_Slope	Predictor
147.9082031	191.755127	43.84692383	172.2889962	12.14592849	120946.8754	-0.661071301	0.629445851	1.290517151	-0.045489652	0.173147077	-31.933736	-0.958007813	1.16015625	2.118164063	-0.104016339	0.352367822	-73.01947021	969.4533081	1062.549927	93.09661865	1014.773209	22.18927556	712370.793	0.370751083	0.593325973	0.22257489	0.477906777	0.050007753	335.4905576	8.80	26.23	17.42	18.05	4.46	12669.39	1
0.16602248	359.9543457	359.7883232	274.0076814	131.5714463	193449.423	-0.586940825	0.393855542	0.980796367	-0.148241172	0.122483209	-104.6582672	-0.967285156	0.464599609	1.431884766	-0.279270594	0.232701476	-197.1650391	1042.817993	1169.258911	126.440918	1096.976473	33.59482955	774465.39	0.359231293	0.649873435	0.290642142	0.47412472	0.063043923	334.7320522	12.18	33.39	21.20	24.29	6.62	17147.78	1
209.542038	277.0033875	67.46134949	246.5437345	20.70079228	172827.1579	-0.798203766	0.519626915	1.317830682	-0.081232693	0.287808071	-56.94411758	-1.31439209	0.837280273	2.151672363	-0.031342641	0.384537958	-21.97119141	929.4257202	1040.215088	110.7893677	993.8477797	27.70275111	696687.2936	0.479976684	0.630676746	0.150700063	0.560969754	0.032535961	393.2397973	15.37	29.24	13.87	20.78	3.13	14564.00	1
119.6641693	274.9555054	155.2913361	234.903254	26.68325337	165371.8908	-0.692254245	1.098980188	1.791234434	0.031844422	0.34600854	22.41847299	-0.859863281	1.021972656	1.881835938	0.139316212	0.380510236	98.07861328	1083.163086	1208.672607	125.5095215	1153.794611	28.60626043	812271.406	0.421813279	0.636221588	0.214408308	0.533020061	0.052673766	375.2461229	2.35	29.92	27.57	20.92	4.00	14726.97	1
112.6860809	138.1458282	25.45974731	125.7105091	4.53844627	87997.35637	-0.314543813	0.438714713	0.753258526	-0.000489764	0.10693449	-0.342834639	-0.372436523	0.83770752	1.210144043	0.066158622	0.219144144	46.31103516	1016.699219	1121.201904	104.5026855	1071.36237	25.07813543	749953.6589	0.414099306	0.615487039	0.201387733	0.524987389	0.047046543	367.4911724	13.99	29.24	15.24	19.57	2.96	13699.73	1
35.08496475	208.2703857	173.185421	147.1368325	61.82172577	104614.2879	-1.809109449	0.456703216	2.265812665	-0.139133666	0.375352258	-98.92403633	-2.467712402	1.231140137	3.698852539	-0.252976387	0.795295688	-179.8662109	937.7316895	1050.186401	112.4547119	988.3172223	28.61448071	702693.545	0.412146151	0.631118476	0.218972325	0.528960159	0.047939067	376.0906732	4.81	39.34	34.53	22.96	7.85	16321.42	1
0.018579641	359.9949341	359.9763544	156.0303309	163.5897349	109689.3226	-0.781594992	0.534555852	1.316150844	-0.058886379	0.212097143	-41.39712445	-1.088500977	1.188720703	2.27722168	-0.000817767	0.316990663	-0.574890137	1008.462952	1095.274902	86.81195068	1059.932074	22.80683524	745132.2482	0.422856182	0.66780144	0.244945258	0.566183511	0.049009105	398.0270085	9.62	25.17	15.55	17.23	4.21	12112.08	1
19.01086426	345.6493225	326.6384583	171.5568082	74.29239939	121462.2202	-1.330227971	0.899416864	2.229644835	0.095036203	0.274340079	67.28563149	-1.787536621	1.087036133	2.874572754	-0.154011699	0.702784771	-109.0402832	933.3427734	1020.233582	86.89080811	964.6164116	22.48351329	682948.4194	0.318329275	0.640367031	0.322037756	0.430109566	0.07787975	304.5175726	1.17	34.00	32.83	19.85	7.42	14054.14	1
221.7613373	335.9032593	114.141922	288.3783847	26.95286446	203595.1396	-0.675181687	0.115057953	0.79023964	-0.239085456	0.125233023	-168.794332	-1.214477539	0.463134766	1.677612305	-0.392322227	0.307113763	-276.9794922	999.1813354	1127.801147	128.619812	1055.854604	32.9681581	745433.3508	0.410409838	0.670327544	0.259917706	0.484963498	0.058170654	342.3842292	11.90	34.41	22.51	24.36	7.37	17201.04	1
18.41511917	356.6586304	338.2435112	176.1433401	39.11501158	124357.1981	-1.089638948	1.2296381	2.319277048	-0.102997153	0.348069189	-72.71599002	-1.409057617	1.309326172	2.718383789	-0.009471861	0.575354704	-6.687133789	1084.064331	1186.951538	102.887207	1142.670199	25.15730206	806725.1603	0.391287088	0.653798521	0.262511432	0.541488063	0.054776732	382.2905727	1.12	27.61	26.49	19.23	4.98	13576.20	1
63.64611435	188.0719299	124.4258156	131.7368976	45.93572173	93006.24972	-1.360171914	0.851167977	2.211339891	-0.158077412	0.463895186	-111.602653	-1.929931641	0.984436035	2.914367676	-0.217369706	0.629545021	-153.4630127	952.4516602	1047.006958	94.55529785	1003.878422	26.34357742	708738.1659	0.331601351	0.675839186	0.344237834	0.511521242	0.088028247	361.133997	8.44	32.28	23.84	23.38	5.26	16508.22	1
73.27641296	215.4527283	142.1763153	132.2496001	48.82194321	93103.71846	-1.899943233	0.309904575	2.209847808	-0.333541951	0.397807861	-234.8135338	-2.277404785	0.704467773	2.981872559	-0.314657298	0.633013713	-221.5187378	881.0882568	992.4428711	111.3546143	947.7842276	29.37240129	667240.0963	0.412826747	0.664623737	0.251796991	0.577499801	0.052769671	406.5598601	10.00	34.11	24.11	25.19	4.23	17730.44	1
0.072740167	359.9618225	359.8890823	186.5226961	164.4934159	131871.5461	-0.587351024	0.618470788	1.205821812	-0.105605665	0.210882986	-74.6632055	-0.926757813	0.808959961	1.735717773	-0.059877129	0.323146744	-42.33312988	1010.001221	1103.597778	93.59655762	1062.87499	25.21831756	751452.6182	0.467843562	0.707867026	0.240023464	0.569896862	0.047361353	402.9170812	10.97	25.28	14.31	18.40	3.74	13010.52	1
0.752547622	358.6756287	357.923081	62.22751615	33.21487664	43932.6264	-1.004960895	0.360150933	1.365111828	-0.226406854	0.291720594	-159.8432386	-1.559753418	0.783325195	2.343078613	-0.219151829	0.450110573	-154.7211914	1018.045532	1116.342651	98.29711914	1074.940872	25.78373211	758908.2554	0.434291929	0.647242844	0.212950915	0.5576258	0.042644421	393.683815	10.44	28.29	17.85	18.28	4.65	12904.49	1
0.14905259	359.2851257	359.1360731	55.41408608	51.88541062	38845.27435	-1.224914432	0.550837815	1.775752246	0.007322864	0.320217658	5.13332749	-1.38104248	0.893432617	2.274475098	-0.044630717	0.454262876	-31.28613281	962.5875244	1072.814941	110.227417	1012.120057	28.51992267	709496.1597	0.369869143	0.592223108	0.222353965	0.492469407	0.040778432	345.2210543	8.72	26.63	17.91	20.03	3.84	14041.61	1
61.86736679	171.6515808	109.784214	128.0661656	25.68209396	90158.58062	-1.19103694	0.883466899	2.074503839	-0.232041479	0.431694815	-163.3572009	-1.866943359	1.089233398	2.956176758	-0.260286071	0.583664989	-183.241394	991.7684326	1144.574341	152.8059082	1069.343166	39.97765932	752817.5889	0.428520501	0.613933325	0.185412824	0.527905166	0.049319706	371.6452367	12.26	37.58	25.32	28.00	4.02	19714.03	1
117.2895813	197.319458	80.02987671	135.5264349	15.19201712	95004.03085	-0.996758819	0.853255987	1.850014806	-0.024188865	0.375144794	-16.95639421	-1.37310791	0.969848633	2.342956543	-0.080911024	0.490583939	-56.71862793	986.9387817	1126.973633	140.0348511	1050.177984	36.09318461	736174.7669	0.38377279	0.580569029	0.196796238	0.478176589	0.041330604	335.2017891	13.23	34.03	20.80	25.49	4.24	17868.10	1
65.60800934	112.1232986	46.51528931	88.3911022	10.0457275	62138.94485	-0.882404447	0.966322839	1.848727286	-0.03220661	0.258370692	-22.64124704	-1.370300293	1.074645996	2.444946289	0.053793852	0.357763776	37.81707764	994.7237549	1129.773682	135.0499268	1072.312571	34.69704251	753835.7372	0.403657198	0.647921503	0.244264305	0.538940725	0.057399083	378.8753294	15.07	32.50	17.44	24.39	4.82	17143.17	1
92.38748169	241.8876953	149.5002136	156.8115969	47.77667886	110865.799	-1.111105084	0.336084217	1.447189301	-0.307067922	0.309599693	-217.0970206	-1.575866699	0.78326416	2.359130859	-0.401235017	0.467964942	-283.6731567	954.3087769	1060.838135	106.5293579	1009.865701	26.81883687	713975.0509	0.38857168	0.597730875	0.209159195	0.505169108	0.039688946	357.1545596	7.47	31.72	24.25	23.35	4.15	16510.83	1
88.92633057	123.3776398	34.4513092	100.5762372	6.737908953	70805.67102	-0.613945663	0.534704268	1.148649931	0.011166949	0.166511175	7.861532425	-0.807678223	0.633850098	1.44152832	-0.028084408	0.227492717	-19.77142334	1002.499023	1142.617798	140.1187744	1068.731933	35.04188922	752387.2808	0.44120118	0.576300204	0.135099024	0.499973624	0.030138061	351.9814316	21.41	32.78	11.37	25.35	1.80	17844.85	1
36.88076019	132.65271	95.77194977	88.52645572	28.89248303	62234.09837	-0.706121981	0.144393384	0.850515366	-0.232887	0.184802039	-163.7195611	-0.94354248	0.440063477	1.383605957	-0.291915438	0.28292833	-205.2165527	978.576355	1089.719849	111.1434937	1039.326921	29.02236855	730646.8253	0.44411689	0.62835741	0.18424052	0.526121223	0.035619259	369.8632195	14.75	31.15	16.40	22.90	3.38	16097.86	1
97.82427979	224.9409485	127.1166687	147.1778861	40.31572812	103024.5203	-1.208496213	0.310911894	1.519408107	-0.298717476	0.269668921	-209.1022333	-1.363769531	0.648071289	2.01184082	-0.347573678	0.431578364	-243.3015747	934.0484619	1052.379517	118.3310547	998.1899214	28.80833545	698732.945	0.455585957	0.624408305	0.168822348	0.52645087	0.03782445	368.5156093	15.68	31.67	15.99	24.52	4.23	17166.05	1
0.085270546	359.9910889	359.9058183	168.8497896	154.5162664	118363.7025	-0.70033443	0.523483574	1.223818004	-0.235842515	0.21154736	-165.3256027	-0.868530273	0.969848633	1.838378906	-0.299310311	0.329901932	-209.8165283	1017.767761	1138.501221	120.7334595	1075.85703	28.93153453	754175.7781	0.435313731	0.576909602	0.14159587	0.50073297	0.02390691	351.0138119	15.58	30.23	14.64	23.09	3.25	16189.51	1
109.5783081	227.3664703	117.7881622	152.2822316	36.84551621	107663.5377	-1.217720866	0.603947997	1.821668863	-0.164641387	0.396940904	-116.4014605	-1.44342041	0.741882324	2.185302734	-0.272545368	0.514104589	-192.6895752	932.3300781	1057.749756	125.4196777	990.8497053	29.50537222	700530.7416	0.415158242	0.592675626	0.177517384	0.494437009	0.041219565	349.5669651	12.74	32.82	20.08	24.39	4.32	17241.57	1
0.136839554	359.6655579	359.5287183	122.0881326	118.2311015	86194.22158	-0.983252823	0.367620796	1.350873619	-0.240592672	0.276122581	-169.8584267	-1.32421875	0.481994629	1.806213379	-0.26481676	0.44779593	-186.9606323	899.4613647	981.3635864	81.90222168	944.2425518	21.83723614	666635.2416	0.452305079	0.680006325	0.227701247	0.547308368	0.047511956	386.3997075	8.16	26.05	17.89	20.41	3.94	14407.84	1
178.2697906	224.7359161	46.46612549	198.6700526	9.400657852	139267.7069	-0.403229296	0.330441713	0.73367101	-0.103328543	0.116511637	-72.43330888	-0.8203125	0.824157715	1.644470215	-0.098308569	0.321098206	-68.91430664	1021.739197	1153.882813	132.1436157	1092.021397	33.42939579	765506.9992	0.482678145	0.602745175	0.12006703	0.540680252	0.022997969	379.016857	17.29	31.77	14.47	23.81	3.79	16688.68	1
91.24419403	250.0644073	158.8202133	123.326856	46.21555722	87192.08717	-0.956412077	0.238264143	1.19467622	-0.082234746	0.181698514	-58.13996556	-1.117126465	0.495727539	1.612854004	-0.28465571	0.369921114	-201.2515869	989.3856812	1095.478638	106.0929565	1029.537766	28.59695834	727883.2006	0.298673004	0.573452294	0.27477929	0.417338254	0.071555569	295.0581459	4.78	30.42	25.63	20.30	8.08	14350.20	1
242.2619171	311.8727112	69.61079407	272.4148923	19.08901682	190962.8395	-0.685839295	0.367212951	1.053052247	-0.14528005	0.217620581	-101.841315	-0.993286133	0.638549805	1.631835938	-0.173020127	0.297518578	-121.2871094	1059.883301	1186.392944	126.5096436	1127.082208	33.90846656	790084.6278	0.441581637	0.605886161	0.164304525	0.519128972	0.030901373	363.9094092	19.78	32.79	13.01	25.30	2.36	17735.16	1
0.1022949	359.8872681	359.7849732	306.9709212	88.94504781	215186.6158	-0.716979861	0.673898458	1.39087832	0.036054725	0.274934998	25.27436251	-0.794250488	0.975891113	1.770141602	0.019147016	0.386065094	13.42205811	889.7922974	1002.95636	113.1640625	947.9899268	31.59557592	664540.9387	0.279861391	0.608597636	0.328736246	0.473116288	0.074629832	331.6545179	14.39	37.16	22.76	23.47	4.57	16451.23	1
121.0494385	285.9502258	164.9007874	180.1995234	39.22959527	126680.2649	-1.424361944	0.623691916	2.048053861	-0.26347637	0.354817411	-185.2238881	-1.824279785	1.130615234	2.95489502	-0.414092887	0.562090802	-291.1072998	985.7984009	1079.975098	94.17669678	1037.504295	21.38918751	729365.5195	0.386391163	0.629974306	0.243583143	0.513828439	0.068271314	361.2213924	9.99	33.15	23.16	19.55	5.16	13743.62	1
0.111589156	359.6687622	359.5571731	157.4803053	149.6020114	111338.5758	-0.877272725	0.219194517	1.096467242	-0.230548777	0.214936156	-162.9979852	-1.334228516	0.776489258	2.110717773	-0.280356832	0.413222378	-198.2122803	1132.393555	1242.161987	109.7684326	1191.613132	27.44853256	842470.4843	0.45393905	0.698558331	0.24461928	0.544956711	0.049500399	385.2843949	9.60	32.89	23.29	21.61	5.07	15278.49	1
25.93563271	288.2578735	262.3222408	238.1732671	37.16082077	168388.4999	-0.280157715	1.207105756	1.487263471	0.075035867	0.155428769	53.05035787	-0.440185547	1.541137695	1.981323242	0.251775976	0.441631762	178.0056152	1121.190674	1246.269897	125.0792236	1191.891742	35.48015168	842667.4618	0.433174968	0.716011286	0.282836318	0.542445331	0.071265667	383.5088488	0.87	27.87	27.00	23.84	5.73	16857.08	1
302.4872437	348.2031555	45.71591187	313.2883506	5.510774974	219928.4221	-0.261992097	0.349978358	0.611970454	0.021199981	0.095435213	14.88238638	-0.567260742	0.682006836	1.249267578	0.134948209	0.241080324	94.73364258	1096.098633	1188.014893	91.91625977	1148.304651	23.29231699	806109.8647	0.476604193	0.730479836	0.253875643	0.572486472	0.05922161	401.8855034	4.24	26.56	22.32	17.39	3.88	12205.85	1
149.7518311	291.2453613	141.4935303	218.3715808	36.75603401	153515.2213	-1.114161134	0.503075302	1.617236435	-0.156537226	0.297552348	-110.0456701	-1.560058594	0.668823242	2.228881836	-0.10001535	0.476012558	-70.31079102	1083.356689	1161.59729	78.24060059	1130.248487	20.50053565	794564.6866	0.439118028	0.744057953	0.304939926	0.615043886	0.064414909	432.375852	4.13	26.26	22.13	15.69	5.33	11029.17	1
32.05499649	219.8624115	187.807415	135.9716749	50.67321617	95724.05915	-1.111119509	0.542480826	1.653600335	-0.209837188	0.30903035	-147.7253804	-1.330078125	0.519287109	1.849365234	-0.381541946	0.405609416	-268.6055298	1018.01062	1105.061523	87.05090332	1057.007918	22.10882142	744133.5742	0.278643668	0.592313409	0.313669741	0.447625966	0.077642526	315.1286798	3.80	32.99	29.20	20.39	5.87	14352.59	1
0.476560742	359.7978516	359.3212908	204.8188823	143.6947439	143373.2176	-1.37226367	0.296312004	1.668575674	-0.261295515	0.279851634	-182.9068607	-1.846313477	0.651855469	2.498168945	-0.291110317	0.422026115	-203.7772217	1047.872559	1145.123291	97.25073242	1104.066081	23.86830915	772846.257	0.456404805	0.637036324	0.180631518	0.557383745	0.032877108	390.1686212	11.23	30.00	18.77	20.10	3.31	14069.12	1
224.7163696	305.8433533	81.12698364	284.913509	13.10192695	201148.9374	-0.865627944	0.516197443	1.381825387	-0.046893811	0.186486531	-33.10703085	-1.323974609	0.977661133	2.301635742	-0.028669579	0.406777401	-20.24072266	1044.53772	1149.966553	105.428833	1102.123906	27.65919646	778099.4775	0.392289251	0.711406946	0.319117695	0.544652217	0.069491329	384.5244652	4.69	30.13	25.43	20.01	3.68	14124.56	1
0.77382344	359.2052002	358.4313768	90.88164605	75.83055562	63889.79717	-1.28243947	0.396020055	1.678459525	-0.226668211	0.296404468	-159.3477524	-1.656738281	0.82409668	2.480834961	-0.155555779	0.456186734	-109.3557129	1028.656128	1136.915405	108.2592773	1092.656064	28.62152583	768137.2133	0.427360177	0.70535326	0.277993083	0.584753838	0.055692412	411.081948	8.32	28.50	20.18	20.94	4.33	14722.55	1
28.35462379	70.90402985	42.54940605	56.69188611	8.790536578	40024.47159	-0.22922489	0.5023368	0.731561691	0.030815939	0.113723594	21.75605322	-0.416015625	1.213012695	1.62902832	0.141648938	0.289656986	100.0041504	1045.779785	1139.26123	93.48144531	1104.064082	24.91640381	779469.2416	0.378914028	0.70456183	0.325647801	0.566161407	0.074185483	399.709953	2.42	29.74	27.31	17.66	7.12	12467.56	1
0.074959025	359.938385	359.863426	57.02501233	77.41175644	39917.50863	-0.867077112	0.48802036	1.355097473	-0.00796313	0.223899413	-5.57419123	-1.251342773	0.698852539	1.950195313	-0.0482387	0.374022923	-33.76708984	1006.201721	1126.08606	119.8843384	1064.790081	30.08407305	745353.0565	0.3507469	0.615175962	0.264429063	0.486954453	0.052982238	340.8681171	10.54	30.09	19.55	21.32	4.67	14924.04	1
0.219817311	359.8829041	359.6630867	99.33264857	103.5979712	70128.84989	-0.869978249	0.6491611	1.519139349	-0.134948976	0.31099409	-95.27397716	-1.219848633	1.069702148	2.289550781	-0.08569699	0.439409883	-60.5020752	1039.503906	1142.119995	102.6160889	1099.376117	26.05019279	776159.5383	0.385257572	0.740682602	0.35542503	0.563005977	0.079608904	397.4822198	8.12	27.89	19.77	20.51	3.46	14476.93	1
167.8005066	233.5627441	65.76223755	193.3944186	16.62472428	136536.4595	-0.657411098	0.732319355	1.389730453	0.065972428	0.266773851	46.57653403	-0.871765137	1.080871582	1.952636719	0.090701614	0.389086193	64.03533936	933.9421387	1019.252441	85.31030273	978.0300529	20.61553194	690489.2173	0.307263583	0.612034976	0.304771394	0.493901011	0.058633582	348.6941141	11.65	28.27	16.62	16.89	3.50	11923.94	1
0.049335428	359.8660583	359.8167229	78.09670193	62.59468699	55058.17486	-1.110609174	0.239582568	1.350191742	-0.280761518	0.28723407	-197.9368702	-1.330200195	0.694335938	2.024536133	-0.273050857	0.48923472	-192.5008545	1011.178467	1108.266479	97.0880127	1065.75406	25.62472287	751356.612	0.426524431	0.685058594	0.258534163	0.554512595	0.05225723	390.9313797	10.52	29.63	19.11	21.19	4.66	14937.89	1
81.10607147	163.5322723	82.42620087	120.4665356	19.90310264	84206.10841	-0.556765616	0.011218477	0.567984093	-0.143432325	0.080043653	-100.2591952	-0.770629883	0.309692383	1.080322266	-0.194272981	0.21402674	-135.796814	995.6296387	1090.268188	94.6385498	1046.377656	22.70490632	731417.9818	0.457349747	0.610099137	0.152749389	0.527503859	0.037354541	368.7251977	13.76	24.39	10.63	18.01	2.86	12591.75	1
2.643929958	358.2007751	355.5568452	179.3226619	74.61538169	126601.7993	-0.827971816	0.447191119	1.275162935	-0.009254067	0.134994871	-6.533371614	-1.274353027	0.547668457	1.822021484	-0.259034241	0.447575447	-182.8781738	829.62146	909.3227539	79.70129395	857.9827541	23.44972081	605735.8244	0.312012881	0.509743214	0.197730333	0.409893982	0.061076903	289.3851514	0.40	29.07	28.67	17.79	6.84	12563.16	1
0.104913734	359.6220093	359.5170955	122.4834044	132.7196484	86718.25032	-1.013743758	0.16807203	1.181815788	-0.272918204	0.224152045	-193.2260884	-1.269165039	0.661499023	1.930664063	-0.285210216	0.38067092	-201.928833	1047.607178	1163.631836	116.0246582	1109.880556	29.52635415	785795.4333	0.450137049	0.608663201	0.158526152	0.542515367	0.03895764	384.1008796	13.37	30.78	17.41	23.68	3.89	16767.47	1
83.25273132	197.7448425	114.4921112	124.5333793	27.8993812	87422.43226	-1.152570724	0.783571422	1.936142147	-0.200623518	0.359123021	-140.8377099	-1.340026855	0.900634766	2.240661621	-0.200454668	0.474869862	-140.7191772	933.1891479	1042.208008	109.0188599	991.0388631	27.2298091	695709.2819	0.43883273	0.632649779	0.193817049	0.543560601	0.045485419	381.5795422	14.62	26.95	12.33	20.94	2.61	14698.88	1
166.1472931	202.6856842	36.53839111	188.5796742	7.521892959	133137.25	-0.642256498	0.384789616	1.027046114	-0.019818931	0.192657233	-13.99216558	-0.62677002	0.67388916	1.30065918	0.057378061	0.259527145	40.50891113	867.3210449	1031.734253	164.413208	957.1687714	41.15982129	675761.1526	0.422930092	0.584870219	0.161940128	0.523573717	0.023935282	369.6430444	20.33	36.15	15.82	28.53	3.65	20142.87	1
47.45948029	148.6224823	101.163002	113.331456	25.83812136	79672.01359	-0.716504157	0.409758478	1.126262635	-0.16391046	0.171297916	-115.2290532	-0.89465332	0.691650391	1.586303711	-0.227024561	0.263994087	-159.5982666	1019.02179	1112.523926	93.50213623	1065.663026	21.67352874	749161.1069	0.425012052	0.653986454	0.228974402	0.523816449	0.050643193	368.2429636	11.99	26.58	14.59	18.23	3.26	12815.33	1
176.4553833	239.5028839	63.04750061	199.6341801	14.34930091	139743.9261	-1.083116055	0.499350399	1.582466453	-0.109994918	0.229677597	-76.9964423	-1.539001465	0.984375	2.523376465	-0.083032139	0.37203772	-58.12249756	1009.278137	1109.818359	100.5402222	1067.615088	23.45281101	747330.5613	0.433823645	0.648188353	0.214364707	0.559242045	0.048180825	391.4694317	11.81	30.43	18.62	18.40	4.11	12881.75	1
128.089386	197.2506714	69.1612854	155.0256691	10.77380966	109758.1737	-0.902379096	0.318700016	1.221079111	-0.075516446	0.170170115	-53.4656437	-1.089538574	0.700805664	1.790344238	-0.007724309	0.274352426	-5.468811035	1010.281555	1115.748657	105.4671021	1073.83054	25.5677841	760272.0225	0.482235491	0.737857521	0.255622029	0.577025211	0.046349031	408.5338497	11.18	27.24	16.05	18.70	4.33	13242.39	1
41.12640381	125.6922989	84.56589508	90.21611054	21.35216952	63331.7096	-0.542871118	0.407766432	0.950637549	-0.101631971	0.173014564	-71.34564381	-1.210083008	0.630004883	1.840087891	-0.109250669	0.293074875	-76.69396973	1008.680298	1105.001709	96.32141113	1060.563549	22.71555362	744515.6113	0.42701894	0.622517765	0.195498824	0.528591034	0.040313094	371.0709059	9.77	25.50	15.73	17.57	3.21	12332.56	1
8.929899216	84.86408997	75.93419075	45.03365141	22.49409976	31883.8252	-1.188581705	0.527566969	1.716148674	-0.148088751	0.276500026	-104.8468357	-1.434204102	0.703491211	2.137695313	-0.164032845	0.36193963	-116.1352539	987.8221436	1111.63269	123.8105469	1058.957665	30.23190239	749742.0268	0.426950634	0.653235257	0.226284623	0.538520028	0.043342115	381.2721798	18.77	29.20	10.43	23.06	2.27	16327.39	1
39.7249794	114.2298126	74.50483322	62.03181775	16.84928623	43546.33606	-0.377194256	0.788163841	1.165358096	0.13119422	0.20362916	92.09834265	-0.633300781	1.03515625	1.668457031	0.18879052	0.277783311	132.5309448	963.6356812	1104.016113	140.3804321	1038.938764	33.68401765	729335.0125	0.365210503	0.569010973	0.20380047	0.499568712	0.039797924	350.6972361	15.93	31.98	16.05	24.40	4.03	17131.34	1
1.127136111	359.0834045	357.9562684	88.3160273	52.7798225	61997.85116	-0.824662685	0.398946196	1.223608881	-0.211405013	0.234023727	-148.4063191	-1.214233398	0.635864258	1.850097656	-0.255300842	0.33528056	-179.2211914	1035.123291	1132.350098	97.22680664	1086.87316	24.75567652	762984.9586	0.471034467	0.63692677	0.165892303	0.539595162	0.035155737	378.7958034	8.82	26.39	17.57	19.77	3.18	13878.08	1
63.31172943	194.1743469	130.8626175	105.8193369	31.68165155	74814.27119	-1.223462939	0.495547891	1.71901083	-0.231800488	0.312044209	-163.8829452	-1.754150391	0.991699219	2.745849609	-0.259549283	0.47342814	-183.5013428	1049.790527	1149.071899	99.28137207	1104.564476	25.63925383	780927.0846	0.473124027	0.67062974	0.197505713	0.562211459	0.047137348	397.4835016	8.84	27.72	18.88	20.09	3.44	14203.71	1
32.24237442	155.440567	123.1981926	96.8806141	31.01582638	68300.83294	-0.709013343	0.439736754	1.148750097	-0.171503431	0.229005828	-120.9099189	-1.180297852	0.726074219	1.90637207	-0.161774158	0.365117467	-114.0507813	1059.325439	1149.34314	90.0177002	1105.787084	22.72728171	779579.8943	0.450155914	0.691236138	0.241080225	0.554904335	0.060451838	391.2075563	11.54	23.66	12.12	17.56	2.87	12380.54	1
0.010958127	359.9782715	359.9673134	149.7123695	162.1603589	105247.7957	-0.904112577	0.467622757	1.371735334	-0.165877275	0.266985734	-116.6117246	-1.218017578	0.7109375	1.928955078	-0.166027085	0.384375141	-116.717041	1046.463745	1161.255249	114.7915039	1104.33177	29.92952399	776345.234	0.444818944	0.656151235	0.211332291	0.542046626	0.045578678	381.058778	15.46	28.23	12.77	22.67	2.74	15934.11	1
94.68405151	217.4736481	122.7895966	168.6082258	25.54163269	119374.6239	-0.700614691	0.559923351	1.260538042	-0.178880815	0.235215681	-126.6476169	-1.077026367	0.975463867	2.052490234	-0.187964833	0.378254946	-133.0791016	1066.452759	1164.494507	98.04174805	1116.590404	24.12342642	790546.0063	0.468905419	0.666936398	0.198030978	0.542992034	0.034491936	384.43836	11.63	25.66	14.03	18.34	3.74	12988.03	1
122.3509903	190.6698914	68.31890106	157.3292038	16.40143195	110602.4303	-0.668352485	0.218157649	0.886510134	-0.132561526	0.158822025	-93.19075305	-1.075195313	0.58984375	1.665039063	-0.17741279	0.351878411	-124.7211914	1068.76062	1183.593628	114.8330078	1130.72633	28.66360142	794900.6097	0.410717964	0.627984703	0.217266738	0.523439426	0.051126101	367.9779166	13.70	29.54	15.84	21.39	4.41	15036.17	1
99.74911499	208.533783	108.784668	146.2096241	31.28622541	102346.7369	-1.296895266	0.557521224	1.85441649	-0.270419696	0.313164653	-189.2937872	-1.689208984	0.812866211	2.502075195	-0.229713832	0.426260123	-160.7996826	1103.376953	1232.871826	129.494873	1180.71488	32.15737971	826500.4158	0.460703582	0.623004019	0.162300438	0.552703027	0.038895839	386.8921187	17.77	30.80	13.04	24.51	3.01	17157.94	1
222.7576599	250.8070679	28.04940796	231.6906019	5.674482284	163805.2556	-0.238074869	0.419663429	0.657738298	0.049145609	0.104554645	34.74594581	-0.545776367	0.942199707	1.487976074	0.038654246	0.278239462	27.32855225	919.0603638	1045.119995	126.0596313	982.0779299	32.59020827	694329.0964	0.386208832	0.543639183	0.157430351	0.486422821	0.030581499	343.9009344	17.46	28.97	11.51	22.93	2.87	16209.02	1
104.3094101	197.6913452	93.38193512	144.3370201	17.34367126	101613.2621	-0.637382448	0.278724134	0.916106582	-0.136069473	0.181702223	-95.79290864	-0.830322266	0.518310547	1.348632813	-0.163321408	0.244688641	-114.9782715	1015.902588	1105.61731	89.71472168	1063.404648	22.14866671	748636.8723	0.420117289	0.611256897	0.191139609	0.526816575	0.042806199	370.8788685	12.76	23.52	10.76	16.90	2.06	11898.26	1
0.353421867	359.9488831	359.5954612	58.79866947	65.20696812	41570.65932	-1.164181352	0.832363486	1.996544838	-0.195958712	0.283643858	-138.5428097	-1.39642334	1.215087891	2.61151123	-0.254157211	0.395820426	-179.6891479	1008.268738	1121.195557	112.9268188	1066.443225	27.10941522	753975.3599	0.439284205	0.636371315	0.197087109	0.526284342	0.047094434	372.0830296	12.35	30.96	18.61	22.50	4.49	15905.26	1
75.0552597	154.2352753	79.18001556	129.9635261	19.52352229	91494.3224	-0.86433363	0.378398806	1.242732435	-0.130600714	0.208848453	-91.94290278	-1.387573242	0.836547852	2.224121094	-0.147606763	0.402349981	-103.9151611	1074.081421	1177.343872	103.2624512	1126.550473	28.79241318	793091.533	0.421335846	0.599066734	0.177730888	0.514595595	0.038102495	362.275299	10.54	31.07	20.53	20.81	4.55	14647.90	1
0.095885172	359.9692993	359.8734141	63.9835355	68.10023943	45108.39253	-1.091005445	0.200332463	1.291337907	-0.306876025	0.268449676	-216.3475979	-1.569946289	0.388183594	1.958129883	-0.404447688	0.403577805	-285.1356201	1024.337769	1147.312866	122.9750977	1085.275459	28.51721332	765119.1989	0.442767084	0.655083358	0.212316275	0.518489748	0.040376955	365.5352723	11.76	33.56	21.80	23.73	4.98	16728.02	1
27.30770302	85.15010834	57.84240532	62.57692241	12.9156265	44241.88414	-0.484060764	0.684767187	1.168827951	0.06952636	0.168257085	49.1551364	-0.758178711	0.983154297	1.741333008	0.106929105	0.255426335	75.59887695	962.5537109	1088.777588	126.223877	1030.119127	30.68998502	728294.2226	0.393548787	0.594170868	0.200622082	0.511521698	0.031161475	361.6458405	16.33	28.73	12.40	22.14	3.11	15651.69	1
286.6111755	312.3455811	25.73440552	301.6281246	5.032276521	213552.7122	-0.455621213	0.37777245	0.833393663	-0.033123295	0.133178995	-23.4512932	-1.387634277	0.836914063	2.22454834	-0.032324753	0.343010976	-22.88592529	975.6309814	1103.554321	127.9233398	1045.015802	29.6734607	739871.1875	0.409391403	0.637192369	0.227800965	0.517046052	0.059709231	366.0686049	13.65	30.86	17.21	22.38	4.90	15847.99	1
60.70672226	167.7488098	107.0420876	127.7030789	33.04161592	90286.0768	-1.269250393	0.52617228	1.795422673	-0.172197515	0.377174053	-121.7436434	-1.600830078	0.654785156	2.255615234	-0.197671375	0.482630547	-139.7536621	1015.7052	1131.2323	115.5270996	1077.792841	28.30997262	761999.5383	0.446669787	0.617912054	0.171242267	0.548072482	0.03932196	387.4872451	13.59	26.18	12.59	22.96	1.78	16234.23	1
125.5722733	232.8643036	107.2920303	198.485257	33.20979327	139733.6209	-0.881472409	0.293832392	1.1753048	-0.173137811	0.222697252	-121.8890192	-1.080078125	0.555541992	1.635620117	-0.207165891	0.314032526	-145.8447876	979.3759766	1068.740234	89.36425781	1028.779483	21.28614285	724260.7562	0.4208377	0.620127261	0.19928956	0.538206505	0.040557149	378.8973795	11.13	24.37	13.24	17.43	2.69	12270.54	1
153.4204712	179.2589569	25.83848572	166.6140894	6.333071675	117796.1612	-0.226162568	0.281455904	0.507618472	0.009609855	0.093371067	6.79416732	-0.756774902	0.795837402	1.552612305	-0.081480207	0.317942415	-57.60650635	800.9697266	895.6260376	94.65631104	845.0195462	25.020648	597428.8192	0.148908511	0.583512425	0.434603915	0.424127727	0.102483606	299.8583029	4.29	26.57	22.28	18.13	4.35	12815.34	1
0.154809609	359.8481445	359.6933349	26.55944457	45.50093337	18750.96787	-0.47107777	0.274221599	0.745299369	-0.016377292	0.13293169	-11.56236825	-0.942016602	0.37298584	1.315002441	-0.059176005	0.221784198	-41.77825928	876.7918701	991.9404907	115.1486206	931.2961873	28.02470791	657495.1082	0.399028897	0.58297801	0.183949113	0.484083371	0.033420214	341.7628599	13.47	27.50	14.03	20.47	3.13	14455.13	1
84.47710419	242.1579285	157.6808243	125.0034691	48.25087316	88252.44917	-0.831708491	0.441479683	1.273188174	-0.085458233	0.194176561	-60.33351238	-1.201416016	1.070495605	2.271911621	-0.312535272	0.359904992	-220.6499023	977.2155151	1071.739014	94.52349854	1010.392115	22.88363895	713336.8333	0.323208779	0.597453237	0.274244457	0.429330817	0.053906898	303.1075571	4.57	31.86	27.29	17.92	8.10	12649.64	1
117.5422745	253.740921	136.1986465	132.0933934	16.24975484	93390.02914	-0.15779525	0.784789026	0.942584276	0.06961048	0.145846749	49.21460934	-0.384033203	1.044311523	1.428344727	0.17886495	0.281624308	126.4575195	961.9852905	1086.267212	124.2819214	1030.477104	32.97327115	728547.3123	0.414308131	0.611003339	0.196695209	0.523178819	0.04141289	369.8874253	4.76	28.01	23.25	22.72	4.86	16060.49	1
143.556839	250.9155121	107.3586731	191.7300358	28.17837245	133827.565	-0.774377346	0.238176331	1.012553677	-0.172261421	0.158704379	-120.238472	-0.916870117	0.602783203	1.51965332	-0.1729286	0.271986173	-120.7041626	1017.792419	1101.314819	83.5223999	1065.320929	19.69715295	743594.0082	0.449828207	0.661517203	0.211688995	0.548449369	0.047258551	382.8176595	10.37	24.80	14.43	16.15	2.81	11273.23	1
164.2796021	258.3045654	94.02496338	199.8013713	26.85082705	141259.5695	-1.215994477	0.752361238	1.968355715	-0.19333856	0.390942525	-136.6903618	-1.634521484	1.278808594	2.913330078	-0.134797394	0.529791638	-95.30175781	950.9876709	1110.611938	159.6242676	1047.468177	37.80822064	740560.0012	0.414976597	0.652387559	0.237410963	0.540332825	0.052018876	382.0153076	20.24	37.85	17.60	28.09	4.68	19861.94	1
0.543849945	359.7897339	359.2458839	41.10666067	72.75220756	28939.08911	-0.679421008	0.23314248	0.912563488	-0.158415589	0.164357235	-111.5245747	-0.892089844	0.542480469	1.434570313	-0.20052355	0.252180968	-141.1685791	1034.27063	1153.129517	118.8588867	1090.824759	28.19044795	767940.6302	0.418417603	0.60473609	0.186318487	0.502190457	0.039283752	353.5420819	14.78	28.58	13.80	20.96	3.02	14756.18	1
54.55417633	143.4365234	88.88234711	106.6876408	26.69610184	75214.78676	-0.692345321	0.232603222	0.924948543	-0.17431156	0.13988307	-122.8896496	-0.960693359	0.46862793	1.429321289	-0.19839404	0.210421925	-139.8677979	1051.699707	1147.838379	96.13867188	1103.211272	24.72386919	777763.947	0.450761408	0.628574312	0.177812904	0.526350993	0.03242755	371.0774503	13.84	22.36	8.52	19.17	2.01	13515.62	1
0.00121919	359.9187012	359.917482	219.1276049	152.7373596	154484.9615	-0.585545957	0.269542247	0.855088204	-0.202049683	0.167956455	-142.4450264	-1.070068359	0.841308594	1.911376953	-0.273091201	0.310671447	-192.5292969	1110.155518	1218.378296	108.2227783	1164.666316	27.93041824	821089.7526	0.436690211	0.666727304	0.230037093	0.516749165	0.052571656	364.3081614	12.36	29.48	17.12	22.22	4.34	15665.56	1
0.141557395	359.8435669	359.7020095	109.214038	122.0647732	76559.04065	-1.270193934	0.473631799	1.743825734	-0.305188803	0.292847124	-213.9373508	-1.464599609	0.727661133	2.192260742	-0.390000892	0.419848456	-273.390625	1068.220337	1192.659668	124.4393311	1130.879243	29.13027867	792746.3491	0.440181404	0.639037848	0.198856443	0.541820211	0.037834272	379.815968	14.32	30.78	16.46	24.43	3.37	17128.38	1
56.60013199	135.5409698	78.94083786	80.38725637	15.13871009	56914.17751	-1.200918674	0.557495534	1.758414209	-0.127496788	0.312457861	-90.26772618	-1.356445313	0.731445313	2.087890625	-0.065998832	0.392533001	-46.72717285	1060.008057	1186.825439	126.8173828	1133.486086	31.8598276	802508.1489	0.425473779	0.650751114	0.225277334	0.54783872	0.055925293	387.8698139	16.43	30.75	14.33	23.38	4.54	16554.91	1
133.8483582	243.2757416	109.4273834	199.6267048	28.11950942	141136.0803	-0.861943305	0.401110649	1.263053954	-0.258882716	0.210228704	-183.03008	-1.306274414	0.859008789	2.165283203	-0.265916449	0.361227759	-188.0029297	1060.932983	1191.112305	130.1793213	1132.931677	33.36271779	800982.6957	0.31456551	0.61046958	0.29590407	0.523237487	0.056162341	369.9289032	12.43	34.85	22.42	24.82	2.61	17546.77	1
80.19642639	131.9655762	51.76914978	113.8290835	11.16505125	80363.33295	-0.451085865	0.791833043	1.242918909	-0.00591435	0.276853762	-4.175530813	-0.987548828	1.321166992	2.30871582	0.017736332	0.40465746	12.52185059	1082.9823	1224.084106	141.1018066	1154.478778	34.50957668	815062.0176	0.390932709	0.660997927	0.270065218	0.507438551	0.05851872	358.2516167	16.90	34.82	17.92	25.48	3.47	17990.30	1
43.09262848	271.4804382	228.3878098	101.4927244	29.71026461	71653.86342	-1.675886989	0.932080925	2.607967913	0.105989634	0.260701263	74.8286819	-1.834228516	1.969360352	3.803588867	-0.036854341	0.887868199	-26.01916504	987.9818726	1116.315308	128.3334351	1044.642485	31.54668222	737517.5946	0.302886128	0.600578964	0.297692835	0.463394547	0.065961091	327.1565499	1.75	35.85	34.10	22.35	10.11	15778.19	1
35.40644073	156.0166779	120.6102371	109.1992688	38.32854485	76985.48448	-0.814181566	0.505656421	1.319837987	-0.233775182	0.27843548	-164.8115031	-1.006835938	0.913818359	1.920654297	-0.312073966	0.401258524	-220.012146	1016.897827	1127.966309	111.0684814	1074.682614	27.34208336	757651.2431	0.421104193	0.571754694	0.150650501	0.506237723	0.026832448	356.8975945	11.32	28.10	16.78	22.78	3.29	16059.63	1
127.27948	260.9058533	133.6263733	200.9429283	33.54243518	141463.8215	-1.241801023	0.151909247	1.393710271	-0.280714546	0.225808319	-197.6230404	-1.752807617	0.742797852	2.495605469	-0.285877921	0.368647876	-201.2580566	1072.171265	1180.664429	108.4931641	1133.041676	26.47323436	797661.3401	0.499722928	0.630547762	0.130824834	0.570330869	0.025328911	401.512932	16.17	27.18	11.01	21.16	2.27	14897.77	1
133.73349	240.6606598	106.9271698	162.831553	20.73895109	115121.9079	-0.586563587	0.565767288	1.152330875	0.06154343	0.178320009	43.5112047	-1.643798828	1.090332031	2.734130859	0.139587834	0.481008409	98.68859863	943.4676514	1031.059814	87.59216309	989.1495923	20.31588226	699328.7618	0.362030625	0.659213662	0.297183037	0.505777757	0.058969808	357.5848745	2.05	26.04	23.99	16.33	6.40	11544.07	1
120.2774506	213.3804932	93.1030426	157.0053528	25.03395635	110845.7791	-0.979420424	0.460470974	1.439891398	-0.169646982	0.257708905	-119.770769	-1.367126465	0.601989746	1.969116211	-0.189701588	0.365674705	-133.9293213	941.6143799	1060.442505	118.828125	1005.966798	27.1179585	710212.5591	0.403923273	0.63920337	0.235280097	0.534810082	0.060247804	377.5759181	15.37	31.82	16.45	21.12	3.21	14911.73	1
155.2306824	253.7198181	98.48913574	196.1266048	11.52320967	138073.1298	-0.94386667	0.577604532	1.521471202	-0.01488091	0.21485692	-10.47616047	-1.036621094	0.787963867	1.824584961	0.00999312	0.329869016	7.03515625	1061.733643	1153.841064	92.10742188	1109.211178	20.71118945	780884.6691	0.343423307	0.656737983	0.313314676	0.522589248	0.070066532	367.9028308	6.87	23.92	17.05	15.79	3.50	11116.64	1
0.1374823	359.8006592	359.6631769	58.41339562	55.66865747	41239.85731	-0.254261792	0.818271995	1.072533786	0.155390205	0.192355545	109.7054844	-0.93371582	1.148071289	2.081787109	0.150325267	0.504418128	106.1296387	1095.363037	1196.804565	101.4415283	1135.055339	21.80825383	801349.0692	0.25921604	0.707000017	0.447783977	0.452400069	0.126184076	319.3944487	2.88	28.67	25.78	16.42	8.40	11589.33	1
125.1908875	215.5837097	90.39282227	148.9724894	16.82665411	105025.605	-0.685146868	0.940411866	1.625558734	-0.028249952	0.248126748	-19.91621624	-0.880981445	1.030883789	1.911865234	-0.073317507	0.356677792	-51.68884277	1043.546875	1148.933105	105.3862305	1091.347201	25.33904412	769399.777	0.369519502	0.626585662	0.25706616	0.48513176	0.046967674	342.017891	9.67	28.39	18.72	18.59	3.88	13106.78	1
0.007422754	359.9291077	359.9216849	216.4194537	164.7092226	152792.1343	-0.722745001	0.77860111	1.501346111	0.081743547	0.244514745	57.71094406	-1.023925781	1.359191895	2.383117676	0.114090701	0.366033425	80.54803467	878.1528931	973.9306641	95.777771	925.5317525	24.43844678	653425.4173	0.322652727	0.587051034	0.264398307	0.478978735	0.050146008	338.1589869	13.19	29.04	15.85	19.11	2.71	13489.73	1
0.130908251	359.6722717	359.5413635	93.96721902	106.1314563	65777.05331	-0.875742972	0.340288967	1.216031939	-0.190298081	0.206928305	-133.2086568	-1.166137695	0.763793945	1.929931641	-0.176145891	0.434797191	-123.302124	1112.553345	1205.259155	92.70581055	1163.03332	24.92864572	814123.3243	0.40976879	0.675255597	0.265486807	0.525400998	0.060404631	367.7806988	6.52	32.00	25.49	19.73	4.89	13812.43	1
0.033498652	359.7718506	359.7383519	318.7586261	69.43417898	224087.3142	-0.519419074	0.50249058	1.021909654	-0.001618804	0.233960283	-1.138018951	-0.955932617	0.761474609	1.717407227	-0.025279494	0.31125732	-17.77148438	1038.622192	1118.25061	79.62841797	1073.530933	21.31292697	754692.2456	0.41052559	0.606978178	0.196452588	0.507546513	0.051353827	356.8051984	8.59	23.44	14.85	16.59	3.83	11659.74	1
41.30502701	140.5871429	99.28211594	100.9182916	27.62222068	70844.64072	-1.37165463	0.487210304	1.858864933	-0.213141754	0.292710662	-149.6255113	-1.585388184	0.703125	2.288513184	-0.274419627	0.405706976	-192.6425781	1023.550415	1146.888916	123.338501	1093.857657	28.88192476	767888.0751	0.415736139	0.642336488	0.226600349	0.5188255	0.059942343	364.2155011	16.03	29.94	13.91	23.37	3.72	16407.73	1
48.01175308	109.7542801	61.74252701	71.48933829	13.36502984	50471.47283	-0.846364737	0.582855642	1.429220378	-0.04571654	0.246394371	-32.2758772	-1.10144043	1.164550781	2.265991211	-0.074149934	0.340729969	-52.34985352	1051.298584	1174.279297	122.9807129	1119.230371	29.97079274	790176.6417	0.383789688	0.593765795	0.209976107	0.493886969	0.054851794	348.6842004	15.99	28.03	12.04	22.49	2.40	15878.38	1
0.58020699	359.5635986	358.9833916	133.9363286	133.4231868	94692.98434	-1.099307418	0.606235623	1.705543041	-0.207285975	0.316333469	-146.5511843	-1.279785156	1.064208984	2.343994141	-0.197262172	0.461731876	-139.4643555	1006.361084	1111.964844	105.6037598	1068.386513	26.1931688	755349.2646	0.463892072	0.639474034	0.175581962	0.537824616	0.035660971	380.2420038	10.66	28.63	17.98	21.51	3.35	15208.83	1
111.1388092	197.858078	86.7192688	143.0449576	21.16573986	101132.785	-0.841592669	0.170441002	1.012033671	-0.184595776	0.151346253	-130.5092133	-0.905639648	0.427124023	1.332763672	-0.234960661	0.256005236	-166.1171875	1079.360107	1189.975708	110.6156006	1136.733076	27.37474736	803670.2847	0.418474555	0.58511138	0.166636825	0.505242927	0.033331936	357.2067494	15.19	26.65	11.47	20.71	2.24	14645.37	1
218.5865936	286.5114441	67.92485046	248.866088	19.56036335	175948.3242	-0.583457232	0.308474451	0.891931683	-0.153023846	0.168891752	-108.1878588	-0.842041016	0.496948242	1.338989258	-0.148730158	0.270784874	-105.1522217	1125.250732	1243.731445	118.4807129	1189.102161	31.05142431	840695.228	0.448047519	0.637676239	0.18962872	0.53754194	0.034697204	380.0421518	16.41	28.26	11.85	22.48	2.44	15896.84	1
146.3961182	280.0440063	133.6478882	212.6934838	38.60244495	150161.5995	-1.50809443	0.409281135	1.917375565	-0.316514323	0.314929278	-223.4591118	-2.20324707	0.975463867	3.178710938	-0.351276344	0.460280901	-248.0010986	1120.504517	1234.365601	113.861084	1189.854562	25.44801517	840037.3207	0.477289408	0.673617303	0.196327895	0.558006938	0.042989506	393.9528986	11.11	32.38	21.27	22.07	4.69	15581.51	1
0.458444178	359.1879272	358.7294831	236.3981536	133.0835054	166187.902	-1.19091332	0.10170684	1.29262016	-0.273885366	0.204664832	-192.5414121	-1.753173828	0.615478516	2.368652344	-0.352208014	0.410232259	-247.6022339	1018.151428	1128.120483	109.9690552	1081.608174	25.99887286	760370.5462	0.354239762	0.665869713	0.311629951	0.507261782	0.06192067	356.6050329	10.60	30.48	19.87	21.44	4.36	15074.04	1
72.83956146	163.725708	90.88614655	131.7646425	22.26719693	92630.5437	-0.862663031	0.145324633	1.007987663	-0.190177004	0.18260795	-133.6944341	-1.159790039	0.290405273	1.450195313	-0.194258493	0.266080626	-136.5637207	1068.9729	1187.739502	118.7666016	1135.3026	27.65275425	798117.7279	0.438456982	0.608687043	0.170230061	0.527316089	0.038850143	370.7032103	15.41	26.49	11.08	21.30	2.25	14976.58	1
78.93810272	171.0315552	92.09345245	135.8706578	20.1775777	96060.5551	-0.634970725	0.297854066	0.93282479	-0.137280875	0.12739787	-97.05757831	-0.905273438	0.540527344	1.445800781	-0.151100256	0.240089227	-106.8278809	1097.022339	1188.941895	91.91955566	1143.988715	22.41949916	808800.0219	0.45948714	0.697829425	0.238342285	0.539470354	0.052440989	381.4055404	10.91	21.70	10.79	17.35	2.39	12269.61	1
0.147347689	359.8786621	359.7313144	70.45919674	70.07145622	49391.89692	-1.296029449	0.255919814	1.551949263	-0.298181431	0.278976759	-209.025183	-1.947875977	0.528320313	2.476196289	-0.311778897	0.432259135	-218.5570068	1037.905518	1149.961792	112.0562744	1099.323186	25.72226272	770625.5537	0.477154076	0.647528827	0.170374751	0.55320982	0.040211944	387.8000836	12.52	29.94	17.42	21.18	3.31	14847.24	1
43.31785202	358.7724915	315.4546394	161.5455622	25.61658092	114374.258	-0.286610991	0.201329842	0.487940833	-0.051376291	0.081852864	-36.37441372	-0.810241699	0.468688965	1.278930664	-0.189235709	0.279254845	-133.9788818	859.2097778	963.3630371	104.1532593	901.0032534	30.65613007	637910.3034	0.14330104	0.543539822	0.400238782	0.392574618	0.120450693	277.9428295	0.16	27.39	27.23	20.28	7.65	14359.15	1
179.3332367	246.7931366	67.4598999	222.0734202	14.69589998	156117.6144	-0.516853213	0.373862147	0.890715361	-0.119122933	0.138222676	-83.74342224	-0.990478516	0.70703125	1.697509766	-0.129342265	0.306754417	-90.9276123	1057.642822	1157.167358	99.52453613	1105.630823	26.98158572	777258.4689	0.418830842	0.622320116	0.203489274	0.517096664	0.043087765	363.5189545	10.48	26.50	16.02	19.70	3.68	13846.42	1
0.486880392	358.5010681	358.0141877	23.75631997	20.26855896	16700.69294	-0.801340461	0.493099898	1.294440359	-0.061540017	0.153945436	-43.26263195	-0.846069336	0.875	1.721069336	-0.075770762	0.267569119	-53.2668457	1046.209351	1156.990112	110.7807617	1097.29286	26.70212415	771396.8807	0.420283288	0.661067247	0.24078396	0.50855118	0.052631072	357.5114794	12.36	27.29	14.93	20.08	3.65	14114.94	1
241.1784668	280.3335266	39.15505981	264.4040596	9.510795918	186669.2661	-0.885497689	0.660245001	1.545742691	-0.024483941	0.283306702	-17.28566264	-1.388549805	0.888183594	2.276733398	0.020607232	0.391519124	14.54870605	1029.211792	1165.348267	136.1364746	1101.854147	36.40484224	777909.0281	0.43249169	0.618225336	0.185733646	0.523654423	0.037933142	369.7000228	17.48	33.98	16.51	25.52	3.32	18019.58	1
0.228258461	359.7658691	359.5376107	116.8432662	127.6688991	82023.97289	-1.620244265	0.459019899	2.079264164	-0.253472722	0.373044193	-177.9378508	-2.075561523	0.837280273	2.912841797	-0.237845136	0.543284279	-166.9672852	965.8597412	1076.161499	110.3017578	1032.430558	25.44249844	724766.2517	0.442417443	0.665726244	0.223308802	0.573165492	0.058701053	402.3621753	13.36	32.69	19.32	20.90	4.42	14670.10	1
81.56274414	106.252739	24.68999481	94.02836341	4.877183188	66478.05293	-0.238208041	0.280236602	0.518444642	0.002953628	0.096408867	2.088214921	-0.643310547	0.569885254	1.213195801	-0.053946963	0.248384944	-38.14050293	850.9321899	958.3317871	107.3995972	901.057918	25.58447254	637047.9481	0.291116744	0.560571253	0.269454509	0.457008424	0.05670966	323.1049561	14.35	30.05	15.70	19.40	3.12	13715.44	1
250.7372437	290.7985229	40.0612793	271.6729604	10.16258083	191529.4371	-0.507052898	0.383747876	0.890800774	-0.032882576	0.145003819	-23.18221627	-0.88684082	0.577392578	1.464233398	-0.07574965	0.285734455	-53.40350342	985.9621582	1089.446899	103.4847412	1039.122807	26.93788264	732581.5787	0.405855834	0.576246679	0.170390844	0.492629494	0.036469254	347.3037933	13.93	26.40	12.47	19.70	3.11	13886.38	1
147.4474335	275.8181763	128.3707428	212.9425139	32.71971582	150550.3573	-0.735983431	0.379156083	1.115139514	-0.217010741	0.188028116	-153.4265937	-0.975219727	0.80480957	1.780029297	-0.229964325	0.25748168	-162.5847778	1018.104919	1104.991089	86.88616943	1066.255147	21.37903318	753842.3889	0.483348817	0.64871335	0.165364534	0.545793776	0.028998275	385.8761996	12.84	21.55	8.70	17.36	1.68	12271.99	1
0.003479475	359.8659363	359.8624568	269.4909003	120.3346172	188913.1211	-1.150125146	1.259902835	2.410027981	-0.10025673	0.459826565	-70.27996741	-1.264343262	1.382629395	2.646972656	-0.101978863	0.573993414	-71.48718262	859.3162842	963.7207642	104.40448	914.3538867	28.83101043	640962.0746	0.411716193	0.639237821	0.227521628	0.521589262	0.050196678	365.6340727	13.78	32.03	18.25	22.29	4.06	15622.27	1
26.39162636	120.5567932	94.16516685	69.13744234	24.73654652	48534.48452	-1.057726979	0.403894752	1.461621732	-0.194112813	0.215222296	-136.2671948	-1.366210938	0.620483398	1.986694336	-0.214752632	0.301049534	-150.7563477	1049.657959	1154.322021	104.6640625	1108.0275	23.74136953	777835.3048	0.454179496	0.644833386	0.19065389	0.534084971	0.045775792	374.9276498	13.49	28.12	14.63	19.39	3.15	13612.92	1
0.002129241	359.4485168	359.4463876	261.5876511	139.0547554	184942.4693	-0.524960399	0.506130576	1.031090975	-0.128684801	0.185577121	-90.98015427	-0.861083984	0.776855469	1.637939453	-0.161713035	0.268150865	-114.3311157	1002.599976	1094.245483	91.64550781	1047.409993	23.5565137	740518.8652	0.420138121	0.659987628	0.239849508	0.513976402	0.049414933	363.3813161	11.60	25.06	13.46	17.92	2.94	12669.84	1
134.7797394	242.8731384	108.093399	195.1942121	35.05459874	137221.5311	-1.567934632	0.842436075	2.410370708	-0.28698243	0.412374591	-201.7486486	-1.874084473	1.027893066	2.901977539	-0.265591053	0.549352068	-186.7105103	907.1976929	1048.919922	141.722229	991.8600888	35.01126655	697277.6425	0.460363001	0.634604335	0.174241334	0.552592202	0.03612675	388.4723184	20.81	34.25	13.44	27.04	2.93	19011.96	1
0.217201009	359.6323853	359.4151842	206.6577062	141.750987	146313.656	-0.793984532	0.360283375	1.154267907	-0.168484965	0.238513498	-119.2873554	-1.340087891	0.525756836	1.865844727	-0.334943179	0.391614482	-237.1397705	1039.188843	1133.530762	94.34191895	1087.177834	20.94677465	769721.9063	0.405665696	0.630927384	0.225261688	0.489100922	0.046865509	346.2834525	8.98	31.65	22.67	20.07	5.71	14206.58	1
165.7062836	274.5625305	108.8562469	213.7085294	32.67042899	150450.8047	-1.137662649	0.673920095	1.811582744	-0.206448435	0.291293956	-145.3396986	-1.253295898	1.071533203	2.324829102	-0.179399317	0.380119454	-126.2971191	1134.00354	1234.446777	100.4432373	1196.662164	24.4133464	842450.1637	0.459367901	0.65233618	0.192968279	0.561488745	0.035143826	395.2880764	11.86	30.47	18.61	20.40	3.89	14362.30	1
0.059893321	359.7915649	359.7316716	157.7506543	152.498353	110425.458	-1.288151503	0.190526977	1.47867848	-0.291329279	0.237507954	-203.930495	-1.67388916	0.526062012	2.199951172	-0.374817418	0.394347598	-262.3721924	942.975708	1064.598022	121.6223145	1011.304665	28.00271833	707913.2654	0.410571098	0.668430507	0.257859409	0.529301162	0.058118771	370.5108135	12.77	31.94	19.16	22.68	4.35	15877.58	1
67.07118225	168.7258301	101.6546478	121.5882148	30.35195197	85354.92682	-1.257839203	0.692965686	1.950804889	-0.109115778	0.440732993	-76.5992764	-1.968139648	1.101196289	3.069335938	-0.082155755	0.540593031	-57.67333984	1057.708496	1181.908447	124.1999512	1128.603672	30.28876792	792279.7781	0.441865951	0.655970871	0.214104921	0.542673196	0.043761999	380.9565836	16.42	30.84	14.42	24.49	2.40	17191.32	1
53.21076965	151.1997223	97.98895264	99.37552908	16.69408021	70258.49906	-1.199180841	0.673818469	1.87299931	-0.192339485	0.333804413	-135.9840161	-1.880859375	0.94543457	2.826293945	-0.269586674	0.447550967	-190.5977783	1044.917236	1176.471802	131.5545654	1106.331666	33.9076753	782176.4877	0.395984709	0.613730311	0.217745602	0.497259579	0.044710992	351.5625226	14.62	31.23	16.62	24.13	3.26	17062.03	1
0.376032114	359.9153137	359.5392816	264.9462321	114.9575713	186787.0937	-1.054633021	0.38475731	1.439390332	-0.206283727	0.285816639	-145.4300274	-1.20703125	0.5546875	1.76171875	-0.220501925	0.357832143	-155.4538574	1102.205322	1219.616943	117.4116211	1163.057201	28.05253987	819955.3265	0.408816516	0.605301559	0.196485043	0.526726547	0.041709875	371.3422156	17.38	26.20	8.82	21.34	2.01	15043.48	1
180.9272461	255.8305054	74.90325928	222.4123779	22.57430976	156355.9016	-0.636279047	0.574450314	1.210729361	-0.123769651	0.227321301	-87.01006483	-0.768310547	0.711669922	1.479980469	-0.11001435	0.260854767	-77.34008789	1034.976318	1147.071411	112.0950928	1097.054423	28.28547743	771229.2592	0.434106082	0.596054554	0.161948472	0.539479019	0.03692794	379.2537503	18.71	25.66	6.94	21.84	1.30	15351.98	1
26.29673195	102.2278366	75.93110466	69.44811518	15.29240758	49169.26554	-0.550614059	0.411940813	0.962554872	-0.050163481	0.197899059	-35.51574439	-0.883911133	0.881347656	1.765258789	0.067595918	0.374921174	47.85791016	1030.112427	1156.879639	126.7672119	1104.085863	34.98746341	781692.7913	0.398181647	0.735368192	0.337186545	0.556754194	0.088557276	394.1819693	2.68	30.13	27.45	24.55	5.16	17380.14	1
171.5005341	257.359375	85.85884094	232.0064422	21.01387404	163100.5288	-0.89572376	0.477604598	1.373328358	-0.158983344	0.217271955	-111.7652907	-1.235107422	0.971923828	2.20703125	-0.074240455	0.37743338	-52.19104004	1029.163574	1138.787964	109.6243896	1094.546759	27.6771152	769466.3713	0.420771748	0.707197785	0.286426038	0.577658758	0.055990703	406.0941066	8.05	30.43	22.38	20.45	3.89	14375.40	1
93.24459076	232.2612305	139.0166397	133.9271179	39.52388573	94418.61813	-1.403166533	0.294907093	1.698073626	-0.256377508	0.294978559	-180.7461428	-1.752807617	0.940917969	2.693725586	-0.359662688	0.429828361	-253.5621948	1004.002258	1114.490234	110.4879761	1061.450272	24.92838625	748322.4419	0.401462078	0.64000845	0.238546371	0.51325359	0.053889112	361.8437806	11.33	29.00	17.67	21.25	4.20	14983.68	1
37.98464966	90.68363953	52.69898987	67.96597996	13.76760957	47644.15195	-0.717748225	0.505409241	1.223157465	-0.046745208	0.217914756	-32.76839096	-1.39440918	0.801208496	2.195617676	-0.056644369	0.362327519	-39.70770264	955.7365723	1075.059937	119.3233643	1023.570183	28.40460133	717522.6982	0.396116287	0.619181097	0.22306481	0.507107071	0.050917612	355.4820569	11.66	29.69	18.03	21.77	4.03	15263.48	1
143.1472931	253.0443878	109.8970947	198.0511147	28.74496084	140022.1381	-1.066155672	0.480006337	1.546162009	-0.198149275	0.27071932	-140.0915373	-1.305541992	0.844604492	2.150146484	-0.143488559	0.367029549	-101.4464111	1078.036499	1175.427002	97.39050293	1140.413832	22.84582327	806272.5791	0.439512968	0.664704978	0.22519201	0.578057647	0.049102773	408.6867565	10.13	30.23	20.10	18.38	5.03	12993.18	1
114.1347656	156.6040344	42.4692688	136.9921102	7.049401439	96305.4535	-1.274533868	0.789636195	2.064170063	-0.028080418	0.233108622	-19.74053416	-1.658813477	1.002685547	2.661499023	-0.048833682	0.345834994	-34.33007813	1029.73938	1154.866699	125.1273193	1088.92986	31.47614164	765517.6913	0.434487581	0.605247021	0.170759439	0.511461359	0.037495201	359.5573356	15.89	29.46	13.57	23.18	2.90	16294.29	1
0.059375275	359.9928284	359.9334531	216.1075747	155.2675152	152788.0553	-1.578720689	0.542071879	2.120792568	-0.29154748	0.407693179	-206.1240687	-1.817749023	0.819213867	2.636962891	-0.367485597	0.546311901	-259.8123169	936.4936523	1066.292847	129.7991943	1002.255355	31.21412996	708594.5356	0.473775327	0.67571944	0.201944113	0.537103831	0.045521906	379.7324082	13.84	30.82	16.97	23.29	3.66	16465.13	1
188.3865662	296.5074463	108.1208801	217.5032888	14.94676387	152687.3087	-0.735114574	1.095050931	1.830165505	-0.036432852	0.302634085	-25.57586227	-0.942871094	1.093017578	2.035888672	-0.008618825	0.399011291	-6.050415039	1202.590942	1330.119995	127.5290527	1268.4083	31.7665427	890422.6268	0.44265151	0.597410738	0.154759228	0.51651797	0.024857778	362.5956146	11.92	27.34	15.42	22.64	2.87	15891.04	1
108.8935547	155.1210022	46.22744751	130.2442013	11.305429	91822.16194	-0.412506789	0.180612892	0.593119681	-0.112706975	0.098572402	-79.45841737	-0.917358398	0.877075195	1.794433594	-0.145734811	0.305871871	-102.743042	1198.931152	1333.250977	134.3198242	1268.240967	33.58231723	894109.8817	0.380818516	0.571371973	0.190553457	0.4990169	0.04332497	351.8069144	18.73	31.27	12.54	24.48	3.27	17256.31	1
37.2179184	64.96881104	27.75089264	47.79907665	6.04680436	33650.54996	-0.299691498	0.388027281	0.687718779	0.025907625	0.120560614	18.23896835	-0.976379395	0.715942383	1.692321777	-0.06993944	0.277435839	-49.23736572	912.7139893	1039.688843	126.9748535	969.7892332	30.87312737	682731.6202	0.306588203	0.570216358	0.263628155	0.452919798	0.052874413	318.8555376	10.89	31.80	20.91	22.45	3.59	15808.18	1
37.92674637	54.99455643	17.06781006	46.37249005	3.449386547	32692.60549	-0.199936062	0.215560123	0.415496185	-0.009257903	0.064484833	-6.526821804	-0.973327637	0.553710938	1.527038574	-0.075497112	0.288835063	-53.22546387	897.8412476	1010.722961	112.8817139	954.5555483	31.71798736	672961.6616	0.27018708	0.581212819	0.311025739	0.466035283	0.076991109	328.5548742	4.97	26.83	21.86	21.85	3.81	15405.37	1
183.313736	219.4082489	36.09451294	202.9019634	8.54776661	143451.6881	-0.335018814	0.359090894	0.694109708	-0.002794326	0.112693738	-1.975588552	-0.671264648	0.760681152	1.431945801	-0.071974694	0.250460072	-50.8861084	840.0906982	919.9780273	79.8873291	875.5490484	20.33552382	619013.1772	0.367773324	0.519635201	0.151861876	0.454465587	0.025590819	321.3071701	9.27	23.68	14.41	15.75	3.40	11135.07	1
158.115799	249.6552734	91.53947449	193.1947953	24.51451835	135815.9411	-1.384941339	0.182123721	1.56706506	-0.216058047	0.21736134	-151.8888071	-1.736816406	0.569946289	2.306762695	-0.21530668	0.319206828	-151.3605957	1060.980347	1173.219116	112.2387695	1125.013638	26.99207289	790884.5876	0.438973486	0.629134536	0.190161049	0.539284496	0.041192619	379.1170006	14.13	28.18	14.05	21.14	3.06	14859.13	1
188.446701	262.5664673	74.11976624	221.880723	14.27714945	157091.5519	-1.070539117	0.619955897	1.690495014	-0.088348657	0.242635125	-62.55084908	-1.45703125	0.835693359	2.292724609	-0.097721596	0.383194529	-69.18688965	1125.265747	1226.615112	101.3493652	1183.257025	23.24596494	837745.9734	0.421052992	0.660385251	0.239332259	0.531115357	0.061021754	376.0296725	9.12	26.89	17.77	17.76	4.11	12573.36	1
156.632309	200.0504303	43.41812134	172.2973708	10.17773474	121125.0517	-0.385517418	0.098502889	0.484020308	-0.081489296	0.069977823	-57.28697519	-0.74987793	0.480834961	1.230712891	-0.15906682	0.219618447	-111.8239746	1216.85437	1329.534912	112.680542	1270.57159	27.29287893	893211.8275	0.408588886	0.540275574	0.131686687	0.480268859	0.031914585	337.6290081	13.75	27.98	14.23	20.67	2.99	14528.51	1
76.50653076	143.9588165	67.45228577	99.15244237	15.12350025	70001.62431	-0.477511972	0.313719004	0.791230977	-0.09834713	0.17070318	-69.43307346	-0.866943359	0.583129883	1.450073242	-0.079086001	0.289905705	-55.8347168	1095.043457	1210.055664	115.012207	1157.935771	30.01562995	817502.6541	0.418077648	0.607657492	0.189579844	0.52660009	0.034211754	371.7796635	14.95	26.84	11.89	21.40	3.09	15110.58	1
41.38759995	128.2999573	86.91235733	83.35395024	25.2020896	58931.24282	-1.078757524	1.090382338	2.169139862	-0.127572406	0.427251729	-90.19369117	-1.378173828	1.77722168	3.155395508	-0.122666247	0.559281417	-86.72503662	1026.433228	1138.406616	111.9733887	1091.497919	27.32383063	771689.0284	0.393926471	0.633974016	0.240047544	0.539885021	0.043783743	381.69871	12.72	32.45	19.73	22.37	4.48	15813.57	1
71.7464447	176.6950531	104.9486084	147.7210194	20.37648448	104438.7607	-1.424399257	0.316508383	1.740907639	-0.196482997	0.313754523	-138.9134788	-1.672302246	0.952758789	2.625061035	-0.226111859	0.479452209	-159.861084	1003.788757	1137.74646	133.9577026	1073.696831	28.98921911	759103.6592	0.394719601	0.673575938	0.278856337	0.534361807	0.074706366	377.7937974	11.79	31.67	19.88	22.24	5.35	15722.20	1
1.398815274	359.5785522	358.179737	35.58561861	22.67717512	24981.10426	-0.520415068	0.373960763	0.894375831	-0.047310519	0.140244209	-33.21198453	-0.834899902	0.757324219	1.592224121	-0.05199891	0.303504559	-36.50323486	1005.046692	1093.987183	88.94049072	1049.569784	23.37820019	736797.9882	0.410432845	0.635682702	0.225249857	0.504849224	0.047206699	354.4041555	6.20	22.23	16.02	16.36	3.65	11481.36	1
52.24597168	343.8143616	291.5683899	96.34877533	29.14571906	68022.23539	-0.654545784	0.97003603	1.624581814	-0.15407899	0.200061485	-108.7797666	-0.632080078	0.864868164	1.496948242	-0.061962268	0.31725659	-43.74536133	1074.438354	1182.032471	107.5941162	1137.094185	25.52938058	802788.4949	0.460875243	0.684664786	0.223789543	0.561560185	0.048648609	396.4614909	0.26	29.99	29.73	19.73	4.08	13931.02	1
289.7421265	340.0729065	50.33078003	310.2604186	9.52672938	216561.7722	-0.609881103	0.634503484	1.244384587	0.005631693	0.195670149	3.93092177	-1.072937012	1.079833984	2.152770996	0.010506879	0.428781144	7.33380127	829.519104	959.2814941	129.7623901	901.7696471	33.64673427	629435.2137	0.244517297	0.614337265	0.369819969	0.480416698	0.08523113	335.3308555	10.35	34.36	24.01	23.99	5.96	16744.34	1
98.00453949	221.2620239	123.2574844	150.1353382	27.50176251	105545.1427	-0.870023668	0.81568718	1.685710847	-0.153956071	0.252433215	-108.2311178	-1.229858398	1.145141602	2.375	-0.134350968	0.45107409	-94.44873047	1000.462341	1096.4021	95.9397583	1051.067354	21.87385306	738900.3497	0.436300367	0.731781423	0.295481056	0.539183876	0.07407049	379.0462651	4.64	28.22	23.57	17.51	4.78	12311.42	1
0.042799797	359.9517822	359.9089824	320.0615528	43.0094217	226283.5178	-0.763989508	0.248797983	1.012787491	-0.154509315	0.17765546	-109.2380854	-1.361206055	0.546020508	1.907226563	-0.126524066	0.292075083	-89.45251465	1278.808472	1385.358154	106.5496826	1343.364856	26.31924299	949758.9529	0.419986486	0.615991771	0.196005285	0.530296123	0.042792703	374.9193592	14.47	31.28	16.81	20.51	3.77	14503.46	1
195.3400116	291.6784363	96.33842468	235.8226289	25.61535584	166962.4213	-0.581106246	0.223292127	0.804398373	-0.222679134	0.13957644	-157.6568267	-0.815185547	0.377685547	1.192871094	-0.264085673	0.222097861	-186.9726563	1268.199829	1398.984375	130.7845459	1337.279921	33.80077117	946794.184	0.416341186	0.591181815	0.174840629	0.513746316	0.034336171	363.7323918	20.33	34.75	14.43	25.02	3.38	17713.76	1
0.080803268	359.6722717	359.5914685	87.64433489	105.1297757	61701.61176	-1.092093825	0.393810213	1.485904038	-0.218734794	0.242751133	-153.9892947	-1.361572266	0.758544922	2.120117188	-0.210100174	0.328949957	-147.9105225	1182.872314	1279.745972	96.87365723	1240.641775	23.26095057	873411.8097	0.409834236	0.661481202	0.251646966	0.544517765	0.059435575	383.3405064	12.87	27.97	15.10	19.02	3.46	13389.91	1
80.78514862	159.0079956	78.22284698	121.9546138	12.41421502	85978.00271	-0.76228565	0.685951591	1.44823724	-0.077577559	0.262095196	-54.69217908	-0.963378906	0.913818359	1.877197266	-0.113610407	0.303853895	-80.09533691	1282.022461	1438.194946	156.1724854	1357.100919	38.56655417	956756.1482	0.43477115	0.564711809	0.129940659	0.489344734	0.028692284	344.9880373	21.56	37.89	16.33	27.55	3.59	19424.90	1
93.37255096	156.0770264	62.7044754	120.8485096	11.16902386	85560.74482	-0.580373585	0.259461701	0.839835286	-0.171911036	0.176723452	-121.7130135	-1.011108398	0.784179688	1.795288086	-0.239138673	0.329337435	-169.3101807	1340.148804	1512.583618	172.4348145	1420.109907	45.05002407	1005437.814	0.43414408	0.685888052	0.251743972	0.513584364	0.050042476	363.6177296	19.24	37.54	18.30	30.69	4.35	21729.41	1
0.014748738	359.9998169	359.9850682	157.4033985	158.6442941	111126.7993	-0.620549619	0.946908236	1.567457855	0.084396229	0.341394744	59.58373796	-0.864746094	1.323242188	2.187988281	0.100019504	0.472414707	70.61376953	1038.396606	1152.348633	113.9520264	1094.017351	28.16610955	772376.2501	0.331217527	0.564106107	0.232888579	0.484664151	0.042491949	342.1728906	15.29	31.02	15.73	22.90	3.95	16166.01	1
0.050522421	359.5940857	359.5435633	255.8879846	55.2799641	179633.3652	-1.348032951	0.327326536	1.675359488	-0.187543124	0.308458717	-131.6552727	-1.506347656	0.884521484	2.390869141	-0.259202919	0.480277802	-181.9604492	1194.942017	1300.569092	105.6270752	1249.383251	22.24304792	877067.0419	0.391184837	0.702340782	0.311155945	0.541577682	0.086976325	380.1875331	8.56	29.82	21.26	19.00	5.29	13337.68	1
141.5757446	195.2547913	53.67904663	174.4450355	13.59558498	122983.7501	-0.632477283	0.579842985	1.212320268	-0.150847177	0.148305554	-106.3472598	-1.950805664	0.92578125	2.876586914	-0.292728072	0.37815618	-206.373291	1285.141113	1449.511597	164.3704834	1361.473431	41.36793409	959838.7686	0.413941503	0.589320004	0.175378501	0.479553194	0.032834737	338.0850018	17.25	39.73	22.48	29.31	5.56	20664.17	1
73.55260468	95.63949585	22.08689117	84.52273042	4.807200997	60095.66133	-0.416752338	0.294697881	0.711450219	-0.046074347	0.104021362	-32.7588608	-0.547363281	0.736694336	1.284057617	-0.008452897	0.245194597	-6.010009766	1174.78772	1312.033936	137.2462158	1249.181624	33.04228685	888168.135	0.410602689	0.598573744	0.187971056	0.517062392	0.047122881	367.6313607	16.73	30.79	14.06	24.34	3.89	17307.72	1
0.085798539	359.6750183	359.5892198	242.2781456	142.0224993	170806.0926	-0.666466773	0.28730002	0.953766793	-0.148424912	0.151184511	-104.6395633	-0.867797852	0.469482422	1.337280273	-0.222046245	0.251269427	-156.5426025	1194.157593	1290.972046	96.81445313	1242.698176	22.54478389	876102.2137	0.404894471	0.645739734	0.240845263	0.503131124	0.062949366	354.7074421	13.77	29.79	16.02	18.26	3.16	12875.14	1
83.97277069	125.4939346	41.52116394	104.8022292	7.577952885	73256.75824	-0.336550474	0.358598918	0.695149392	-0.057818011	0.119422773	-40.41478962	-1.624511719	0.499511719	2.124023438	-0.124101674	0.259862592	-86.74707031	1235.33728	1378.816284	143.4790039	1305.405621	35.64955845	912478.5289	0.315150619	0.586276591	0.271125972	0.471436819	0.06064609	329.5343365	17.87	37.45	19.58	25.38	2.90	17740.55	1
159.8384399	217.1987915	57.36035156	184.2913229	13.97722684	130293.9653	-0.839381099	1.160584927	1.999966025	-0.040278164	0.297376314	-28.47666175	-2.572509766	1.808105469	4.380615234	-0.141101368	0.491123784	-99.75866699	1264.793091	1438.77124	173.9781494	1341.936727	39.03596924	948749.2657	0.344572008	0.567285657	0.222713649	0.473064609	0.055905683	334.4566788	16.47	44.40	27.93	27.99	6.16	19790.44	1
185.9394531	247.6966248	61.75717163	218.0395693	14.36445064	154372.015	-0.467704892	0.228866175	0.696571067	-0.114061069	0.133583918	-80.75523655	-0.730224609	0.670654297	1.400878906	-0.133956823	0.267525809	-94.84143066	1221.739136	1330.357544	108.6184082	1280.143149	26.25378	906341.3494	0.351252645	0.609264374	0.258011729	0.518053644	0.057837556	366.7819797	12.60	25.16	12.56	19.79	3.39	14013.80	1
0.030693859	359.9384766	359.9077827	231.1489623	151.9049228	163191.1674	-0.691016078	0.684365749	1.375381827	-0.104365317	0.285901843	-73.68191387	-1.105834961	1.035766602	2.141601563	-0.12238033	0.391581874	-86.4005127	1172.154297	1296.382935	124.2286377	1238.798176	31.5911078	874591.5121	0.352454573	0.633877814	0.281423241	0.511609181	0.049690211	361.196082	14.33	29.56	15.23	22.98	2.97	16221.64	1
100.7547379	173.4932556	72.73851776	139.4372457	20.32118989	98303.25821	-0.692935407	0.301832765	0.994768173	-0.151708135	0.178838011	-106.9542353	-1.237670898	0.459960938	1.697631836	-0.26854326	0.310641757	-189.322998	1217.265991	1325.491577	108.2255859	1273.288836	27.6196429	897668.6294	0.379661024	0.56211853	0.182457507	0.47200877	0.044126081	332.7661827	12.98	32.19	19.21	21.83	3.64	15387.42	1
1.394090414	358.6185303	357.2244399	155.1376441	45.5451411	109372.0391	-0.415745199	0.513712108	0.929457307	0.003469157	0.146667463	2.445755836	-1.118408203	0.873535156	1.991943359	-0.22569026	0.345243094	-159.1116333	1008.770264	1124.790283	116.0200195	1045.769846	33.06801769	737267.7413	0.14094694	0.52839911	0.38745217	0.34725372	0.110583774	244.8138725	0.24	33.84	33.60	21.53	11.29	15177.03	1
24.18558121	71.94660187	47.76102066	57.40467938	8.172751336	40585.10832	-0.661215723	0.633114159	1.294329882	-0.009427973	0.213033148	-6.665576679	-1.051757813	0.536010742	1.587768555	-0.125461174	0.319405023	-88.7010498	1208.630493	1340.542847	131.9123535	1268.035126	31.3737582	896500.8337	0.346466601	0.52984345	0.183376849	0.463114888	0.044074788	327.4222256	13.65	37.62	23.96	23.36	3.88	16514.04	1
59.1314888	113.2455063	54.11401749	84.99577326	13.10831742	60007.01592	-0.540275931	0.354263633	0.894539565	-0.114098234	0.163445103	-80.55335317	-1.020629883	0.685791016	1.706420898	-0.226261301	0.29578512	-159.7404785	1289.200562	1423.383179	134.1826172	1346.519275	36.19674269	950642.6079	0.375643283	0.633996248	0.258352965	0.479351693	0.044943872	338.4222952	13.12	34.24	21.12	25.87	5.92	18260.82	1
0.028325479	358.14328	358.1149545	168.1744963	146.0021051	118394.8454	-0.811608374	0.265190661	1.076799035	-0.226080053	0.166480285	-159.1603576	-0.966308594	0.571899414	1.538208008	-0.26053342	0.307147806	-183.4155273	1045.917847	1134.80249	88.88464355	1095.255039	21.96623267	771059.5477	0.454116672	0.655071616	0.200954944	0.527826102	0.035867334	371.5895758	10.26	29.22	18.96	19.69	4.14	13864.05	1
218.9458618	346.1949158	127.249054	296.1651756	36.81974165	209092.614	-1.154556394	0.427100897	1.58165729	-0.268306198	0.304625563	-189.424176	-1.614135742	0.898803711	2.512939453	-0.249946746	0.443594829	-176.4624023	1045.031494	1146.748047	101.7165527	1107.261125	26.42949697	781726.3544	0.423400521	0.650990725	0.227590203	0.561410756	0.042845771	396.3559935	9.47	27.17	17.70	20.70	4.36	14612.32	1
22.9853096	108.3949814	85.40967178	71.74632904	24.35695365	50724.65463	-0.586293399	1.529683113	2.115976512	-0.127801537	0.312252193	-90.35568684	-1.057006836	1.60546875	2.662475586	-0.229685394	0.501572614	-162.3875732	1124.407837	1251.72522	127.3173828	1180.755203	30.65165429	834793.9282	0.373202056	0.675044417	0.301842362	0.484759378	0.076325181	342.7248801	13.73	36.27	22.54	23.49	6.68	16609.46	1
251.6920471	290.6743469	38.9822998	270.6131414	6.366360107	189970.4253	-0.383041471	0.642465055	1.025506526	-0.015322325	0.164412575	-10.75627186	-0.614868164	0.88671875	1.501586914	0.004872727	0.284999663	3.420654297	1059.22583	1199.118774	139.8929443	1135.153784	34.49104191	796877.9565	0.394213349	0.592343271	0.198129922	0.515843966	0.047161732	362.1224644	17.46	32.13	14.67	24.52	4.17	17214.50	1
76.92505646	194.0572968	117.1322403	129.615178	32.20174548	90730.62458	-0.984803259	1.219484925	2.204288185	-0.256239109	0.299991182	-179.3673764	-1.184387207	1.1640625	2.348449707	-0.268340628	0.454197494	-187.8384399	931.9671631	1067.071899	135.1047363	1000.269542	33.22203177	700188.6791	0.422339141	0.626456261	0.204117119	0.514761547	0.03507766	360.3330831	8.80	30.73	21.93	25.16	3.41	17614.83	1
0.195860639	359.8765869	359.6807263	103.1378836	108.8479323	72815.3458	-1.034535646	0.611731172	1.646266818	-0.169665055	0.34109064	-119.783529	-1.327880859	0.84753418	2.175415039	-0.302298657	0.441032671	-213.4228516	895.7144165	1014.162048	118.4476318	958.6876787	27.41907	676833.5012	0.393838406	0.617460549	0.223622143	0.47873089	0.045771508	337.9840087	13.44	32.41	18.97	23.38	3.82	16504.83	1
206.7392883	235.5173187	28.7780304	221.1511455	5.552298588	156353.8598	-0.312842995	0.514123857	0.826966852	0.02565437	0.159769092	18.13763957	-0.766113281	0.790161133	1.556274414	0.024679699	0.30983974	17.44854736	992.5911255	1128.784912	136.1937866	1064.035865	34.02128194	752273.3565	0.412674278	0.583510578	0.1708363	0.507377461	0.041808981	358.7158646	18.82	32.13	13.31	25.12	3.05	17758.36	1
79.93179321	126.4976807	46.56588745	102.4671957	10.29821487	72546.77455	-0.260580987	0.404551595	0.665132582	0.069238144	0.144307257	49.02060627	-0.661437988	0.491027832	1.15246582	-0.059328155	0.247872172	-42.0043335	903.5480347	1023.450256	119.9022217	952.1594286	31.73457567	674128.8754	0.361859173	0.524550259	0.162691087	0.433050878	0.031299018	306.6000217	7.96	31.19	23.23	22.98	5.09	16268.74	1
0.005582644	359.9971619	359.9915792	183.425523	172.808897	129681.8448	-0.557318211	0.630247176	1.187565386	-0.00223417	0.140720143	-1.579558408	-0.702819824	0.653686523	1.356506348	-0.151380569	0.22241049	-107.026062	888.595459	996.003418	107.407959	928.3475129	28.14400849	656341.6916	0.253421456	0.514443099	0.261021644	0.410344899	0.063468734	290.1138436	2.10	29.30	27.19	19.45	6.65	13748.20	1
100.5143509	233.395401	132.8810501	151.011122	41.48359348	106160.8188	-1.100777864	0.417158455	1.517936319	-0.224238245	0.283440269	-157.639486	-1.688720703	0.71862793	2.407348633	-0.259133134	0.430525545	-182.1705933	1008.984375	1103.27771	94.29333496	1060.210674	23.06208536	745328.1041	0.478100926	0.652158082	0.174057156	0.550839063	0.034649413	387.2398612	10.70	25.75	15.05	19.72	2.88	13862.03	1
19.32762718	103.0741501	83.7465229	67.18134674	24.03736317	47228.48676	-0.892932653	0.180155084	1.073087737	-0.172755121	0.187980473	-121.4468503	-0.991333008	0.479492188	1.470825195	-0.129389148	0.282554721	-90.96057129	1072.950073	1179.307373	106.3572998	1134.09916	25.04599593	797271.7094	0.466846526	0.621384621	0.154538095	0.559837307	0.032197464	393.565627	13.53	25.39	11.86	19.43	2.28	13659.42	1
0.063619427	359.9877625	359.924143	305.3702641	51.31617396	215591.4065	-0.791489661	0.409580112	1.201069772	-0.15315362	0.184693443	-108.1264558	-0.981811523	0.549316406	1.53112793	-0.205495861	0.241950521	-145.0800781	1100.811768	1201.370117	100.5583496	1155.118689	25.18652218	815513.7943	0.452213973	0.606185436	0.153971463	0.514499482	0.025091768	363.2366346	14.14	25.92	11.79	19.77	2.53	13961.10	1
124.9894714	214.6367493	89.64727783	169.4521662	21.29375812	119633.2293	-0.215447351	0.597579896	0.813027248	0.178788623	0.171251192	126.224768	-0.806396484	0.76940918	1.575805664	0.108936861	0.370302325	76.90942383	961.3384399	1079.182007	117.8435669	1013.930008	31.98900815	715834.5857	0.25826323	0.592383444	0.334120214	0.437959936	0.084634543	309.1997146	4.40	28.48	24.08	22.42	4.30	15830.54	1
120.6336975	298.783783	178.1500854	149.1824667	50.98821905	105472.0039	-1.122457981	0.237543225	1.360001206	-0.034481694	0.157607982	-24.37855785	-1.180969238	0.368652344	1.549621582	-0.291129149	0.362448817	-205.8283081	971.0571289	1082.93457	111.8774414	1012.387641	31.92035173	715758.0623	0.309974998	0.60728842	0.297313422	0.418014336	0.083732774	295.5361359	1.80	29.60	27.80	22.27	8.05	15747.08	1
0.036177073	358.7648315	358.7286545	107.5671817	107.2111957	76049.99745	-1.490525723	0.197604343	1.688130066	-0.26060977	0.334854281	-184.2511073	-1.766479492	0.657592773	2.424072266	-0.302344941	0.485332551	-213.7578735	1019.684143	1126.919312	107.2351685	1081.506295	24.82492775	764624.9506	0.500719249	0.676985204	0.176265955	0.56621542	0.033119624	400.314302	12.11	29.56	17.45	20.25	3.98	14315.08	1
241.6372528	288.0155945	46.37834167	264.6716591	13.74910086	186593.5197	-0.528694272	0.294700235	0.823394507	-0.095705446	0.156275509	-67.47233941	-0.970458984	0.582885742	1.553344727	-0.081549202	0.282593107	-57.4921875	1141.835815	1255.99646	114.1606445	1206.704826	28.35838718	850726.9025	0.414099425	0.624780655	0.21068123	0.525546466	0.045575318	370.5102587	16.88	27.74	10.86	21.08	3.10	14864.79	1
99.06848907	234.3512726	135.2827835	182.1696963	31.87967164	128065.2965	-0.831049085	0.49323523	1.324284315	-0.194639284	0.213362917	-136.8314163	-1.237426758	0.794555664	2.031982422	-0.233858762	0.320091696	-164.40271	1149.940674	1225.459595	75.5189209	1192.336826	19.3756131	838212.7888	0.469952762	0.638504982	0.16855222	0.542377302	0.027571138	381.291243	9.23	20.71	11.48	15.73	2.47	11060.49	1
0.09628763	359.980072	359.8837844	208.2001861	153.7253858	145531.93	-0.828912854	0.395399004	1.224311858	-0.18534302	0.21881177	-129.5547709	-1.098999023	0.4140625	1.513061523	-0.166917793	0.313653789	-116.6755371	1135.740234	1254.032715	118.2924805	1204.480888	28.78691056	841932.1406	0.375701129	0.621160507	0.245459378	0.527133437	0.05388615	368.4662728	15.20	29.00	13.80	21.98	3.04	15365.92	1
221.861145	249.4521942	27.59104919	228.6299417	5.458460412	160955.479	-0.260192901	0.150453374	0.410646275	-0.038630678	0.080157417	-27.19599746	-0.658203125	0.677734375	1.3359375	-0.063405297	0.26074587	-44.6373291	1209.051392	1317.480835	108.4294434	1263.77155	25.3480536	889695.171	0.398080319	0.591801226	0.193720907	0.503045958	0.05161748	354.1443546	13.40	26.84	13.44	19.80	3.63	13941.96	1
21.48881721	117.5714645	96.08264732	65.88481148	19.20306323	46580.56172	-1.206807733	0.628362775	1.835170507	-0.095818241	0.27930588	-67.74349644	-1.440429688	1.246337891	2.686767578	-0.125099452	0.412978791	-88.4453125	1097.014526	1175.241333	78.22680664	1141.580929	20.31783804	807097.7166	0.394721478	0.614339411	0.219617933	0.512101883	0.047319326	362.056031	9.70	24.59	14.89	16.33	3.29	11542.54	1
56.71630096	116.0400238	59.32372284	87.52874822	17.14197359	61882.82499	-0.422483981	0.287977725	0.710461706	-0.094485758	0.14012906	-66.80143093	-1.182983398	0.708618164	1.891601563	-0.087507839	0.308501978	-61.86804199	1202.81897	1318.17041	115.3514404	1265.937825	28.66406231	895018.042	0.406451941	0.619587719	0.213135779	0.512375159	0.050318619	362.2492373	13.94	30.64	16.71	21.93	3.78	15505.72	1
46.16918564	140.1654663	93.99628067	88.72721102	25.48397231	62641.41098	-0.756372213	0.555406213	1.311778426	0.003514348	0.307399688	2.481129442	-0.879516602	0.840454102	1.719970703	0.008843527	0.395141571	6.243530273	1074.467163	1162.779297	88.31213379	1120.630764	22.70267657	791165.3191	0.364271939	0.640868187	0.276596248	0.504195122	0.056604577	355.9617562	11.53	23.35	11.82	17.59	2.89	12417.49	1
196.2385712	284.306366	88.0677948	248.5007582	18.77752656	174696.033	-1.222274661	0.58731091	1.809585571	-0.154490506	0.240377896	-108.6068257	-1.487060547	0.862304688	2.349365234	-0.151158817	0.341690159	-106.2646484	1169.018799	1283.344116	114.3253174	1231.34972	27.1821993	865638.8529	0.453934491	0.62327832	0.169343829	0.544961591	0.047302919	383.1079984	14.56	28.67	14.11	20.66	3.08	14524.01	1
12.16461372	127.2118683	115.0472546	70.58809839	28.4798531	49905.78556	-0.942005694	0.920948267	1.862953961	-0.155878895	0.339282452	-110.2063786	-1.349121094	1.220336914	2.569458008	-0.18750259	0.456972431	-132.5643311	1092.429688	1190.0802	97.6505127	1147.008881	24.07893939	810935.2786	0.450687855	0.621658742	0.170970887	0.542055033	0.029075124	383.2329086	12.25	27.89	15.64	19.25	3.31	13610.14	1
83.68434906	149.9221497	66.2378006	122.9447819	13.203728	86553.12647	-0.646057129	0.250189215	0.896246344	-0.139230142	0.173504101	-98.01802018	-0.849487305	0.959594727	1.809082031	-0.090681249	0.363906067	-63.83959961	1158.284424	1281.485229	123.2008057	1230.105914	32.11502779	865994.5635	0.387576163	0.661627054	0.274050891	0.548506306	0.057417826	386.1484397	9.92	31.17	21.25	22.40	5.47	15767.85	1
223.6496277	336.770874	113.1212463	287.2373043	34.99388103	201927.825	-1.23043251	0.444784671	1.675217181	-0.206427118	0.357523698	-145.1182638	-1.546508789	0.68347168	2.229980469	-0.18528537	0.496375019	-130.2556152	1100.710938	1208.759399	108.0484619	1161.895199	27.81861279	816812.325	0.485295743	0.652179241	0.166883498	0.559810526	0.031620293	393.5467997	12.47	27.73	15.25	22.06	2.73	15504.76	1
177.485199	258.5328979	81.04769897	210.539726	20.68997798	148641.0466	-0.601128399	0.088968344	0.690096743	-0.170520591	0.103473947	-120.387537	-0.809204102	0.245239258	1.054443359	-0.254903388	0.214865595	-179.961792	1235.098755	1339.873169	104.7744141	1287.390493	27.54487189	908897.6882	0.430599034	0.549243808	0.118644774	0.484975526	0.025984519	342.3927213	12.66	27.24	14.58	20.65	3.29	14578.82	1
249.4128571	342.5018616	93.08900452	311.2093587	23.36121473	219402.5979	-1.324105859	0.902360797	2.226466656	-0.153902654	0.355723783	-108.5013709	-1.587280273	1.271484375	2.858764648	-0.106901215	0.498486273	-75.36535645	1132.458618	1264.010498	131.5518799	1207.248643	32.64040291	851110.2931	0.452300787	0.647587121	0.195286334	0.544097256	0.043681826	383.5885656	15.32	30.55	15.23	23.49	3.76	16559.18	1
251.0578461	326.9422913	75.88444519	283.0923601	22.13707083	200712.4833	-0.75078851	0.731537342	1.482325852	-0.104840704	0.242609342	-74.33205945	-1.158569336	0.97265625	2.131225586	-0.103266319	0.371865175	-73.21582031	1165.554688	1272.855347	107.3006592	1228.860253	28.1027029	871261.9192	0.42857343	0.642566681	0.213993251	0.541843371	0.045640019	384.16695	14.18	30.18	16.00	21.08	3.93	14948.17	1
143.1205292	309.6065979	166.4860687	192.3770943	62.04468785	135625.8515	-1.627190471	0.26810649	1.895296961	-0.142818969	0.325963486	-100.6873733	-1.817443848	0.586181641	2.403625488	-0.355671508	0.613474924	-250.7484131	937.4575195	1033.112793	95.65527344	980.3561575	23.17415128	691151.091	0.444557101	0.573862195	0.129305094	0.500064401	0.027740401	352.5454027	5.79	32.23	26.45	21.93	5.59	15460.45	1
25.15625954	91.90287781	66.74661827	62.42120593	18.87286101	44131.79259	-0.738660514	0.471032619	1.209693134	-0.099203213	0.247515811	-70.13667132	-1.063842773	0.747802734	1.811645508	-0.149732878	0.36643171	-105.861145	972.6937866	1097.942261	125.2484741	1042.684968	32.29807152	737178.2723	0.398966372	0.611199439	0.212233067	0.502810277	0.043024514	355.4868657	14.98	28.94	13.96	24.16	2.99	17078.65	1
290.5927429	339.2322693	48.63952637	311.7327017	11.53851277	218524.6239	-0.67415148	0.920688391	1.594839871	0.041908489	0.291925317	29.37785083	-0.841186523	1.116516113	1.957702637	0.074872549	0.327415575	52.48565674	922.9622803	1042.858398	119.8961182	987.0897818	30.70759419	691949.937	0.45558089	0.615547538	0.159966648	0.522829552	0.037020708	366.503516	18.05	26.72	8.66	22.74	1.61	15940.82	1
156.0151825	305.157074	149.1418915	197.662025	43.62896234	138956.4035	-1.204510093	0.458267301	1.662777394	-0.214450609	0.307737277	-150.7587779	-1.606323242	0.532592773	2.138916016	-0.359709434	0.451737456	-252.8757324	1002.536804	1102.008667	99.47186279	1049.389072	23.35494231	737720.5176	0.403959304	0.615863264	0.21190396	0.505474956	0.041653554	355.3488939	9.10	27.99	18.89	20.16	3.91	14173.99	1
89.76050568	214.7058716	124.9453659	148.1767218	38.57411498	104909.119	-1.128852963	0.418062925	1.546915889	-0.266112183	0.228012912	-188.4074252	-1.441345215	0.642089844	2.083435059	-0.409597537	0.345173222	-289.9950562	1001.42865	1108.949341	107.5206909	1057.073784	25.0320559	748408.2393	0.435891837	0.665647924	0.229756087	0.507797461	0.050592809	359.5206027	12.72	32.20	19.47	22.22	5.09	15729.70	1
243.7768402	320.2606201	76.48377991	288.7620358	18.61186467	203865.9973	-0.758159518	0.950411201	1.708570719	-0.089854296	0.303676447	-63.43713293	-1.321472168	1.27911377	2.600585938	-0.173283218	0.46137311	-122.3379517	952.2886963	1057.842041	105.5533447	1006.553352	27.34981797	710626.6664	0.371748626	0.579881668	0.208133042	0.491019499	0.051010746	346.6597666	4.99	29.39	24.40	21.00	3.42	14829.26	1
0.070626266	359.9139099	359.8432836	235.4960711	149.2327326	166260.2262	-1.141712189	0.124293119	1.266005307	-0.2243878	0.174100167	-158.4177869	-1.464599609	0.35559082	1.82019043	-0.177194223	0.259957481	-125.0991211	1046.027954	1171.454956	125.427002	1122.302983	30.52356224	792345.9059	0.408967227	0.630565226	0.221597999	0.552575386	0.052739675	390.1182224	14.84	32.12	17.28	22.57	4.34	15935.78	1
140.5325317	202.5031281	61.97059631	169.8027817	15.59546554	118861.9472	-0.324660838	0.181784138	0.506444976	-0.116857914	0.080340379	-81.80054009	-0.867553711	0.532714844	1.400268555	-0.189435861	0.314935949	-132.6051025	1107.352295	1217.514526	110.1622314	1157.208622	27.92005741	810046.0354	0.427670509	0.564797163	0.137126654	0.491716273	0.030247159	344.2013912	11.89	31.03	19.15	21.10	4.89	14772.02	1
231.3872528	307.336853	75.94960022	270.4705955	19.21360564	191222.711	-1.009764075	0.441348523	1.451112598	-0.112057319	0.276543956	-79.22452433	-1.248291016	0.603149414	1.85144043	-0.115913013	0.351004476	-81.95050049	996.8989258	1123.706299	126.807373	1067.029709	30.89496128	754390.0042	0.39890343	0.628346562	0.229443133	0.522474972	0.049010067	369.3898055	18.64	28.88	10.25	23.23	2.26	16421.89	1
22.32986259	137.4266052	115.0967426	83.56990203	27.99143214	59083.92073	-0.75658983	0.382279515	1.138869345	-0.240639327	0.187651378	-170.1320044	-1.070617676	0.697875977	1.768493652	-0.268984955	0.299579193	-190.1723633	990.5452271	1103.30896	112.7637329	1051.028451	27.17642603	743077.1149	0.448188126	0.607940793	0.159752667	0.540898757	0.0282685	382.4154215	16.45	26.42	9.97	21.14	2.17	14944.92	1
221.4335327	342.1164856	120.6829529	304.787872	23.55620688	214570.6619	-1.48713851	0.693696976	2.180835485	-0.191851185	0.346716203	-135.0632346	-1.881652832	0.99206543	2.873718262	-0.229511694	0.469430662	-161.5762329	998.9439087	1115.329224	116.3853149	1061.735578	27.81898541	747461.847	0.426040918	0.654676259	0.228635341	0.548281189	0.052652972	385.9899569	14.81	28.51	13.71	21.16	2.52	14894.95	1
77.11683655	155.9653473	78.84851074	119.5170155	20.45793769	84379.01291	-0.77335012	0.572636068	1.345986187	-0.096155318	0.289409714	-67.88565433	-1.602722168	0.97277832	2.575500488	-0.147816861	0.474220621	-104.3587036	1000.588257	1104.438477	103.8502197	1058.04325	26.68738417	746978.5347	0.438842416	0.573396027	0.134553611	0.514192419	0.034356369	363.0198478	9.46	30.29	20.82	21.11	4.31	14902.75	1
94.40330505	202.0936432	107.6903381	139.2260671	29.98195692	98015.15125	-1.277847171	0.125011191	1.402858362	-0.2594377	0.23207343	-182.6441405	-1.739746094	0.630615234	2.370361328	-0.250778198	0.421627907	-176.5478516	1009.387085	1130.473755	121.0866699	1078.381138	27.33715884	759180.3211	0.457015842	0.668306708	0.211290866	0.557098523	0.047137503	392.1973599	13.74	29.33	15.59	22.00	4.21	15491.02	1
282.983429	319.8168335	36.83340454	302.5691995	8.520177318	213916.4241	-0.565645993	0.444836169	1.010482162	-0.027868858	0.163317105	-19.70328241	-1.09753418	0.952270508	2.049804688	-0.106385918	0.353454492	-75.21484375	1184.645142	1297.962891	113.317749	1237.169762	26.96997937	874679.0216	0.361278802	0.606886148	0.245607346	0.476633509	0.060903871	336.9798907	10.79	32.15	21.36	20.97	4.25	14825.71	1
0.075507499	359.9970093	359.9215018	65.17265098	119.1745731	45816.37364	-0.55342859	0.444828659	0.99825725	-0.136818762	0.136572093	-96.18359003	-0.807373047	1.261962891	2.069335938	-0.050342978	0.276268341	-35.39111328	1311.831421	1457.022827	145.1914063	1393.444782	39.7803846	979591.682	0.473088205	0.678229153	0.205140948	0.552697625	0.051502216	388.5464306	12.20	32.56	20.35	27.37	3.76	19240.60	1
109.8211212	167.0193024	57.19818115	133.0387169	13.76838351	94058.37286	-0.925385714	0.515709102	1.441094816	-0.136610068	0.189254846	-96.58331798	-1.053344727	0.684082031	1.737426758	-0.251165452	0.310244144	-177.5739746	1209.58667	1360.384644	150.7979736	1280.641476	35.04832402	905413.5237	0.3992742	0.606049597	0.206775397	0.485744146	0.061888642	343.4211113	17.11	38.08	20.97	26.32	5.95	18604.77	1
282.1230774	323.7466736	41.62359619	302.1576098	7.67038152	212416.7997	-0.580016017	0.445337534	1.025353551	-0.046356381	0.192034796	-32.58853603	-0.9140625	0.640991211	1.555053711	-0.189543592	0.268018843	-133.2491455	1213.259521	1375.82373	162.564209	1288.608349	42.24720235	905891.6693	0.39860642	0.538244724	0.139638305	0.461654444	0.030472644	324.5430741	18.18	38.25	20.07	29.54	4.78	20768.84	1
268.2843018	314.9877625	46.70346069	296.8063987	10.11214047	208654.8983	-0.477306575	0.24101454	0.718321115	-0.107493926	0.123011237	-75.56823003	-0.725463867	0.494995117	1.220458984	-0.207627537	0.24872599	-145.9621582	1218.326904	1364.714111	146.387207	1287.012529	35.93310082	904769.808	0.421364158	0.568854094	0.147489935	0.481927941	0.042256273	338.7953424	18.40	35.10	16.70	26.46	5.08	18601.61	1
143.2826385	197.4846954	54.20205688	176.7675807	11.19528926	124090.8416	-0.684000552	0.339458346	1.023458898	-0.117249939	0.203798851	-82.30945735	-1.125854492	0.430053711	1.555908203	-0.270007707	0.324361281	-189.5454102	1221.517578	1376.590576	155.072998	1286.545892	38.02718036	903155.2163	0.403694272	0.58162117	0.177926898	0.465192914	0.039488642	326.5654255	16.52	38.82	22.30	27.22	6.42	19109.96	1
143.3662567	171.7685242	28.40226746	155.9523934	4.614662031	110102.3897	-0.353989482	0.442670107	0.796659589	0.011595891	0.126505274	8.186699087	-0.754760742	0.85168457	1.606445313	0.084133591	0.316644015	59.39831543	1097.990356	1215.719116	117.7287598	1164.317401	27.05873836	822008.0854	0.379936576	0.632820368	0.252883792	0.516585555	0.069174702	364.709402	12.19	31.75	19.56	20.77	4.96	14660.76	1
0.074044302	359.9623413	359.888297	330.7994239	68.40758756	233544.3933	-0.446827143	0.459667236	0.906494379	0.042431081	0.162954264	29.95634348	-1.476806641	0.859130859	2.3359375	0.020943877	0.400139803	14.78637695	1063.27002	1184.64978	121.3797607	1127.037853	34.39887894	795688.7242	0.287278771	0.617645979	0.330367208	0.488624992	0.093367172	344.9692441	7.46	32.67	25.21	23.98	5.20	16928.18	1
197.8853149	326.0062561	128.1209412	301.3937676	23.25910632	210975.6373	-1.382104039	0.49510178	1.877205819	-0.183249431	0.336091079	-128.2746018	-1.851196289	1.174194336	3.025390625	-0.237090716	0.611399835	-165.963501	1094.210449	1223.779785	129.5693359	1158.212383	32.15411156	810748.668	0.383421153	0.62094152	0.237520367	0.504498477	0.043258918	353.1489337	9.95	32.86	22.91	23.83	4.55	16680.02	1
0.009825299	359.9338989	359.9240736	69.88840199	113.2031976	49480.98861	-0.991401494	0.553914666	1.54531616	-0.01232501	0.332169595	-8.726107426	-1.523803711	1.16796875	2.691772461	-0.043051165	0.607769529	-30.48022461	1062.083984	1187.318604	125.2346191	1123.367287	35.45888287	795344.0392	0.291515738	0.651206672	0.359690934	0.492668782	0.086140008	348.8094975	1.08	35.04	33.96	23.79	6.52	16840.59	1
0.018029608	359.9868164	359.9687868	321.4129163	56.8996656	227238.9318	-0.620945156	0.477285981	1.098231137	-0.148520809	0.166182198	-105.004212	-1.636230469	1.171020508	2.807250977	-0.300831149	0.404862241	-212.6876221	1151.032349	1270.149658	119.1173096	1198.387504	34.91740687	847259.9656	0.260875732	0.607776105	0.346900374	0.433299778	0.103389377	306.3429432	3.80	39.79	35.99	23.98	9.40	16953.76	1
189.7168579	244.2322388	54.51538086	218.111103	9.550073632	154204.5498	-0.536725879	0.406634688	0.943360567	-0.070661967	0.140321901	-49.95801064	-2.329223633	1.591918945	3.921142578	-0.039209779	0.565578047	-27.72131348	1185.293213	1311.89502	126.6018066	1259.687588	31.0876456	890599.1245	0.266862273	0.716546237	0.449683964	0.518005528	0.101963662	366.229908	9.25	37.93	28.68	22.23	7.54	15713.13	1
242.6553802	318.0734558	75.41807556	277.9275562	21.68228011	196494.7823	-0.864003778	0.29184705	1.155850828	-0.157485886	0.219566225	-111.3425214	-1.695678711	0.633789063	2.329467773	-0.266919256	0.38483787	-188.7119141	1235.684082	1372.495361	136.8112793	1300.227461	32.66451824	919260.8151	0.374960512	0.617744803	0.242784292	0.48239325	0.06207459	341.052028	10.02	36.24	26.22	25.59	6.98	18094.61	1
252.4124451	302.0917358	49.67929077	280.514791	8.022020751	196079.8389	-0.589316189	0.648608863	1.237925053	-0.00636201	0.170945153	-4.447044755	-0.879272461	0.938598633	1.817871094	0.021827709	0.309909785	15.25756836	1078.154785	1201.392212	123.2374268	1143.992127	34.57162129	799650.4967	0.328586191	0.589570165	0.260983974	0.502480126	0.066760831	351.2336082	13.45	30.71	17.27	24.16	4.52	16884.75	1
144.1942902	191.373703	47.17941284	163.2052454	9.066292674	115222.9032	-0.731814802	0.490122318	1.22193712	-0.014931409	0.189623678	-10.54157462	-1.331665039	1.246337891	2.57800293	-0.000671387	0.42894062	-0.473999023	1031.065186	1150.58313	119.5179443	1097.488211	31.21103479	774826.6768	0.344392478	0.628757775	0.284365296	0.514408709	0.066551434	363.1725487	8.63	31.13	22.50	21.81	5.73	15395.56	1
218.2337646	294.3598938	76.12612915	255.7702853	12.31795523	180573.8215	-0.385271639	0.624813616	1.010085255	0.064957201	0.204504773	45.85978373	-0.868774414	1.292602539	2.161376953	0.199208549	0.424170379	140.6412354	1016.311951	1125.746094	109.4341431	1085.756556	30.32520139	766544.1287	0.273215026	0.70847398	0.435258955	0.537683564	0.111897047	379.6045965	3.56	32.75	29.19	20.88	8.16	14739.19	1
241.7542877	282.5003357	40.74604797	262.2267724	9.455502276	185918.7816	-0.49149406	0.253202826	0.744696885	-0.113356921	0.123117077	-80.37005731	-0.950073242	0.761230469	1.711303711	-0.029302815	0.339054857	-20.7756958	984.7734375	1133.680176	148.9067383	1070.506675	41.2208387	758989.2327	0.251247168	0.691620111	0.440372944	0.517437159	0.106142972	366.8629456	13.97	35.38	21.41	27.33	5.77	19374.31	1
0.635765076	359.5884705	358.9527054	33.67972136	55.29801962	23643.1644	-1.263585925	0.569744527	1.833330452	-0.017118277	0.232150553	-12.01703077	-1.566101074	0.892211914	2.458312988	-0.007685039	0.538300006	-5.394897461	990.1535034	1124.332642	134.1791382	1061.326259	40.13950432	745051.0338	0.286287367	0.710509837	0.424222469	0.505654803	0.122313572	354.9696721	4.01	34.09	30.08	25.31	7.31	17768.93	1
0.180890024	359.9631653	359.7822753	165.3838741	158.2037287	116761.0151	-0.800430119	0.695150375	1.495580494	-0.189100316	0.217986161	-133.504823	-2.711669922	1.666992188	4.378662109	-0.271078915	0.513293285	-191.3817139	1104.682373	1233.549438	128.8670654	1164.140334	33.81478756	821883.0758	0.307324439	0.693025649	0.385701209	0.496970449	0.072686753	350.8611373	4.64	43.76	39.13	24.93	8.27	17602.38	1
1.42457068	359.0135803	357.5890096	35.49677079	52.42140704	24989.72663	-1.405596972	0.476937592	1.882534564	0.030756786	0.197628938	21.65277754	-1.802429199	1.348510742	3.150939941	-0.059805697	0.607405331	-42.10321045	1008.991943	1143.356323	134.3643799	1073.751143	40.38382887	755920.8048	0.320947468	0.685112119	0.36416465	0.47350667	0.090783628	333.3486957	1.43	36.32	34.89	26.10	7.71	18374.51	1
79.06171417	130.2075195	51.14580536	107.6655588	11.46931483	76227.21565	-0.349617004	0.705095232	1.054712236	0.10087918	0.181597516	71.42245921	-0.781616211	1.109863281	1.891479492	0.087906142	0.355279921	62.23754883	983.0061035	1099.368164	116.3620605	1037.836722	33.57989124	734788.3992	0.195577651	0.67428565	0.478707999	0.451036805	0.122502669	319.3340583	13.06	31.64	18.58	23.46	3.94	16607.76	1
0.030231154	359.8926392	359.862408	218.4279689	139.4531722	153991.7181	-1.216001034	0.626113236	1.84211427	-0.204844117	0.298847052	-144.4151024	-1.325683594	0.998535156	2.32421875	-0.251557825	0.431411638	-177.3482666	1130.182739	1225.629883	95.44714355	1184.648731	22.87569643	835177.3553	0.453896821	0.613789022	0.159892201	0.532022665	0.028214185	375.0759788	12.93	34.04	21.10	20.44	5.00	14413.06	1
0.22260201	359.9606628	359.7380608	169.8207841	147.7479738	119893.4736	-0.836410165	0.420598745	1.25700891	-0.2056504	0.209605115	-145.1891825	-1.129516602	0.700683594	1.830200195	-0.217319045	0.294884035	-153.4272461	1145.888794	1251.249023	105.3602295	1205.230823	24.52210422	850892.9612	0.409868985	0.631007671	0.221138686	0.512152714	0.048313027	361.5798162	13.97	33.04	19.07	20.75	3.49	14649.39	1
226.2115021	295.8246155	69.6131134	260.885795	19.51844349	183141.8281	-0.86372894	1.329128027	2.192856967	-0.045328192	0.468908986	-31.82039089	-1.144165039	1.457275391	2.60144043	0.107018104	0.591482688	75.12670898	1258.368652	1425.832275	167.463623	1357.758104	44.55107014	953146.1892	0.433978945	0.737528205	0.30354926	0.571076117	0.073466509	400.8954339	12.36	38.67	26.31	30.56	5.54	21452.55	1
225.8846588	277.4777527	51.59309387	247.9070744	15.29954174	174278.6733	-0.595600486	0.494897187	1.090497673	-0.145490259	0.228389682	-102.2796518	-0.785400391	0.75	1.535400391	0.030928936	0.364324497	21.74304199	1273.077271	1438.24585	165.1685791	1372.968648	44.15506525	965196.9594	0.483040065	0.806349576	0.323309511	0.605848297	0.084203826	425.9113525	11.86	37.81	25.95	29.73	6.00	20899.81	1
105.4759293	136.3548737	30.8789444	120.6365926	7.655405921	85410.70757	-0.389662653	0.395609319	0.785271972	-0.033291923	0.125721569	-23.57068158	-0.858642578	0.931396484	1.790039063	-0.074641168	0.310968357	-52.84594727	1086.701782	1223.633667	136.9318848	1151.717314	34.66763274	815415.8585	0.407870799	0.60355854	0.195687741	0.483794036	0.029152056	342.5261777	16.11	29.85	13.74	24.68	3.27	17471.33	1
100.5520554	158.7431946	58.19113922	130.0865926	11.77491784	91320.78797	-0.411462814	0.471706599	0.883169413	-0.000558642	0.139999636	-0.39216636	-0.913452148	0.898803711	1.812255859	0.122732309	0.319640755	86.15808105	1112.297852	1185.579834	73.28198242	1155.999742	20.68319912	811511.8191	0.422894925	0.755814791	0.332919866	0.597864653	0.069145971	419.7009862	2.59	25.69	23.10	15.25	4.96	10707.78	1
42.47875977	75.78974915	33.31098938	61.53293247	9.153511153	43319.18446	-0.262955487	0.454420209	0.717375696	0.058820348	0.120506701	41.40952475	-1.289978027	0.875427246	2.165405273	-0.087143204	0.395378895	-61.34881592	977.3618164	1130.474243	153.1124268	1044.038813	39.35507209	735003.3243	0.246228591	0.516835392	0.270606801	0.429104239	0.062279224	302.089384	8.63	35.10	26.47	27.00	5.19	19009.66	1
81.82250214	181.8630524	100.0405502	142.1213253	19.13150571	100621.8983	-1.072759748	0.569204926	1.641964674	-0.191228367	0.315209416	-135.3896837	-1.390136719	1.012207031	2.40234375	-0.195136119	0.438172868	-138.1563721	1260.953369	1394.91394	133.9605713	1327.577534	32.00692283	939924.8938	0.438895375	0.638538361	0.199642986	0.539861173	0.039080744	382.2217101	14.98	32.27	17.29	24.34	3.62	17235.73	1
89.90079498	161.7369232	71.83612823	119.0794236	19.68051296	84189.15247	-0.626908422	0.721991479	1.348899901	-0.127366603	0.231307054	-90.04818842	-0.88293457	0.848022461	1.730957031	-0.216820184	0.313645028	-153.2918701	1243.365601	1379.012207	135.6466064	1303.6603	34.26873483	921687.8322	0.412210405	0.561921656	0.149711251	0.487595343	0.03419042	344.7299073	12.69	31.70	19.01	24.67	5.31	17445.13	1
134.2080383	276.5084839	142.3004456	212.9321612	41.23428922	149691.3093	-1.471042871	0.407093167	1.878136039	-0.282362594	0.294806591	-198.5009036	-1.597106934	1.074707031	2.671813965	-0.23888674	0.431420257	-167.9373779	1020.468811	1129.663696	109.1948853	1086.846156	25.64491258	764052.8477	0.469579756	0.670605659	0.201025903	0.572777328	0.037292635	402.6624613	9.12	31.29	22.18	21.37	3.65	15022.94	1
267.9474487	320.3447876	52.39733887	300.4177264	11.38874416	209991.9908	-0.892773628	0.430922002	1.32369563	-0.073370107	0.246187898	-51.28570495	-1.326293945	0.729492188	2.055786133	-0.052245395	0.375714046	-36.51953125	1018.680115	1153.36499	134.6848755	1095.750533	34.97975124	765929.6224	0.446405917	0.593132854	0.146726936	0.528864946	0.029722018	369.6765971	15.35	30.73	15.38	25.18	3.95	17598.69	1
202.3771362	248.5104218	46.13328552	228.7868127	12.88433856	161752.2766	-0.388198018	0.644974887	1.033172905	-0.060252129	0.135459209	-42.59825506	-0.689086914	0.767333984	1.456420898	-0.111058431	0.258284445	-78.51831055	1100.363281	1193.938965	93.57568359	1143.403117	22.50088807	808386.0038	0.3891626	0.6405797	0.2514171	0.504164402	0.063568221	356.4442323	10.29	25.83	15.54	17.83	4.25	12605.13	1
102.4284744	149.8365784	47.40810394	129.671371	10.19230158	91807.33067	-0.458305776	0.365014911	0.823320687	-0.078934321	0.10388308	-55.88549903	-0.91027832	0.638793945	1.549072266	-0.048611743	0.275317459	-34.41711426	1178.530273	1287.588257	109.0579834	1240.493042	25.911741	878269.074	0.415826768	0.621447265	0.205620497	0.54255949	0.054613732	384.1321191	12.04	29.16	17.12	19.63	4.77	13898.15	1
0.244178221	359.5882263	359.3440481	169.9947214	131.6435988	120016.2733	-1.600019932	0.394094825	1.994114757	-0.285044454	0.374939014	-201.2413843	-1.706970215	0.651123047	2.358093262	-0.354310292	0.556737416	-250.1430664	936.8666382	1042.091675	105.2250366	996.3257115	25.33895855	703405.9523	0.419506729	0.634381056	0.214874327	0.529090919	0.03577969	373.5381886	12.20	32.17	19.97	23.93	4.06	16897.07	1
279.023407	356.8877869	77.86437988	307.3579029	19.1268469	215457.8899	-1.158351302	0.757096112	1.915447414	-0.144990389	0.248924525	-101.6382624	-1.083862305	0.931030273	2.014892578	-0.13024676	0.342001711	-91.30297852	1131.233643	1262.519897	131.2862549	1203.848206	31.26254204	843897.5922	0.432309479	0.621739089	0.189429611	0.534642213	0.051416226	374.7841915	15.89	28.71	12.82	23.08	3.39	16177.73	1
139.5421448	239.1945038	99.65235901	194.2245813	21.61927172	136928.3298	-0.924535394	0.801173449	1.725708842	-0.142834388	0.252745862	-100.6982435	-1.371459961	0.898803711	2.270263672	-0.192387661	0.344004759	-135.6333008	1197.574951	1307.668945	110.0939941	1254.762629	27.84505509	884607.6537	0.397970021	0.57499665	0.177026629	0.492876634	0.03480177	347.4780267	13.93	31.83	17.90	21.46	3.50	15126.88	1
112.5629654	170.870697	58.30773163	136.1010086	12.61339179	96087.31205	-0.496725708	0.292805046	0.789530754	-0.076696147	0.135975602	-54.1474801	-0.893188477	0.740234375	1.633422852	-0.033678611	0.270905537	-23.77709961	1230.111938	1343.330444	113.2185059	1288.10313	28.92601512	909400.8099	0.416341811	0.684009194	0.267667383	0.528831088	0.044923398	373.3547482	11.71	31.31	19.60	21.30	3.84	15035.26	1
179.9876404	223.910141	43.92250061	202.5940358	5.712505959	142221.0132	-0.309084088	0.789539933	1.098624021	0.021609196	0.146873831	15.16965591	-0.965026855	1.399414063	2.364440918	-0.00438175	0.315320101	-3.07598877	1007.705566	1119.051025	111.345459	1062.595367	29.19221129	745941.9476	0.288310707	0.572790146	0.284479439	0.477201261	0.056131295	334.9952855	9.95	29.15	19.20	21.57	2.46	15144.82	1
0.970557511	359.9836426	359.0130851	49.13443617	69.0070492	34541.50862	-0.26633817	0.544553518	0.810891688	0.070368626	0.138095167	49.46914442	-1.173217773	1.302978516	2.476196289	-0.090114371	0.391101502	-63.35040283	984.0750732	1076.347168	92.27209473	1015.681688	24.94383434	714024.2266	0.25046435	0.511833668	0.261369318	0.391343331	0.055243795	275.1143617	0.77	31.37	30.59	17.29	7.66	12157.98	1
179.2732849	255.2782288	76.00494385	221.2399126	22.50545606	156637.8582	-0.528153896	0.164442524	0.692596421	-0.163722003	0.128651542	-115.9151785	-0.748779297	0.494873047	1.243652344	-0.226608363	0.199715853	-160.4387207	1087.495972	1193.681519	106.1855469	1143.715388	26.11003525	809750.4945	0.393985063	0.578189373	0.18420431	0.495226531	0.040757844	350.6203837	15.70	27.08	11.38	20.60	2.36	14583.40	1
94.2580719	171.0697327	76.81166077	132.2867205	21.46062744	92600.70432	-0.612453938	0.772517204	1.384971142	-0.087005291	0.28099008	-60.90370355	-1.055358887	1.511474609	2.566833496	-0.08008885	0.46971157	-56.06219482	1005.79187	1131.918945	126.1270752	1073.173056	31.42995643	751221.1389	0.28142786	0.661198199	0.379770339	0.511586546	0.069230601	358.1105823	14.14	34.61	20.47	23.97	3.59	16779.88	1
80.90187073	154.9086304	74.00675964	116.6966413	11.64182477	82504.52538	-0.335438818	0.985242426	1.320681244	0.120687005	0.20025469	85.32571223	-1.585388184	1.679443359	3.264831543	-0.044788064	0.428087678	-31.66516113	967.3493652	1074.671753	107.3223877	1002.82367	27.71703324	708996.3346	0.192033321	0.531891465	0.339858145	0.350760786	0.077207851	247.987876	2.12	34.53	32.41	19.11	8.19	13510.42	1
224.9449158	318.986908	94.04199219	273.4693777	15.7979492	192795.9113	-1.063785791	0.672597647	1.736383438	-0.11146847	0.307947696	-78.58527165	-1.30645752	1.207092285	2.513549805	-0.160680113	0.476955825	-113.27948	961.6345215	1075.676636	114.0421143	1018.250693	26.1485702	717866.7386	0.415292829	0.615650833	0.200358003	0.515066265	0.046318563	363.1217167	9.09	28.44	19.34	19.90	3.82	14026.47	1
0.790703833	359.4132996	358.6225957	309.181441	37.90408527	217354.553	-0.315005451	0.522774816	0.837780267	0.057819459	0.128015859	40.64707949	-0.550170898	0.703735352	1.25390625	0.169508086	0.206312681	119.1641846	928.1039429	1049.465332	121.3613892	997.4452708	30.84306553	701204.0254	0.343568355	0.610849738	0.267281383	0.517570627	0.053243055	363.8521507	9.19	31.23	22.04	21.92	5.19	15412.51	1
23.85112762	68.55410004	44.70297241	51.02445378	10.53873198	35972.23991	-0.226908982	0.313777477	0.540686458	0.071664474	0.106120008	50.52345416	-0.83190918	1.233032227	2.064941406	0.020493874	0.340962702	14.44818115	898.616333	1013.812683	115.1963501	946.9377907	27.02194446	667591.1425	0.352219373	0.535906255	0.183686882	0.441829147	0.041093797	311.4895484	7.80	29.57	21.76	20.01	5.66	14108.17	1
0.790577471	359.7944031	359.0038256	69.39602571	70.13599895	48993.59415	-0.371807098	1.034559727	1.406366825	0.127890051	0.32456289	90.29037623	-0.5	1.440429688	1.940429688	0.175185249	0.361984126	123.6807861	1173.944702	1282.10376	108.1590576	1228.956832	24.14903494	867643.5236	0.351362586	0.593756437	0.242393851	0.492008528	0.057514894	347.3580208	5.42	25.74	20.32	17.82	3.31	12578.05	1
0.091756694	359.8725586	359.7808019	59.87868189	100.6239247	42094.71337	-0.522503078	1.036836624	1.559339702	-0.019964578	0.244867631	-14.03509823	-0.782836914	1.26574707	2.048583984	0.070275862	0.351969701	49.40393066	1170.156128	1287.933105	117.7769775	1234.305209	28.1955541	867716.5618	0.423039615	0.640761912	0.217722297	0.528092557	0.044108406	371.2490675	1.60	27.73	26.13	20.78	3.91	14610.57	1
6.364768028	104.6995316	98.33476353	54.90488558	29.8064925	38653.03945	-0.833005667	0.587181926	1.420187593	-0.12103209	0.30195011	-85.20659115	-1.051879883	0.93359375	1.985473633	-0.172285774	0.36834158	-121.2891846	1067.401733	1171.170898	103.769165	1122.351152	26.34827315	790135.2111	0.399777263	0.637014627	0.237237364	0.50918677	0.05377341	358.4674861	13.71	27.77	14.07	21.49	2.83	15128.83	1
0.122351237	359.6371765	359.5148253	93.64704769	88.53983827	65833.87452	-0.383793652	0.987171769	1.370965421	0.072493673	0.244376182	50.96305188	-0.681396484	1.505493164	2.186889648	0.391640111	0.347089798	275.322998	1128.998779	1207.948242	78.94946289	1185.864911	19.68512893	833663.0322	0.428975463	0.765730381	0.336754918	0.643267386	0.071267586	452.2169722	0.49	32.74	32.24	17.16	8.83	12060.81	1
103.2883377	238.2846527	134.996315	176.6764908	30.97180679	124910.279	-1.631130338	1.049465775	2.680596113	0.073831509	0.389789889	52.19887707	-2.026367188	2.106018066	4.132385254	-0.046229512	0.706252773	-32.68426514	902.5877686	996.0147095	93.42694092	944.4477042	24.79928502	667724.5269	0.207857713	0.624080241	0.416222528	0.427826779	0.096267607	302.4735328	5.70	32.65	26.94	18.20	6.20	12865.29	1
78.60452271	168.8316345	90.22711182	124.7728718	8.755294831	88089.64747	-0.235193342	1.33431828	1.569511622	0.101279985	0.277692939	71.50366951	-0.894165039	1.400878906	2.295043945	0.079672492	0.461876412	56.2487793	1165.198486	1277.570679	112.3721924	1216.800496	27.87102075	859061.1505	0.348554313	0.678473532	0.329919219	0.474713563	0.061671164	335.1477754	13.13	30.14	17.01	20.14	4.30	14216.59	1
73.24736023	112.4507446	39.2033844	94.01199782	10.92329239	66372.47046	-0.483465821	0.239298642	0.722764462	-0.064090732	0.14952468	-45.24805712	-0.829589844	0.653930664	1.483520508	-0.090636515	0.31157467	-63.98937988	1031.266968	1172.293945	141.0269775	1107.411123	37.54154002	781832.2527	0.325344473	0.585778117	0.260433644	0.505127729	0.063641835	356.6201765	18.48	32.89	14.41	26.53	3.50	18732.27	1
66.56874084	191.9092102	125.3404694	129.3994909	23.04408807	91485.4401	-0.814449012	1.091046572	1.905495584	-0.047949654	0.336365833	-33.90040504	-1.139770508	1.050415039	2.190185547	-0.033782398	0.44701529	-23.88415527	1189.568726	1322.989258	133.4205322	1260.566785	30.03631395	891220.7169	0.358258963	0.628744364	0.270485401	0.525037055	0.058733241	371.201198	9.48	31.89	22.41	22.57	4.71	15955.03	1
46.06826782	110.1714172	64.10314941	85.37469938	17.29585861	60274.53777	-0.83646524	0.361168563	1.197633803	-0.154053672	0.211709155	-108.7618927	-1.200439453	0.841918945	2.042358398	-0.119524126	0.370037359	-84.3840332	1147.260254	1280.012207	132.7519531	1220.906067	34.44656266	861959.6836	0.432132244	0.618150234	0.18601799	0.538638668	0.04128658	380.2788994	15.80	31.12	15.32	24.68	3.48	17426.17	1
190.8599091	237.6384735	46.77856445	206.9634375	11.12327243	146944.0406	-0.462096363	0.275392532	0.737488896	-0.094321506	0.119790408	-66.96826911	-0.960327148	0.558227539	1.518554688	-0.118065719	0.284954975	-83.82666016	1231.608765	1341.364136	109.7553711	1288.409787	24.38864422	914770.9486	0.414962411	0.633150816	0.218188405	0.517762212	0.074558274	367.6111705	12.96	30.08	17.13	19.52	4.23	13862.33	1
0.054260634	359.855011	359.8007504	256.2201357	133.0284504	181147.636	-1.193773985	1.183711171	2.377485156	-0.101395068	0.430880917	-71.68631335	-1.406860352	1.108642578	2.51550293	-0.091127992	0.576847699	-64.42749023	1038.468506	1181.331787	142.8632813	1118.537466	31.63328843	790805.9885	0.367924303	0.660934865	0.293010563	0.528039134	0.063640397	373.3236678	12.31	33.22	20.91	24.41	4.51	17260.80	1
184.4857178	251.9716034	67.48588562	205.2221236	18.03323448	144886.8193	-0.908896804	0.263244689	1.172141492	-0.172014343	0.227883932	-121.4421264	-1.373168945	0.633300781	2.006469727	-0.176221637	0.343513175	-124.4124756	1104.188599	1245.242554	141.0539551	1179.953269	33.21559857	833047.0079	0.441240519	0.616090238	0.174849719	0.533281026	0.038086265	376.4964045	17.62	30.82	13.20	24.79	3.14	17504.97	1
0.008720867	359.8293152	359.8205943	64.00169422	71.49476822	45313.19951	-1.519084573	0.895827889	2.414912462	-0.174107604	0.390703288	-123.2681834	-1.780029297	1.130004883	2.91003418	-0.234801212	0.593943582	-166.2392578	1052.218506	1168.848633	116.630127	1113.343924	32.41298835	788247.4984	0.419405967	0.59785378	0.178447813	0.509461076	0.041213087	360.6984418	6.39	29.81	23.42	23.31	4.41	16504.47	1
52.07170486	173.1572876	121.0855827	107.0051298	43.83692515	75117.60113	-1.30180943	0.657202721	1.959012151	-0.168901793	0.423515156	-118.5690587	-1.608093262	0.829223633	2.437316895	-0.189087001	0.576552651	-132.7390747	987.4460449	1089.971313	102.5252686	1044.129922	25.60451695	732979.2054	0.423971832	0.625736892	0.20176506	0.532959894	0.040774955	374.1378458	12.52	29.90	17.39	22.52	3.62	15806.60	1
3.053096771	358.7485657	355.6954689	301.3648375	32.48700584	211558.1159	-0.692501664	0.523131132	1.215632796	-0.152918152	0.19443769	-107.3485428	-1.091918945	0.802124023	1.894042969	-0.172084189	0.363416729	-120.8031006	1070.191284	1175.763672	105.5723877	1123.258598	29.19875911	788527.5361	0.419302344	0.593031406	0.173729062	0.510706944	0.034392018	358.5162747	11.96	28.36	16.40	21.26	4.55	14927.42	1
37.13993073	95.54688263	58.4069519	69.67069902	11.37939311	49326.8549	-0.405129582	0.609820187	1.014949769	0.093764781	0.185045998	66.38546474	-0.938354492	0.807495117	1.745849609	0.026690208	0.393804616	18.89666748	1010.252441	1113.500732	103.248291	1046.362712	26.86966534	740824.7999	0.297801942	0.625798225	0.327996284	0.425986871	0.062051531	301.5987047	2.90	27.74	24.84	18.54	7.37	13123.22	1
196.7414703	286.1982422	89.45677185	242.7195594	20.16302695	171602.7285	-0.383969933	0.416076064	0.800045997	0.08787632	0.17174573	62.12855818	-0.671203613	0.562255859	1.233459473	0.084813573	0.250535974	59.9631958	958.567627	1041.798828	83.23120117	998.4854441	19.68593603	705929.209	0.388357729	0.602541625	0.214183897	0.475280053	0.037156822	336.0229973	6.15	21.92	15.78	14.73	3.81	10410.70	1
284.3144531	355.4105225	71.09606934	320.2141466	19.81431782	224790.3309	-0.794166028	0.709363401	1.503529429	-0.104036594	0.274638716	-73.03368873	-1.187255859	0.901245117	2.088500977	-0.082266001	0.421866296	-57.75073242	1115.569946	1241.106689	125.5367432	1181.356101	30.54268067	829311.983	0.353478134	0.674711883	0.321233749	0.538917411	0.04995918	378.3200227	11.46	32.12	20.66	23.48	4.42	16485.71	1
141.7036896	270.8746338	129.1709442	199.5133687	28.31996523	141255.465	-1.288798571	0.672439456	1.961238027	-0.210953394	0.26072261	-149.3550031	-1.747436523	0.69152832	2.438964844	-0.105116763	0.323597846	-74.42266846	1024.209839	1139.429199	115.2193604	1095.166096	25.87433535	775377.5961	0.48881036	0.670153916	0.181343555	0.580097522	0.042205364	410.7090454	3.04	30.96	27.92	19.72	4.63	13964.96	1
85.16107178	311.3746948	226.213623	265.3256166	30.18564935	188115.8621	-0.502957106	0.91011703	1.413074136	-0.022097063	0.197338619	-15.66681756	-0.598144531	0.933349609	1.531494141	0.12908221	0.339061579	91.51928711	1048.117432	1145.079346	96.96191406	1103.147322	26.74062232	782131.4513	0.478284448	0.655689418	0.17740497	0.567960779	0.034390234	402.6841926	0.32	27.44	27.12	19.30	5.02	13684.39	1
0.107181095	359.8497314	359.7425504	194.3916682	141.7382077	136657.3428	-0.698285222	0.046917792	0.745203014	-0.279634689	0.174775269	-196.5831861	-1.954467773	0.560180664	2.514648438	-0.424946553	0.377904714	-298.7374268	1052.24231	1148.417114	96.17480469	1102.591588	26.81566344	775121.8861	0.212580055	0.581923187	0.369343132	0.47312795	0.072718437	332.6089489	3.64	38.08	34.44	22.42	5.92	15762.95	1
147.0762024	202.1055603	55.02935791	170.4094346	11.60408487	119286.6042	-0.108210929	0.507555783	0.615766712	0.117839494	0.129012154	82.48764578	-0.863342285	0.812255859	1.675598145	-0.042711792	0.36608674	-29.89825439	868.432312	1000.235901	131.8035889	919.9071019	35.83813701	643934.9713	0.2109005	0.519834936	0.308934435	0.387925969	0.089548733	271.548178	3.75	32.22	28.47	23.82	6.74	16673.46	1
169.3288727	198.8487549	29.5198822	183.6674144	7.927893028	129118.1923	-0.341088563	0.541381359	0.882469922	-0.013556503	0.156542521	-9.530221265	-0.704345703	0.730529785	1.434875488	-0.07378534	0.264804267	-51.87109375	907.8299561	1025.315308	117.4853516	961.9750331	31.57600884	676268.4483	0.39493373	0.501006544	0.106072813	0.461029449	0.019573868	324.1037028	15.02	29.72	14.70	22.78	3.32	16013.48	1
0.107448936	359.8814392	359.7739903	34.12954595	65.16917377	24095.45944	-0.43289113	0.912342489	1.345233619	0.166358877	0.242924011	117.449367	-1.261047363	1.187988281	2.449035645	0.043124969	0.528206452	30.44622803	875.6766357	1021.340027	145.6633911	940.2300295	39.9291285	663802.4008	0.21355772	0.563184202	0.349626482	0.420666299	0.084397638	296.9904068	0.52	32.90	32.37	26.59	5.47	18769.58	1
0.186862648	359.8382568	359.6513942	140.0224856	152.1261178	98435.80738	-0.556559503	0.879069626	1.435629129	-0.045076033	0.281351527	-31.68845116	-0.975952148	0.78137207	1.757324219	-0.138582102	0.343746279	-97.42321777	1140.556396	1243.70459	103.1481934	1186.388475	24.93933471	834031.0983	0.363171011	0.562510669	0.199339658	0.455763228	0.035772584	320.4015494	8.06	30.45	22.39	19.31	5.68	13577.87	1
44.84691238	106.2014084	61.354496	77.1387452	19.16715344	54151.39913	-0.651616812	0.64434135	1.295958161	-0.061131804	0.261410396	-42.91452622	-1.013793945	0.973388672	1.987182617	-0.082150016	0.364404108	-57.66931152	1126.530518	1238.561646	112.0311279	1181.671068	27.34915623	829533.0895	0.367621809	0.635565758	0.267943949	0.505863698	0.064183511	355.116316	13.15	30.44	17.29	21.51	4.47	15097.16	1
61.88002396	100.5724792	38.69245529	78.86381325	11.15838936	55598.98834	-0.450679243	0.653259099	1.103938341	-0.049676511	0.18781991	-35.02194019	-0.832641602	0.878662109	1.711303711	-0.011731217	0.334995094	-8.270507813	1066.970215	1183.011475	116.0412598	1130.060075	32.2860732	796692.3531	0.424153596	0.61003226	0.185878664	0.535875175	0.033900956	377.7919984	17.62	31.39	13.77	22.83	4.13	16097.03	1
32.18731689	124.6147079	92.42739105	62.88860311	18.98579768	44525.131	-1.256918669	0.409252942	1.66617161	-0.15785635	0.221462039	-111.7622959	-1.619628906	0.899536133	2.519165039	-0.188996913	0.429783973	-133.8098145	1059.136841	1170.841309	111.7044678	1119.137752	28.71304775	792349.5283	0.438332766	0.583511531	0.145178765	0.522264992	0.031064836	369.7636142	10.20	30.54	20.34	21.53	3.57	15243.29	1
10.31694508	357.5847473	347.2678022	95.55162202	35.91721836	67459.44515	-1.006237507	0.421165168	1.427402675	-0.073454944	0.197963694	-51.85919066	-1.453796387	1.241699219	2.695495605	-0.18989429	0.473279374	-134.0653687	1001.016785	1124.522705	123.5059204	1055.211609	31.89273518	744979.3957	0.235056102	0.652856946	0.417800844	0.465404435	0.075165881	328.5755313	0.50	32.24	31.74	22.77	7.02	16072.60	1
134.0981445	303.2675171	169.1693726	255.1432615	34.37851463	179875.9993	-1.052994967	0.524975657	1.577970624	-0.201756778	0.272420253	-142.2385288	-1.343505859	0.964233398	2.307739258	-0.206402718	0.502385166	-145.513916	1056.304688	1151.820557	95.51586914	1105.149978	27.25762718	779130.7345	0.396241665	0.733902931	0.337661266	0.538607984	0.069945265	379.7186288	4.27	31.28	27.00	19.34	6.10	13634.24	1
103.3253555	253.9637299	150.6383743	154.657691	43.20526235	108415.0414	-1.271749139	0.394904763	1.666653901	-0.176439042	0.314454168	-123.6837686	-1.82043457	1.305297852	3.125732422	-0.197940407	0.541203457	-138.7562256	1081.705811	1190.451416	108.7456055	1137.221844	24.18023085	797192.5128	0.435131133	0.7663275	0.331196368	0.55759168	0.072742557	390.8717677	8.39	33.28	24.89	19.92	5.29	13961.63	1
186.9897766	289.9566345	102.9668579	238.6939536	22.26613388	167085.7675	-1.025452375	0.490831465	1.51628384	-0.180690336	0.22228501	-126.4832349	-1.424438477	0.903442383	2.327880859	-0.142378714	0.318750933	-99.6651001	1020.790833	1131.979126	111.1882935	1083.998	26.24848146	758798.5999	0.448097289	0.693976879	0.245879591	0.560811154	0.04519045	392.5678077	10.34	26.07	15.73	19.41	3.59	13590.32	1
0.136640057	359.7897644	359.6531243	95.1204212	104.3187326	67059.89695	-1.306080341	0.551809549	1.857889891	-0.301110422	0.317311427	-212.2828476	-1.782226563	0.756591797	2.538818359	-0.291706491	0.502479495	-205.6530762	1036.921875	1142.425903	105.5040283	1097.702208	28.45611605	773880.0566	0.463546395	0.697842002	0.234295607	0.584119464	0.049102078	411.8042224	10.52	32.06	21.54	22.13	4.09	15603.38	1
3.284829855	353.0955811	349.8107512	239.87346	54.28896531	169590.5362	-1.247397542	0.54982239	1.797219932	-0.048462615	0.252420731	-34.26306853	-1.513183594	0.891967773	2.405151367	-0.251413996	0.493476671	-177.7496948	1003.504761	1115.787476	112.2827148	1047.478955	29.40326394	740567.6214	0.362886101	0.615823627	0.252937526	0.4462579	0.059955262	315.5043351	0.51	32.81	32.30	20.98	7.97	14834.72	1
0.27232331	359.0651855	358.7928622	105.893256	92.55661502	74442.95895	-1.526652575	0.922723353	2.449375927	-0.253240388	0.420104595	-178.0279926	-1.892822266	1.289428711	3.182250977	-0.33835477	0.60463049	-237.8634033	1024.625244	1126.945801	102.3205566	1078.961223	27.28299664	758509.74	0.380475879	0.667791486	0.287315607	0.532832076	0.062008678	374.5809498	8.27	36.10	27.83	21.68	4.96	15238.70	1
3.067385197	341.6279907	338.5606055	85.09533376	59.27199485	59566.73363	-1.276270866	0.540307283	1.81657815	-0.003096159	0.156923533	-2.167311613	-1.352905273	0.362182617	1.715087891	-0.259408918	0.348438298	-181.5862427	966.5228882	1065.423096	98.90020752	1002.645608	26.93116389	701851.9255	0.284132391	0.493852496	0.209720105	0.404753052	0.060572015	283.3271363	1.12	30.79	29.67	19.83	6.24	13881.86	1
0.045895621	72.65743256	72.61153693	49.04970382	14.88674649	34678.1406	-0.913911998	0.37462759	1.288539588	-0.110029226	0.218830643	-77.79066249	-1.208129883	0.911865234	2.119995117	-0.114313754	0.416147345	-80.81982422	1213.243896	1343.271851	130.0279541	1279.976298	35.53293927	904943.2426	0.372931182	0.628113568	0.255182385	0.524817503	0.057783246	371.0459746	12.80	33.77	20.97	23.72	5.07	16769.04	1
57.0931778	172.1125488	115.019371	130.0771194	26.62469689	91184.06068	-0.953744233	0.590656638	1.544400871	-0.183610102	0.217107709	-128.7106816	-1.073120117	0.893798828	1.966918945	-0.235805016	0.299442601	-165.2993164	1168.043823	1268.728638	100.6848145	1221.758975	22.59237529	856453.0416	0.412998855	0.633296192	0.220297337	0.52085628	0.054922196	365.120252	12.72	28.27	15.55	18.09	3.33	12680.75	1
60.88250732	230.216095	169.3335876	205.0666341	21.48282056	143546.6439	-1.006309986	0.94675833	1.953068316	-0.023731024	0.318146736	-16.61171685	-1.330444336	1.271240234	2.60168457	-0.064385986	0.490787944	-45.07019043	1037.06897	1130.586426	93.51745605	1083.606109	27.82314226	758524.2764	0.305642009	0.633464992	0.327822983	0.486989879	0.092176928	340.8929156	2.47	26.96	24.50	18.92	5.43	13244.99	1
0.187339231	359.1304932	358.9431539	301.0913945	69.63949548	212570.5245	-0.57262224	0.528427541	1.101049781	-0.029041087	0.163530697	-20.50300711	-0.957702637	1.000976563	1.958679199	-0.177588185	0.354092661	-125.3772583	1021.956055	1120.569214	98.61315918	1058.619691	27.58114707	747385.5019	0.279779166	0.559946239	0.280167073	0.418836975	0.073154998	295.6989043	0.25	33.72	33.47	18.57	7.58	13111.08	1
11.25921822	168.3694153	157.1101971	33.29551457	31.03857541	23406.74675	-0.36740613	0.163488299	0.530894428	-0.071961529	0.098342511	-50.58895497	-1.061401367	0.338867188	1.400268555	-0.249820801	0.312922848	-175.6240234	1131.358765	1247.862549	116.5037842	1177.375703	34.5393027	827695.1193	0.19380717	0.536729395	0.342922226	0.39486095	0.107522046	277.5872475	0.80	31.70	30.91	22.88	9.46	16085.57	1
0.182475477	359.85849	359.6760145	159.022054	158.1398675	111792.5039	-1.229395986	0.975194514	2.204590499	-0.100755602	0.383374936	-70.83118816	-1.539428711	1.501586914	3.041015625	-0.08493628	0.527366362	-59.71020508	1088.121216	1192.753296	104.6320801	1145.943674	26.21864514	805598.4027	0.439900011	0.638139307	0.198239297	0.545929387	0.045702352	383.7883588	11.72	33.18	21.47	21.13	4.04	14853.09	1
230.0552826	275.8854675	45.83018494	246.1283115	7.520648822	173028.203	-0.22935991	0.433611631	0.662971541	0.045084937	0.147227686	31.69471069	-0.972839355	0.647399902	1.620239258	-0.028995346	0.242176304	-20.38372803	890.6066895	1017.769836	127.163147	950.0135607	31.79049178	667859.5332	0.295943618	0.517178595	0.221234977	0.43617531	0.050722556	306.6312432	14.45	29.06	14.61	23.28	2.89	16367.83	1
0.173077881	359.9571228	359.7840449	192.6981866	145.7847389	135274.127	-1.235142112	0.286160469	1.521302581	-0.266781018	0.268676934	-187.2802749	-1.587036133	1.285522461	2.872558594	-0.157906991	0.530408293	-110.850708	1087.382324	1197.805542	110.4232178	1155.033539	26.64105444	810833.5446	0.449516237	0.676357806	0.226841569	0.580865245	0.048929228	407.7674019	1.85	32.92	31.06	20.75	5.60	14568.29	1
84.3105545	309.7289734	225.4184189	270.9511893	35.75804883	191562.4908	-1.583537817	0.405926019	1.989463836	-0.055119439	0.230461922	-38.96944363	-1.88861084	0.798034668	2.686645508	-0.257809565	0.56749857	-182.2713623	936.0327148	1056.476318	120.4436035	990.5569327	33.65637827	700323.7514	0.355104327	0.554306567	0.19920224	0.453701384	0.047671342	320.7668788	0.65	31.64	30.99	23.91	6.04	16905.48	1
0.737178802	359.8512573	359.1140785	50.53196453	29.11902013	35574.50303	-0.984390497	0.704812527	1.689203024	-0.089645696	0.373184416	-63.11056974	-1.206298828	0.821960449	2.028259277	-0.175886067	0.442085759	-123.8237915	948.0947876	1079.320679	131.2258911	1009.733242	30.31841484	710852.2023	0.379307151	0.60292393	0.223616779	0.492789745	0.048511939	346.9239807	17.99	33.72	15.73	23.31	3.46	16412.87	1
0.192676574	359.9224854	359.7298088	237.731203	143.6148172	167600.4981	-1.038936138	0.880693436	1.919629574	-0.165174304	0.325448277	-116.4478842	-1.317993164	1.004394531	2.322387695	-0.135515189	0.434688523	-95.53820801	1051.378784	1191.815552	140.4367676	1127.951777	35.64772525	795206.0026	0.451980054	0.735592544	0.28361249	0.557554725	0.063073492	393.0760814	20.11	31.98	11.86	26.65	2.54	18789.69	1
126.1848679	253.6515045	127.4666367	171.8753419	25.29762072	120828.3654	-1.03621757	0.618457854	1.654675424	-0.190539237	0.348382072	-133.9490839	-1.274902344	1.172363281	2.447265625	-0.220029394	0.51011948	-154.6806641	1054.459229	1164.552856	110.0936279	1112.121539	26.13853247	781821.4418	0.435816258	0.652499557	0.216683298	0.54398321	0.042381157	382.4201964	10.77	29.45	18.68	19.91	4.21	13998.45	1
188.0948944	315.2349548	127.1400604	247.1705861	27.63483866	174008.0926	-1.06346941	0.250993103	1.314462513	-0.252906914	0.212737221	-178.0464675	-1.357543945	1.106079102	2.463623047	-0.301388307	0.370621127	-212.1773682	1048.946045	1168.2323	119.2862549	1108.889568	27.72925143	780658.256	0.460623473	0.659865141	0.199241668	0.544054951	0.037888662	383.0146857	13.73	29.89	16.17	21.25	3.54	14958.24	1
1.168364406	353.0519409	351.8835765	173.7206253	137.5339132	122646.7615	-1.585945368	0.693360567	2.279305935	-0.282730656	0.391314088	-199.6078429	-1.874206543	1.16784668	3.042053223	-0.268127355	0.57463935	-189.2979126	1018.79834	1142.07251	123.2741699	1090.11629	30.95383972	769622.1005	0.43239361	0.651402295	0.219008684	0.546068661	0.038603237	385.5244748	16.76	33.80	17.04	25.94	4.06	18313.47	1
112.7389221	187.04039	74.3014679	138.7799593	11.96077126	98117.43121	-0.92689079	0.577362597	1.504253387	-0.050941043	0.230807521	-36.01531713	-1.549926758	1.214599609	2.764526367	0.090253298	0.420250356	63.80908203	1060.531982	1182.956909	122.4249268	1136.70539	32.07869183	803650.7106	0.403431296	0.742519736	0.33908844	0.580030465	0.062262941	410.0815388	2.70	32.44	29.74	21.76	6.90	15383.06	1
31.25197792	64.0300827	32.77810478	44.45273353	6.790352286	31428.08261	-0.200999424	0.313362926	0.51436235	0.040174045	0.093698792	28.40305017	-0.679016113	0.682556152	1.361572266	0.001472009	0.231070334	1.040710449	863.6694946	1013.175415	149.5059204	934.6153755	38.72994397	660773.0705	0.303091675	0.553494871	0.250403196	0.476919192	0.045235956	337.1818686	18.68	33.17	14.49	27.16	2.82	19205.05	1
168.6574554	269.0563965	100.398941	205.8774668	28.6499973	145967.124	-0.962776601	0.79897207	1.761748672	-0.121598036	0.336930595	-86.21300721	-0.950500488	0.97668457	1.927185059	-0.200715876	0.445753358	-142.3075562	1026.327393	1144.352539	118.0251465	1082.545359	26.58115519	767524.6593	0.38099432	0.659140766	0.278146446	0.505817312	0.066694092	358.6244741	15.29	31.70	16.41	21.34	4.29	15132.56	1
266.3694153	322.3953857	56.02597046	303.0729232	12.94906596	213969.4838	-1.098367095	0.842805982	1.941173077	-0.059577943	0.290458622	-42.06202782	-1.419921875	1.238891602	2.658813477	-0.0542606	0.438805187	-38.3079834	980.5776978	1110.024902	129.4472046	1051.198623	30.88747107	742146.2275	0.428923875	0.610004902	0.181081027	0.526648553	0.040531881	371.8138787	12.72	30.57	17.86	23.24	3.38	16403.96	1
0.080979176	359.7832336	359.7022545	246.5695283	109.5615508	173584.9479	-1.161905766	0.90815264	2.070058405	-0.198875974	0.441199726	-140.0086853	-1.622619629	1.400512695	3.023132324	-0.173654816	0.61601921	-122.2529907	921.5758057	1037.03479	115.4589844	984.7852696	30.35175011	693288.8298	0.413814485	0.623081028	0.209266543	0.541452807	0.050217562	381.1827761	12.36	30.41	18.05	23.67	4.02	16661.65	1
103.2307129	168.5471191	65.31640625	124.2929022	16.20292319	87377.91027	-0.824112773	0.53559345	1.359706223	-0.113276436	0.150805692	-79.63333437	-1.011108398	0.943969727	1.955078125	-0.062067111	0.300129303	-43.63317871	1045.029663	1142.373169	97.34350586	1102.273016	23.56248406	774897.9302	0.39782843	0.643580258	0.245751828	0.544139727	0.058083492	382.5302278	10.10	25.91	15.81	17.78	3.58	12496.82	1
323.0109558	356.4908142	33.4798584	340.2274084	6.935207215	240200.5504	-0.661691964	0.545041859	1.206733823	-0.030230698	0.24728302	-21.34287246	-1.040405273	1.123779297	2.16418457	0.123342109	0.426820847	87.07952881	910.1012573	1090.637329	180.5360718	1012.77367	47.56690921	715018.2108	0.421655625	0.777631104	0.355975479	0.565135645	0.074344619	398.9857652	13.89	38.03	24.14	31.38	5.22	22155.84	1
297.2341919	353.1427612	55.90856934	327.6716514	15.42069733	229042.4843	-0.844889939	0.758315265	1.603205204	0.088842581	0.319491929	62.10096419	-1.05078125	1.407104492	2.457885742	0.192150111	0.514543268	134.3129272	903.395752	1097.318848	193.9230957	1006.696554	48.69319628	703680.8915	0.370636374	0.753216684	0.38258031	0.537963267	0.075159599	376.0363235	12.37	42.61	30.24	32.95	4.83	23030.22	1
296.8260193	328.9873352	32.16131592	310.8542996	6.10780057	218219.7183	-0.448534876	0.468073964	0.91660884	-0.077255429	0.15979769	-54.23331135	-0.754577637	0.668212891	1.422790527	-0.075034552	0.241140955	-52.67425537	926.5844116	1078.58313	151.9987183	1003.039522	38.86796838	704133.7447	0.469888359	0.58122772	0.11133936	0.516435588	0.0204155	362.5377831	23.91	31.03	7.12	27.76	1.35	19488.47	1
212.4099121	266.99646	54.58654785	244.4805909	6.469694344	171625.3748	-0.236547157	0.602178216	0.838725373	0.0670777	0.150854844	47.08854572	-0.513427734	0.719787598	1.233215332	0.125545752	0.258177878	88.13311768	971.7255859	1117.956177	146.2305908	1045.74788	35.83743631	734115.0118	0.370048553	0.572405636	0.202357084	0.497211858	0.037650789	349.0427245	19.68	33.01	13.33	25.48	2.28	17886.40	1
177.4195099	258.8466797	81.4271698	218.7484639	17.27849801	153123.9248	-1.087853074	0.283911437	1.371764511	-0.174591169	0.178079125	-122.2138184	-1.284179688	0.601074219	1.885253906	-0.142935268	0.264292446	-100.0546875	1043.106567	1161.80542	118.6988525	1110.49307	29.00760358	777345.149	0.412957639	0.625737429	0.21277979	0.544061923	0.058752644	380.8433461	17.04	28.77	11.74	21.61	2.48	15126.48	1
150.9374695	236.3405609	85.40309143	187.8121331	16.4576271	131844.1174	-0.734809279	0.183949068	0.918758348	-0.204757647	0.161749419	-143.7398682	-1.30871582	0.619384766	1.928100586	-0.224186476	0.368558854	-157.3789063	1098.068726	1242.489624	144.4208984	1169.590117	39.01862942	821052.2621	0.43956238	0.599025548	0.159463167	0.512865185	0.037186712	360.0313596	18.46	34.31	15.85	26.73	4.43	18762.59	1
242.0604401	316.7750854	74.71464539	281.7040391	22.67695172	198883.0516	-0.665725291	0.109751619	0.77547691	-0.223138485	0.134748027	-157.5357707	-1.107543945	0.584350586	1.691894531	-0.234606864	0.330204479	-165.6324463	1156.187622	1293.079834	136.8922119	1235.827091	35.08619053	872493.9263	0.461956769	0.618243992	0.156287223	0.526553734	0.033007482	371.7469363	16.21	34.92	18.71	25.66	3.48	18119.04	1
192.6206818	318.5645447	125.9438629	270.3550872	35.92927196	191141.0466	-1.36597693	0.726979136	2.092956066	-0.256731141	0.402991594	-181.5089169	-1.675048828	1.145019531	2.820068359	-0.281196476	0.50824332	-198.8059082	1007.709717	1140.968872	133.2591553	1083.251261	32.34216578	765858.6414	0.457388878	0.631420493	0.174031615	0.552292284	0.036661686	390.4706447	19.89	35.26	15.37	26.43	2.60	18684.71	1
206.338501	287.5028687	81.16436768	240.1170801	18.5150503	167841.839	-0.994751871	0.373148471	1.367900342	-0.166357114	0.161958322	-116.2836228	-1.088378906	0.775878906	1.864257813	-0.16569936	0.292295375	-115.8238525	1109.883423	1223.437256	113.553833	1168.614112	27.31159492	816861.2643	0.442398787	0.656307638	0.213908851	0.534273731	0.051345894	373.4573377	14.91	27.10	12.19	20.99	3.30	14672.80	1
156.0301514	194.0952759	38.06512451	166.6043374	4.998767573	117622.6622	-0.265077412	0.555068374	0.820145786	0.032005219	0.115629618	22.59568478	-0.791015625	0.528442383	1.319458008	0.010959528	0.267890799	7.737426758	1094.382202	1220.293335	125.9111328	1153.970729	27.78139586	814703.3347	0.342017472	0.624706805	0.282689333	0.484294164	0.071341298	341.9116801	13.29	31.63	18.35	21.38	4.98	15094.28	1
217.79422	286.4925232	68.69830322	262.2630795	14.94222825	183846.4187	-0.414462358	0.219923437	0.634385794	-0.127525099	0.099078587	-89.39509448	-0.887329102	0.500854492	1.388183594	-0.20587254	0.260618025	-144.3166504	1149.907227	1258.214478	108.307251	1199.982475	30.04803626	841187.7152	0.396394521	0.609887838	0.213493317	0.493453549	0.045435107	345.9109377	10.66	28.34	17.68	21.45	5.01	15034.78	1
97.70393372	214.4586029	116.7546692	152.7409869	25.26878423	107376.9138	-0.932378948	0.846254826	1.778633773	-0.123902102	0.322091869	-87.10317764	-1.320922852	0.907958984	2.228881836	-0.134586426	0.414146492	-94.61425781	1092.758423	1219.519653	126.7612305	1159.388442	26.82358113	815050.0745	0.327184498	0.670630932	0.343446434	0.526993624	0.086094111	370.4765177	5.46	30.13	24.66	20.73	5.69	14571.74	1
111.7608032	232.818573	121.0577698	154.7002925	34.43323657	109373.1068	-1.037895799	0.642915666	1.680811465	-0.239330085	0.273698744	-169.2063701	-1.48828125	0.973876953	2.462158203	-0.23056026	0.418901026	-163.0061035	1049.600464	1159.633545	110.0330811	1111.975387	28.0400681	786166.5989	0.447922587	0.607978702	0.160056114	0.540811895	0.030523975	382.3540094	14.36	29.49	15.13	21.68	3.64	15326.69	1
143.3275909	218.3146515	74.98706055	172.0213999	14.90332305	120414.9799	-0.91878444	0.731131554	1.649915993	-0.067304055	0.262479207	-47.11283834	-1.499023438	1.075439453	2.574462891	-0.012702462	0.417449016	-8.891723633	1109.069946	1203.004395	93.93444824	1167.044853	22.15711719	816931.397	0.392581075	0.693137884	0.300556809	0.557109376	0.071661318	389.9765631	10.19	30.27	20.08	17.04	5.05	11928.73	1
137.0896606	197.5128937	60.42323303	162.2327689	15.11386023	114698.5676	-0.428449064	0.068005249	0.496454313	-0.143674592	0.090920516	-101.5779362	-0.907592773	0.672973633	1.580566406	-0.192500394	0.308336257	-136.0977783	1167.876099	1292.560791	124.6846924	1227.63023	33.91386706	867934.5725	0.411201417	0.582521796	0.171320379	0.499798302	0.047179718	353.3573994	11.95	29.80	17.85	23.70	4.20	16759.35	1
240.9309387	329.946991	89.01605225	282.3450421	23.88503076	198770.9097	-0.990977466	0.451561779	1.442539245	-0.159026537	0.272468278	-111.9546823	-1.247314453	0.657226563	1.904541016	-0.117447766	0.409194076	-82.68322754	1061.042114	1178.599243	117.5571289	1125.820045	30.27329454	792577.312	0.46498552	0.613034904	0.148049384	0.54018045	0.032898905	380.2870371	12.24	29.72	17.48	21.95	3.48	15454.39	1
73.73966217	182.886322	109.1466599	116.6615535	28.08200825	81429.76436	-1.046664	0.283241093	1.329905093	-0.266937259	0.243843305	-186.3222069	-1.432617188	0.770996094	2.203613281	-0.290173025	0.42707021	-202.5407715	1071.265259	1186.162964	114.8977051	1138.428858	30.26915164	794623.3429	0.427949727	0.643430352	0.215480626	0.539035625	0.045001239	376.2468663	12.21	35.64	23.43	22.57	5.22	15756.22	1
252.3682404	322.1183777	69.75013733	297.5976719	13.58848589	209211.1634	-0.804816902	0.723433912	1.528250813	-0.057417767	0.293378044	-40.36469008	-0.917724609	1.203979492	2.121704102	-0.031531474	0.43829182	-22.16662598	1043.915527	1167.925537	124.0100098	1106.306636	31.82126931	777733.5654	0.424270481	0.588919818	0.164649338	0.515839236	0.041755185	362.6349832	15.47	32.12	16.65	23.49	3.69	16516.98	1
14.19129467	134.8636017	120.672307	63.29085048	26.09023859	44809.92214	-1.008512497	0.302799612	1.311312109	-0.243007402	0.238551405	-172.0492404	-1.274536133	1.813354492	3.087890625	-0.233126538	0.534500388	-165.0535889	1097.15564	1236.304443	139.1488037	1168.090478	33.16345743	827008.0583	0.467337519	0.637401164	0.170063645	0.536727574	0.037448405	380.0031226	10.44	33.21	22.77	24.25	4.46	17166.02	1
161.5772247	255.7644806	94.18725586	198.2719748	17.0339092	140178.2862	-1.211650968	0.711639047	1.923290014	-0.188160598	0.300235414	-133.0295425	-1.715576172	1.107421875	2.822998047	-0.154784811	0.478776288	-109.4328613	1095.147949	1202.604858	107.4569092	1160.386207	27.39514761	820393.0486	0.410545528	0.681427598	0.27088207	0.559535638	0.072622471	395.5916963	11.19	32.07	20.89	19.96	6.09	14113.80	1
46.50874329	91.56568909	45.0569458	67.31937426	11.73944854	47662.11697	-0.325698882	0.302883238	0.62858212	-0.068826538	0.09315355	-48.72918913	-0.733276367	0.661865234	1.395141602	-0.080600027	0.253325632	-57.06481934	1214.540649	1323.487427	108.9467773	1270.210149	24.70601257	899308.7854	0.414280951	0.629696965	0.215416014	0.505966569	0.060952461	358.2243309	13.12	29.52	16.39	19.66	4.12	13922.36	1
0.603500843	359.9804688	359.3769679	60.87343829	51.20640678	42794.02712	-0.89364475	0.103031926	0.996676676	-0.231783226	0.163081648	-162.9436079	-1.21105957	0.310302734	1.521362305	-0.261809738	0.226929279	-184.0522461	1072.258179	1169.107666	96.8494873	1124.926522	23.09470908	790823.3452	0.406254798	0.642305076	0.236050278	0.517961913	0.047689594	364.1272247	12.48	22.71	10.23	18.91	2.02	13294.13	1
0.106025964	359.8743591	359.7683332	223.8200141	139.7649929	158016.9299	-1.166299939	0.130355164	1.296655104	-0.238011833	0.193253422	-168.0363539	-1.517333984	0.517333984	2.034667969	-0.236386567	0.28607677	-166.888916	1076.817261	1173.840454	97.02319336	1136.118327	23.1062631	802099.5389	0.425248355	0.672734559	0.247486204	0.543693461	0.055409759	383.8475831	12.53	27.41	14.88	19.61	3.05	13845.02	1
223.9631348	310.3365479	86.37341309	280.9749369	14.59459782	196120.506	-0.884501457	0.387901008	1.272402465	-0.078879526	0.210232876	-55.0579093	-1.399291992	0.680908203	2.080200195	-0.178157599	0.373944608	-124.3540039	1078.632324	1185.995972	107.3636475	1132.00671	27.21457939	790140.6837	0.401539475	0.56950134	0.167961866	0.479975819	0.038167685	335.0231217	10.54	29.04	18.50	20.83	3.38	14540.46	1
105.6110001	166.6398621	61.028862	135.2863875	16.79640566	95512.18955	-0.610596657	0.521549284	1.132145941	-0.081461439	0.187192869	-57.51177579	-0.931762695	0.848388672	1.780151367	-0.169286971	0.358100896	-119.5166016	1084.859497	1193.081421	108.2219238	1141.095159	26.38850638	805613.1821	0.414757609	0.611100137	0.196342528	0.489550598	0.042402255	345.622722	13.87	30.99	17.12	20.54	3.95	14504.66	1
254.9931641	309.3167419	54.32357788	286.3765256	14.1826462	202181.8271	-0.729909897	1.035617232	1.765527129	-0.03235567	0.283238249	-22.84310336	-1.008789063	1.583007813	2.591796875	0.015036434	0.410619933	10.61572266	1064.692139	1164.224609	99.5324707	1120.263987	25.66006232	790906.375	0.397457272	0.607551038	0.210093766	0.513518734	0.049967054	362.5442265	12.20	31.70	19.50	20.36	3.92	14373.49	1
0.470361769	359.8778076	359.4074458	312.1055246	40.1504295	220346.5004	-0.982819796	0.528673053	1.511492848	-0.146422446	0.275677986	-103.3742467	-1.330688477	0.935424805	2.266113281	-0.178891449	0.407214949	-126.2973633	1043.546997	1147.929932	104.3829346	1101.307279	23.84458898	777522.9391	0.430395186	0.59145689	0.161061704	0.516097076	0.036021135	364.3645357	12.09	27.77	15.69	19.52	3.67	13778.96	1
106.7900009	223.1282349	116.3382339	138.4063616	29.52678509	97576.48495	-1.079435706	0.485046327	1.564482033	-0.149566997	0.267472469	-105.444733	-1.471557617	0.710693359	2.182250977	-0.197517904	0.362095338	-139.2501221	1073.781616	1166.593384	92.81176758	1118.572183	23.95502659	788593.3889	0.452211171	0.597053766	0.144842595	0.522806141	0.03304474	368.5783295	8.12	23.51	15.38	18.76	2.75	13227.78	1
102.1504364	204.0004883	101.8500519	148.804931	20.12321658	105056.2813	-0.937638938	0.321832478	1.259471416	-0.188453296	0.238418005	-133.0480269	-1.258422852	0.838989258	2.097412109	-0.165926925	0.374501139	-117.1444092	1042.377197	1163.367065	120.9898682	1112.161804	27.12366577	785186.2334	0.364089966	0.669599652	0.305509686	0.547567724	0.076460441	386.5828135	9.95	28.65	18.71	20.79	5.31	14676.19	1
0.050175302	359.9291077	359.8789324	308.583623	108.6075046	218168.6215	-0.436996192	0.601875424	1.038871616	0.07234129	0.17102892	51.14529208	-0.811767578	0.845458984	1.657226563	0.010675368	0.32557567	7.547485352	1004.952881	1116.696167	111.7432861	1053.462658	28.35840704	744798.0995	0.349553168	0.540316999	0.190763831	0.453936329	0.043726346	320.9329846	10.46	27.82	17.37	20.57	3.53	14545.96	1
209.8440704	314.3623352	104.5182648	256.733343	30.18987608	182794.1402	-0.665028214	0.412096858	1.077125072	-0.135056901	0.219391457	-96.1605136	-1.093017578	1.222045898	2.315063477	-0.186523095	0.416368372	-132.8044434	1075.710327	1183.587402	107.8770752	1133.292839	23.02178478	806904.5011	0.377817959	0.682961583	0.305143625	0.504189645	0.070904943	358.983027	13.02	33.62	20.60	20.20	4.99	14384.33	1
1.47566843	359.0417786	357.5661101	262.3488904	65.81018569	185480.6655	-1.315109968	0.464686066	1.779796034	-0.182962128	0.37344687	-129.3542243	-1.727539063	0.629394531	2.356933594	-0.242595926	0.587886834	-171.5153198	1015.452087	1130.94751	115.4954224	1073.881532	31.12123177	759234.2433	0.419309169	0.623308003	0.203998834	0.521901527	0.044269323	368.9843794	6.64	30.10	23.46	22.75	4.40	16087.58	1
130.9816437	182.9027252	51.92108154	147.2671315	7.894901232	103381.5263	-0.556717038	0.419430196	0.976147234	-0.073051642	0.143685314	-51.28225291	-1.105834961	0.818481445	1.924316406	-0.126448846	0.375892633	-88.76708984	1073.272705	1197.272827	124.0001221	1129.589189	27.51668477	792971.6104	0.384979904	0.673241317	0.288261414	0.505278153	0.073668315	354.7052632	10.97	33.52	22.56	21.54	6.04	15117.93	1
97.95446777	195.818573	97.86410522	128.7960166	20.26921082	90157.21165	-1.404223204	0.260752797	1.664976001	-0.220087668	0.261017096	-154.0613675	-1.848999023	0.572631836	2.421630859	-0.228748256	0.413205464	-160.1237793	1030.618286	1158.56543	127.9471436	1099.530978	33.13138035	769671.6846	0.454427689	0.610026062	0.155598372	0.532628658	0.035080731	372.8400608	15.20	30.44	15.24	23.53	3.23	16469.00	1
7.905668259	104.216629	96.31096077	78.10662206	24.52705231	54908.95531	-0.9374336	0.150181547	1.087615147	-0.239466106	0.23415985	-168.3446725	-1.317321777	0.671630859	1.988952637	-0.225681788	0.404709654	-158.6542969	1011.432007	1150.726807	139.2947998	1088.524162	35.64278888	765232.4861	0.46693638	0.654527009	0.187590629	0.53747319	0.036549217	377.8436522	16.05	32.38	16.32	25.46	3.29	17897.35	1
84.32617188	153.3498077	69.02363586	120.9883974	22.21791319	85659.78539	-0.712719381	0.495094657	1.207814038	-0.116894147	0.215680669	-82.76105593	-1.079101563	0.870605469	1.949707031	-0.228550453	0.401311423	-161.8137207	1086.149658	1191.095093	104.9454346	1141.233057	23.18314603	807993.0045	0.329589844	0.638027012	0.308437169	0.492452777	0.082088632	348.6565659	10.40	33.06	22.66	19.58	5.54	13862.00	1
96.33337402	219.4606628	123.1272888	152.5270553	20.42790908	107836.6281	-1.021280289	0.370613992	1.391894281	-0.202180185	0.25739713	-142.941391	-1.278564453	1.084716797	2.36328125	-0.232917581	0.476762959	-164.6727295	1053.79126	1177.526489	123.7352295	1120.141704	30.92775253	791940.1847	0.404618263	0.638470769	0.233852506	0.527842387	0.055661593	373.1845674	11.96	32.33	20.37	22.05	4.84	15591.58	1
6.175337315	49.23952484	43.06418753	31.05614075	9.872298946	21863.52309	-0.571994722	0.794932961	1.366927683	0.01927084	0.228126926	13.56667159	-1.300170898	1.175292969	2.475463867	0.019116662	0.457857654	13.45812988	1074.777954	1228.233887	153.4559326	1149.408539	32.44028061	809183.6116	0.365152508	0.668550611	0.303398103	0.501421352	0.074953363	353.000632	10.82	36.57	25.74	24.62	6.82	17332.77	1
212.7095032	328.6076355	115.8981323	287.0422583	24.6487113	202364.7921	-1.756761074	0.449491084	2.206252158	-0.2551483	0.339377141	-179.8795512	-3.098876953	0.959228516	4.058105469	-0.323672637	0.595122701	-228.189209	1051.223267	1168.005859	116.7825928	1113.771232	33.40438781	785208.7186	0.253848374	0.646777689	0.392929316	0.488975521	0.101020758	344.7277424	6.80	36.57	29.77	23.53	6.64	16585.31	1
0.036899753	359.9617615	359.9248617	64.92356261	95.02221685	45641.26452	-0.900165558	0.840812504	1.740978062	-0.135190295	0.259188791	-95.03877717	-1.77331543	2.479736328	4.253051758	-0.220765983	0.625653405	-155.1984863	1044.068115	1166.234863	122.166748	1111.105207	35.84684169	781106.9607	0.192388862	0.624807656	0.432418793	0.487008702	0.105879845	342.3671175	2.06	42.56	40.51	25.11	7.51	17654.09	1
1.780233622	359.2902527	357.5100191	299.9849438	27.41448003	211189.4004	-0.92265898	0.82734412	1.750003099	0.07524468	0.412459586	52.97225475	-1.466064453	2.622680664	4.088745117	0.100056388	0.546736938	70.43969727	1108.615234	1242.611938	133.9967041	1174.554265	34.17560926	826886.2023	0.354976207	0.682759702	0.327783495	0.510860042	0.075705937	359.6454694	9.16	33.19	24.02	24.05	5.18	16933.51	1
230.5215607	306.6677856	76.14622498	274.0461161	16.22607112	192106.3274	-0.512611628	0.51958245	1.032194078	-0.078985627	0.169767544	-55.36892458	-0.831420898	0.967285156	1.798706055	-0.021743143	0.377672365	-15.24194336	1138.861572	1259.350464	120.4888916	1203.545434	33.17997151	843685.3494	0.403358549	0.73670572	0.333347172	0.543691073	0.070389017	381.1274424	5.69	31.20	25.51	22.14	6.08	15517.00	1
232.4220428	320.849884	88.42784119	306.91896	8.301329888	216684.7858	-1.140545607	0.306334883	1.44688049	-0.034229064	0.142744967	-24.1657191	-1.336730957	0.754333496	2.091064453	-0.077444882	0.340278206	-54.67608643	981.4041138	1096.822388	115.4182739	1036.706828	31.84185583	731915.0208	0.376470298	0.588125467	0.21165517	0.488268386	0.056773815	344.7174804	3.99	28.39	24.40	22.09	4.23	15597.55	1
125.9119186	198.3305664	72.41864777	165.8202751	11.67346589	116405.8331	-0.514876723	0.676563442	1.191440165	0.043944231	0.225865869	30.84885013	-0.726074219	0.802001953	1.528076172	0.05415053	0.333314942	38.01367188	1046.63916	1171.954468	125.3153076	1109.967297	28.54252281	779197.0427	0.346725464	0.602573574	0.25584811	0.509967545	0.052186269	357.9972166	11.62	28.87	17.25	20.93	4.27	14691.18	1
4.563846588	107.1916656	102.6278191	66.96606173	25.88012469	47345.00564	-0.88145709	0.735243499	1.61670059	-0.183954232	0.25312977	-130.0556423	-1.064819336	0.647338867	1.712158203	-0.24894505	0.341904008	-176.0041504	960.8713379	1071.894531	111.0231934	1021.798735	26.6383704	722411.7056	0.376364291	0.605768681	0.22940439	0.521870589	0.041600402	368.9625068	14.73	27.86	13.13	20.99	2.89	14836.56	1
0.017333724	359.951416	359.9340823	164.5689238	142.8617468	116679.367	-1.416272521	0.300887734	1.717160255	-0.337630269	0.316896747	-239.3798606	-1.731933594	0.515258789	2.247192383	-0.340360784	0.452033123	-241.3157959	1121.562012	1244.586426	123.0244141	1194.150877	30.94008596	846652.9717	0.472246319	0.635824144	0.163577825	0.557734295	0.03417843	395.4336155	16.02	32.03	16.01	25.06	3.23	17769.80	1
0.005392585	359.8947754	359.8893828	125.0119634	149.9887286	88383.4581	-1.072527885	1.075430751	2.147958636	-0.078701997	0.459840541	-55.64231157	-1.489746094	1.466674805	2.956420898	0.030055886	0.585881509	21.24951172	1053.752197	1205.022949	151.270752	1140.312085	36.69329779	806200.6439	0.437130034	0.72106868	0.283938646	0.573253332	0.046284016	405.290106	13.83	35.58	21.75	26.28	3.85	18580.63	1
278.7015381	339.6737976	60.97225952	296.7535756	12.6034631	208914.5172	-0.772648573	0.574163616	1.346812189	-0.094174217	0.241249196	-66.29864849	-0.897583008	0.799804688	1.697387695	-0.069404949	0.332050432	-48.86108398	1038.399902	1187.331299	148.9313965	1117.044396	36.2186835	786399.2545	0.443315417	0.652705073	0.209389657	0.535143974	0.04148004	376.7413578	16.14	32.38	16.24	26.23	3.85	18463.84	1
254.3707428	350.2670593	95.89631653	289.933792	22.36528123	204113.3896	-0.702176332	0.210879996	0.913056329	-0.160041843	0.143491117	-112.6694576	-1.087890625	0.641723633	1.729614258	-0.170835148	0.2659722	-120.2679443	1029.774902	1132.323608	102.5487061	1082.726845	27.9451974	762239.699	0.441773176	0.610674679	0.168901503	0.514671656	0.040048043	362.3288458	10.91	28.50	17.59	20.57	3.80	14482.63	1
0.07221134	359.9549866	359.8827752	76.33424648	116.9375942	53815.64377	-1.236147165	0.621981978	1.858129144	-0.215871812	0.274738865	-152.1896275	-1.632446289	1.321777344	2.954223633	-0.069646741	0.489012778	-49.10095215	1068.255127	1188.963135	120.7080078	1143.360504	29.58351692	806069.1554	0.47245118	0.812768698	0.340317518	0.623144307	0.061820917	439.3167367	5.31	31.58	26.27	21.64	5.25	15259.32	1
90.42111206	130.085556	39.66444397	106.9870332	5.868630215	75532.84547	-0.539186537	0.342383772	0.881570309	-0.013923122	0.121422931	-9.829724214	-1.514282227	0.861450195	2.375732422	-0.003570989	0.339081048	-2.521118164	1045.692505	1185.064575	139.3720703	1119.354646	34.60188214	790264.3801	0.43273446	0.598989725	0.166255265	0.524265713	0.038094958	370.1315932	16.60	31.20	14.60	24.49	3.88	17293.30	1
1.965954065	347.6311035	345.6651495	128.7044166	36.6137826	90479.20484	-0.985913157	1.041291595	2.027204752	-0.214949907	0.252944663	-151.1097848	-1.328491211	1.190551758	2.519042969	-0.108960169	0.457096348	-76.59899902	1079.602661	1186.339355	106.7366943	1144.775995	26.89698396	804777.5243	0.506021261	0.638014019	0.131992757	0.5753495	0.024674539	404.4706985	1.41	28.83	27.43	19.92	4.70	14004.95	1
88.28455353	185.3621063	97.0775528	137.4735045	26.44749461	96643.87365	-0.786208272	0.350308418	1.13651669	-0.138004242	0.19253075	-97.0169824	-0.864624023	0.906494141	1.771118164	-0.146195782	0.275327182	-102.7756348	1116.937012	1201.92395	84.98693848	1163.909983	19.56565743	818228.7179	0.429194182	0.648144782	0.218950599	0.539730134	0.061793849	379.4302844	10.86	24.93	14.06	16.10	2.50	11317.91	1
278.2305298	342.6502991	64.41976929	302.1794814	13.77459708	212129.996	-0.647090971	0.468921602	1.116012573	-0.099792095	0.230917946	-70.05405054	-1.140625	0.799804688	1.940429688	-0.189260977	0.35343915	-132.8612061	1130.428101	1267.512329	137.0842285	1194.382037	35.6196048	838456.1897	0.341071367	0.695147812	0.354076445	0.490650244	0.064217621	344.436471	16.99	34.61	17.63	26.24	4.12	18417.16	1
0.074618235	359.8645325	359.7899142	75.43135291	91.10335694	52952.80974	-0.916875899	0.614398837	1.531274736	-0.187410813	0.310255812	-131.5623905	-1.262573242	0.874267578	2.13684082	-0.167004534	0.385449723	-117.2371826	1066.485962	1171.129272	104.6433105	1131.164302	25.18865117	794077.3401	0.440519065	0.620048165	0.179529101	0.539371072	0.042511069	378.6384926	12.50	31.88	19.39	20.25	4.66	14215.79	1
62.62020111	153.8496857	91.22948456	107.7652314	23.40759152	76190.01863	-0.690747678	0.423882514	1.114630193	-0.13721223	0.21595153	-97.00904635	-1.297729492	0.598144531	1.895874023	-0.229415095	0.33866728	-162.1964722	992.3691406	1113.484253	121.1151123	1057.354081	32.00661408	747549.3354	0.39767167	0.659923613	0.262251943	0.500688332	0.056677669	353.986651	15.57	34.06	18.48	25.20	3.83	17819.47	1
113.0015793	208.5422058	95.54062653	139.7291353	19.71085298	98229.58215	-1.045413613	0.581697047	1.62711066	-0.148296856	0.317995912	-104.2526895	-1.430541992	1.326660156	2.757202148	-0.047060363	0.555903752	-33.08343506	1000.790283	1144.780029	143.9897461	1082.093289	38.93489504	760711.5819	0.400961995	0.790337741	0.389375746	0.571999226	0.090029328	402.1154561	4.13	35.27	31.14	25.97	5.78	18258.69	1
274.9841614	349.5152893	74.53112793	318.4355807	18.63826948	224815.52	-0.884983838	0.530905664	1.415889502	-0.137209986	0.25961143	-96.87025013	-1.045654297	0.901733398	1.947387695	-0.130498351	0.349700438	-92.13183594	1078.770142	1209.918335	131.1481934	1151.781296	31.28246124	813157.5951	0.456034869	0.617588818	0.161553949	0.525530687	0.036033086	371.0246651	16.70	31.34	14.64	23.82	3.36	16813.90	1
109.546196	183.2061005	73.65990448	144.8961949	14.37324751	101427.3364	-0.222889394	0.615043044	0.837932438	0.066820097	0.146968701	46.77406766	-0.960327148	0.851928711	1.812255859	-0.083173043	0.319699318	-58.22113037	907.0187988	1010.13562	103.1168213	944.0530285	28.67923571	660837.1199	0.223948926	0.548737168	0.324788243	0.372884059	0.090925763	261.0188416	3.59	30.35	26.76	19.36	8.33	13553.63	1
0.04069728	359.996521	359.9558237	82.89696938	112.6252588	58359.46645	-1.120285034	0.536550939	1.656835973	-0.18223947	0.302783272	-128.2965868	-1.463378906	0.880859375	2.344238281	-0.074119568	0.445178329	-52.18017578	1048.678589	1161.427124	112.7485352	1117.867989	28.56940879	786979.0643	0.46507448	0.747972906	0.282898426	0.606773298	0.064053	427.168402	9.56	28.75	19.19	21.58	4.09	15192.40	1
3.336163998	58.66333771	55.32717371	39.14434758	9.168153027	27518.47635	-0.589095354	0.575079083	1.164174438	0.045123941	0.154591146	31.7221307	-0.892578125	0.874267578	1.766845703	0.062584216	0.373740259	43.9967041	1051.419189	1162.200684	110.7814941	1107.018845	27.87690862	778234.2483	0.395303756	0.671284199	0.275980443	0.530901911	0.046537701	373.2240436	6.98	30.89	23.91	20.55	3.75	14450.01	1
20.82855606	358.5372925	337.7087364	245.0810243	24.0017168	171556.717	-0.967828512	0.403958797	1.37178731	-0.095470332	0.264949425	-66.82923241	-1.678955078	0.910888672	2.58984375	-0.186181641	0.491306638	-130.3271484	1056.983032	1158.348877	101.3658447	1101.341165	27.94034951	770938.8154	0.356845558	0.710082173	0.353236616	0.508677733	0.08450933	356.0744134	1.73	31.51	29.77	20.15	6.11	14107.01	1
181.5029144	317.8492432	136.3463287	283.6641012	32.78164874	199415.8631	-1.474806309	0.577054024	2.051860332	-0.215233964	0.381879164	-151.3094765	-1.741943359	1.282226563	3.024169922	-0.227267486	0.612731338	-159.769043	1052.226929	1172.438232	120.2113037	1114.407944	30.05399193	783428.7847	0.398914307	0.633687556	0.234773248	0.553890792	0.042986458	389.3852268	12.21	32.71	20.50	22.45	4.05	15780.15	1
297.2616272	358.1425781	60.88095093	331.7879246	19.60043173	232915.123	-1.061043978	0.679749787	1.740793765	-0.146562191	0.265496113	-102.886658	-1.217407227	0.829223633	2.046630859	-0.091584556	0.388693219	-64.2923584	1066.60498	1204.174316	137.5693359	1143.619929	34.29837724	802821.1904	0.479225367	0.699733138	0.220507771	0.56683	0.045426811	397.9146603	17.64	30.74	13.10	25.01	2.90	17559.26	1
28.19701004	181.9128876	153.7158775	102.3048744	34.36603206	72227.24135	-1.411038399	0.461708546	1.872746944	-0.340240902	0.292623629	-240.2100766	-1.940917969	0.770019531	2.7109375	-0.326867641	0.43984221	-230.7685547	1068.245483	1190.111206	121.8657227	1137.146323	30.22679818	802825.304	0.506242812	0.631178737	0.124935925	0.563397311	0.025165903	397.7585013	17.72	30.60	12.88	23.35	3.12	16483.36	1
201.7204742	319.7109375	117.9904633	269.3178475	21.73949168	189330.4468	-0.888502836	0.577355027	1.465857863	-0.155414091	0.241793662	-109.2561062	-1.192382813	0.88659668	2.078979492	-0.202755924	0.345337026	-142.5374146	1018.130859	1113.914429	95.78356934	1070.646956	22.5653187	752664.8101	0.38499859	0.633215845	0.248217255	0.510393656	0.066400511	358.8067401	12.32	26.54	14.23	17.97	3.00	12629.53	1
0.027283419	359.5671997	359.5399163	71.93258801	102.2854242	50568.60937	-1.059672236	0.126098901	1.185771137	-0.296710863	0.228520309	-208.5877368	-1.470092773	0.419311523	1.889404297	-0.32255526	0.327012747	-226.7563477	1045.848633	1166.255981	120.4073486	1112.948023	28.26682785	782402.4601	0.479313761	0.618710935	0.139397174	0.545112301	0.028251133	383.2139478	15.95	29.34	13.39	22.20	2.40	15608.44	1
69.93814087	170.0942993	100.1561584	109.1667588	18.99301153	76962.56497	-0.847995937	0.62822026	1.476216197	-0.145217304	0.265004429	-102.3781992	-1.242553711	1.010498047	2.253051758	-0.202872202	0.435021414	-143.0249023	1063.09668	1184.186157	121.0894775	1120.524168	31.54578906	789969.5386	0.384353399	0.667627513	0.283274114	0.51254397	0.068581472	361.3434988	10.45	33.33	22.88	23.10	5.57	16282.56	1
53.33809662	111.3740921	58.03599548	90.89049184	12.80620071	64259.57773	-0.50881207	0.194217041	0.703029111	-0.117161525	0.113127845	-82.83319789	-0.583618164	0.892700195	1.476318359	-0.024458609	0.258217457	-17.29223633	1103.492798	1216.520874	113.0280762	1168.391448	28.39460627	826052.7534	0.489799023	0.687045217	0.197246194	0.57424943	0.033530131	405.994347	11.61	29.27	17.67	20.82	3.76	14721.63	1
194.1560669	267.9680481	73.8119812	227.9098234	16.71655745	160904.3353	-1.116356015	0.980253816	2.096609831	0.077939383	0.526331273	55.0252045	-1.514282227	1.122436523	2.63671875	0.139271679	0.640596323	98.32580566	955.3648071	1110.470581	155.1057739	1036.571716	38.81322262	731819.6314	0.417381316	0.593215048	0.175833732	0.50651961	0.035531404	357.602845	21.28	35.21	13.93	28.26	3.05	19948.40	1
0.091456756	359.7960205	359.7045638	133.7217179	156.0394612	93872.64599	-0.749705732	0.422818929	1.172524661	-0.109088719	0.208526415	-76.58028058	-1.221923828	0.862792969	2.084716797	-0.098459793	0.410171722	-69.11877441	1043.720581	1154.001587	110.2810059	1101.856945	29.99040717	773503.5754	0.452193528	0.597917557	0.145724028	0.522914756	0.024219226	367.0861589	10.15	31.81	21.65	22.39	3.96	15717.17	1
217.8624115	307.8141785	89.95176697	266.7473416	15.92670031	188323.6232	-1.440143585	1.363589883	2.803733468	-0.144294172	0.375377067	-101.8716857	-1.693786621	1.65020752	3.343994141	-0.114315562	0.515357098	-80.70678711	1003.638855	1137.436035	133.7971802	1072.5948	32.94211631	757251.9289	0.468304515	0.598705828	0.130401313	0.538705799	0.024736568	380.3262943	17.14	29.26	12.12	23.95	2.92	16909.84	1
111.1583557	160.388855	49.23049927	141.9824302	10.39779626	100381.5782	-0.544764519	0.567369282	1.112133801	-0.023056808	0.209818097	-16.30116299	-1.000854492	0.713500977	1.714355469	-0.027138803	0.365004546	-19.18713379	1087.903442	1221.428955	133.5255127	1158.419827	31.63845901	819002.8177	0.38737002	0.584066153	0.196696132	0.507949591	0.041413801	359.1203609	14.11	30.03	15.91	23.47	4.20	16594.60	1
164.0982361	268.1552124	104.0569763	231.0164429	25.75816066	162404.5593	-0.953163624	0.31713146	1.270295084	-0.198254273	0.210408867	-139.3727541	-1.220092773	0.571533203	1.791625977	-0.231758215	0.357189727	-162.9260254	1064.641113	1167.690918	103.0498047	1122.64548	24.88684375	789219.7726	0.386073798	0.673561394	0.287487596	0.540761998	0.069991618	380.1556849	13.04	29.10	16.06	19.43	3.53	13658.63	1
271.9424744	312.9207458	40.97827148	291.794283	11.83630672	205131.3809	-0.389065444	0.141785398	0.530850843	-0.094676858	0.090589002	-66.55783101	-0.707519531	0.504516602	1.212036133	-0.137520802	0.218408176	-96.67712402	1174.72229	1302.567993	127.8457031	1238.364518	31.38950497	870570.2559	0.426569551	0.580786526	0.154216975	0.492567542	0.037012102	346.2749818	18.31	31.31	13.00	23.92	3.22	16817.94	1
232.1871338	323.4942932	91.30715942	274.1668207	24.26206899	193287.6086	-0.707263887	0.256876409	0.964140296	-0.186428381	0.149602426	-131.4320085	-1.032348633	0.608520508	1.640869141	-0.211545427	0.277464221	-149.1395264	1179.962891	1289.122803	109.1599121	1243.88126	26.53254335	876936.2883	0.406356186	0.634358108	0.228001922	0.52844458	0.052726998	372.5534287	14.22	28.13	13.90	21.04	3.31	14835.06	1
155.1371155	203.282135	48.14501953	179.3151534	10.25978187	125520.6074	-0.50072521	0.560534537	1.061259747	-0.050972059	0.127494035	-35.68044122	-0.965698242	0.942749023	1.908447266	-0.097274867	0.396037289	-68.09240723	1085.392944	1200.479858	115.0869141	1141.72843	25.1007272	799209.901	0.346954435	0.642050803	0.295096368	0.505685345	0.088822423	353.9797417	10.83	33.79	22.96	20.33	6.24	14231.40	1
206.6214752	292.0538025	85.43232727	237.3086072	19.53932167	168014.4939	-0.68657124	0.343502104	1.030073345	-0.175426544	0.192322333	-124.2019935	-1.124267578	0.495849609	1.620117188	-0.190431239	0.307922221	-134.8253174	1152.692627	1265.429199	112.7365723	1212.686742	28.0283582	858582.2131	0.394196898	0.587367892	0.193170995	0.51523498	0.036964597	364.7863659	14.54	29.95	15.41	21.33	2.57	15102.27	1
127.3584824	205.4286957	78.07021332	170.2073998	15.12854275	120166.4243	-0.850342393	0.396732152	1.247074544	-0.142075028	0.186926016	-100.3049694	-1.127197266	0.718139648	1.845336914	-0.140470424	0.296582339	-99.17211914	1189.194824	1309.532837	120.3380127	1254.923709	26.80211202	885976.1385	0.392353743	0.639575779	0.247222036	0.532005579	0.069514292	375.5959389	15.01	29.81	14.80	20.62	3.84	14555.17	1
0.794003844	359.198761	358.4047571	55.44252041	34.09676943	39197.86193	-0.930584073	0.778329194	1.708913267	-0.184710218	0.238055826	-130.5901238	-1.233886719	1.228027344	2.461914063	-0.208772004	0.33281756	-147.6018066	1181.522827	1305.000122	123.4772949	1245.401427	30.19657796	880498.8088	0.426032454	0.596401334	0.17036888	0.517429456	0.038166745	365.822625	16.24	29.89	13.65	23.07	2.87	16312.03	1
107.2194824	179.5301208	72.31063843	147.6145984	18.64742282	104363.5211	-0.565840662	0.255705714	0.821546376	-0.153816329	0.126880286	-108.7481447	-0.764282227	0.786499023	1.55078125	-0.126104503	0.270512111	-89.15588379	1149.203247	1263.508545	114.3052979	1212.484665	27.10670614	857226.6583	0.389560282	0.608605742	0.21904546	0.537105253	0.042448381	379.7334138	15.43	29.14	13.72	20.76	2.79	14678.35	1
0.557966769	359.9804688	359.422502	65.91371256	100.125695	46007.77137	-0.612663627	0.193800285	0.806463912	-0.201804633	0.17172607	-140.8596337	-1.025390625	0.711914063	1.737304688	-0.286364886	0.355962701	-199.8826904	1179.522461	1309.412231	129.8897705	1249.219089	31.95284687	871954.9238	0.43289423	0.594196916	0.161302686	0.519331369	0.040046491	362.4932958	16.68	34.83	18.15	24.13	3.89	16841.71	1
323.4545288	357.8748779	34.42034912	340.2623086	7.624047245	240565.4522	-0.541646779	0.407794505	0.949441284	-0.016453886	0.179460872	-11.63289744	-1.20690918	0.76965332	1.9765625	-0.032104492	0.360648441	-22.69787598	1163.862549	1316.388306	152.5257568	1237.977787	38.64675098	875250.2957	0.420330018	0.608809769	0.188479751	0.491059767	0.026642575	347.1792555	18.32	33.53	15.21	27.38	3.16	19361.07	1
145.7292786	229.67836	83.94908142	176.001274	20.59355846	124256.8994	-0.781151533	0.636127055	1.417278588	-0.096531474	0.25041151	-68.15122055	-1.020019531	0.858276367	1.878295898	-0.110654145	0.330354082	-78.12182617	1188.91333	1308.520752	119.6074219	1253.374008	25.9908452	884882.0497	0.309676439	0.673600793	0.363924354	0.52431484	0.086871737	370.166277	8.75	31.46	22.72	20.63	5.68	14562.42	1
103.075386	147.9629669	44.88758087	120.6474767	8.047752112	84573.88114	-0.549097776	0.291667581	0.840765357	-0.034941884	0.137156258	-24.49426041	-0.88671875	1.073974609	1.960693359	-0.098379965	0.35010703	-68.96435547	1201.661255	1324.976685	123.3154297	1256.625607	30.58727661	880894.5508	0.413841069	0.595248759	0.18140769	0.492483848	0.036355085	345.2311772	11.50	32.34	20.84	22.44	4.62	15729.33	1
147.8677368	217.9191742	70.05143738	188.4440787	16.51886734	132664.6314	-0.944372773	0.484284461	1.428657234	-0.153526556	0.182690919	-108.0826957	-1.131225586	1.024414063	2.155639648	-0.082760031	0.331966367	-58.26306152	1142.414307	1249.769775	107.3554688	1207.026041	27.91968042	849746.3329	0.43351379	0.63780725	0.20429346	0.550272135	0.045777644	387.3915832	10.95	28.07	17.13	20.16	4.38	14192.10	1
121.8341827	197.8007355	75.96655273	153.8131901	11.92419287	107976.8595	-0.934437096	0.511266589	1.445703685	-0.101897357	0.321632196	-71.53194427	-1.222900391	0.900512695	2.123413086	-0.12667438	0.446717908	-88.92541504	1147.493286	1269.207642	121.7143555	1203.6954	33.07517152	844994.1705	0.396155477	0.628061414	0.231905937	0.513320752	0.057661456	360.3511677	14.43	29.22	14.79	23.10	3.48	16217.45	1
155.4507904	282.2297974	126.779007	190.8921247	31.81415112	133624.4873	-1.3889364	0.306128621	1.695065022	-0.253779424	0.283202993	-177.6455968	-1.881958008	0.745117188	2.627075195	-0.302091413	0.483496761	-211.4639893	1149.545898	1261.68396	112.1380615	1212.545432	26.78611548	848781.8022	0.414307743	0.649960935	0.235653192	0.548531805	0.043026149	383.9722637	11.47	32.42	20.95	21.49	4.55	15046.41	1
0.011768552	359.9624023	359.9506338	175.2024141	167.9155844	123692.9044	-0.777401865	0.323100358	1.100502223	-0.12230051	0.167694736	-86.3441598	-1.374389648	0.655151367	2.029541016	-0.123890474	0.347780957	-87.4666748	1170.508789	1282.716797	112.2080078	1234.361614	24.94420545	871459.2996	0.373229414	0.662740946	0.289511532	0.523016266	0.067015577	369.249484	9.37	29.41	20.04	19.44	4.92	13723.37	1
0.019682843	359.9728699	359.953187	115.3782927	148.7438184	80880.1832	-0.667362809	0.703960061	1.37132287	-0.09199707	0.227905022	-64.48994612	-0.987182617	0.934692383	1.921875	-0.104032639	0.342465455	-72.92687988	1143.799683	1246.787476	102.987793	1198.147154	27.93651494	839901.1549	0.437979192	0.581930637	0.143951446	0.512619455	0.035627203	359.3462377	14.16	30.58	16.42	21.19	3.42	14852.07	1
28.76179314	61.89253235	33.13073921	45.93402536	6.967039774	32475.35593	-0.361199647	0.507941365	0.869141012	0.045732552	0.132727968	32.33291435	-0.827148438	1.323486328	2.150634766	0.059580154	0.379560373	42.12316895	1154.609253	1295.733887	141.1246338	1226.244177	33.43888438	866954.6332	0.344384313	0.586550772	0.24216646	0.510148211	0.049704557	360.6747855	14.91	33.29	18.38	24.86	4.74	17578.15	1
172.6848755	275.7204285	103.035553	218.9264737	23.67216031	154781.0169	-1.082165956	0.314970255	1.397136211	-0.198698879	0.213655605	-140.4801072	-1.736816406	0.542236328	2.279052734	-0.203839465	0.33836275	-144.114502	1156.282715	1265.203491	108.9207764	1218.961246	25.92565952	861805.601	0.396778226	0.647874892	0.251096666	0.538267542	0.056556906	380.5551519	13.47	25.85	12.38	19.57	3.11	13832.93	1
98.21599579	155.8270874	57.61109161	119.0542387	11.45694817	84171.34675	-0.945044518	0.285326362	1.230370879	-0.092308363	0.161957755	-65.26201253	-1.408325195	0.719360352	2.127685547	-0.11195885	0.32397217	-79.15490723	1169.407349	1288.888794	119.4814453	1231.044927	27.19062703	870348.7632	0.415208161	0.636235356	0.221027195	0.532856088	0.055403428	376.7292544	12.44	29.30	16.85	20.53	4.29	14516.25	1
0.101338163	359.9017944	359.8004563	21.0328855	23.14980073	14786.1185	-0.509145439	0.411340803	0.920486242	0.015433032	0.141984418	10.8494218	-0.885253906	1.006958008	1.892211914	-0.008487446	0.352848293	-5.966674805	1129.477417	1271.458618	141.9812012	1197.967203	35.38465271	842170.9438	0.431581259	0.542703271	0.111122012	0.490183617	0.02056973	344.5990825	16.55	32.28	15.73	24.75	3.60	17398.59	1
108.7453613	164.3242188	55.57885742	136.236079	15.36102768	95637.72742	-0.507249892	0.325602412	0.832852304	-0.09152619	0.135367019	-64.25138513	-1.374633789	1.016845703	2.391479492	-0.064192117	0.413241354	-45.06286621	1027.896606	1127.1698	99.27319336	1084.679595	23.61895264	761445.0759	0.444751978	0.658399284	0.213647306	0.539885363	0.039087118	378.999525	9.39	31.46	22.07	18.43	4.46	12941.06	1
202.0468445	327.4711914	125.4243469	311.7256032	9.816323713	219766.5503	-1.668406129	0.312231541	1.98063767	-0.016051064	0.186699513	-11.31599996	-1.930664063	0.868652344	2.799316406	-0.065750187	0.528203412	-46.35388184	1027.908936	1132.627563	104.7186279	1083.984816	24.1136926	764209.2952	0.364498883	0.648665369	0.284166485	0.509609474	0.084259035	359.2746792	4.67	31.42	26.75	18.61	6.33	13121.83	1
25.7258606	342.9941406	317.26828	156.1137444	19.15179198	110372.4173	-1.297066569	0.984237969	2.281304538	0.039098858	0.265608582	27.64289296	-1.602233887	1.49621582	3.098449707	-0.077065906	0.551387631	-54.4855957	1012.971375	1159.331177	146.3598022	1080.387187	40.45779827	763833.7415	0.276629567	0.670974612	0.394345045	0.465616871	0.095730946	329.191128	0.37	38.61	38.24	26.22	6.41	18539.89	1
120.3336945	311.3059387	190.9722443	136.2441125	21.48960882	96188.34341	-0.731817245	0.283449858	1.015267104	0.006354636	0.120776761	4.486373297	-1.04901123	0.512207031	1.561218262	-0.19751331	0.309301603	-139.444397	980.7612915	1109.744629	128.9833374	1028.914193	35.78821838	726413.4199	0.260650188	0.580087841	0.319437653	0.402674753	0.083262885	284.2883756	1.26	34.37	33.11	24.04	8.09	16969.43	1
22.77890396	355.0476379	332.268734	76.8498746	30.85208184	54102.31172	-0.732931972	0.395615846	1.128547817	-0.011255024	0.196850678	-7.923537147	-1.172241211	1.013549805	2.185791016	-0.141804869	0.323273485	-99.83062744	997.9505615	1102.539795	104.5892334	1041.1268	26.27271088	732953.2674	0.32317999	0.503551543	0.180371553	0.436452465	0.037089936	307.2625353	1.25	28.99	27.74	18.77	5.93	13216.77	1
0.070948951	359.782959	359.71201	161.4563196	167.423649	114149.6179	-0.633438587	0.69907701	1.332515597	-0.023151872	0.251821715	-16.36837379	-1.063964844	1.012451172	2.076416016	-0.047491049	0.41903144	-33.57617188	1011.993408	1123.630005	111.6365967	1070.735309	28.48188217	757009.8636	0.385069907	0.567934096	0.182864189	0.498755989	0.032779743	352.6204845	11.71	29.84	18.14	21.37	3.94	15109.32	1
118.8280792	328.0075989	209.1795197	137.2290452	21.438841	96609.24783	-0.535512507	0.281608999	0.817121506	-0.033039443	0.117164128	-23.2597676	-1.43939209	0.648925781	2.088317871	-0.227075143	0.319612687	-159.8609009	965.397644	1074.657837	109.2601929	1004.52731	28.55622043	707187.2261	0.21524027	0.509406745	0.294166476	0.402084949	0.072160716	283.067804	0.28	33.86	33.58	20.26	7.77	14266.24	1
87.14672852	117.2121964	30.06546783	102.7535776	6.300977334	72646.77937	-0.350022018	0.661309004	1.011331022	-0.033787368	0.121191307	-23.88766923	-1.129516602	0.939819336	2.069335938	-0.10211691	0.330613976	-72.19665527	1072.382935	1209.60791	137.2249756	1138.841976	34.74295791	805161.2769	0.402120709	0.550810099	0.148689389	0.465861191	0.034130694	329.3638622	18.40	33.76	15.36	25.25	3.51	17849.30	1
62.96622086	147.1910248	84.22480392	104.5468447	20.99326853	73496.43181	-0.554905295	0.252376795	0.80728209	-0.192388251	0.153554797	-135.2489407	-0.924194336	0.552978516	1.477172852	-0.236596402	0.235316376	-166.3272705	1082.148926	1191.695435	109.5465088	1141.911678	27.11011674	802763.9098	0.420356333	0.58377105	0.163414717	0.511546272	0.042536143	359.6170293	14.51	26.21	11.70	20.90	2.19	14689.34	1
65.57675934	142.2348785	76.6581192	112.6173453	18.12076398	78944.75909	-0.852789044	0.475327522	1.328116566	-0.199754901	0.220132804	-140.0281853	-0.903442383	0.766479492	1.669921875	-0.269986968	0.271905463	-189.2608643	1157.981934	1304.178345	146.1964111	1230.941724	38.47093526	862890.1486	0.411675543	0.667548537	0.255872995	0.514461126	0.055006869	360.6372491	21.04	33.76	12.72	27.76	3.27	19460.10	1
264.1156616	320.8436279	56.72796631	290.5730277	14.80823195	205144.5576	-0.611822426	0.386595428	0.998417854	-0.128819768	0.176509409	-90.94675647	-0.885742188	0.622192383	1.50793457	-0.139660368	0.232023791	-98.60021973	1183.63269	1319.236572	135.6038818	1256.01092	35.53345009	886743.7097	0.468408614	0.620267987	0.151859373	0.524174177	0.028565725	370.066969	21.81	30.68	8.88	26.31	2.01	18573.49	1
89.04976654	167.4129791	78.36321259	141.8373703	15.2656354	100279.0208	-1.042379618	0.397519916	1.439899534	-0.16498979	0.234741151	-116.6477816	-1.372192383	0.580444336	1.952636719	-0.244234379	0.305294365	-172.6737061	1149.846436	1293.077393	143.230957	1217.977549	36.39466271	861110.1272	0.402027488	0.560438454	0.158410966	0.488839399	0.028374113	345.6094553	17.62	31.92	14.30	26.17	3.29	18502.23	1
142.9394379	216.9973145	74.05787659	176.3534661	17.30380315	123800.1332	-0.402741432	1.187281489	1.590022922	-0.122580468	0.165629926	-86.05148847	-1.209960938	1.444458008	2.654418945	-0.273191273	0.416531071	-191.7802734	1127.460815	1243.769897	116.309082	1172.350152	32.65249537	822989.8066	0.174901277	0.602970123	0.428068846	0.403808408	0.107364883	283.4735022	3.84	35.10	31.27	22.90	8.82	16076.05	1
0.422930032	359.8973694	359.4744394	36.26428912	64.33286687	25457.53097	-1.543427467	0.429876059	1.973303527	-0.05340725	0.239341816	-37.4918896	-1.965820313	0.929321289	2.895141602	-0.135237648	0.434695437	-94.93682861	993.114502	1098.200684	105.0861816	1046.436438	27.58949542	734598.3793	0.37344867	0.652755558	0.279306889	0.501728676	0.062287924	352.2135308	4.15	29.88	25.73	20.31	4.81	14256.45	1
0.068674214	359.8751221	359.8064479	257.0240839	149.0496493	180430.9069	-0.50427115	0.506997526	1.011268675	-0.080672123	0.155379729	-56.63183006	-0.664916992	0.829101563	1.494018555	0.022912615	0.299047587	16.08465576	1006.679688	1129.025757	122.3460693	1076.469621	31.60261984	755681.6743	0.428582519	0.774114192	0.345531672	0.561682869	0.054030914	394.3013741	8.67	33.50	24.83	23.09	3.49	16211.71	1
202.6425018	228.5249786	25.88247681	211.2908705	4.651348712	149593.9363	-0.333115727	0.315205455	0.648321182	0.009016477	0.109575266	6.383665939	-0.860473633	0.626220703	1.486694336	0.045731022	0.249392105	32.37756348	1037.012085	1165.912354	128.9002686	1105.816305	30.57124733	782917.9436	0.335620493	0.603167593	0.267547101	0.513006261	0.056120304	363.2084328	14.50	31.04	16.54	22.48	3.53	15913.61	1
170.042572	218.7594757	48.71690369	189.4353768	9.983186373	133741.376	-0.606495738	0.50948	1.115975738	0.016547872	0.18882427	11.68279758	-1.621643066	1.111450195	2.733093262	0.097009675	0.375306909	68.48883057	1023.841736	1130.901245	107.0595093	1086.367063	27.36694031	766975.1465	0.412434846	0.649088681	0.236653835	0.541433116	0.044308433	382.2517801	8.95	32.29	23.34	19.73	4.94	13929.72	1
0.050390273	359.9815369	359.9311466	298.4669199	127.8105487	211016.1124	-0.407922655	0.602615297	1.010537952	0.020780483	0.147080045	14.69180155	-0.886779785	1.037963867	1.924743652	-0.059305366	0.337418528	-41.92889404	979.6337891	1099.164063	119.5302734	1035.432867	33.28592207	732051.0367	0.261705399	0.598635614	0.336930215	0.440058938	0.076657008	311.121669	5.64	30.13	24.49	23.49	4.07	16606.24	1
0.014645482	359.8858948	359.8712493	187.7188786	175.2660207	132529.5283	-0.341732889	0.344601452	0.686334342	0.033986678	0.106358111	23.99459478	-0.78729248	0.882080078	1.669372559	0.04664253	0.317729508	32.92962646	995.0710449	1100.952148	105.8811035	1047.593928	30.07625619	739601.3132	0.301892102	0.681984544	0.380092442	0.474769783	0.094900346	335.1874669	5.20	27.68	22.47	20.69	3.91	14609.90	1
165.4989777	255.1059723	89.60699463	193.5775516	8.618626397	136665.7515	-0.72035253	0.328431278	1.048783809	0.036276716	0.093838047	25.61136143	-0.787475586	0.669189453	1.456665039	-0.004944021	0.292253589	-3.490478516	1026.323486	1097.843994	71.52050781	1058.367074	20.11585525	747207.1544	0.211057693	0.59234482	0.381287128	0.407697023	0.09440771	287.8340984	1.09	20.05	18.96	14.43	3.37	10184.10	1
12.41849613	329.8300781	317.411582	143.0346888	62.82197504	101268.5597	-1.315270782	0.342467904	1.657738686	-0.051360242	0.203408797	-36.36305101	-1.703369141	0.975585938	2.678955078	-0.227282594	0.544666529	-160.9160767	1023.625427	1091.529297	67.90386963	1055.517595	18.93761331	747306.457	0.349359483	0.69215852	0.342799038	0.474890103	0.073894285	336.222193	0.51	26.05	25.54	15.55	5.77	11006.97	1
169.4599304	260.5338135	91.07388306	228.9844969	18.84125209	162350.0083	-0.868586481	0.249742061	1.118328542	-0.154732665	0.216843914	-109.7054593	-1.141967773	0.604248047	1.74621582	-0.130997285	0.352801477	-92.8770752	1251.665527	1376.413818	124.748291	1321.981005	32.48620266	937284.5323	0.467679262	0.655059159	0.187379897	0.544100887	0.039800796	385.7675291	13.31	32.55	19.25	23.31	4.57	16526.11	1
185.2277679	260.7675476	75.53977966	221.2322394	23.81070923	156411.1932	-0.361985087	0.888128638	1.250113726	0.150336515	0.287338503	106.2879158	-0.702636719	1.471801758	2.174438477	0.275839367	0.386089445	195.0184326	1255.694458	1389.953735	134.2592773	1327.867903	35.52099051	938802.6073	0.403757691	0.679071426	0.275313735	0.540001436	0.06025999	381.7810155	13.66	34.28	20.62	25.99	5.92	18376.88	1
105.833725	134.1075897	28.27386475	118.9636452	6.412935227	84107.29716	-0.320840657	0.308618635	0.629459292	0.003393047	0.099079364	2.398884319	-0.690979004	0.652526855	1.343505859	-0.099243941	0.2610455	-70.16546631	977.3171997	1065.578857	88.26165771	1014.05144	21.73255168	716934.368	0.331102669	0.542671025	0.211568356	0.43507139	0.039295005	307.5954731	4.84	25.37	20.53	16.57	4.14	11714.85	1
170.7563934	196.4580536	25.70166016	178.8235064	5.106563906	125712.925	-0.227643341	0.51468581	0.74232915	0.058927197	0.100487793	41.4258194	-0.662109375	1.025878906	1.687988281	-0.003618004	0.300637033	-2.543457031	1099.80896	1264.295776	164.4868164	1174.237977	40.32603067	825489.2979	0.420716882	0.545203507	0.124486625	0.47613635	0.026185193	334.7238543	22.36	37.87	15.51	28.42	3.62	19976.89	1
194.9861145	236.6537781	41.66766357	215.8619636	9.387022513	152182.6843	-0.355122834	0.475752771	0.830875605	0.017248611	0.122944011	12.16027053	-0.845397949	0.916748047	1.762145996	-0.13818723	0.310030704	-97.42199707	948.428894	1045.804688	97.37579346	986.0992688	27.19571247	695199.9845	0.164636359	0.50381422	0.339177862	0.372886332	0.101348142	262.8848643	2.38	29.40	27.02	18.97	6.44	13373.52	1
2.178910971	343.3773193	341.1984084	106.2250291	22.00515864	74888.64553	-1.254957199	0.639802456	1.894759655	0.028407731	0.233732158	20.02745034	-2.082702637	1.199645996	3.282348633	-0.00371795	0.525279037	-2.621154785	965.8341675	1051.192505	85.3583374	1011.576339	22.15206968	713161.3193	0.375868976	0.639127433	0.263258457	0.5056399	0.060626312	356.4761295	0.96	29.60	28.64	16.90	5.03	11911.94	1
57.94966125	117.6394882	59.68982697	84.42969766	15.4228393	59522.93685	-0.515678048	0.625648618	1.141326666	-0.057944822	0.198995206	-40.85109956	-0.728393555	0.913452148	1.641845703	-0.040833299	0.333721808	-28.78747559	1048.341553	1148.926758	100.5852051	1103.562473	24.61033665	778011.5436	0.393900305	0.608554482	0.214654177	0.519578298	0.052338054	366.3027003	13.08	29.20	16.12	19.82	3.92	13970.82	1
211.461441	238.3624573	26.90101624	226.7969559	6.213179319	159665.057	-0.432806373	0.414392978	0.847199351	0.006280364	0.147419716	4.421376354	-0.770019531	1.040649414	1.810668945	0.0755154	0.353557068	53.1628418	1167.007935	1298.788208	131.7802734	1241.164575	35.03158335	873779.8608	0.420829684	0.626425803	0.205596119	0.521025188	0.046638462	366.801732	11.41	31.60	20.19	24.21	5.22	17047.23	1
216.4433441	301.5962524	85.15290833	254.4076305	17.30939167	180375.01	-0.530761719	0.699815691	1.230577409	-0.099389394	0.197815025	-70.46708006	-0.991333008	0.829833984	1.821166992	-0.188210728	0.34519681	-133.4414063	1152.021729	1258.450439	106.4287109	1206.038918	24.88699554	855081.5931	0.38649708	0.598900497	0.212403417	0.493433587	0.051313445	349.8444134	13.57	32.16	18.60	19.89	3.63	14101.54	1
244.9542084	280.2621155	35.3079071	262.7361775	7.088125044	185754.4775	-0.44095999	0.406375349	0.847335339	0.035106105	0.159993762	24.82001623	-0.802978516	1.296875	2.099853516	0.075583279	0.342047183	53.43737793	1141.310425	1284.391113	143.0806885	1212.63468	36.66431182	857332.719	0.413477749	0.762162268	0.34868452	0.522282762	0.065744795	369.253913	11.87	32.97	21.11	25.56	2.91	18071.86	1
184.9445648	269.9584351	85.01387024	225.8043687	21.03189138	159643.6887	-0.563105583	0.727889001	1.290994585	0.114830457	0.222355766	81.18513313	-0.970703125	1.116577148	2.087280273	0.151246498	0.411356771	106.9312744	1152.996704	1256.113525	103.1168213	1203.12244	25.30571017	850607.5654	0.355680078	0.58476454	0.229084462	0.510153975	0.04683047	360.6788606	9.56	30.56	21.00	21.44	5.26	15157.63	1
179.6287231	214.312088	34.68336487	196.6741458	5.387698223	138261.9245	-0.371167243	0.544674158	0.915841401	0.030965052	0.138214359	21.76843138	-0.944702148	1.053710938	1.998413086	0.042382014	0.315936777	29.79455566	1150.326538	1275.875977	125.5494385	1212.612095	30.03318876	852466.3029	0.412818611	0.643663645	0.230845034	0.509563171	0.043070148	358.222909	15.71	29.46	13.75	22.85	3.28	16063.20	1
0.02026586	359.9715881	359.9513223	234.7443171	153.7243624	165494.7436	-0.813121498	0.61667794	1.429799438	-0.118630317	0.311536882	-83.63437367	-1.035644531	0.854125977	1.889770508	-0.082868254	0.411096537	-58.42211914	1091.547119	1232.257202	140.710083	1169.052118	35.88128675	824181.7429	0.406957269	0.619852483	0.212895215	0.520718929	0.038666377	367.1068449	18.63	30.35	11.72	25.48	2.66	17966.22	1
135.5551147	184.1674194	48.61230469	157.7352869	10.55301031	111676.5831	-0.529241025	0.743452668	1.272693694	-0.014369153	0.229610504	-10.17336014	-1.371337891	1.348510742	2.719848633	0.07087423	0.499675158	50.17895508	1168.081787	1295.094116	127.0123291	1234.393287	33.8457495	873950.4473	0.434165299	0.79808253	0.363917232	0.540026111	0.080268695	382.3384867	3.07	32.86	29.78	23.91	5.03	16928.42	1
0.009366535	359.9378662	359.9284997	58.30557311	118.0073544	40930.51232	-0.48179993	0.569064975	1.050864905	0.028948893	0.161671876	20.32212261	-0.891235352	0.819091797	1.710327148	-0.05366277	0.296638538	-37.67126465	1116.228394	1233.860352	117.631958	1167.878429	30.91123038	819850.657	0.404113889	0.528611183	0.124497294	0.452489075	0.021505152	317.6473303	11.65	32.88	21.24	22.39	4.39	15720.64	1
160.4544373	205.6521759	45.19773865	179.3545163	8.272440687	126803.643	-0.422715724	0.776742458	1.199458182	0.066171638	0.208576986	46.78334827	-0.99230957	1.624023438	2.616333008	0.150767023	0.467021541	106.5922852	1152.585938	1294.703491	142.1175537	1225.245822	37.52438518	866248.796	0.401628166	0.712320566	0.3106924	0.516831536	0.063108798	365.3998958	7.31	34.40	27.09	26.44	4.09	18693.28	1
57.19182968	140.2076874	83.0158577	86.56460202	16.47788462	60941.47982	-1.033492565	0.40230909	1.435801655	-0.167778646	0.221474392	-118.1161668	-1.569824219	0.777709961	2.34753418	-0.216521176	0.412437321	-152.4309082	1139.473511	1258.586548	119.1130371	1201.988553	30.8349544	846199.9413	0.4275603	0.655535936	0.227975637	0.51671128	0.04391537	363.764741	13.05	32.13	19.08	22.57	3.61	15891.49	1
27.46810722	175.2414551	147.7733479	81.44088797	29.52959808	57578.7078	-1.230152726	0.50869298	1.738845706	-0.260892561	0.324939773	-184.4510403	-1.930053711	0.940063477	2.870117188	-0.34494066	0.535058862	-243.8730469	1135.219604	1246.290649	111.0710449	1193.42469	28.72993237	843751.2557	0.428324938	0.60134542	0.173020482	0.515581539	0.039570101	364.5161481	10.87	31.59	20.71	21.63	4.37	15290.02	1
13.39036942	114.1225662	100.7321968	77.64060846	23.2194445	54736.62897	-0.802891254	0.359428972	1.162320226	-0.172851967	0.223983604	-121.8606364	-1.341796875	0.542236328	1.884033203	-0.269281742	0.319108823	-189.8436279	1156.131104	1277.113647	120.9825439	1217.839895	28.72154658	858577.126	0.405185789	0.579502106	0.174316317	0.492942372	0.032467765	347.5243724	16.18	31.38	15.21	22.63	2.87	15952.17	1
0.042753499	359.9684753	359.9257218	250.5709204	131.1267621	177153.6407	-0.827465236	0.358166933	1.185632169	-0.150647947	0.202067751	-106.5080987	-1.25769043	0.591796875	1.849487305	-0.195124474	0.321193745	-137.9530029	1129.052368	1233.229126	104.1767578	1181.83675	26.18373897	835558.5823	0.434285074	0.658487916	0.224202842	0.494914034	0.046682055	349.904222	10.79	27.31	16.53	20.85	3.89	14744.36	1
0.302243203	359.8645935	359.5623503	321.1563355	63.49453955	226094.0602	-0.425597787	0.51721853	0.942816317	-0.045250372	0.190358327	-31.85626214	-1.136108398	0.781738281	1.91784668	-0.095750462	0.351269494	-67.4083252	1149.516846	1244.712036	95.19519043	1198.161402	22.67884498	843505.6273	0.386823058	0.611012459	0.224189401	0.493646955	0.055869078	347.5274565	14.38	31.44	17.06	18.30	3.27	12885.17	1
239.1430511	330.5030823	91.36003113	280.9124676	25.0835198	198605.1146	-0.985651314	0.382477969	1.368129283	-0.183158838	0.228194363	-129.4932984	-1.462768555	0.934448242	2.397216797	-0.263754924	0.38790546	-186.4747314	1153.946045	1261.55481	107.6087646	1209.522029	26.68677851	855132.0746	0.423915356	0.613722622	0.189807266	0.512682659	0.035629178	362.4666402	13.51	30.46	16.95	20.87	3.70	14755.18	1
236.3617859	342.0599976	105.6982117	277.433937	24.30385232	195036.0577	-0.692773938	0.539734304	1.232508242	-0.169727592	0.195880831	-119.3184972	-1.215087891	0.808105469	2.023193359	-0.21543639	0.352810217	-151.4517822	1111.659668	1218.46936	106.8096924	1164.846204	26.3310458	818886.8817	0.443775773	0.647612453	0.203836679	0.516333756	0.042246067	362.9826304	7.95	26.94	18.98	20.14	3.97	14158.98	1
0.011629476	359.2501526	359.2385231	55.08344052	96.72356637	38723.65868	-0.65740484	0.966697454	1.624102294	-0.097667626	0.296401834	-68.66034126	-1.138793945	1.788696289	2.927490234	-0.117417228	0.461091291	-82.54431152	1145.554199	1273.780762	128.2265625	1209.691632	33.70710783	850413.2172	0.392787427	0.634057224	0.241269797	0.506127271	0.046713719	355.8074714	16.33	32.15	15.83	25.24	3.49	17747.17	1
129.0162506	187.901535	58.88528442	156.131375	12.78295547	109604.2253	-0.721747518	0.632336497	1.354084015	0.013339626	0.257883832	9.364417643	-1.065673828	1.168945313	2.234619141	-0.061687589	0.432957713	-43.3046875	1138.078979	1269.070068	130.9910889	1198.227143	33.50282653	841155.4541	0.380833834	0.573316455	0.19248262	0.469882346	0.04334856	329.8574069	13.88	35.83	21.95	24.52	5.09	17215.06	1
99.65423584	201.0190735	101.3648376	147.2082409	32.60236585	103929.0181	-1.051246166	0.410235226	1.461481392	-0.226392529	0.297531409	-159.8331252	-1.366943359	0.864990234	2.231933594	-0.310234437	0.448724135	-219.0255127	1157.029541	1287.376831	130.34729	1225.591914	29.41102728	865267.8914	0.436274141	0.659278572	0.223004431	0.536511696	0.044882739	378.7772576	16.69	34.43	17.74	24.75	4.17	17473.01	1
140.3668213	265.1601257	124.7933044	204.4709356	18.446927	144560.9515	-0.744077921	0.542202413	1.286280334	-0.150207049	0.228830508	-106.1963834	-1.019165039	1.25378418	2.272949219	-0.027090976	0.562287546	-19.15332031	1182.682739	1311.200317	128.5175781	1254.857499	36.30912421	887184.252	0.41836533	0.829166889	0.41080156	0.572045789	0.109789624	404.4363727	1.27	35.35	34.07	24.06	7.14	17010.22	1
277.8737793	303.3401794	25.46640015	291.3029834	4.17235127	206242.5122	-0.359722644	0.439651459	0.799374104	-0.009432748	0.117646132	-6.678385754	-0.937133789	1.018188477	1.955322266	-0.035974018	0.341287748	-25.46960449	1162.982788	1294.800049	131.8172607	1224.657692	34.74400292	867057.646	0.430402607	0.581089377	0.150686771	0.481883523	0.036678947	341.1735345	15.64	33.64	18.00	24.32	4.06	17218.95	1
0.33413893	359.9646301	359.6304912	81.95727674	113.9282364	57779.8801	-0.948824584	0.774378717	1.723203301	-0.169579691	0.242614732	-119.5536821	-1.342651367	0.94909668	2.291748047	-0.298596105	0.344080334	-210.5102539	1141.973999	1247.518555	105.5445557	1189.572425	24.68649324	838648.5598	0.372202367	0.607845485	0.235643119	0.494697792	0.050609732	348.7619437	9.45	33.74	24.29	19.74	4.60	13915.89	1
50.90353012	158.3015747	107.3980446	124.6247973	22.92938608	87486.60773	-1.020449042	0.440468937	1.460917979	-0.209289256	0.272369911	-146.921058	-1.679199219	1.040771484	2.719970703	-0.234524023	0.462554988	-164.6358643	1140.120361	1254.911743	114.7913818	1201.59416	29.13198246	843519.1	0.415731609	0.650043786	0.234312177	0.527603397	0.054427362	370.3775846	8.63	27.24	18.61	21.06	3.88	14783.55	1
44.06482697	121.9077988	77.8429718	85.37837358	18.19734384	59935.61826	-0.700321496	0.462389231	1.162710726	-0.146323874	0.165896387	-102.7193599	-1.251831055	0.565551758	1.817382813	-0.223195307	0.348672028	-156.6831055	1142.736694	1251.592896	108.8562012	1196.239277	26.73479783	839759.9723	0.405717641	0.62037313	0.214655489	0.504616665	0.04791127	354.2408986	13.81	34.91	21.11	20.33	4.16	14268.19	1
72.72111511	114.0018692	41.28075409	92.87941814	9.850896865	65665.74863	-0.535766602	0.528133869	1.063900471	-0.021695784	0.177876079	-15.33891927	-0.883056641	0.924560547	1.807617188	-0.067011767	0.344287643	-47.37731934	1139.507568	1263.450928	123.9433594	1194.623626	30.79953262	844598.9034	0.414313138	0.571441948	0.157128811	0.49109852	0.036334234	347.2066534	15.05	32.82	17.78	23.40	4.37	16542.79	1
189.1703949	245.1159058	55.94551086	216.5454263	9.031660974	153530.7073	-0.553835213	0.274858922	0.828694135	-0.039517944	0.14619442	-28.01822248	-0.787963867	0.543457031	1.331420898	-0.04388488	0.211490307	-31.11437988	1109.400024	1186.15271	76.75268555	1146.436601	20.58661232	812823.5498	0.436848044	0.612741351	0.175893307	0.510522778	0.029578782	361.9606499	9.17	18.66	9.50	14.94	1.85	10594.06	1
0.059778795	359.9189148	359.859136	248.7371123	137.8465669	174862.1899	-0.913628519	0.421336859	1.334965378	-0.206113207	0.283894823	-144.8975849	-1.239868164	1.058349609	2.298217773	-0.291311164	0.437543842	-204.791748	1153.901245	1277.137207	123.2359619	1208.796346	28.49806975	849783.8309	0.396873087	0.627456188	0.230583102	0.510334623	0.050705102	358.7652399	13.33	34.30	20.97	22.55	4.86	15851.83	1
148.8179626	203.6230927	54.80513	169.287186	12.4847288	119855.3277	-0.726412237	0.737459004	1.463871241	-0.056581304	0.219719061	-40.05956337	-1.088134766	0.923950195	2.012084961	-0.087444586	0.308661149	-61.9107666	1149.942261	1271.861816	121.9195557	1208.728009	30.02912869	855779.4307	0.438656449	0.640541375	0.201884925	0.508760435	0.030670847	360.2023882	15.73	29.88	14.15	23.16	3.15	16400.29	1
165.0184479	262.9143982	97.89595032	198.4074927	24.32361504	140670.9123	-0.839641988	0.558099985	1.397741973	-0.098300502	0.23328464	-69.6950561	-1.123413086	1.007446289	2.130859375	-0.055703146	0.455096835	-39.49353027	1169.881226	1287.446167	117.5649414	1233.160743	29.48820187	874310.967	0.41962254	0.639100373	0.219477832	0.522254487	0.045764356	370.2784313	7.09	30.72	23.62	20.75	6.06	14715.15	1
108.6660309	130.6226654	21.95663452	117.6751906	4.768053635	82961.00934	-0.599082828	0.397899479	0.996982306	0.009563882	0.149038706	6.742536818	-0.94128418	0.747924805	1.689208984	-0.047419035	0.281088811	-33.43041992	1102.420776	1247.777222	145.3564453	1170.160534	36.56575656	824963.1766	0.42073071	0.639419854	0.218689144	0.485502651	0.044279085	342.2793689	20.72	33.28	12.56	26.21	3.07	18475.60	1
0.13179183	359.7944031	359.6626112	118.7262766	139.7863767	84058.2038	-0.916508138	0.526722312	1.44323045	-0.239312897	0.266504647	-169.4335313	-1.313842773	1.211791992	2.525634766	-0.196411995	0.464024204	-139.0596924	1180.670166	1317.109375	136.439209	1259.667134	35.64203746	891844.3312	0.46747762	0.738045633	0.270568013	0.586028674	0.068148136	414.9083008	15.87	36.78	20.91	25.91	4.92	18345.25	1
239.9763794	288.287323	48.3109436	268.0208339	9.977858646	187614.5837	-0.593412757	0.498419851	1.091832608	-0.078470413	0.207957872	-54.92928876	-0.981201172	0.762695313	1.743896484	-0.131867153	0.312572616	-92.30700684	1116.12207	1235.080933	118.9588623	1173.804918	30.14919392	821663.4424	0.436252028	0.571679771	0.135427743	0.49925085	0.026719414	349.4755952	16.64	32.05	15.41	21.93	2.80	15352.24	1
110.8431931	138.1452026	27.30200958	125.980835	6.650167325	88564.52699	-0.229097471	0.349825978	0.578923449	0.044050984	0.100650615	30.96784166	-0.728515625	0.939697266	1.668212891	0.115819201	0.311898424	81.42089844	1148.60376	1285.240723	136.6369629	1221.132249	37.18290011	858455.9713	0.472687453	0.671913922	0.199226469	0.538767505	0.047902199	378.7535558	16.50	32.47	15.97	25.31	4.51	17794.20	1
313.4161377	354.3805542	40.9644165	333.9224321	9.32522063	236417.0819	-0.380304515	0.680709779	1.061014295	0.081364685	0.162959063	57.60619682	-1.183105469	1.110107422	2.293212891	0.057713395	0.376517533	40.86108398	1145.106079	1292.045776	146.9396973	1212.175266	37.95004037	858220.0884	0.391694695	0.602356076	0.210661381	0.484670143	0.039394467	343.1464613	19.29	33.88	14.60	27.17	3.52	19238.07	1
0.009514539	359.9563293	359.9468148	341.1043355	34.48126574	241160.7652	-0.417715758	0.423689097	0.841404855	-0.018940219	0.153204748	-13.39073515	-1.032470703	0.892456055	1.924926758	-0.008784228	0.303996572	-6.210449219	1127.826904	1261.348389	133.5214844	1195.246355	35.35042493	845039.173	0.413135737	0.572523952	0.159388214	0.495565732	0.025915943	350.3649722	18.20	32.95	14.74	25.39	3.04	17948.12	1
0.181623563	359.4722595	359.290636	320.0415808	33.82287469	225309.2729	-0.976445377	0.449078918	1.425524294	-0.147128433	0.187395898	-103.5784169	-1.099731445	1.212158203	2.311889648	-0.139153741	0.356572756	-97.9642334	1188.801147	1331.394043	142.5928955	1264.479498	33.76673911	890193.5663	0.443866372	0.649571002	0.205704629	0.533000449	0.037020106	375.2323161	18.31	32.69	14.38	25.26	3.47	17785.76	1
0.029030217	359.9932861	359.9642559	217.7077336	158.0375489	153483.9522	-0.619200408	0.379816264	0.999016672	-0.155958183	0.216035662	-109.9505187	-1.140991211	1.079101563	2.220092773	-0.224152953	0.424726583	-158.027832	1148.520874	1293.685913	145.1650391	1211.310022	38.06496202	853973.5657	0.370862663	0.746287644	0.375424981	0.506844372	0.086618869	357.3252819	12.12	37.37	25.24	26.72	6.90	18836.91	1
78.5460968	108.5795364	30.03343964	92.94479274	5.553914408	65619.02367	-0.329493999	0.611163795	0.940657794	0.024767202	0.14088925	17.48564457	-0.876098633	0.924316406	1.800415039	0.012628917	0.320601332	8.916015625	1163.16687	1313.435913	150.269043	1239.469872	38.47701781	875065.73	0.345892161	0.667306602	0.321414441	0.505747353	0.058028426	357.057631	20.48	35.17	14.69	27.31	3.18	19283.59	1
74.90151978	156.6069183	81.70539856	112.5142688	25.7756489	79097.53094	-0.543865263	0.420380086	0.964245349	-0.126575466	0.18942726	-88.98255287	-0.988037109	0.849121094	1.837158203	-0.204307328	0.359143098	-143.6280518	1181.759888	1293.193604	111.4337158	1240.640617	28.35906616	872170.3536	0.425087154	0.596574008	0.171486855	0.511435681	0.031718232	359.5392836	13.36	31.69	18.33	22.28	4.26	15663.33	1
83.69365692	114.688179	30.99452209	103.9185226	6.917343123	73158.63992	-0.609849334	0.387257069	0.997106403	-0.034172918	0.186957195	-24.05773443	-0.82409668	1.231445313	2.055541992	-0.03646209	0.419616948	-25.66931152	1126.168701	1300.334839	174.1661377	1207.987093	46.04212904	850422.9135	0.426874906	0.745278955	0.318404049	0.510830915	0.082442919	359.624964	19.21	37.36	18.15	30.76	4.50	21653.32	1
143.1853485	165.787384	22.60203552	152.2004302	4.32779477	106844.702	-0.333746523	0.37116313	0.704909652	0.02667731	0.111577359	18.72747166	-0.755493164	1.297729492	2.053222656	0.117281922	0.455342253	82.33190918	1137.106445	1308.43689	171.3304443	1223.062912	47.50534191	858590.1642	0.400929779	0.782725036	0.381795257	0.521648404	0.101308949	366.1971796	5.54	38.03	32.49	30.87	5.57	21670.66	1
89.75476837	138.5200195	48.76525116	111.8158471	8.551681913	79053.80387	-0.425306886	0.496293277	0.921600163	0.017900547	0.168218328	12.65568666	-0.820800781	0.902587891	1.723388672	-0.122226569	0.315653492	-86.41418457	1114.655396	1237.462891	122.8074951	1163.312818	29.4077403	822462.1626	0.370749891	0.518760979	0.148011088	0.439959583	0.031267049	311.0514254	12.77	35.36	22.59	22.01	6.03	15562.29	1
101.9596176	127.0561142	25.09649658	112.1943845	5.430701901	78984.8467	-0.256241202	0.198406115	0.454647318	-0.03021189	0.092002558	-21.26917057	-0.850708008	0.713012695	1.563720703	-0.037197633	0.342752378	-26.18713379	1140.098755	1272.556396	132.4576416	1202.965957	34.67838009	846888.0341	0.414580405	0.605614185	0.191033781	0.490035309	0.038977115	344.9848576	15.89	34.62	18.73	24.46	4.91	17217.34	1
87.77346802	116.0044403	28.23097229	97.04703271	4.908379454	68612.25213	-0.331362307	0.387051433	0.71841374	0.012556	0.12159622	8.877092132	-0.69519043	0.763305664	1.458496094	0.039091161	0.302189575	27.63745117	1147.53186	1289.775879	142.2440186	1221.309947	37.5935476	863466.1323	0.411341369	0.633126795	0.221785426	0.51146612	0.046155742	361.606547	20.07	33.91	13.84	26.03	3.61	18404.06	1
305.6216736	336.2652283	30.64355469	319.9487202	7.310509395	224923.9503	-0.42383042	0.523451567	0.947281986	0.084369566	0.154974326	59.31180496	-0.872192383	0.775878906	1.648071289	0.127925346	0.280835704	89.93151855	1126.734375	1286.004272	159.2698975	1210.757783	40.9283152	851162.7214	0.404658586	0.583973706	0.17931512	0.51519668	0.031282459	362.1832658	22.06	33.90	11.84	28.81	3.46	20255.20	1
113.6151352	136.5263977	22.91126251	125.2242696	3.822589446	88408.33431	-0.220530897	0.321926892	0.542457789	0.046196989	0.090636504	32.61507458	-0.669067383	0.856201172	1.525268555	0.076319362	0.269324294	53.88146973	1179.578491	1322.403198	142.824707	1254.009515	35.69268143	885330.7173	0.420577288	0.580253661	0.159676373	0.51088461	0.0372655	360.6845346	19.06	33.07	14.01	25.61	3.52	18078.85	1
271.888916	292.6985168	20.80960083	283.0526799	4.486428953	199835.192	-0.715403795	0.429414332	1.144818127	-0.026226952	0.17015952	-18.51622797	-1.181152344	0.790649414	1.971801758	-0.084950217	0.344739252	-59.97485352	1123.666992	1282.691772	159.0247803	1199.718821	41.42181443	847001.4879	0.312724918	0.660402179	0.347677261	0.480711638	0.0706572	339.3824166	14.73	34.15	19.43	28.14	3.26	19866.77	1
292.0464172	332.5762939	40.52987671	317.3334112	9.624304537	224037.3883	-0.753849924	1.15892756	1.912777483	0.084954279	0.364570067	59.97772114	-1.068847656	1.766235352	2.835083008	0.154333012	0.515646724	108.9591064	1124.288086	1295.390259	171.1021729	1211.656256	45.07233186	855429.317	0.40068838	0.720823407	0.320135027	0.508261584	0.074912797	358.8326781	17.17	37.45	20.28	31.07	3.51	21936.69	1
3.912418842	359.3927307	355.4803119	178.4565604	46.70366963	126168.7882	-0.859586895	0.616090834	1.475677729	-0.058885336	0.299141926	-41.63193259	-1.061157227	1.100585938	2.161743164	0.174563137	0.433986621	123.4161377	1386.279053	1506.77771	120.4986572	1468.665039	32.21071899	1038346.182	0.444215238	0.803476095	0.359260857	0.630821533	0.089377386	445.990824	0.87	35.62	34.75	21.71	9.74	15347.07	1
104.1915894	189.8098907	85.61830139	149.2709049	20.49436125	105534.5297	-1.077923417	0.824160457	1.902083874	-0.109825184	0.258868948	-77.64640479	-1.537353516	1.292358398	2.829711914	-0.084205034	0.398164353	-59.53295898	1223.217896	1322.067993	98.85009766	1279.422452	24.80173989	904551.6735	0.405008256	0.610333622	0.205325365	0.533031484	0.041949143	376.8532588	11.35	30.23	18.88	19.91	4.11	14076.45	1
128.5648041	213.7006378	85.13583374	142.707207	13.50068174	100893.9953	-1.122341871	0.341707289	1.46404916	-0.093214002	0.235843466	-65.90229968	-1.323974609	0.76550293	2.089477539	-0.173219327	0.364086672	-122.4660645	1113.933594	1237.518555	123.5849609	1168.791482	29.37164783	826335.5781	0.404163778	0.660417974	0.256254196	0.512446851	0.056729301	362.2999236	12.96	31.37	18.41	21.83	4.76	15436.25	1
185.4147186	219.1436462	33.72892761	206.163809	9.519487354	145345.4853	-0.440082401	0.193195924	0.633278325	-0.059048548	0.139631823	-41.62922646	-0.733642578	0.505981445	1.239624023	-0.061661784	0.240945812	-43.47155762	1054.881592	1185.425049	130.543457	1120.612112	35.14610761	790031.5388	0.406915367	0.565742075	0.158826709	0.496972801	0.032954221	350.3658251	17.73	30.81	13.08	24.54	3.26	17300.38	1
141.7789917	197.1695251	55.39053345	173.193017	15.83119902	121581.498	-0.560269833	0.282227486	0.842497319	-0.107304085	0.148403844	-75.32746758	-1.008911133	0.760253906	1.769165039	-0.138763515	0.30268398	-97.4119873	1189.133545	1301.521729	112.3881836	1249.527916	26.87722229	877168.5968	0.370987296	0.612565517	0.241578221	0.512365334	0.055586758	359.6804648	15.03	28.76	13.74	21.12	3.01	14826.80	1
109.7413406	178.2387543	68.49741364	144.455084	15.37367775	101985.2893	-0.626343191	0.515377522	1.141720712	-0.079627091	0.183615183	-56.21672625	-0.989013672	0.753417969	1.742431641	-0.129803104	0.280184936	-91.64099121	1038.080078	1148.796875	110.7167969	1091.488309	29.59234421	770590.7461	0.400900483	0.602655888	0.201755404	0.499970024	0.048933403	352.9788373	12.79	29.31	16.53	21.68	4.27	15305.08	1
115.3496323	236.0339966	120.6843643	138.3182099	16.43127546	96961.06516	-1.483602047	0.455582857	1.939184904	-0.101732853	0.316804189	-71.31473027	-1.788024902	0.954467773	2.742492676	-0.084270047	0.49754033	-59.07330322	988.4984741	1126.04895	137.5504761	1061.155812	36.06333667	743870.2245	0.408378392	0.60211587	0.193737477	0.532264751	0.034329854	373.1175903	12.43	35.31	22.88	25.13	4.25	17617.26	1
7.760660648	74.51136017	66.75069952	34.97816113	17.93646514	24694.58176	-0.602148712	0.554287791	1.156436503	-0.044792385	0.213938039	-31.62342347	-0.945678711	1.227539063	2.173217773	-0.15221753	0.353920169	-107.4655762	1111.617798	1216.163208	104.5454102	1152.677958	25.383045	813790.6382	0.349232078	0.564875782	0.215643704	0.45638382	0.045849105	322.206977	9.57	33.59	24.02	19.10	6.14	13483.24	1
283.192627	335.2565002	52.06387329	311.609628	11.24146588	217815.13	-0.466699153	0.389059186	0.855758339	-0.087034076	0.161118876	-60.83681895	-1.196411133	0.702758789	1.899169922	-0.133312307	0.396082291	-93.18530273	1135.835938	1239.868042	104.0321045	1187.336937	28.37553705	829948.5192	0.421719164	0.647802234	0.22608307	0.508542255	0.04004578	355.4710364	15.03	28.78	13.75	20.87	3.81	14588.97	1
149.6931915	194.9638672	45.27067566	173.9112141	11.27439229	122955.2283	-0.716630518	0.43060717	1.147237688	-0.07857039	0.137932231	-55.54926606	-1.044433594	1.0546875	2.099121094	-0.08468002	0.37348718	-59.86877441	1105.569336	1219.839111	114.2697754	1159.50668	29.80563839	819771.2227	0.37476027	0.57640028	0.20164001	0.500635666	0.044840618	353.949416	12.73	31.52	18.79	21.25	5.01	15021.20	1
100.306282	164.0968933	63.79061127	119.2068253	12.16788819	83802.39821	-0.397093594	0.166363582	0.563457176	-0.057327481	0.088203372	-40.3012191	-0.707641602	0.99621582	1.703857422	0.13046295	0.3545016	91.7154541	1160.888184	1269.894775	109.0065918	1232.24086	30.0077057	866265.3243	0.451078773	0.873296082	0.422217309	0.630701971	0.112806454	443.3834853	0.66	29.96	29.30	20.00	8.57	14059.74	1
31.04006386	98.35071564	67.31065178	71.35747242	14.10486735	50449.733	-0.712360024	0.673262477	1.385622501	-0.098814836	0.207994634	-69.86208931	-1.384155273	1.344482422	2.728637695	-0.06571872	0.404095579	-46.46313477	1195.375366	1314.006104	118.6307373	1258.412074	30.97800062	889697.3362	0.436351538	0.641971529	0.205619991	0.530869936	0.036765534	375.3250444	7.19	28.00	20.81	21.63	4.18	15293.58	1
31.64078522	74.88938904	43.24860382	46.91457585	9.243610242	33168.60513	-0.654080153	0.421141833	1.075221986	-0.036327508	0.199271545	-25.68354843	-0.92175293	0.762939453	1.684692383	-0.100662944	0.311078233	-71.16870117	1089.331665	1207.818848	118.4871826	1141.37025	30.24325428	806948.7668	0.402191788	0.557353079	0.155161291	0.478464792	0.030396093	338.2746077	16.63	31.74	15.12	22.23	3.76	15716.00	1
272.401001	355.3890381	82.98803711	307.1275463	18.49939447	217139.1752	-0.647009015	0.416382343	1.063391358	-0.107637528	0.183396449	-76.09973216	-0.99206543	0.785522461	1.777587891	-0.120936975	0.28686659	-85.50244141	1106.524902	1190.994263	84.46936035	1147.672174	20.85011243	811404.2268	0.39809835	0.647840381	0.249742031	0.520088338	0.047794596	367.7024553	5.55	20.97	15.42	15.79	2.92	11164.73	1
0.015789835	359.7052002	359.6894104	298.5160078	71.11498312	209558.2375	-1.091815233	0.618476152	1.710291386	-0.101247804	0.242781063	-71.07595868	-1.634399414	1.004516602	2.638916016	-0.087687174	0.355260823	-61.55639648	1069.471191	1154.140259	84.66906738	1114.758345	20.85079149	782560.3579	0.36735484	0.632206559	0.264851719	0.533280728	0.047756274	374.3630712	7.81	22.77	14.95	15.20	2.85	10669.95	1
124.9121475	190.7674561	65.85530853	162.0160815	15.86303448	114545.3696	-0.407046199	0.659707069	1.066753268	-0.069856478	0.146022459	-49.38853029	-0.969604492	0.990112305	1.959716797	-0.130119701	0.262351721	-91.99462891	1103.013916	1191.580444	88.56652832	1144.101107	20.74175245	808879.4825	0.388799906	0.61663574	0.227835834	0.493511498	0.056715328	348.9126294	11.34	26.80	15.46	16.56	4.24	11707.99	1
109.1959686	216.7903595	107.5943909	167.0053525	32.27409508	118072.7842	-0.798649669	0.386639506	1.185289174	-0.163985739	0.219835401	-115.9379178	-1.009033203	0.691894531	1.700927734	-0.150830044	0.315669675	-106.6368408	1082.605347	1174.47644	91.87109375	1137.375403	20.9174486	804124.41	0.393583655	0.650863945	0.25728029	0.536759187	0.056114805	379.488745	11.32	26.27	14.95	17.70	3.30	12517.22	1
55.11142349	106.2683563	51.15693283	71.54235108	9.8585646	50508.89986	-0.499939144	0.582113087	1.082052231	-0.046115475	0.177250854	-32.55752525	-0.859863281	0.667724609	1.527587891	-0.147034037	0.276816697	-103.8060303	1076.143555	1177.125854	100.9822998	1120.349637	23.69973002	790966.844	0.384477228	0.553474367	0.168997139	0.468686891	0.041145757	330.8929447	10.87	31.39	20.52	18.18	3.89	12834.93	1
161.1240997	213.8214569	52.69735718	184.8127534	12.07558384	130108.1784	-0.49665916	0.357805312	0.854464471	-0.104648322	0.130072872	-73.67241838	-1.42175293	1.064331055	2.486083984	-0.084203373	0.419795215	-59.2791748	1149.890503	1272.740723	122.8502197	1212.931383	29.72907828	853903.6937	0.437346756	0.70360595	0.266259193	0.547857051	0.048042473	385.6913639	14.02	32.04	18.02	22.94	4.29	16150.86	1
90.26667023	198.3911896	108.1245193	136.4005529	23.14885945	96571.59146	-0.702232957	0.322704494	1.024937451	-0.177217477	0.199251245	-125.4699734	-1.331420898	0.589599609	1.921020508	-0.273193877	0.384156836	-193.4212646	1151.004761	1262.356079	111.3513184	1207.681091	25.53128794	855038.2122	0.421457738	0.635456622	0.213998884	0.520652891	0.04277122	368.6222467	12.71	31.97	19.26	20.98	4.36	14852.53	1
0.091633104	359.6553345	359.5637014	166.0153136	136.7919481	116044.7042	-0.920369565	0.414459467	1.334829032	-0.170713735	0.266456684	-119.3289007	-1.333496094	0.709350586	2.04284668	-0.264138501	0.389374444	-184.6328125	1083.607544	1150.737915	67.13037109	1119.268633	15.25639665	782368.7747	0.382830769	0.616034269	0.233203501	0.498100245	0.0468646	348.1720713	5.25	23.12	17.87	15.53	3.13	10857.99	1
271.5897522	340.8468323	69.25708008	300.867104	14.40350994	211208.707	-0.542896032	0.495316267	1.038212299	-0.06222647	0.193657705	-43.68298203	-0.903198242	0.655517578	1.55871582	-0.128509956	0.285843818	-90.21398926	1087.002075	1195.186157	108.184082	1137.776063	27.86466201	798718.796	0.410945654	0.578183055	0.167237401	0.478548668	0.035820489	335.9411649	15.02	30.82	15.80	21.38	3.88	15009.40	1
73.38524628	151.3890228	78.00377655	104.8916839	23.47660972	73633.96213	-0.18338652	0.575662434	0.759048954	0.15901778	0.158701621	111.6304812	-0.678588867	1.064941406	1.743530273	0.145202202	0.330060061	101.9319458	1021.191772	1129.838013	108.6462402	1065.438853	27.51285074	747938.0747	0.343195707	0.56730634	0.224110633	0.464676309	0.048872733	326.202769	12.81	28.82	16.01	20.50	4.17	14387.84	1
0.192486018	359.9866028	359.7941168	76.14204102	112.8922407	53832.423	-0.585619152	0.523751259	1.10937041	-0.085730712	0.25030724	-60.61161318	-1.054077148	0.895629883	1.949707031	-0.128596153	0.416057525	-90.91748047	1165.592896	1283.388794	117.7958984	1220.80454	27.1947011	863108.8096	0.40179202	0.664795101	0.263003081	0.504043406	0.051073087	356.3586884	8.61	29.49	20.88	21.49	5.61	15194.57	1
0.045436978	359.9819641	359.9365271	174.1144959	171.9735591	123273.0631	-0.392332345	0.398029178	0.790361524	-0.017252883	0.174546632	-12.21504095	-0.787597656	0.593017578	1.380615234	-0.092672402	0.268602748	-65.61206055	1145.875854	1269.734253	123.8583984	1203.514495	34.13042909	852088.2627	0.375317246	0.560224473	0.184907228	0.480681868	0.039275805	340.3227623	13.47	32.24	18.77	24.69	3.79	17478.83	1
0.080741748	359.795166	359.7144243	289.4222179	111.2495699	204910.9303	-0.703924417	0.655914307	1.359838724	-0.083883853	0.247729614	-59.3897682	-1.063598633	0.843017578	1.906616211	-0.093695861	0.351448559	-66.33666992	1182.554321	1304.335571	121.78125	1241.968422	31.32628735	879313.6429	0.442767948	0.595807135	0.153039187	0.509537074	0.030530424	360.7522484	14.55	29.46	14.92	23.59	3.30	16700.24	1
108.8035049	151.3161316	42.51262665	134.8723747	8.36312151	95354.76888	-0.388561249	0.2578969	0.646458149	-0.076106434	0.106339766	-53.80724885	-0.855834961	0.706542969	1.56237793	-0.031624153	0.228202968	-22.35827637	1166.345825	1285.74585	119.4000244	1231.848658	30.61477026	870917.0015	0.442129314	0.60741967	0.165290356	0.532851179	0.032067385	376.7257835	15.18	31.41	16.23	22.10	2.70	15626.02	1
197.397171	258.0915833	60.69441223	227.2132946	11.41622565	160185.3727	-0.568489134	0.673776269	1.242265403	-0.057164343	0.163563284	-40.30086168	-1.235961914	1.346191406	2.58215332	-0.083665434	0.348498136	-58.98413086	1226.208008	1316.921509	90.71350098	1276.545118	21.47706229	899964.3081	0.362556219	0.622885346	0.260329127	0.520973401	0.064224695	367.2862479	9.41	26.72	17.31	17.19	3.56	12122.44	1
0.006916462	359.9828491	359.9759327	296.8425905	107.0992825	208680.3411	-0.634215415	0.435016781	1.069232196	-0.058858151	0.201717794	-41.37728005	-0.982666016	0.705444336	1.688110352	-0.08443515	0.334015198	-59.35791016	1103.358765	1230.091431	126.732666	1165.961887	33.42460537	819671.2068	0.442814916	0.588394582	0.145579666	0.505103102	0.029562093	355.0874807	18.25	30.63	12.38	24.06	3.17	16912.42	1
207.2953339	302.5729675	95.27763367	262.573186	17.47356892	184851.5229	-0.762743711	0.529611886	1.292355597	-0.10385349	0.2000914	-73.11285666	-1.206665039	0.86706543	2.073730469	-0.16873325	0.368091473	-118.788208	1151.446899	1245.341675	93.89477539	1199.275856	22.80560484	844290.2026	0.408397198	0.600836158	0.19243896	0.510413972	0.041349661	359.3314363	10.08	29.14	19.06	18.42	4.58	12968.43	1
56.41764069	104.292038	47.87439728	73.3131539	10.21784411	51832.39981	-0.46753642	0.532902241	1.00043866	-0.064510562	0.158227435	-45.60896713	-0.796020508	0.807739258	1.603759766	-0.099400284	0.268023303	-70.27600098	1155.07373	1267.409424	112.3356934	1207.103734	27.81737422	853422.3397	0.427645296	0.676368475	0.248723179	0.510077443	0.059190455	360.6247523	13.58	27.61	14.03	20.44	3.66	14449.63	1
1.050675154	359.9990845	358.9484093	70.12963068	73.12089642	49581.64889	-1.002997279	0.289154559	1.292151839	-0.193234549	0.253015142	-136.6168265	-1.434204102	0.846435547	2.280639648	-0.105171776	0.458287024	-74.35644531	1201.775269	1301.107056	99.33178711	1259.240234	27.25931252	890282.8453	0.425760686	0.725652099	0.299891412	0.594458032	0.079393356	420.2818289	3.24	27.86	24.62	18.99	5.53	13423.59	1
74.29990387	110.8500366	36.55013275	99.1806395	7.317749277	69426.44765	-0.473716289	0.418540537	0.892256826	-0.027733125	0.142547586	-19.4131878	-0.68347168	0.552246094	1.235717773	-0.023846784	0.251777388	-16.69274902	1179.00647	1269.054199	90.04772949	1222.51676	24.67426431	855761.7321	0.447256565	0.60362947	0.156372905	0.515948429	0.040951803	361.1639003	11.10	22.88	11.78	17.67	3.11	12368.10	1
149.2328186	184.394577	35.16175842	162.3196052	6.705170881	114759.9609	-0.628921688	0.543533385	1.172455072	0.030388566	0.133925057	21.48471582	-0.720458984	1.143920898	1.864379883	-0.041168947	0.260043424	-29.10644531	1128.592163	1246.401489	117.8093262	1179.044169	30.14128788	833584.2275	0.347142398	0.631870806	0.284728408	0.469067338	0.049350464	331.630608	13.99	31.73	17.74	21.94	3.60	15513.81	1
8.222335815	45.31149292	37.0891571	26.86198267	8.039195053	18857.11183	-0.436092287	0.367924154	0.804016441	-0.008866432	0.140409033	-6.224235526	-0.983764648	0.689086914	1.672851563	-0.049490643	0.298525722	-34.74243164	1045.800781	1169.121704	123.3209229	1106.125194	31.19343769	776499.8864	0.397803813	0.587241232	0.189437419	0.4895943	0.032522712	343.6951984	18.82	31.62	12.80	23.64	3.19	16592.18	1
0.021252031	359.9767151	359.9554631	29.39763934	63.5708659	20695.9381	-0.370986253	0.634593546	1.005579799	0.031310336	0.169848928	22.04247648	-0.743164063	0.932617188	1.67578125	-0.013374329	0.306599278	-9.415527344	1070.610352	1200.262207	129.6518555	1130.222194	32.61513817	795676.4246	0.412110984	0.536064744	0.12395376	0.473262766	0.03049344	333.1769875	16.63	34.24	17.61	24.26	4.30	17078.03	1
0.097421728	359.9588013	359.8613795	277.4767894	143.3877837	195898.6133	-0.205551565	0.30858466	0.514136225	0.029467291	0.083171427	20.80390739	-0.693359375	0.963745117	1.657104492	-0.081037051	0.264272918	-57.2121582	1091.807861	1197.1521	105.3442383	1130.852862	26.31570827	798382.1205	0.325966716	0.572063506	0.24609679	0.433677533	0.052593153	306.1763383	7.40	29.86	22.46	19.13	6.56	13508.69	1
32.15899658	168.8843231	136.7253265	115.1963748	31.70748376	80867.85509	-1.10750556	0.262807459	1.370313019	-0.257431202	0.263802332	-180.7167039	-1.720703125	0.750610352	2.471313477	-0.300103082	0.424386358	-210.6723633	1165.713745	1283.336304	117.6225586	1226.256723	29.01722894	860832.2198	0.4002904	0.637441397	0.237150997	0.528761407	0.045704481	371.1905077	13.15	31.82	18.67	22.30	3.83	15653.09	1
97.31523132	143.2379303	45.92269897	125.0564901	12.30388147	87914.71251	-0.35932824	0.494844705	0.854172945	0.041979057	0.180117654	29.51127717	-0.698730469	0.796386719	1.495117188	0.038482362	0.269801706	27.05310059	1129.338989	1242.626099	113.2871094	1185.631214	30.56124394	833498.7435	0.3727732	0.571005523	0.198232323	0.487833467	0.039638107	342.946927	15.37	27.90	12.53	22.60	2.57	15885.19	1
195.0760803	252.5665283	57.490448	229.8636005	13.81755366	162513.5656	-0.62189436	0.30679214	0.9286865	-0.103374434	0.148635246	-73.08572519	-0.985595703	0.693237305	1.678833008	-0.08937826	0.266558077	-63.19042969	1198.677368	1317.017944	118.3405762	1262.060007	30.23293569	892276.4253	0.466459274	0.601986289	0.135527015	0.530633249	0.027066546	375.1577072	15.87	28.74	12.87	21.97	2.56	15529.91	1
109.9853668	156.2858887	46.30052185	136.1632139	7.763668143	95858.90259	-0.423935711	0.329825342	0.753761053	-0.001626981	0.133789346	-1.145394388	-0.716552734	0.678466797	1.395019531	0.044773795	0.246109795	31.52075195	1195.573853	1302.722168	107.1483154	1251.680258	29.43780437	881182.9016	0.438612908	0.617536545	0.178923637	0.524625803	0.041590629	369.3365653	11.31	27.20	15.89	20.98	3.43	14771.63	1
123.4477081	173.2060699	49.75836182	158.0829779	10.17368424	111448.4994	-0.501845837	0.21818243	0.720028266	-0.039776245	0.12486394	-28.04225247	-0.79675293	0.723022461	1.519775391	-0.00080324	0.261637473	-0.56628418	1232.946655	1315.721558	82.77490234	1279.409998	20.02952741	901984.0488	0.392578423	0.62791425	0.235335827	0.532423484	0.051517188	375.3585562	9.59	24.35	14.76	15.02	3.20	10587.14	1
141.8439178	194.749054	52.90513611	170.8657771	9.927240907	120802.1044	-0.260508865	0.251640767	0.512149632	-0.012177333	0.095671621	-8.609374532	-1.15625	0.71081543	1.86706543	-0.110627818	0.348517164	-78.21386719	1255.701416	1334.73584	79.03442383	1290.573948	17.88932221	912435.7809	0.3198466	0.592389762	0.272543162	0.481499902	0.077439517	340.420431	7.24	32.52	25.28	14.41	5.00	10185.11	1
0.173119083	358.3127441	358.1396251	17.75214466	43.10080318	12390.99697	-0.259883821	0.605680406	0.865564227	0.018379908	0.128309359	12.82917586	-0.674194336	0.955444336	1.629638672	0.026237947	0.311868417	18.31408691	1154.887085	1257.151733	102.2646484	1201.156687	26.9340501	838407.3673	0.384668857	0.594414592	0.209745735	0.50130562	0.046085397	349.9113229	12.90	27.68	14.78	19.66	4.05	13723.46	1
12.86097717	358.1696472	345.30867	139.2234991	81.69974663	98291.79039	-0.517968655	0.619800448	1.137769103	-0.005785257	0.131881973	-4.084391417	-0.73815918	1.170288086	1.908447266	0.205240828	0.361441615	144.9000244	1275.243042	1349.759033	74.51599121	1331.618123	19.21286514	940122.3948	0.411216557	0.800170422	0.388953865	0.662449208	0.090872532	467.6891409	0.08	30.74	30.66	13.70	9.56	9673.71	1
0.490434319	359.9838867	359.4934524	42.99555171	26.26068787	30397.85506	-0.874373734	0.424752146	1.29912588	-0.159988849	0.231336411	-113.1121163	-1.194824219	0.882324219	2.077148438	-0.214452503	0.374686818	-151.6179199	1176.466187	1311.548462	135.0822754	1242.634725	36.29771323	878542.7507	0.438312292	0.697992742	0.25968045	0.525362351	0.057384235	371.4311818	18.01	35.27	17.26	26.05	3.91	18418.12	1
107.5505829	195.7684174	88.21783447	155.5570342	25.85525199	109201.038	-0.689583004	0.312798262	1.002381265	-0.197584361	0.189821365	-138.7042215	-0.987182617	0.897827148	1.885009766	-0.176876057	0.307804553	-124.1669922	1169.102417	1297.626343	128.5239258	1240.626437	34.53441864	870919.7588	0.439170063	0.617399752	0.17822969	0.526196205	0.045852047	369.389736	16.72	33.41	16.70	25.06	4.05	17593.24	1
314.0349426	347.6016541	33.56671143	330.2034222	6.039773716	233784.0229	-0.621596992	0.465738207	1.087335199	0.022006427	0.174462178	15.58055059	-0.974853516	0.988891602	1.963745117	-0.050246244	0.371493066	-35.57434082	1119.591064	1271.060791	151.4697266	1187.518965	40.50042024	840763.4275	0.387865335	0.697505176	0.309639841	0.484821143	0.072054749	343.2533692	15.08	35.04	19.96	26.93	4.63	19064.99	1
0.412878543	359.5261841	359.1133055	310.408755	85.96806662	219458.9898	-0.690309227	0.499442875	1.189752102	-0.128760611	0.230230486	-91.03375173	-1.303955078	0.872192383	2.176147461	-0.213083313	0.364612313	-150.6499023	1141.55127	1232.943848	91.39257813	1187.450403	22.00816449	839527.4349	0.383292526	0.604555964	0.221263438	0.490851211	0.050920751	347.0318058	9.79	26.85	17.06	17.48	3.37	12360.44	1
0.757230639	359.7941284	359.0368978	316.0763687	72.03000474	220621.3053	-0.865071416	0.474454582	1.339525998	-0.047546957	0.209269567	-33.18777568	-1.08996582	1.340820313	2.430786133	0.009577448	0.362886983	6.685058594	1169.736206	1278.775024	109.0388184	1226.38605	30.2511996	856017.4631	0.416591048	0.771512866	0.354921818	0.556333285	0.085097628	388.3206328	9.57	32.86	23.29	21.77	4.47	15197.09	1
8.723731995	36.03377533	27.31004333	22.2209864	7.237222359	15665.79541	-0.319943279	0.424669236	0.744612515	0.069411599	0.111499183	48.93517745	-0.708251953	0.907958984	1.616210938	0.126272994	0.304373014	89.02246094	1139.970337	1283.178101	143.2077637	1213.913991	38.72259088	855809.3638	0.427974582	0.743638515	0.315663934	0.531273114	0.080311485	374.5475455	11.29	31.67	20.38	26.66	3.66	18794.15	1
87.36089325	147.7644653	60.40357208	122.0697328	14.12514905	86425.37085	-0.637907743	0.45256117	1.090468913	-0.103813501	0.18084289	-73.49995858	-0.903686523	0.609741211	1.513427734	-0.131477313	0.276519119	-93.0859375	1172.973267	1282.120483	109.1472168	1228.353549	30.19658779	869674.3126	0.408925951	0.611901164	0.202975214	0.512231536	0.042461572	362.6599273	16.35	34.09	17.75	22.44	3.24	15889.62	1
121.5685654	178.4679108	56.8993454	146.311012	12.60079692	103002.9524	-1.127906799	0.507768691	1.63567549	-0.094125586	0.254831787	-66.26441275	-1.257324219	0.868164063	2.125488281	-0.117585962	0.364149374	-82.78051758	1147.029907	1270.361206	123.3312988	1208.887624	30.13826991	851056.8876	0.458083123	0.601228297	0.143145174	0.516880047	0.028469622	363.883553	16.28	27.11	10.83	21.95	2.84	15451.99	1
119.4799805	182.4690094	62.98902893	141.8502479	11.26934338	100146.275	-0.818217993	0.469936997	1.288154989	-0.09152314	0.170627912	-64.61533658	-1.09375	0.663452148	1.757202148	-0.105440048	0.27858574	-74.44067383	1139.188232	1247.202271	108.0140381	1193.494559	27.70422431	842607.1586	0.461900353	0.603352487	0.141452134	0.521998485	0.03134381	368.5309303	13.23	26.68	13.45	20.51	2.40	14480.34	1
171.3722839	272.8432312	101.4709473	190.6679747	20.18626356	134039.5862	-1.236039758	0.413296908	1.649336666	-0.169973336	0.292657556	-119.4912554	-1.568237305	1.108276367	2.676513672	-0.213373523	0.457919364	-150.0015869	1162.246582	1272.271484	110.0249023	1218.319116	25.51351276	856478.3389	0.436732501	0.675076008	0.238343507	0.530681925	0.055229769	373.0693933	12.09	28.81	16.72	20.02	4.02	14072.98	1
160.6314087	288.8525391	128.2211304	224.7362279	27.30766487	159113.2493	-0.778794527	0.305592597	1.084387124	-0.216005973	0.219838183	-152.9322286	-1.293579102	0.736450195	2.030029297	-0.177880928	0.380122203	-125.9396973	1183.239136	1281.654907	98.41577148	1239.190638	24.87373288	877346.972	0.490710914	0.70920682	0.218495905	0.579196034	0.04312705	410.0707922	7.19	28.62	21.43	18.70	3.69	13236.22	1
111.7226257	271.6582336	159.9356079	159.1927251	33.97420479	112071.6785	-1.151237369	0.403449416	1.554686785	-0.131574551	0.271103823	-92.62848389	-1.397705078	1.168212891	2.565917969	-0.164102901	0.496617088	-115.5284424	1163.040771	1270.195679	107.1549072	1215.361077	25.91094597	855614.1981	0.385421038	0.713985145	0.328564107	0.519800913	0.068976579	365.9398426	3.60	31.51	27.90	19.27	5.77	13567.87	1
230.1295319	289.6806946	59.55116272	267.1104313	9.628785812	188847.0749	-0.526126206	0.452104867	0.978231072	-0.034452565	0.185396008	-24.35796371	-1.276611328	1.119506836	2.396118164	0.057552958	0.410949412	40.68994141	1225.05835	1333.17041	108.1120605	1282.641953	26.64928007	906827.8608	0.44629252	0.72972995	0.283437431	0.567897537	0.057320075	401.5035586	2.60	30.49	27.88	19.73	4.13	13945.94	1
220.066864	271.2938232	51.22695923	245.0805018	14.18847686	171801.4318	-0.597687364	0.700356305	1.298043668	-0.013496415	0.309282928	-9.460986986	-1.141479492	0.907470703	2.048950195	-0.069119833	0.402061944	-48.45300293	998.0209961	1134.541138	136.5201416	1068.759028	34.49381077	749200.0789	0.380755335	0.573300838	0.192545503	0.484180315	0.030843335	339.4104005	19.31	32.52	13.20	25.43	2.26	17828.57	1
126.5180664	199.6562347	73.13816833	151.3951601	9.490524194	105825.2169	-0.860377252	0.421257198	1.28163445	-0.113160727	0.204247722	-79.09934852	-0.986206055	0.840942383	1.827148438	-0.043326753	0.351213441	-30.28540039	1165.396484	1296.980835	131.5843506	1238.870218	32.75668942	865970.2826	0.490781158	0.629012227	0.138231069	0.561128449	0.02984033	392.2287857	13.55	32.60	19.06	23.33	3.23	16310.97	1
0.174364448	359.9682617	359.7938973	159.2642591	159.3328011	111962.7742	-0.840473711	0.295857906	1.136331618	-0.206802763	0.207918725	-145.3823423	-1.130249023	0.878662109	2.008911133	-0.128364661	0.421164914	-90.24035645	1200.999634	1329.213257	128.213623	1273.375459	32.57034177	895182.9479	0.49014622	0.800523639	0.310377419	0.590820287	0.063400459	415.3466618	12.17	30.76	18.60	24.33	3.51	17103.83	1
0.07924246	359.938324	359.8590815	282.8296716	131.8411993	199394.9185	-0.893688858	0.900267839	1.793956697	0.084028249	0.218243329	59.23991546	-1.387756348	1.159057617	2.546813965	-0.00571696	0.495095703	-4.030456543	987.6528931	1112.60144	124.9485474	1047.410815	34.99627513	738424.6247	0.280287832	0.582352936	0.302065104	0.446582707	0.073602545	314.8408085	1.24	31.05	29.81	23.35	5.35	16458.60	1
239.0309753	270.8851318	31.85415649	251.5386883	6.872602713	177837.8526	-0.428547502	0.427388668	0.85593617	-0.022738394	0.134480902	-16.07604487	-1.161621094	1.123291016	2.284912109	0.023333214	0.400194706	16.49658203	1212.203613	1328.714966	116.5113525	1269.806856	30.23853668	897753.4474	0.421007156	0.751345694	0.330338538	0.543579699	0.065873641	384.310847	11.92	30.06	18.14	21.93	3.81	15501.96	1
0.022345254	359.8729248	359.8505796	64.96520857	106.7487861	45865.43725	-0.426992536	0.225817755	0.65281029	-0.082594216	0.122884399	-58.31151678	-0.83996582	1.016845703	1.856811523	0.089423939	0.323920729	63.13330078	1182.814941	1291.956055	109.1411133	1254.437881	28.30073091	885633.1438	0.442793429	0.798214018	0.355420589	0.620874479	0.06942914	438.3373822	0.92	33.41	32.49	19.61	8.08	13844.59	1
73.82176971	125.2198486	51.39807892	99.25989228	11.74322503	70176.74384	-0.59839344	0.508913934	1.107307374	-0.042164446	0.223194397	-29.81026357	-1.065917969	1.036254883	2.102172852	0.022074698	0.386681474	15.60681152	1178.552368	1310.470093	131.9177246	1248.519483	31.78553259	882703.2743	0.43854773	0.600668669	0.162120938	0.532418251	0.035909172	376.4197034	13.74	31.64	17.90	23.22	4.09	16415.34	1
104.8259964	214.4020996	109.5761032	137.8961885	22.72668474	97630.50144	-0.883461654	0.171810374	1.055272028	-0.233384512	0.218643715	-165.2362342	-1.166870117	0.80871582	1.975585938	-0.267606229	0.437321206	-189.46521	1168.72229	1304.330444	135.6081543	1239.609275	32.37846463	877643.3665	0.434399992	0.606137574	0.171737581	0.53504602	0.033800329	378.8125825	15.07	31.91	16.84	23.99	4.33	16986.82	1
277.0934143	341.8560181	64.76260376	310.646709	12.40215795	219627.2233	-0.461430132	0.384017617	0.845447749	-0.076067646	0.160570909	-53.77982606	-0.956420898	0.845581055	1.802001953	-0.066505529	0.335908502	-47.01940918	1160.877808	1296.614502	135.7366943	1236.634164	34.92735909	874300.3542	0.463344514	0.617938519	0.154594004	0.531689341	0.031049744	375.9043644	13.94	32.39	18.45	25.71	4.37	18180.30	1
228.9143372	269.8598328	40.94549561	249.8566791	10.65344154	175899.1021	-0.544360638	0.607523918	1.151884556	0.055364933	0.218437151	38.97691265	-0.923950195	1.362182617	2.286132813	0.150584134	0.407079031	106.0112305	1169.15918	1321.136475	151.9772949	1248.344154	41.40836347	878834.2844	0.419636846	0.653544843	0.233907998	0.525192231	0.053916344	369.7353308	9.89	33.03	23.13	28.37	4.81	19975.81	1
0.082864299	359.7663879	359.6835236	145.3035745	144.5443603	102584.3236	-0.930302441	0.418471336	1.348773777	-0.21369834	0.278366449	-150.8710278	-1.338745117	1.189819336	2.528564453	-0.185152135	0.479016236	-130.7174072	1159.14624	1277.042358	117.8961182	1232.96684	29.46176766	870474.5887	0.440885842	0.66804862	0.227162778	0.560107212	0.054106694	395.435692	13.66	36.50	22.84	22.65	5.45	15987.73	1
202.135025	238.7798767	36.64485168	222.7188416	6.677392958	157462.221	-0.326527953	0.292753279	0.619281232	-0.014682466	0.122005161	-10.38050349	-0.917724609	0.783447266	1.701171875	0.006281182	0.297138184	4.440795898	1164.918945	1272.644409	107.7254639	1223.824373	28.59026906	865243.8317	0.429189682	0.605609179	0.176419497	0.517219504	0.032214652	365.6741897	9.53	27.22	17.69	20.29	4.04	14343.03	1
94.99608612	184.7207031	89.724617	138.5309371	24.05305175	97941.37251	-0.856731236	0.497189879	1.353921115	-0.184377429	0.219924121	-130.3548421	-1.244873047	0.906982422	2.151855469	-0.272665539	0.365283903	-192.7745361	1118.555298	1235.226318	116.6710205	1179.755631	29.4828371	834087.2312	0.441833705	0.591541111	0.149707407	0.505356519	0.032878372	357.2870587	14.51	32.29	17.78	23.50	3.86	16617.97	1
32.98151398	72.86852264	39.88700867	49.53655556	8.497367712	35071.88134	-0.723760009	0.543747306	1.267507315	-0.075189125	0.257783201	-53.23390072	-0.939208984	0.853149414	1.792358398	-0.197973909	0.356468914	-140.1655273	1094.738403	1236.970215	142.2318115	1159.482105	36.93509672	820913.3301	0.383313984	0.625240803	0.241926819	0.481169003	0.039425131	340.6676542	14.38	34.60	20.22	26.19	4.21	18543.77	1
63.72051239	172.7967834	109.0762711	86.30006621	19.46030105	60582.64648	-1.220433116	0.309449881	1.529882997	-0.205376516	0.280484352	-144.1743141	-1.735717773	0.873779297	2.60949707	-0.299371703	0.455953646	-210.1589355	1089.319336	1230.377197	141.0578613	1156.297631	37.4220956	811720.937	0.394504339	0.648693979	0.25418964	0.501889388	0.053530589	352.3263504	9.88	31.75	21.87	25.91	4.81	18191.42	1
114.5922012	260.2467041	145.6545029	208.3903124	36.42090413	147748.7315	-1.286127448	0.405700713	1.691828161	-0.256815613	0.302508571	-182.0822698	-1.649658203	0.764892578	2.414550781	-0.237221873	0.53798304	-168.1903076	1120.687988	1240.0625	119.3745117	1184.158731	28.91935727	839568.54	0.467550129	0.699522078	0.231971949	0.560203713	0.048584466	397.1844322	9.50	32.13	22.63	22.82	4.40	16182.84	1
155.2188416	259.3468933	104.1280518	197.9381561	26.9898325	139942.2763	-0.857692599	0.269520253	1.127212852	-0.250135707	0.187868293	-176.845945	-1.146362305	0.873535156	2.019897461	-0.241799189	0.358502088	-170.9520264	1098.623901	1225.52063	126.8967285	1165.531689	32.51013157	824030.9039	0.460983783	0.686390162	0.225406379	0.545191846	0.045054136	385.450635	16.49	29.04	12.54	23.99	2.92	16959.00	1
240.3749847	261.0762634	20.70127869	251.2392611	4.128544414	176872.4398	-0.302858949	0.315125704	0.617984653	-0.007185562	0.093953507	-5.05863573	-0.967773438	1.200683594	2.168457031	-0.014481111	0.429765775	-10.19470215	1101.309448	1235.542847	134.2333984	1168.743962	33.91372897	822795.7495	0.411377341	0.569488347	0.158111006	0.511142527	0.030517112	359.8443387	14.21	31.70	17.49	24.57	4.75	17295.06	1
184.2795258	274.149231	89.8697052	217.9991164	25.59890143	152817.3806	-1.037951946	0.333252698	1.371204644	-0.18408733	0.225357223	-129.0452186	-1.630126953	0.951293945	2.581420898	-0.168097612	0.373046914	-117.8364258	1085.427246	1191.740234	106.3129883	1147.446535	26.04121983	804360.021	0.466774434	0.637796164	0.17102173	0.542532657	0.039344788	380.3153924	9.44	28.43	18.99	19.93	4.34	13972.45	1
22.66835403	98.46967316	75.80131912	57.09332005	20.4371489	40364.97727	-0.920730054	0.40094322	1.321673274	-0.157071583	0.210790074	-111.0496094	-1.243286133	0.792236328	2.035522461	-0.17350646	0.387338863	-122.6690674	1100.80957	1210.359253	109.5496826	1165.957402	25.52855821	824331.8832	0.396095246	0.703409314	0.307314068	0.534263274	0.066082872	377.7241348	7.53	28.42	20.89	19.64	5.03	13887.81	1
71.06422424	132.87677	61.81254578	107.3848445	14.1734054	75491.54568	-0.280681312	0.288830578	0.56951189	0.042897207	0.095161488	30.15673633	-1.1328125	1.474365234	2.607177734	-0.05993062	0.418440276	-42.13122559	1026.143555	1123.886841	97.74328613	1067.582898	24.36077577	750510.7771	0.263222158	0.552274168	0.28905201	0.413731988	0.06271575	290.8535875	6.18	33.20	27.02	17.82	5.91	12526.04	1
90.58792877	127.4844589	36.89653015	114.684537	6.099547197	80623.22953	-0.394452244	0.452846974	0.847299218	-0.02900297	0.108127837	-20.38908776	-0.762573242	0.804443359	1.567016602	-0.112526255	0.26670403	-79.10595703	1077.348267	1192.101807	114.75354	1126.287193	30.68089021	791779.8967	0.381204367	0.559643626	0.17843926	0.471936957	0.040880248	331.7716805	10.88	30.53	19.66	21.69	5.35	15250.12	1
1.288907647	359.8997498	358.6108421	280.3413788	23.94439135	196799.6479	-0.730046868	0.132343292	0.862390161	-0.126928644	0.178998569	-89.10390843	-1.007202148	0.603027344	1.610229492	-0.170196968	0.311619402	-119.4782715	1088.116577	1203.567871	115.4512939	1145.08186	30.08279629	803847.4658	0.409578204	0.593274534	0.18369633	0.509718101	0.034502426	357.8221071	13.94	27.40	13.47	21.08	3.35	14799.42	1
37.83335114	81.75479126	43.92144012	53.34442031	6.332192856	37554.4719	-0.516009033	0.397294313	0.913303345	-0.040838237	0.162836358	-28.75011898	-1.434448242	0.890014648	2.324462891	-0.068317587	0.330026845	-48.09558105	1083.456787	1242.834717	159.3779297	1165.832057	41.2328531	820745.7678	0.303845495	0.595187068	0.291341573	0.491259957	0.060812601	345.8470097	17.29	38.15	20.86	28.44	3.27	20022.54	1
24.11579514	64.91508484	40.7992897	41.23750701	7.731052924	28989.96743	-0.613698781	0.605110586	1.218809366	0.060824877	0.205650705	42.75988844	-0.905273438	0.987060547	1.892333984	0.071327264	0.341962184	50.14306641	1129.752686	1275.061279	145.3085938	1198.126329	36.89652165	842282.8096	0.41783908	0.641184568	0.223345488	0.501319969	0.03882279	352.4279379	19.38	32.72	13.35	26.37	2.94	18540.55	1
0.085239582	359.8357544	359.7505148	253.7223061	131.9281567	179635.3927	-1.44357872	0.394236237	1.837814957	-0.111289912	0.273743787	-78.79325797	-2.094665527	0.910400391	3.005065918	-0.315247013	0.666024187	-223.1948853	982.2457886	1068.5802	86.33441162	1021.078624	25.58876241	722923.6658	0.338187277	0.77957207	0.441384792	0.510157194	0.124778362	361.191293	0.53	35.02	34.49	20.59	7.46	14576.19	1
0.046929222	359.9722595	359.9253303	150.3429752	160.9381081	106142.1405	-0.81609261	0.420450747	1.236543357	-0.149085336	0.200168255	-105.2542472	-1.649658203	1.049560547	2.69921875	-0.326992478	0.410030161	-230.8566895	1065.623413	1175.720215	110.0968018	1109.802495	33.26785599	783520.5612	0.230537936	0.598178267	0.367640331	0.436963043	0.107523113	308.4959082	2.17	39.12	36.96	23.16	9.99	16348.86	1
17.24785423	102.7515411	85.5036869	46.53264614	24.36212638	32712.45024	-0.735610425	0.316452593	1.052063018	-0.168372985	0.187983978	-118.3662084	-1.425415039	0.956420898	2.381835938	-0.286849433	0.434350681	-201.6551514	1074.067749	1192.039307	117.9715576	1126.919107	34.23113147	792224.132	0.257580996	0.615309358	0.357728362	0.465864552	0.110552764	327.5027804	2.22	35.19	32.97	23.88	7.76	16786.92	1
0.165158361	359.9285278	359.7633695	73.55139012	114.0611485	52074.3842	-0.920291543	0.468682885	1.388974428	-0.179745996	0.24901162	-127.2601652	-1.190185547	0.538696289	1.728881836	-0.210168698	0.351623417	-148.7994385	1088.435791	1198.074463	109.6386719	1146.890893	29.67778526	811998.7522	0.436868012	0.633108735	0.196240723	0.522929547	0.041975265	370.2341196	12.94	30.66	17.72	22.31	3.78	15794.97	1
214.0730591	286.930481	72.85742188	256.9783075	16.82773279	181169.7068	-0.483158946	0.370134801	0.853293747	-0.086807298	0.12010309	-61.19914529	-0.824829102	0.645385742	1.470214844	-0.14787892	0.279148622	-104.2546387	1136.966919	1238.762939	101.7960205	1185.78974	24.35752262	835981.767	0.399418324	0.599267662	0.199849337	0.502691172	0.040053883	354.397276	11.45	30.24	18.79	19.17	4.33	13516.94	1
246.1100769	301.6684875	55.55841064	279.3109954	12.96524651	195517.6968	-0.656833887	0.483025402	1.139859289	-0.079018682	0.161225696	-55.3130771	-0.869262695	1.029541016	1.898803711	-0.107502093	0.348567541	-75.25146484	1085.145142	1193.182129	108.0369873	1135.002901	27.50832122	794502.0309	0.391750574	0.64667356	0.254922986	0.498121113	0.05398353	348.6847793	10.14	31.41	21.26	20.74	5.05	14518.43	1
0.234997973	359.3998718	359.1648739	172.3131263	150.1312622	121480.7541	-1.035445571	0.310352117	1.345797688	-0.235393938	0.20796723	-165.952726	-1.411987305	0.583740234	1.995727539	-0.308899532	0.338683622	-217.7741699	1125.194092	1235.308838	110.1147461	1188.149896	25.77889867	837645.6769	0.449130595	0.638541698	0.189411104	0.54026924	0.044310486	380.8898142	13.84	32.51	18.67	22.10	3.67	15581.51	1
0.224276125	359.1379089	358.9136328	240.1434493	122.4343141	169781.4186	-1.328506112	0.446820408	1.77532652	-0.261752041	0.349992291	-185.0586929	-1.70324707	0.815429688	2.518676758	-0.374477359	0.528921773	-264.7554932	1125.772217	1231.655151	105.8829346	1186.981602	25.75213121	839195.9929	0.445549965	0.632747293	0.187197328	0.52827394	0.039806496	373.4896756	12.06	32.83	20.77	22.22	4.37	15707.64	1
93.98615265	201.3339233	107.3477707	122.3251639	21.84054175	86483.89085	-0.979980171	0.381700844	1.361681014	-0.181092864	0.267119251	-128.0326547	-1.193481445	0.992431641	2.185913086	-0.276358382	0.466097364	-195.385376	1141.922607	1279.438721	137.5161133	1208.114687	31.84236632	854137.0835	0.425252289	0.609638751	0.184386462	0.508343937	0.0433453	359.3991638	14.41	35.25	20.84	24.21	5.45	17114.36	1
0.243045539	359.7344971	359.4914515	111.1687012	133.7609837	77706.92216	-1.390979886	0.638030827	2.029010713	-0.202361495	0.369427742	-141.4506853	-1.589111328	1.16003418	2.749145508	-0.237835056	0.526450932	-166.2467041	1129.536987	1250.168213	120.6312256	1198.128446	29.54408754	837491.7839	0.424264163	0.63478297	0.210518807	0.530368519	0.043581715	370.7275951	14.38	33.18	18.80	23.39	4.38	16350.91	1
0.490780622	359.2007141	358.7099335	78.61710139	73.5793276	55660.90778	-1.347651124	0.293873996	1.64152512	-0.243623569	0.301281794	-172.4854867	-1.745239258	0.608520508	2.353759766	-0.249924137	0.482387732	-176.9462891	1106.205078	1236.345215	130.1401367	1177.626414	34.86366212	833759.5013	0.430728942	0.64484942	0.214120477	0.529654998	0.048435836	374.9957387	12.55	31.14	18.60	23.96	4.64	16964.01	1
238.3915405	267.4974976	29.10595703	256.8574122	4.757923257	181598.1905	-0.430818796	0.488393754	0.91921255	0.043448846	0.147576339	30.71833435	-0.920776367	1.09777832	2.018554688	0.066854647	0.376264833	47.26623535	1164.917114	1312.244629	147.3275146	1234.996609	37.17390031	873142.6027	0.425800204	0.772341549	0.346541345	0.516984578	0.069500154	365.508097	18.00	35.47	17.47	26.39	3.77	18657.03	1
252.6815186	359.7726135	107.091095	312.8431931	23.67723141	220241.608	-1.27619946	0.354159296	1.630358756	-0.241748936	0.267814871	-170.191251	-1.359863281	0.966430664	2.326293945	-0.285317681	0.442812589	-200.8636475	1171.871338	1297.675171	125.803833	1236.498438	29.85888393	870494.9005	0.443027735	0.667635798	0.224608064	0.541048568	0.041469895	380.8981922	15.30	34.09	18.79	23.32	3.97	16415.95	1
234.6872406	268.0151978	33.32795715	250.2956665	7.331860887	176959.0362	-0.482468516	0.424598545	0.90706706	-0.05023494	0.138037531	-35.51610223	-0.979858398	0.909545898	1.889404297	-0.077547972	0.366168924	-54.82641602	1161.706421	1298.157349	136.4509277	1227.859348	30.28174877	868096.5592	0.38575387	0.63945049	0.25369662	0.505896452	0.063624859	357.6687918	15.94	34.00	18.05	23.70	5.14	16753.53	1
257.658783	314.1017761	56.44299316	293.5387618	7.189215015	206944.8271	-0.245946497	0.399973154	0.645919651	0.059262345	0.099293413	41.7799534	-0.534912109	1.073486328	1.608398438	0.229685769	0.350218618	161.9284668	1192.347656	1325.683472	133.3358154	1271.055267	38.05971364	896093.963	0.459569991	0.838727295	0.379157305	0.591530799	0.110688482	417.0292134	2.91	35.26	32.34	25.08	8.02	17681.50	1
0.118542872	359.9927063	359.8741634	163.2178314	159.2997725	115231.789	-0.96419239	0.403712779	1.36790517	-0.144201286	0.196266572	-101.8061081	-1.444580078	0.800292969	2.244873047	-0.16261218	0.311094528	-114.8041992	1203.457031	1286.622192	83.16516113	1251.032001	19.06516608	883228.5929	0.386866897	0.692870438	0.306003541	0.522284154	0.075186924	368.7326129	9.74	25.81	16.06	15.85	3.71	11189.94	1
152.8492584	192.4259033	39.5766449	168.5165127	8.732503512	119141.1745	-0.595866024	0.547527611	1.143393636	-0.032858501	0.206740852	-23.23096015	-0.881835938	0.928466797	1.810302734	0.036529239	0.336674756	25.82617188	1144.440308	1284.758545	140.3182373	1222.503582	35.79918303	864310.0326	0.463397294	0.603442311	0.140045017	0.526881879	0.029971496	372.5054887	14.75	30.38	15.64	24.57	4.18	17370.54	1
0.512715936	359.3664856	358.8537697	146.6412919	38.05199642	103528.7521	-1.414527059	0.481256694	1.895783752	-0.122976565	0.236554161	-86.82145483	-1.60559082	0.707519531	2.313110352	-0.286550549	0.45930653	-202.3046875	1103.845947	1225.808594	121.9626465	1159.484922	33.69524969	818596.3552	0.367039949	0.552213371	0.185173422	0.473739356	0.05714203	334.4599857	3.68	28.97	25.29	23.27	5.58	16429.73	1
132.862381	149.7419891	16.87960815	141.0165006	3.49341537	99698.66591	-0.290191591	0.371761858	0.661953449	-0.003199965	0.108871602	-2.262375508	-0.643310547	0.817504883	1.46081543	-0.014067783	0.249684003	-9.945922852	1157.287964	1288.982788	131.6948242	1225.252544	32.9737305	866253.5487	0.425551206	0.573823571	0.148272365	0.502738283	0.031088822	355.4359661	19.26	29.35	10.09	23.77	2.06	16807.56	1
0.375390768	359.7905579	359.4151671	101.9048422	113.4994906	71333.38957	-1.14828074	0.354617566	1.502898306	-0.234356675	0.251521432	-164.0496726	-1.424316406	1.009765625	2.434082031	-0.281227504	0.365827087	-196.8592529	1199.498535	1306.187988	106.6894531	1258.896037	23.68793679	881227.2261	0.414978981	0.666286528	0.251307547	0.532216291	0.057045979	372.5514039	11.63	29.39	17.76	19.52	3.09	13662.37	1
0.305153787	359.8278809	359.5227271	80.52397991	104.9151796	56608.35788	-1.104034305	0.442607939	1.546642244	-0.188938212	0.212522283	-132.8235628	-1.471923828	0.938598633	2.410522461	-0.249283553	0.366794672	-175.2463379	1197.245361	1302.369385	105.1240234	1252.750613	23.20520021	880683.6808	0.379117399	0.686630785	0.307513386	0.535470016	0.069529259	376.4354215	10.89	30.58	19.68	19.40	5.16	13639.39	1
0.185853779	359.973053	359.7871992	248.4365244	127.2479528	175644.6227	-0.858341753	0.223234683	1.081576437	-0.223711312	0.202888443	-158.1638978	-1.208740234	0.582641602	1.791381836	-0.254759188	0.287194274	-180.1147461	1200.909668	1292.697021	91.78735352	1251.393131	22.38072057	884734.9437	0.415837914	0.624597073	0.208759159	0.523552923	0.039461656	370.1519169	13.05	26.64	13.59	18.19	2.03	12859.15	1
104.1233749	205.5173187	101.3939438	145.7165016	30.41642785	103167.2831	-1.039786935	0.744585752	1.784372687	-0.137023043	0.290687205	-97.01231478	-1.302734375	1.474609375	2.77734375	-0.131881455	0.422046902	-93.37207031	1173.354858	1279.433594	106.0787354	1233.539934	24.96859666	873346.2731	0.374349833	0.651737571	0.277387738	0.524559294	0.058184643	371.3879801	10.52	29.57	19.05	19.28	4.49	13648.87	1
153.7561951	191.4008484	37.64465332	175.8711894	5.728223546	123989.1885	-0.442072123	0.363508135	0.805580258	-0.001182737	0.141622154	-0.833829335	-1.145019531	0.83203125	1.977050781	-0.005740595	0.325805449	-4.047119141	1195.546387	1319.218628	123.6722412	1257.000606	29.08699172	886185.4271	0.395459354	0.615527332	0.220067978	0.510968135	0.052179316	360.2325355	15.73	31.33	15.60	22.49	3.71	15858.66	1
39.0936203	131.7688293	92.67520905	79.85486346	27.9324308	56457.38847	-0.720804036	0.386696279	1.107500315	-0.105702583	0.186654961	-74.7317261	-0.884887695	0.77355957	1.658447266	-0.162783438	0.307523333	-115.0878906	1190.602417	1272.444702	81.84228516	1233.880546	19.55688318	872353.5461	0.369573593	0.665356874	0.295783281	0.511758484	0.065696273	361.8132485	8.64	29.15	20.51	15.79	3.66	11165.99	1
0.147709414	359.980011	359.8323016	74.80092189	109.5289097	52959.0527	-1.170348406	0.733813405	1.904161811	-0.194628775	0.313634001	-137.7971727	-1.642578125	1.311523438	2.954101563	-0.169012555	0.413541161	-119.6608887	1151.405151	1260.039307	108.6341553	1215.296005	27.05809354	860429.5715	0.483986288	0.640073538	0.15608725	0.552787642	0.026076237	391.3736508	15.97	29.19	13.23	21.22	2.72	15023.78	1
219.1487122	316.3938599	97.24514771	282.3477296	20.30501995	198772.8016	-1.082669854	0.280629635	1.363299489	-0.186607443	0.209905049	-131.3716398	-1.489379883	0.871948242	2.361328125	-0.203305851	0.39986066	-143.1273193	1195.184082	1311.540161	116.3560791	1259.459907	27.13703897	886659.7744	0.440135986	0.673133194	0.232997209	0.542853722	0.053947319	382.1690205	13.87	31.08	17.22	21.17	3.87	14905.86	1
0.411200672	359.3288574	358.9176567	299.5094277	40.29114076	210255.6182	-0.989289343	0.495479107	1.48476845	-0.135270027	0.263717834	-94.9595591	-1.296386719	1.264770508	2.561157227	0.010242951	0.417905855	7.190551758	1200.898926	1316.407593	115.508667	1271.749076	28.51352221	892767.8513	0.470987082	0.776727498	0.305740416	0.611867124	0.066711001	429.5307207	3.68	32.77	29.09	20.32	5.82	14264.72	1
120.1544952	317.6781616	197.5236664	209.8723989	22.80838203	147750.1688	-0.566574991	0.436680079	1.003255069	0.019857346	0.142478717	13.97957181	-0.90020752	0.692382813	1.592590332	-0.085079973	0.315397577	-59.89630127	997.6295166	1083.594482	85.96496582	1032.159073	22.47199456	726639.9876	0.290375501	0.570838392	0.280462891	0.421875208	0.05639908	297.0001464	0.32	25.48	25.16	16.44	5.32	11575.59	1
31.3008728	344.9310913	313.6302185	146.0215486	22.27543414	102799.1702	-1.251947403	0.507972002	1.759919405	-0.013894633	0.154600634	-9.781821886	-1.450256348	0.982849121	2.433105469	-0.101995642	0.454048949	-71.80493164	981.3220825	1075.334229	94.012146	1027.314265	26.64924927	723229.2427	0.318777412	0.596671045	0.277893633	0.464473643	0.072731946	326.9894446	0.58	28.09	27.51	19.24	5.06	13546.96	1
159.346817	228.3957977	69.04898071	190.2594005	17.86536251	134513.3961	-0.357337773	0.702339947	1.05967772	0.081867214	0.1906651	57.88012005	-0.807312012	1.09765625	1.904968262	0.063114927	0.347907805	44.62225342	977.9282227	1065.950317	88.02209473	1019.302885	22.71905636	720647.1396	0.293647975	0.573077321	0.279429346	0.462274595	0.061874696	326.8281386	8.09	24.84	16.75	18.00	2.98	12727.85	1
207.9340668	271.3741455	63.44007874	223.2863606	13.6014104	157640.1706	-0.278353304	0.681430876	0.95978418	0.067390773	0.190269407	47.57788609	-0.528320313	1.057861328	1.586181641	0.175463279	0.345138138	123.8770752	1176.093384	1303.174072	127.0806885	1250.543022	30.19028238	882883.3735	0.392121315	0.610602736	0.218481421	0.538349443	0.051546105	380.0747066	11.74	32.73	20.99	21.96	6.31	15501.12	1
175.6783905	236.8181152	61.13972473	202.1974915	13.40970029	143155.824	-0.502724051	0.280978888	0.78370294	-0.128350875	0.136922972	-90.87241934	-0.794067383	0.714111328	1.508178711	-0.117552332	0.292898395	-83.22705078	1169.678101	1289.83728	120.1591797	1236.319021	30.77373676	875313.8666	0.443237126	0.618256927	0.175019801	0.528809424	0.03938732	374.3970722	13.77	27.57	13.81	22.04	3.70	15604.62	1
215.394165	283.8713074	68.47714233	246.590978	17.25373159	173353.4576	-0.72128123	0.747710645	1.468991876	0.016305016	0.245541585	11.46242622	-1.165893555	0.792480469	1.958374023	0.030421467	0.354354956	21.3862915	973.9437866	1058.477905	84.53411865	1017.627615	20.99230203	715392.2133	0.43203032	0.592312872	0.160282552	0.517497764	0.032897556	363.8009279	12.63	28.17	15.55	17.46	3.27	12273.94	1
31.51338387	61.63394547	30.1205616	48.72791183	7.785333858	34304.44993	-0.337011039	0.425420135	0.762431175	0.024322112	0.127279294	17.12276717	-1.051574707	0.963012695	2.014587402	0.05484555	0.375519344	38.61126709	941.2539673	1059.059082	117.8051147	1008.742257	31.21115593	710154.5486	0.26840654	0.62277329	0.35436675	0.509860299	0.077850046	358.9416507	12.22	33.10	20.88	22.76	5.90	16024.16	1
276.0068359	332.7608948	56.75405884	294.9184253	11.32384747	208802.2451	-0.655626118	0.694785595	1.350411713	-0.006012662	0.205186155	-4.256964798	-1.436340332	1.139831543	2.576171875	-0.021782654	0.384145229	-15.42211914	963.3684082	1073.164551	109.7961426	1020.914186	28.39163257	722807.2435	0.367190123	0.606571794	0.239381671	0.495392453	0.057193477	350.7378565	13.24	32.34	19.09	21.47	3.91	15204.04	1
33.84877014	84.31826019	50.46949005	55.44545183	11.66719342	39255.37989	-0.557726622	0.352742493	0.910469115	-0.104766393	0.162232764	-74.17460597	-1.183959961	1.049804688	2.233764648	-0.081286931	0.336706585	-57.55114746	1171.994995	1319.6604	147.6654053	1251.71391	36.55301425	886213.4482	0.439382821	0.669048727	0.229665905	0.538899663	0.047103558	381.5409615	19.78	33.92	14.13	26.00	3.23	18408.71	1
97.21025848	158.9059906	61.69573212	123.5560996	12.24529315	87354.16243	-0.50512588	0.674597144	1.179723024	-0.003591414	0.184214316	-2.53912945	-1.29901123	1.069641113	2.368652344	-0.045565982	0.370588818	-32.21514893	962.305603	1066.770142	104.4645386	1009.763304	26.85233717	713902.6561	0.326382995	0.571042299	0.244659305	0.472844904	0.054309704	334.3013475	14.16	31.17	17.01	20.70	3.52	14637.81	1
0.265907407	359.6245117	359.3586043	304.8374916	69.41792324	215520.1066	-0.846398294	0.390598714	1.236997008	-0.163814398	0.213634498	-115.816779	-0.937133789	0.674560547	1.611694336	-0.191151922	0.275904363	-135.1444092	1138.038818	1275.207397	137.1685791	1207.61731	35.00470964	853785.438	0.427562535	0.586487055	0.15892452	0.508922286	0.023764131	359.8080561	19.56	30.96	11.40	25.24	2.35	17842.39	1
234.709549	268.5924377	33.88288879	253.2402049	7.295918608	178534.3445	-0.389422923	0.443198621	0.832621545	0.038923586	0.142119573	27.44112813	-1.434387207	1.592956543	3.02734375	0.050249768	0.472958645	35.42608643	955.3347168	1071.329102	115.9943848	1020.797861	30.00804512	719662.4922	0.274738848	0.647060037	0.372321188	0.509413212	0.075301623	359.1363142	11.91	35.34	23.43	22.34	6.13	15751.62	1
225.3529358	306.3442993	80.99136353	270.6401194	19.06613329	189718.7237	-0.644809902	0.924409032	1.569218934	0.058476814	0.252232191	40.99224677	-0.847290039	1.45489502	2.302185059	0.178290047	0.34725786	124.9813232	967.6231079	1069.000732	101.3776245	1024.852173	23.40102977	718421.3733	0.401882112	0.609121263	0.207239151	0.534420819	0.038408714	374.6289944	12.36	34.36	22.01	18.82	5.03	13195.84	1
199.7980194	265.434906	65.6368866	246.5925602	11.18697935	174094.3475	-0.699051261	0.274282515	0.973333776	-0.093486232	0.169919186	-66.0012795	-0.795654297	0.791503906	1.587158203	-0.049721175	0.244968906	-35.10314941	1230.943481	1336.69458	105.7510986	1288.947754	26.65771763	909997.1143	0.4275949	0.605672538	0.178077638	0.531527507	0.039545699	375.2584201	14.47	25.99	11.53	19.41	2.90	13705.10	1
100.0698013	285.3312683	185.261467	266.8499008	17.02352781	188396.03	-0.367099762	0.292223215	0.659322977	0.016475288	0.110472034	11.63155309	-0.454956055	0.900024414	1.354980469	0.218490644	0.259500176	154.2543945	1252.150269	1352.179077	100.0288086	1316.733586	26.44705107	929613.9117	0.514118433	0.830406368	0.316287935	0.629269454	0.084168067	444.2642348	0.09	32.29	32.20	18.67	7.39	13181.68	1
273.0377502	307.9950256	34.95727539	288.9297213	7.875428185	203117.5941	-0.367257804	0.600869834	0.968127638	0.060448704	0.145660716	42.4954387	-0.851074219	0.725463867	1.576538086	0.111474332	0.316541627	78.36645508	1169.266724	1324.805664	155.5389404	1251.109244	40.52562526	879529.7982	0.430149436	0.672607005	0.242457569	0.530111076	0.049528484	372.6680867	19.88	35.70	15.81	28.82	4.13	20257.91	1
0.000897232	359.538147	359.5372497	265.0267609	118.464945	187638.9467	-1.391306043	0.479334474	1.870640516	-0.184680438	0.317056765	-130.7537502	-1.722412109	0.959838867	2.682250977	-0.19633596	0.435186605	-139.0058594	1187.616821	1323.8927	136.2758789	1258.18061	32.79495509	890791.8716	0.443472385	0.644443274	0.200970888	0.547251962	0.043946983	387.4543893	16.02	30.32	14.29	24.16	2.85	17104.64	1
46.52220154	109.5709763	63.04877472	85.58016995	8.062737857	60505.18015	-0.441049993	0.445265859	0.886315852	0.026072024	0.192033866	18.43292107	-0.727050781	1.273803711	2.000854492	0.194314528	0.360753541	137.3803711	1175.338135	1322.345459	147.0073242	1262.222978	41.01829771	892391.6458	0.431114852	0.748242319	0.317127466	0.579259281	0.088287959	409.5363119	4.44	36.11	31.67	27.01	7.07	19098.69	1
23.03031349	98.96917725	75.93886375	55.16765963	19.87260754	38727.69706	-0.907616973	0.449753106	1.357370079	-0.120045097	0.22110524	-84.27165783	-1.174194336	0.864501953	2.038696289	-0.157090755	0.405548726	-110.27771	1223.150269	1354.134888	130.9846191	1284.872585	30.96498192	901980.5544	0.410421073	0.697197199	0.286776125	0.518775919	0.060992147	364.1806952	15.76	34.79	19.03	24.32	4.82	17070.77	1
235.7622375	300.2843933	64.52215576	257.352864	12.85578028	180404.3577	-1.002338052	0.483349055	1.485687107	-0.138134324	0.207528563	-96.83216078	-1.202758789	0.577880859	1.780639648	-0.080501279	0.30103894	-56.43139648	1158.043945	1280.695068	122.651123	1229.651196	31.11806202	861985.4882	0.427295506	0.620898187	0.193602681	0.543469808	0.038585382	380.9723353	14.53	29.82	15.29	22.28	3.68	15618.81	1
135.539566	218.1375885	82.59802246	156.6731852	11.27694183	110767.9419	-1.169195294	0.399740845	1.568936139	-0.098512239	0.265281271	-69.64815285	-1.371582031	0.734130859	2.105712891	0.012704118	0.402739155	8.981811523	1204.686646	1317.827881	113.1412354	1274.032082	29.70468951	900740.6819	0.455838084	0.689266562	0.233428478	0.569751253	0.043794608	402.814136	1.94	29.57	27.63	20.58	5.60	14548.52	1
234.2646484	279.4939575	45.22930908	258.0497001	9.273443083	180892.8398	-0.480113477	0.46010071	0.940214187	0.063275753	0.123555828	44.35630251	-1.457397461	0.803100586	2.260498047	0.080507374	0.308762823	56.43566895	1140.818848	1269.934326	129.1154785	1209.141062	32.80090356	847607.8844	0.386313021	0.619228959	0.232915938	0.501537282	0.041509906	351.5776345	15.12	32.12	17.00	23.81	3.01	16694.24	1
133.3947144	297.5501099	164.1553955	266.3285599	19.09139398	188027.9633	-1.314486504	0.494142354	1.808628857	-0.049385259	0.236213323	-34.86599266	-1.618896484	1.228027344	2.846923828	-0.062288365	0.487479862	-43.97558594	1177.379028	1294.601196	117.222168	1236.300473	31.80158157	872828.1339	0.371265233	0.674905062	0.303639829	0.529341707	0.077413261	373.7152448	3.02	28.70	25.67	21.65	5.13	15281.56	1
216.9562683	339.246521	122.2902527	316.6707791	14.588418	223569.57	-0.406062841	0.530459344	0.936522186	-0.041194932	0.147147736	-29.08362205	-0.678466797	1.154907227	1.833374023	0.155593137	0.333079192	109.8487549	1236.205322	1357.042236	120.8369141	1316.065994	32.49670515	929142.592	0.443248004	0.715923607	0.272675604	0.603016264	0.063185439	425.7294821	2.65	33.52	30.87	21.91	9.01	15465.80	1
8.350728035	353.8840332	345.5333052	172.7337797	38.82362733	121431.8471	-0.690961182	0.495588452	1.186549634	-0.022886697	0.220319119	-16.08934818	-0.852661133	0.956420898	1.809082031	0.060868807	0.370754056	42.79077148	1291.924683	1367.044067	75.11938477	1337.395782	20.04938899	940189.2346	0.365320295	0.711097062	0.345776767	0.564244446	0.070664079	396.6638457	0.24	20.60	20.37	13.91	4.36	9777.83	1
0.036895301	359.6230469	359.5861516	211.1934584	155.7338328	148891.3882	-1.075538993	0.40160206	1.477141052	-0.219117463	0.228691322	-154.4778118	-1.409912109	0.833862305	2.243774414	-0.273028867	0.316667002	-192.4853516	1117.447144	1248.738647	131.2915039	1186.418567	32.63552851	836425.0896	0.44277963	0.58683759	0.144057959	0.520583291	0.028427203	367.0112201	18.23	31.22	12.99	25.09	2.81	17688.49	1
0.014770281	359.9578552	359.9430849	125.9295015	161.928398	89535.87557	-0.822339237	0.638184309	1.460523546	-0.08812093	0.272135693	-62.65398158	-1.016845703	0.79309082	1.809936523	-0.086943593	0.361612158	-61.81689453	1166.937744	1301.671265	134.7335205	1236.254233	36.53606791	878976.7595	0.343748063	0.724836648	0.381088585	0.526313924	0.076435211	374.2092	19.21	32.46	13.25	26.23	2.57	18649.91	1
175.1304016	211.3658447	36.23544312	193.8045749	6.864813293	135857.007	-0.388803959	0.439701051	0.828505009	0.017901824	0.127371999	12.5491784	-0.685913086	0.880493164	1.56640625	0.086900132	0.311739196	60.91699219	1166.234375	1275.256714	109.0223389	1224.187093	29.13263284	858155.1519	0.440896571	0.617120743	0.176224172	0.528327747	0.039341511	370.3577509	10.54	27.27	16.73	20.35	4.00	14263.74	1
113.9911423	207.2105103	93.21936798	155.5333272	25.9685816	109339.929	-0.59403795	0.263177484	0.857215434	-0.118100561	0.142922686	-83.02469428	-0.998901367	0.984863281	1.983764648	-0.101183787	0.293134158	-71.13220215	1232.531372	1316.25415	83.72277832	1276.415754	20.14419975	897320.2753	0.43730092	0.70417577	0.26687485	0.545032343	0.047081244	383.1577368	9.44	22.47	13.03	16.15	2.80	11352.36	1
54.58900833	114.5438385	59.95483017	91.7609917	16.83471301	64783.26014	-0.495674253	0.434693933	0.930368185	-0.079529213	0.1532805	-56.14762452	-1.091186523	0.708496094	1.799682617	-0.043274099	0.340957185	-30.55151367	1215.538208	1314.972656	99.43444824	1269.390154	23.45376908	896189.449	0.380662113	0.665896893	0.285234779	0.544369683	0.064346431	384.3249959	7.12	27.20	20.08	17.78	4.57	12554.26	1
150.1324921	186.0441895	35.91169739	162.8739989	6.747218151	113848.9252	-0.615527511	0.447531253	1.063058764	-7.42318E-05	0.15988811	-0.051888044	-1.812316895	0.983032227	2.795349121	-0.007208872	0.442340537	-5.039001465	1003.573425	1121.829834	118.2564087	1065.426293	29.5748016	744732.9786	0.363555014	0.65878278	0.295227766	0.504274345	0.070333005	352.4877672	12.73	32.52	19.78	21.83	4.92	15256.97	1
46.71619797	233.9108582	187.1946602	203.0544389	16.77944762	142950.325	-1.676063061	0.537786782	2.213849843	-0.04592718	0.237308455	-32.33273452	-1.825134277	1.295532227	3.120666504	-0.050960367	0.615726682	-35.87609863	985.1469116	1090.856445	105.7095337	1042.145567	28.45818691	733670.4791	0.379350692	0.734835446	0.355484754	0.539397237	0.074791556	379.7356548	1.15	31.83	30.68	20.98	6.01	14772.68	1
23.31456375	76.80344391	53.48888016	46.61749271	14.90859263	33005.18484	-0.270293444	0.480872601	0.751166046	0.06605089	0.141360118	46.76403008	-1.140014648	0.854980469	1.994995117	-0.018021751	0.384597173	-12.75939941	1060.360962	1163.757202	103.3962402	1109.131212	27.18071257	785264.8978	0.270407766	0.575218558	0.304810792	0.46029769	0.072140568	325.8907644	10.04	27.80	17.76	20.59	4.41	14576.28	1
0.048037138	359.9721985	359.9241613	112.674669	148.7550929	79435.64166	-0.675670743	0.763868034	1.439538777	-0.048073288	0.234482822	-33.89166775	-1.016235352	0.920288086	1.936523438	-0.058792352	0.310975054	-41.4486084	1088.014282	1189.071411	101.0571289	1138.867164	25.24585179	802901.3507	0.406451672	0.590811312	0.18435964	0.506565684	0.03465282	357.1288073	13.85	27.51	13.66	20.40	2.91	14383.67	1
6.311084747	60.77225113	54.46116638	29.77469751	11.19032362	20961.38705	-0.371415854	0.467635781	0.839051634	0.048499914	0.16448761	34.14393975	-1.062316895	0.934692383	1.997009277	0.019336267	0.380182101	13.61273193	1002.312317	1122.628784	120.3164673	1064.02796	30.28885579	749075.6836	0.240787357	0.569985151	0.329197794	0.473723206	0.071479	333.5011372	12.62	32.77	20.15	22.42	4.57	15780.53	1
0.292753696	359.9005737	359.60782	115.5666963	135.0222648	81705.65426	-0.963205755	0.156759366	1.119965121	-0.225924888	0.154725736	-159.7288958	-1.399536133	0.452514648	1.852050781	-0.304877426	0.241581529	-215.5483398	1115.814087	1212.711914	96.89782715	1164.864299	22.1599202	823559.0591	0.42324087	0.634461761	0.21122089	0.515910776	0.050724069	364.7489187	11.76	27.96	16.20	18.58	3.77	13133.50	1
83.23716736	170.4422455	87.20507813	114.1735908	29.41875568	80720.72866	-0.894970536	0.383222401	1.278192937	-0.149530064	0.23870319	-105.7177552	-1.282226563	0.852783203	2.135009766	-0.284169846	0.354443576	-200.9080811	1093.343506	1197.429565	104.0860596	1143.354902	23.23029338	808351.9159	0.374216944	0.63408637	0.259869426	0.493979209	0.067295978	349.2433005	13.66	34.66	21.00	19.82	4.64	14011.79	1
124.5544968	158.4596863	33.90518951	141.5582844	7.538001065	100081.7071	-0.486980528	0.389891803	0.876872331	-0.063218025	0.138145343	-44.69514375	-1.036621094	0.688720703	1.725341797	-0.155033095	0.223852558	-109.6083984	1096.383667	1216.557861	120.1741943	1150.356335	29.39946074	813301.9288	0.403430849	0.619491994	0.216061145	0.484244521	0.044449184	342.3608763	15.31	31.82	16.51	21.71	4.23	15347.57	1
0.073291503	359.8782654	359.8049739	319.9192036	73.17838405	224903.2002	-0.547843218	0.539315104	1.087158322	0.029774527	0.195704896	20.93149226	-0.941772461	0.983764648	1.925537109	-0.017296825	0.300002604	-12.15966797	974.8374634	1077.776489	102.9390259	1022.108897	27.49746452	718542.5549	0.417127818	0.54133743	0.124209613	0.472404259	0.023839941	332.1001944	12.58	29.51	16.92	20.56	3.38	14455.04	1
276.0535583	313.9588928	37.90533447	294.0947888	9.767696294	207630.9209	-0.542565167	0.449028254	0.991593421	0.02889139	0.14096312	20.39732102	-1.299377441	0.676757813	1.976135254	-0.138096969	0.384827606	-97.49645996	968.520813	1081.210938	112.6901245	1018.668842	29.3079824	719180.2026	0.31941393	0.543789506	0.224375576	0.440008139	0.051534781	310.6457464	4.94	33.79	28.85	21.87	5.15	15440.75	1
214.5126648	268.6531067	54.14044189	240.1622964	11.36148905	169794.7435	-0.637075245	0.426168621	1.063243866	0.006594744	0.159237856	4.662483834	-1.045166016	0.836547852	1.881713867	-0.042606338	0.308386516	-30.12268066	1009.047302	1095.06897	86.02166748	1050.278741	22.68374998	742547.0696	0.330575824	0.598688841	0.268113017	0.484069956	0.05010628	342.2374592	5.02	24.69	19.67	17.37	2.65	12281.49	1
22.12353134	67.42584229	45.30231094	50.63431604	11.47381455	35798.46144	-0.638113678	0.390855789	1.028969467	-0.08545244	0.163543438	-60.4148751	-1.030151367	0.698364258	1.728515625	-0.187675767	0.270363186	-132.6867676	1128.648315	1252.826172	124.1778564	1186.80427	34.91565807	839070.6187	0.255088955	0.702733278	0.447644323	0.479055265	0.100845806	338.6920722	8.26	32.41	24.15	24.85	4.64	17566.43	1
7.552258015	62.26124573	54.70898771	41.58113861	13.25476415	29273.12158	-0.677612245	0.313858271	0.991470516	-0.100301014	0.171521157	-70.61191385	-1.180541992	0.573608398	1.754150391	-0.160348372	0.336813069	-112.8852539	1227.314453	1351.333252	124.0187988	1287.200207	31.29318458	906188.9456	0.421502501	0.656407475	0.234904975	0.511043953	0.04187844	359.7749429	14.96	32.07	17.11	23.00	3.79	16193.86	1
237.4034119	317.2275391	79.8241272	278.500544	23.3533161	196621.3841	-0.701077163	0.444032669	1.145109832	-0.133661439	0.191061948	-94.36497572	-1.117431641	0.521240234	1.638671875	-0.154086018	0.28963497	-108.784729	1021.903259	1126.620117	104.7168579	1075.018494	27.21440157	758963.0571	0.446151584	0.636933327	0.190781742	0.518251577	0.039028255	365.8856133	11.14	26.96	15.82	21.19	3.46	14959.64	1
79.23201752	166.5114594	87.27944183	109.4001727	18.6411873	77127.12178	-0.796600819	0.745860815	1.542461634	-0.106026119	0.264513445	-74.74841408	-1.248535156	1.118896484	2.367431641	-0.140581713	0.368889733	-99.11010742	1047.558594	1149.61438	102.0557861	1101.451739	27.44730305	776523.4763	0.270699382	0.598736823	0.328037441	0.482840024	0.079115593	340.4022169	10.89	26.14	15.25	19.97	3.45	14079.92	1
116.7773743	249.937439	133.1600647	159.7716554	40.27169323	112958.5604	-0.991191387	0.69862318	1.689814568	-0.148777678	0.330828588	-105.1858181	-1.357421875	1.027099609	2.384521484	-0.235179248	0.464219304	-166.2717285	993.8899536	1095.565918	101.6759644	1046.109647	22.64779053	739599.5203	0.400921375	0.6234411	0.222519726	0.521266996	0.050697205	368.5357659	9.45	26.93	17.48	18.93	3.47	13382.46	1
0.302236855	359.5488281	359.2465913	275.558706	75.59099221	194268.8877	-0.621348679	0.268452257	0.889800936	-0.148203452	0.162080881	-104.4834338	-0.950683594	0.676635742	1.627319336	-0.20228436	0.300573521	-142.6104736	1037.687012	1135.684204	97.99719238	1084.323448	24.11781177	764448.0311	0.417649418	0.643882751	0.226233333	0.526613368	0.048716091	371.2624244	10.73	26.92	16.19	18.66	3.98	13154.33	1
3.032207966	352.5900879	349.5578799	79.19942488	24.39321068	55993.99339	-0.664259017	0.30031231	0.964571327	-0.05887973	0.149485468	-41.6279688	-2.89453125	2.196777344	5.091308594	0.161827249	0.712002459	114.4118652	1143.969238	1283.888184	139.9189453	1239.75215	39.62249127	876504.7698	0.236447394	0.836139023	0.599691629	0.635118055	0.156314593	449.0284649	0.33	45.58	45.25	24.75	12.75	17495.16	1
3.829377651	71.92842102	68.09904337	30.07460076	16.84370573	21322.89194	-0.692893326	0.324386448	1.017279774	-0.169817936	0.168127623	-120.4009167	-1.963500977	1.616577148	3.580078125	-0.032758231	0.599865945	-23.22558594	1146.633423	1280.328247	133.6948242	1228.068051	38.08909206	870700.2482	0.263567507	0.826811016	0.563243508	0.58293921	0.123499886	413.3038997	4.75	42.91	38.16	25.43	7.86	18030.08	1
238.062088	270.7008667	32.63877869	254.0762264	6.935607205	179631.892	-0.500976324	0.231022909	0.731999233	-0.086067036	0.117050155	-60.8493947	-1.558105469	1.128173828	2.686279297	-0.002730956	0.506211793	-1.930786133	1121.498779	1274.672974	153.1741943	1209.72022	40.84377586	855272.1958	0.252194375	0.739572644	0.487378269	0.557140873	0.111164628	393.8985974	13.07	42.52	29.44	27.21	7.19	19235.94	1
87.95547485	129.4112701	41.45579529	111.2381708	7.601132255	78089.19593	-0.541730165	0.304761916	0.846492082	-0.055139187	0.123593048	-38.70770918	-0.848876953	0.649902344	1.498779297	-0.106571034	0.277602362	-74.81286621	1176.720825	1306.409912	129.6890869	1236.009932	31.81863307	867678.9722	0.380307198	0.619127691	0.238820493	0.482005979	0.047537436	338.368197	11.49	29.75	18.26	22.59	4.82	15854.92	1
277.2028503	337.0813293	59.878479	314.2552701	11.79271268	220921.4549	-0.67912209	0.545651495	1.224773586	-0.002195985	0.229464175	-1.543777706	-1.053222656	0.952148438	2.005371094	0.009650327	0.387284862	6.784179688	1225.275635	1339.308472	114.0328369	1285.148718	28.86143287	903459.5486	0.436460763	0.586021245	0.149560481	0.512885302	0.029614808	360.5583675	13.05	30.60	17.56	21.64	3.60	15215.07	1
0.042105675	359.6761475	359.6340418	37.69864842	35.81960237	26502.14984	-0.620878696	0.485073239	1.105951935	0.023917966	0.200870248	16.81433035	-1.193115234	0.853027344	2.046142578	0.036738128	0.335252952	25.8269043	1194.331665	1329.442139	135.1104736	1259.912904	34.50303595	885718.7715	0.441156477	0.575640321	0.134483844	0.50053255	0.025935318	351.8743824	14.42	31.59	17.18	24.19	3.69	17008.88	1
302.232605	343.1844177	40.95181274	325.7070682	9.845570322	229949.1902	-0.678975463	0.565592408	1.244567871	-0.03793763	0.192088152	-26.78396673	-0.917602539	1.035400391	1.95300293	-0.054965703	0.313396723	-38.80578613	1163.961182	1284.752563	120.7913818	1226.216384	30.27773293	865708.7672	0.441742986	0.57777065	0.136027664	0.504656955	0.026707892	356.28781	16.04	29.21	13.17	22.61	3.12	15965.76	1
0.00937101	359.9129944	359.9036234	314.9203326	73.98872634	222333.7548	-0.792105198	0.455248624	1.247353822	-0.1703451	0.206912927	-120.2636407	-1.125732422	0.749023438	1.874755859	-0.161126761	0.325040488	-113.7554932	1187.866089	1305.302368	117.4362793	1249.783345	30.26107429	882347.0417	0.459515363	0.617769063	0.1582537	0.53128151	0.031853297	375.0847462	14.26	28.03	13.77	22.13	3.78	15622.17	1
215.3036346	305.3058167	90.00218201	233.2134221	17.20926829	163016.182	-0.902194917	0.463973641	1.366168559	-0.089465529	0.277163902	-62.53640476	-1.141967773	1.103759766	2.245727539	-0.091527761	0.422559127	-63.97790527	1142.754395	1264.118408	121.3640137	1202.821647	30.04070886	840772.3313	0.434720784	0.699618578	0.264897794	0.541251	0.055883305	378.3344487	15.61	29.76	14.15	22.78	2.89	15921.52	1
148.9239502	250.0795135	101.1555634	193.5924911	22.47760546	136095.5213	-0.847283483	0.639173627	1.486457109	-0.110289134	0.305436376	-77.53326094	-1.127319336	1.172119141	2.299438477	-0.11299422	0.443418587	-79.43493652	1147.375854	1267.180542	119.8046875	1212.027304	31.06409924	852055.1945	0.407550007	0.736551821	0.329001814	0.547362801	0.07434963	384.7960488	13.41	32.37	18.96	24.00	3.41	16873.47	1
178.9017334	249.1629944	70.26126099	223.6122602	16.74980861	157870.2557	-0.732756734	0.609933078	1.342689812	-0.066943574	0.291342798	-47.2621632	-0.976074219	1.154052734	2.130126953	-0.044112511	0.451954634	-31.14343262	1140.865356	1270.005127	129.1397705	1206.310116	35.20857295	851654.9419	0.40255928	0.783958018	0.381398737	0.5347661	0.091003833	377.5448667	12.19	31.54	19.35	25.27	3.60	17842.00	1
58.14374161	103.72258	45.57883835	83.9007755	9.517444704	59233.9475	-0.323509246	0.345387101	0.668896347	-0.027641894	0.117596677	-19.51517728	-0.698120117	0.692382813	1.39050293	0.035999503	0.234031452	25.41564941	1148.763306	1244.5271	95.76379395	1203.069262	25.32707527	849366.8992	0.486839175	0.635629535	0.148790359	0.539872017	0.02386684	381.1496438	8.06	27.61	19.56	18.23	3.92	12872.90	1
0.167409256	359.9241028	359.7566935	261.6620239	142.9765923	184995.0509	-0.750248611	0.444875389	1.195124	-0.038990187	0.204042732	-27.5660619	-0.919799805	0.614013672	1.533813477	-0.072091757	0.302447129	-50.96887207	1133.107056	1261.392456	128.2854004	1194.099606	32.35721249	844228.4218	0.420158744	0.682020247	0.261861503	0.504205502	0.051717725	356.4732898	15.59	30.86	15.27	23.70	4.19	16753.83	1
13.25668049	43.55821228	30.30153179	26.22441138	6.980964257	18540.65885	-0.310809642	0.477066964	0.787876606	0.088457512	0.126504489	62.53946067	-0.867919922	0.912353516	1.780273438	0.006459022	0.250236272	4.56652832	1087.343384	1245.403687	158.0603027	1157.769987	40.6824754	818543.3811	0.384226143	0.655577958	0.271351814	0.460177524	0.043992125	325.3455097	19.62	35.95	16.33	28.37	3.44	20058.68	1
85.49528503	127.2556152	41.7603302	105.4223865	8.218951924	74322.78248	-0.457697451	0.368476003	0.826173455	-0.070031236	0.139156056	-49.37202145	-1.007080078	0.91027832	1.917358398	-0.144982997	0.265750173	-102.2130127	1134.724121	1265.311035	130.5869141	1193.770239	34.87285785	841608.0187	0.384620667	0.662137926	0.277517259	0.492559682	0.064571743	347.2545757	12.34	30.01	17.67	24.43	3.97	17220.71	1
227.840332	255.0539246	27.21359253	239.0887254	5.719106557	169035.7288	-0.531579733	0.515088916	1.046668649	0.001045629	0.155849973	0.739259809	-0.843505859	0.962768555	1.806274414	-0.027651775	0.279939717	-19.54980469	1064.095215	1200.553955	136.4587402	1132.844136	35.55748763	800920.8043	0.413628131	0.569401681	0.15577355	0.485544573	0.022857317	343.2800134	19.20	29.48	10.28	25.10	2.12	17743.98	1
226.9368286	261.9243469	34.98751831	248.5847297	8.135179699	175500.8191	-0.204651266	0.424389869	0.629041135	0.073716561	0.109234043	52.04389195	-0.55065918	0.961547852	1.512207031	0.189388286	0.342243747	133.7081299	1138.116333	1282.392822	144.2764893	1215.948998	40.3095347	858459.9926	0.447468638	0.784236252	0.336767614	0.545182952	0.094641464	384.8991639	2.39	33.55	31.16	27.01	5.67	19070.10	1
260.1794434	343.3111877	83.13174438	322.2643119	13.54145134	226229.5469	-0.697000027	0.535773933	1.23277396	-0.0337059	0.219902302	-23.66154182	-1.327392578	0.904052734	2.231445313	-0.101343921	0.384784592	-71.14343262	1105.772095	1236.539063	130.7669678	1166.07445	32.201977	818584.264	0.427030742	0.608993888	0.181963146	0.481309554	0.030410701	337.8793072	11.97	32.78	20.81	22.95	4.48	16112.68	1
0.032463104	359.9927063	359.9602432	119.8431889	156.5295919	84369.60498	-0.628169894	0.347601533	0.975771427	-0.105173641	0.178748036	-74.04224355	-1.025146484	0.609619141	1.634765625	-0.195976257	0.289807538	-137.9672852	1119.029907	1224.666382	105.6364746	1164.388989	26.60615277	819729.848	0.353086025	0.683707535	0.330621511	0.471746415	0.06968041	332.1094764	6.48	28.05	21.57	19.75	5.51	13903.20	1
12.63928127	333.2529297	320.6136484	228.5553938	29.66672124	161360.108	-0.473566592	0.325513124	0.799079716	-0.095601899	0.148909911	-67.49494099	-1.602539063	0.641723633	2.244262695	-0.243049254	0.328892768	-171.5927734	1099.051514	1196.565308	97.51379395	1137.67119	27.57580376	803195.8602	0.237738803	0.651307344	0.413568541	0.44212906	0.073214046	312.1431164	0.35	33.71	33.37	20.05	7.63	14155.07	1
27.52003288	299.0812073	271.5611744	244.7300885	57.60327294	173024.1726	-0.691481471	0.483766675	1.175248146	-0.094852437	0.226789629	-67.06067326	-1.178955078	0.856323242	2.03527832	-0.314331055	0.395086637	-222.2320557	1096.322754	1190.590942	94.26818848	1132.786706	29.04209383	800880.2009	0.209733412	0.747864366	0.538130954	0.416610743	0.102511088	294.5437951	0.34	31.31	30.97	21.17	9.65	14969.70	1
0.674924314	358.8575745	358.1826501	65.68569392	46.234436	45979.98575	-1.381705523	0.709637761	2.091343284	-0.018170051	0.242021638	-12.71903536	-1.9140625	1.164306641	3.078369141	-0.116197248	0.630846317	-81.33807373	1005.156982	1093.645996	88.48901367	1050.12898	29.77140002	735090.2858	0.287458479	0.702560067	0.415101588	0.47106574	0.111182652	329.746018	0.24	32.49	32.25	19.39	8.57	13576.28	1
32.67650223	174.8560944	142.1795921	67.83097693	25.71011346	47617.34581	-0.417468548	0.365927666	0.783396214	-0.133740794	0.112323004	-93.88603752	-1.261108398	0.514770508	1.775878906	-0.322089301	0.283288068	-226.1066895	1103.747437	1212.35144	108.6040039	1146.355943	31.15666977	804741.8723	0.244786784	0.595146596	0.350359812	0.421473176	0.078330779	295.8741692	1.14	31.70	30.56	21.88	8.74	15360.18	1
0.177094102	359.758728	359.5816339	41.11285456	55.40067947	28902.33675	-1.67538321	0.509432018	2.184815228	0.017550792	0.26514661	12.33820703	-2.158996582	1.059448242	3.218444824	-0.194040746	0.764158992	-136.4106445	999.7393188	1115.975586	116.2362671	1052.204453	35.29379678	739699.7304	0.341402739	0.689776897	0.348374158	0.47518133	0.100686691	334.052475	0.94	36.14	35.20	24.04	8.16	16902.32	1
24.46238327	49.98630524	25.52392197	33.83106822	3.878709255	23884.73416	-0.313660592	0.335117191	0.648777783	0.002949275	0.103260145	2.08218822	-1.08972168	0.821044922	1.910766602	-0.100118578	0.31212894	-70.68371582	965.9761963	1094.381592	128.4053955	1024.248153	36.39798043	723119.1958	0.295535773	0.587094128	0.291558355	0.443246423	0.075964565	312.9319747	3.97	32.63	28.66	24.50	5.22	17294.20	1
0.289865822	356.0162659	355.7264	173.8920562	46.0270276	122072.2235	-1.398487687	0.419372648	1.817860335	-0.040388285	0.248491688	-28.35257631	-2.118286133	0.958618164	3.076904297	-0.202925288	0.693097034	-142.4535522	1011.508423	1128.519287	117.0108643	1064.032266	36.32329966	746950.6506	0.321911842	0.708097041	0.386185199	0.478962073	0.106654207	336.2313753	0.42	33.87	33.44	23.99	7.85	16840.35	1
0.094300285	359.662323	359.5680227	319.2293846	54.06895521	225375.9455	-0.678727806	0.580361247	1.259089053	0.011044598	0.212855225	7.797485888	-1.116333008	0.681762695	1.798095703	0.005503711	0.276979787	3.885620117	955.7104492	1062.932983	107.2225342	1015.35482	28.56630176	716840.5027	0.427312821	0.598903775	0.171590954	0.499521247	0.029587557	352.6620002	13.32	27.47	14.15	21.25	2.87	15003.23	1
34.00060272	120.5275574	86.52695465	60.82736729	19.30109504	42883.29394	-1.197773457	0.400127977	1.597901434	-0.157261589	0.238385121	-110.8694204	-1.296569824	0.735961914	2.032531738	-0.098405381	0.335894208	-69.37579346	1002.667664	1136.72229	134.0546265	1077.553827	33.15595803	759675.448	0.417023242	0.633697689	0.216674447	0.536052156	0.039900865	377.91677	16.43	32.57	16.14	23.94	2.84	16879.49	1
0.381880701	359.9589844	359.5771037	295.8625433	113.3885911	208878.9556	-0.795713246	0.592079461	1.387792706	-0.021570325	0.245086042	-15.22864945	-1.423461914	1.435058594	2.858520508	0.073427714	0.525141146	51.83996582	954.9017944	1082.605957	127.7041626	1025.688336	34.58602731	724135.9653	0.311727196	0.692019284	0.380292088	0.507058324	0.074296727	357.9831766	3.89	33.11	29.22	24.36	5.53	17200.47	1
1.724553227	357.5669861	355.8424329	117.4082503	62.3471474	83242.44946	-1.497012615	0.328864127	1.825876743	-0.158396553	0.276074135	-112.3031564	-1.773071289	0.854003906	2.627075195	-0.324777622	0.516416417	-230.267334	1040.734497	1156.865967	116.1314697	1095.298611	29.89058347	776566.7153	0.433932811	0.563885808	0.129952997	0.497012562	0.028107959	352.3819062	5.89	32.19	26.29	21.88	5.64	15515.12	1
46.40658188	349.1551514	302.7485695	154.9919608	45.70426564	109114.3404	-1.78903687	0.638771772	2.427808642	0.043858871	0.213033394	30.87664494	-2.015869141	1.209594727	3.225463867	-0.120276451	0.688485665	-84.67462158	994.6270752	1094.311035	99.68395996	1042.030393	29.96942334	733589.3964	0.301966012	0.669311047	0.367345035	0.466140787	0.089921377	328.1631139	0.62	30.74	30.12	20.18	7.30	14208.09	1
0.944406271	87.55137634	86.60697007	41.23826715	25.5265656	29031.74008	-0.680405378	0.1284291	0.808834478	-0.255742533	0.148744514	-180.0427429	-1.890258789	0.959594727	2.849853516	-0.401170731	0.399446929	-282.4241943	1098.546631	1233.536377	134.9897461	1164.646908	37.73401275	819911.4236	0.18059504	0.57677412	0.39617908	0.464716863	0.092252898	327.1606719	3.51	38.76	35.25	27.63	6.05	19454.48	1
193.8204041	274.7589417	80.9385376	233.2180066	25.50546453	164185.4767	-0.677295387	0.442053735	1.119349122	-0.15698877	0.191105814	-110.520094	-1.652954102	1.450439453	3.103393555	-0.286058773	0.416859431	-201.385376	1098.340332	1210.795288	112.4549561	1157.827478	31.09036043	815110.5442	0.237922028	0.592998981	0.355076954	0.454504281	0.073754892	319.9710138	5.98	34.69	28.70	23.67	5.38	16662.83	1
176.862442	320.3117371	143.449295	258.2249134	42.29126524	182048.5639	-1.585400224	0.468370497	2.053770721	-0.218420802	0.308902733	-153.9866657	-1.98059082	0.879150391	2.859741211	-0.231714733	0.461063559	-163.3588867	1054.774902	1141.939209	87.16430664	1105.396653	19.67304109	779304.6406	0.475032359	0.661946416	0.186914057	0.560744695	0.04545758	395.3250097	10.67	32.60	21.93	17.71	4.01	12483.67	1
0.194437161	359.938324	359.7438868	92.26687674	114.3248125	64863.61435	-0.75384897	0.514575124	1.268424094	-0.205206353	0.211275009	-144.2600661	-0.949584961	1.01550293	1.965087891	-0.230283127	0.314445502	-161.8890381	1045.380737	1153.668701	108.2879639	1107.805756	27.69712374	778787.4468	0.467758805	0.613488913	0.145730108	0.536542144	0.029877811	377.1891274	12.12	30.22	18.10	21.55	4.52	15147.70	1
0.029310064	359.6492004	359.6198904	245.3910871	148.4215847	172755.3253	-0.858538687	0.450612456	1.309151143	-0.108572645	0.195081552	-76.4351418	-0.852416992	0.729125977	1.581542969	-0.136293064	0.247226549	-95.95031738	1094.190918	1177.523682	83.33276367	1137.982843	20.80906738	801139.9211	0.362363517	0.627838373	0.265474856	0.51141111	0.067235081	360.0334212	11.78	23.16	11.38	16.95	2.70	11932.03	1
62.6367836	148.9269562	86.29017258	95.69348081	25.39856313	67655.29093	-0.88038528	0.362615705	1.243000984	-0.179727096	0.192885375	-127.0670567	-0.994873047	1.153198242	2.148071289	-0.17370053	0.379925393	-122.8062744	1105.71106	1218.71167	113.0006104	1167.206991	26.46029308	825215.3427	0.369115293	0.653544188	0.284428895	0.520303213	0.061842828	367.8543714	9.83	31.12	21.29	20.81	3.18	14710.91	1
145.7621765	300.6826477	154.9204712	196.1564291	32.84250801	138486.4389	-1.145619154	0.286098957	1.431718111	-0.236103537	0.229439636	-166.6890968	-1.545349121	0.662231445	2.207580566	-0.387186023	0.343586223	-273.3533325	968.2080078	1072.248047	104.0400391	1016.974351	24.00365888	717983.8917	0.407249033	0.590507329	0.183258295	0.494434168	0.039953929	349.0705225	9.02	31.26	22.24	20.01	5.49	14125.13	1
0.039186087	359.9532166	359.9140305	229.7827756	143.0230991	161767.0741	-0.920673668	0.373944938	1.294618607	-0.153651418	0.195148946	-108.1705984	-1.07800293	0.672119141	1.75012207	-0.106517445	0.284532576	-74.98828125	1085.898682	1181.230469	95.33178711	1143.794827	22.41855714	805231.5582	0.418174207	0.652645826	0.234471619	0.566998704	0.046040197	399.1670876	8.13	29.19	21.06	17.96	3.90	12642.89	1
10.06630039	351.924469	341.8581686	173.6498065	37.25153646	122770.4132	-0.803014338	0.531712651	1.334726989	0.067041069	0.21291777	47.39803563	-1.022094727	1.183898926	2.205993652	-0.090359916	0.367610621	-63.88446045	908.644165	1015.870361	107.2261963	949.6951822	27.60049124	671434.4938	0.262274057	0.525582671	0.263308614	0.409689663	0.051819467	289.6505919	0.86	30.01	29.15	19.39	6.39	13708.30	1
208.5595093	267.6095276	59.05001831	229.0366241	10.10512228	161928.8932	-0.250576258	0.432814717	0.683390975	0.021105082	0.120612531	14.92129276	-0.981323242	0.722229004	1.703552246	-0.086786899	0.30376475	-61.3583374	895.9933472	981.067627	85.07427979	930.6379819	22.093198	657961.0532	0.194800869	0.525788128	0.33098726	0.401803437	0.07195945	284.0750301	2.86	24.42	21.56	16.27	4.95	11499.62	1
117.1599197	245.6372681	128.4773483	189.2838669	32.13657556	133823.6939	-0.87125504	0.804859817	1.676114857	-0.217524869	0.316604112	-153.7900821	-1.242797852	0.956298828	2.19909668	-0.158025804	0.419811792	-111.7242432	1035.11792	1136.876709	101.7587891	1096.924162	25.10822552	775525.3827	0.520204544	0.680912256	0.160707712	0.591231502	0.030869119	418.0006717	11.31	29.76	18.45	20.53	4.12	14516.37	1
89.13700867	180.5811157	91.44410706	134.7388531	22.2567332	95125.63029	-0.860738099	0.66176945	1.522507548	-0.064266664	0.295759281	-45.37226495	-1.076538086	0.675415039	1.751953125	-0.015332619	0.366020945	-10.8248291	1067.514282	1167.640991	100.126709	1125.916191	24.46789643	794896.8312	0.388584763	0.616089642	0.227504879	0.546887237	0.048740031	386.1023894	10.80	25.10	14.30	18.44	3.57	13018.66	1
1.360533237	351.6379089	350.2773757	115.7057418	57.47121822	82266.78242	-1.289343357	0.452033818	1.741377175	-0.050693153	0.232908978	-36.04283156	-1.70513916	1.139404297	2.844543457	-0.169059056	0.635151312	-120.2009888	1013.401001	1116.008911	102.6079102	1060.89001	30.91819727	754292.7971	0.353470713	0.795092762	0.441622049	0.49322611	0.094634155	350.6837645	0.06	31.07	31.01	20.28	7.77	14421.13	1
24.61621094	91.2631073	66.64689636	53.33120364	14.68302587	37705.16097	-0.567919195	0.4635728	1.031491995	-0.086103991	0.169486826	-60.87552144	-0.975708008	0.639892578	1.615600586	-0.231160079	0.243810285	-163.4301758	1108.909058	1193.006714	84.09765625	1142.070562	21.56865177	807443.8876	0.27165544	0.582961977	0.311306536	0.425135447	0.051610221	300.5707612	4.17	30.87	26.70	16.49	5.55	11661.41	1
2.755562067	358.9683533	356.2127912	276.1116538	39.59548351	195210.9392	-1.343398333	0.501090705	1.844489038	-0.149051995	0.354616618	-105.3797602	-1.583984375	1.338745117	2.922729492	-0.239798237	0.56377723	-169.5373535	1020.194397	1118.282715	98.08831787	1063.132167	24.11345259	751634.4421	0.408334702	0.659661591	0.251326889	0.534067175	0.058516992	377.5854924	9.79	28.41	18.63	18.24	4.70	12896.47	1
111.7915421	191.9916534	80.20011139	150.214646	21.66569314	106201.7547	-0.902026653	0.851036966	1.753063619	-0.063492023	0.298669519	-44.8888605	-1.111572266	0.725708008	1.837280273	-0.119163761	0.37495526	-84.2487793	1070.255737	1189.341675	119.0859375	1127.682908	26.22146401	797271.8157	0.363508075	0.598934293	0.235426217	0.487922992	0.067537049	344.9615551	11.60	33.12	21.52	20.35	4.51	14385.42	1
66.5089798	227.3838654	160.8748856	114.6295322	36.9397426	81157.70878	-1.23636663	0.363380939	1.599747568	-0.161234318	0.302860417	-114.1538974	-1.517578125	1.076782227	2.594360352	-0.10482995	0.639878497	-74.21960449	1026.878418	1127.307251	100.428833	1085.155587	29.55764542	768290.1558	0.409211755	0.85245508	0.443243325	0.612572932	0.120039145	433.7016356	0.70	32.75	32.05	19.10	9.14	13525.67	1
5.259534359	135.5689545	130.3094201	70.93087812	21.97800476	49864.40732	-0.474319667	0.249987066	0.724306732	-0.106678592	0.121115436	-74.99505004	-1.489868164	0.627807617	2.117675781	-0.357489422	0.405679738	-251.3150635	1118.83728	1243.19873	124.3614502	1157.889405	35.36863009	813996.2516	0.110826753	0.702038765	0.591212012	0.356888888	0.130843105	250.8928884	0.53	36.37	35.84	22.84	12.46	16056.69	1
149.6323242	192.7684021	43.13607788	178.6637698	8.114743772	125957.9577	-0.849131346	0.824615598	1.673746943	0.021397298	0.261606866	15.08509475	-2.0703125	1.388671875	3.458984375	-0.184604423	0.513064367	-130.1461182	1131.620728	1254.621338	123.0006104	1175.115717	35.05046284	828456.5806	0.130968407	0.532003343	0.401034936	0.359310021	0.12018802	253.3135649	1.37	34.59	33.22	22.95	10.01	16179.17	1
0.104413673	359.9950867	359.890673	42.80681739	57.97082088	30178.80626	-0.553123176	0.928361833	1.481485009	-0.051439233	0.259243773	-36.26465934	-1.142089844	1.513549805	2.655639648	-0.235425151	0.416639477	-165.9747314	1121.949463	1219.769653	97.82019043	1163.31069	25.28396825	820134.0364	0.277384162	0.506030738	0.228646576	0.407275497	0.044088603	287.1292254	4.22	34.50	30.28	19.70	6.05	13885.54	1
4.655079365	346.1246948	341.4696155	129.830711	71.71320233	91270.98987	-1.298226595	0.521046877	1.819273472	0.030999532	0.208965843	21.79267073	-1.827148438	1.056274414	2.883422852	-0.169261515	0.689473861	-118.9908447	1032.221191	1120.179077	87.95788574	1069.491353	28.95439371	751852.421	0.327804655	0.695443153	0.367638499	0.483955361	0.119579898	340.2206187	0.66	29.22	28.55	20.19	8.01	14193.67	1
0.680063009	359.4342346	358.7541716	117.0500757	132.724982	82286.20321	-0.46710819	0.18754907	0.65465726	-0.158315523	0.116988936	-111.2958129	-1.298828125	0.815673828	2.114501953	-0.334798061	0.350616075	-235.3630371	1128.947266	1209.715332	80.76806641	1165.81242	21.18691449	819566.1311	0.320797503	0.575231791	0.254434288	0.435632948	0.055523204	306.2499624	2.92	31.42	28.51	17.04	5.88	11976.74	1
0.803028405	359.2727661	358.4697377	284.3156705	67.21627287	199589.6007	-1.207108259	0.449631184	1.656739444	0.028861059	0.235114718	20.26046311	-1.523376465	1.070800781	2.594177246	-0.085629281	0.554399459	-60.11175537	1015.409607	1120.776978	105.3673706	1062.167422	28.44835195	745641.5306	0.30837208	0.651638865	0.343266785	0.478492268	0.082733685	335.9015725	0.95	31.88	30.93	20.19	5.79	14174.91	1
5.780970097	357.7103271	351.9293571	326.5856234	32.54360062	231875.7926	-1.177128792	0.491730064	1.668858856	0.01512082	0.152182689	10.73578192	-1.612426758	0.981811523	2.594238281	-0.063818617	0.470431117	-45.31121826	1010.028564	1121.425781	111.3972168	1062.001039	30.89046141	754020.7379	0.285462439	0.679553032	0.394090593	0.487129669	0.106571413	345.8620652	1.82	30.30	28.48	21.55	5.35	15299.69	1
0.042451028	359.9271851	359.884734	75.7346726	113.1013676	53014.27082	-1.296508551	0.774576008	2.071084559	-0.119107357	0.34638489	-83.37514985	-1.530029297	1.441894531	2.971923828	-0.058568464	0.521532153	-40.9979248	1037.419189	1126.072632	88.65344238	1090.874436	23.39801629	763612.1053	0.393068433	0.766132593	0.37306416	0.588020772	0.069477842	411.6145407	9.42	30.17	20.75	18.59	5.21	13013.21	1
7.969913483	333.5280457	325.5581322	51.96281201	40.78087281	36529.85685	-1.419840097	0.389914304	1.809754401	0.052344617	0.141079225	36.79826541	-1.782104492	1.010742188	2.79284668	-0.035015513	0.616392884	-24.61590576	1013.618469	1128.988159	115.3696899	1069.792726	35.68610528	752064.2867	0.2683056	0.675025344	0.406719744	0.465584569	0.120461712	327.3059519	1.74	33.62	31.89	22.95	7.44	16134.47	1
212.4365234	285.9096985	73.47317505	244.4714991	16.92082231	172596.8784	-0.437630355	0.540547132	0.978177488	-0.067518311	0.213996314	-47.66792741	-0.925415039	0.672973633	1.598388672	-0.152468241	0.31433465	-107.6425781	1122.500488	1227.918945	105.418457	1173.916789	26.25555308	828785.2529	0.374710143	0.581547916	0.206837773	0.475952794	0.047630431	336.0226726	12.61	32.03	19.42	19.71	2.86	13913.41	1
151.1290741	329.0152588	177.8861847	288.2085554	40.96014963	202610.6144	-1.317419529	0.524819434	1.842238963	-0.144460715	0.328110038	-101.5558827	-1.996459961	0.946533203	2.942993164	-0.187222694	0.538386586	-131.6175537	1047.527954	1137.365112	89.8371582	1097.279748	22.42693637	771387.663	0.39316982	0.688924789	0.295754969	0.542890069	0.062250366	381.6517189	2.05	27.18	25.13	16.79	5.39	11799.97	1
0.184719652	356.0437012	355.8589815	103.3091343	74.27696145	72729.63056	-1.584910631	0.417958677	2.002869308	0.054215662	0.213462201	38.16782618	-1.918945313	1.160766602	3.079711914	-0.251820044	0.750694691	-177.281311	1022.363403	1129.182739	106.8193359	1064.226957	31.47421741	749215.7778	0.343473136	0.704310715	0.360837579	0.464751006	0.112137347	327.1847082	0.68	33.63	32.95	23.48	7.54	16529.30	1
0.119921766	359.6802979	359.5603761	114.8095927	46.47818345	81400.00121	-1.344234228	0.422115743	1.766349971	-0.033963121	0.280229729	-24.07985306	-1.520019531	1.022949219	2.54296875	0.00232915	0.605526923	1.651367188	1048.910278	1136.153076	87.24279785	1102.582625	27.03622079	781731.0808	0.251624405	0.754416168	0.502791762	0.542343242	0.112676294	384.5213583	0.30	29.43	29.13	17.18	9.19	12181.20	1
177.5265808	248.5193634	70.99278259	206.8862045	18.24325759	144613.4569	-0.439390779	0.86771512	1.307105899	-0.06802498	0.227478907	-47.54946122	-0.999755859	1.044921875	2.044677734	-0.182247658	0.398226867	-127.3911133	1119.229736	1237.429565	118.1998291	1173.762754	27.79643106	820460.1652	0.253724635	0.561297238	0.307572603	0.443446427	0.054142002	309.9690527	11.81	32.22	20.41	22.06	5.46	15419.86	1
83.35805511	200.35495	116.9968948	158.1071236	36.11727671	110674.9865	-0.827153027	0.330652595	1.157805622	-0.166923999	0.23332609	-116.8467991	-1.419067383	0.599731445	2.018798828	-0.367118966	0.330382103	-256.9832764	1140.977051	1243.495117	102.5180664	1180.895132	25.97821678	826626.5922	0.252772808	0.514217436	0.261444628	0.405369648	0.064719454	283.7587535	4.78	32.51	27.74	20.98	7.71	14685.58	1
0.036746398	359.9906616	359.9539152	141.809021	148.030637	100258.9778	-0.584653914	0.485036284	1.069690198	-0.122780081	0.186515518	-86.80551737	-1.94152832	1.128662109	3.07019043	-0.28174726	0.4353861	-199.1953125	1134.957397	1226.812378	91.85498047	1176.147538	24.27973013	831536.3091	0.295104742	0.585694551	0.290589809	0.442473641	0.058904223	312.828864	4.73	38.01	33.28	18.92	7.24	13375.12	1
3.606687784	359.2328796	355.6261919	218.0326174	47.07108931	154367.0931	-1.226969242	0.577962399	1.804931641	0.062627587	0.226363072	44.34033182	-1.577392578	1.075805664	2.653198242	-0.042253915	0.593331817	-29.91577148	1036.461304	1140.160889	103.699585	1084.634023	31.18737161	767920.8882	0.304215997	0.640900791	0.336684793	0.485942608	0.094866692	344.0473667	0.56	32.28	31.72	20.68	7.29	14643.35	1
0.474057883	353.4637756	352.9897178	311.215572	33.09526478	218784.5471	-1.332684755	0.377420962	1.710105717	0.021270884	0.177271537	14.95343166	-1.629394531	0.896362305	2.525756836	-0.046993771	0.492709223	-33.03662109	1024.168457	1146.03418	121.8657227	1082.727291	32.40378122	761157.2856	0.352815449	0.607710421	0.254894972	0.500114583	0.055693625	351.5805516	3.56	30.78	27.22	22.54	5.43	15845.10	1
0.007700281	359.3562927	359.3485924	113.2956262	112.3751527	79760.12083	-1.418817401	0.281107247	1.699924648	-0.307156655	0.292527659	-216.2382853	-1.727050781	0.789794922	2.516845703	-0.258394762	0.551165271	-181.9099121	1061.209106	1165.870605	104.661499	1123.840083	25.30442897	791183.4186	0.461931527	0.706676543	0.244745016	0.592473105	0.054326754	417.1010662	8.57	33.76	25.19	20.87	5.07	14693.44	1
9.879322052	76.95207214	67.07275009	49.93847365	14.73070679	34906.99308	-0.803378463	0.740104675	1.543483138	-0.033594233	0.249946359	-23.48236904	-1.193603516	1.253295898	2.446899414	-0.020011323	0.411617629	-13.98791504	1053.286377	1160.138306	106.8519287	1108.959842	27.30718646	775162.9298	0.377292991	0.657362759	0.280069768	0.517082251	0.050837064	361.4404936	13.20	28.62	15.42	20.90	3.35	14611.37	1
84.87230682	238.4561462	153.5838394	128.650811	33.63633077	90827.47258	-0.842010379	1.061020732	1.903031111	-0.184810172	0.258213552	-130.4759817	-1.459472656	1.067871094	2.52734375	-0.294195159	0.419526451	-207.7017822	1172.402222	1277.93811	105.5358887	1218.828768	26.35281716	860493.1102	0.372286826	0.533475876	0.161189049	0.463519993	0.028563045	327.2451154	3.57	31.15	27.58	20.74	5.39	14645.23	1
31.9964962	204.8945313	172.898035	66.32086127	41.8104006	46888.84892	-1.381674409	0.568539619	1.950214028	-0.030108332	0.246821252	-21.28659084	-1.646240234	1.070800781	2.717041016	-0.088081759	0.577129972	-62.27380371	1035.921631	1135.036621	99.11499023	1082.941154	30.35207988	765639.3961	0.243746564	0.830843627	0.587097064	0.512435938	0.156890693	362.2922082	3.61	30.78	27.17	20.10	7.42	14212.27	1
0.042361293	358.7368164	358.6944551	285.5016839	92.51558806	200993.1855	-1.62332356	0.539311469	2.162635028	-0.04567072	0.295091657	-32.15218715	-1.941650391	1.255493164	3.197143555	-0.219236894	0.76720488	-154.3427734	1036.241943	1133.003052	96.7611084	1080.169224	30.02559812	760439.134	0.307120681	0.776854694	0.469734013	0.503539782	0.136236815	354.4920065	0.19	36.33	36.14	22.04	8.97	15515.78	1
237.0328217	324.89151	87.85868835	272.7692704	22.99361068	192029.5663	-0.948035955	0.465577424	1.413613379	-0.145641445	0.195397043	-102.5315771	-1.053344727	0.837646484	1.890991211	-0.176885085	0.389225152	-124.5270996	988.8629761	1078.898315	90.03533936	1033.238543	22.23428852	727399.9344	0.405035138	0.683687747	0.278652608	0.515063591	0.068103047	362.6047684	8.28	28.76	20.47	18.76	5.28	13204.44	1
193.7466431	280.8154602	87.06881714	232.4367982	21.15362842	163867.9427	-0.880798697	0.732347667	1.613146365	-0.024092385	0.322463032	-16.98513126	-1.097229004	0.991027832	2.088256836	-0.073701899	0.431209884	-51.95983887	944.96875	1035.021973	90.05322266	986.2876061	22.72845319	695332.7623	0.304941207	0.606315374	0.301374167	0.488495289	0.073089142	344.3891788	10.56	25.73	15.17	17.74	3.17	12506.77	1
13.51834583	135.4468842	121.9285383	89.14961402	30.88893734	62850.47788	-1.036336899	0.619629741	1.65596664	-0.273234783	0.349163667	-192.6305221	-1.312866211	1.159545898	2.472412109	-0.349183514	0.491641257	-246.1743774	959.324585	1082.33728	123.0126953	1023.862372	32.18039067	721822.9724	0.42830053	0.609434128	0.181133598	0.511171796	0.031049777	360.3761163	14.62	32.19	17.57	24.45	3.80	17238.80	1
54.52020645	105.7481689	51.22796249	79.95059052	9.418380043	56445.11691	-0.377592474	0.542613745	0.920206219	0.007468861	0.143465624	5.273016169	-1.096679688	0.973022461	2.069702148	-0.039395946	0.324349186	-27.8135376	896.5664063	1008.653076	112.0866699	948.6897047	27.76365265	669774.9315	0.31816107	0.56326443	0.245103359	0.454854698	0.048557966	321.1274169	14.24	30.36	16.13	21.47	3.32	15156.92	1
31.01654243	117.9604187	86.94387627	72.47004339	27.47587265	51018.91054	-0.672435105	0.352462173	1.024897277	-0.124491738	0.206657153	-87.64218348	-1.054931641	0.528442383	1.583374023	-0.187042236	0.315852702	-131.6777344	1038.840454	1139.91333	101.072876	1087.992304	26.29000955	765946.5822	0.385188729	0.663340211	0.278151482	0.499507869	0.054075671	351.6535395	10.96	30.18	19.22	20.86	4.99	14686.80	1
0.007681333	359.9818726	359.9741912	155.8007318	155.6324299	110151.1174	-1.093560815	0.509824812	1.603385627	-0.066376866	0.204324351	-46.9284444	-1.284545898	0.47277832	1.757324219	-0.339529078	0.290434919	-240.0470581	951.4984131	1055.329834	103.8314209	988.7952507	24.65026417	699078.2422	0.316638917	0.484134197	0.167495281	0.401223831	0.03228381	283.6652483	0.83	34.97	34.14	18.97	8.12	13414.32	1
135.6538696	180.8907166	45.23684692	154.0729572	7.768966905	108929.5808	-0.449133426	0.467205495	0.916338921	0.012676259	0.158550792	8.962115007	-1.026428223	0.636352539	1.662780762	-0.057320645	0.279178955	-40.5256958	992.4082642	1106.579224	114.1709595	1042.791669	30.68535245	737253.7101	0.318722188	0.590944231	0.272222042	0.452659199	0.066527134	320.0300534	10.91	29.38	18.47	22.35	3.46	15800.86	1
102.3777771	151.813385	49.43560791	116.5446008	11.37904614	81814.30975	-0.447801441	0.342867136	0.790668577	-0.056711691	0.115997712	-39.81160676	-0.924560547	0.954589844	1.879150391	-0.063073661	0.322037922	-44.27770996	1015.391541	1134.196045	118.8045044	1074.367523	32.18557003	754206.0012	0.421155304	0.642128229	0.220972925	0.509418046	0.057358776	357.611468	10.50	28.97	18.47	22.09	4.15	15509.55	1
178.9438171	284.500885	105.5570679	254.5971946	20.17735496	178218.0362	-0.706872284	0.24634479	0.953217074	-0.123752431	0.169376211	-86.62670203	-0.860229492	0.614624023	1.474853516	-0.147669155	0.244338404	-103.3684082	1034.252563	1134.240723	99.98815918	1085.392478	25.98445442	759774.7344	0.438258886	0.646045506	0.20778662	0.518467096	0.034774425	362.9269673	12.26	23.79	11.53	19.21	2.61	13446.00	1
0.533753514	345.9637451	345.4299916	107.1729665	25.00475354	74913.90356	-1.096368432	0.522753417	1.61912185	-0.135071407	0.278116369	-94.41491377	-1.472045898	0.845336914	2.317382813	-0.260268576	0.425583001	-181.9277344	974.5286865	1090.282959	115.7542725	1026.449598	29.28779785	717488.2692	0.33636415	0.608088255	0.271724105	0.474294009	0.059101013	331.5315125	2.59	28.93	26.34	21.40	4.51	14958.37	1
0.419765532	359.9544067	359.5346412	124.6195755	157.1432374	87358.32243	-0.847490191	0.671367884	1.518858075	-0.02706321	0.350884838	-18.97131045	-1.085876465	1.08581543	2.171691895	0.012178647	0.449223544	8.537231445	985.7963257	1115.774536	129.9782104	1054.69483	35.18884994	739341.076	0.401570797	0.691299438	0.289728642	0.538536403	0.068961553	377.5140184	14.73	33.96	19.23	24.80	3.77	17382.26	1
164.6459351	231.5448608	66.89892578	192.1661654	13.24357806	135861.4789	-0.871088445	0.44267261	1.313761055	-0.146313946	0.23269687	-103.44396	-1.14831543	1.100463867	2.248779297	-0.104500907	0.361752942	-73.88214111	1023.193298	1155.884644	132.6913452	1098.12825	35.02380846	776376.673	0.433817625	0.664002657	0.230185032	0.551843207	0.057212603	390.1531473	16.42	29.95	13.53	24.26	3.54	17154.61	1
83.78501892	232.3660278	148.5810089	142.5404022	22.84796451	100348.4432	-1.388077617	0.282113343	1.67019096	-0.32649186	0.346576304	-229.8502696	-1.795166016	1.01159668	2.806762695	-0.28946339	0.611576849	-203.7822266	1030.087036	1186.81543	156.7283936	1112.950474	42.21798143	783517.1335	0.465114176	0.67332983	0.208215654	0.559960148	0.056302215	394.211944	15.38	35.36	19.98	28.55	4.69	20096.78	1
133.7011414	217.7845764	84.08343506	181.0344278	17.61655986	127267.2027	-0.743255258	0.601412594	1.344667852	0.012587139	0.261992911	8.848758578	-0.923950195	0.983520508	1.907470703	0.038366196	0.352786819	26.97143555	1096.00293	1187.590454	91.58752441	1144.825904	20.51547785	804812.6104	0.416706115	0.643354297	0.226648182	0.533249485	0.057583635	374.8743881	4.30	22.01	17.70	15.95	3.70	11213.11	1
172.6279602	341.1271973	168.4992371	315.7293017	39.4234218	222273.4284	-1.378502488	0.51424408	1.892746568	-0.069875105	0.233051297	-49.19207401	-1.577392578	0.915588379	2.492980957	-0.296487895	0.458724905	-208.727478	973.822876	1090.964355	117.1414795	1021.068764	31.18412476	718832.4099	0.301772058	0.563591599	0.261819541	0.437207586	0.055932716	307.7941404	2.33	31.30	28.97	22.45	6.74	15803.53	1
150.7154999	227.0024567	76.28695679	192.7285018	17.86801551	134524.4943	-0.620278597	0.717683256	1.337961853	0.134469223	0.263682357	93.85951777	-0.822875977	1.430297852	2.253173828	0.18621284	0.409619648	129.9765625	1032.622559	1140.17981	107.557251	1090.189071	31.14888277	760951.9718	0.368704945	0.654816329	0.286111385	0.508790612	0.070325125	355.1358469	12.36	34.46	22.09	22.52	5.33	15716.61	1
111.6200943	155.4472198	43.82712555	143.1631818	6.519267722	100786.88	-0.431278169	0.742935598	1.174213767	0.043582526	0.209749242	30.68209801	-0.792114258	1.112792969	1.904907227	0.091343533	0.354288365	64.30584717	1012.044739	1142.839478	130.7947388	1081.342719	36.65620508	761265.2739	0.414577246	0.644322336	0.22974509	0.520901899	0.06364481	366.7149369	13.01	32.61	19.61	24.87	4.38	17511.25	1
3.261889935	353.3571167	350.0952268	103.1354048	26.29639536	73123.00199	-1.261450052	0.574178934	1.835628986	0.007209821	0.205806803	5.111763215	-1.606018066	1.232788086	2.838806152	-0.041422813	0.533707596	-29.36877441	1007.051636	1126.432617	119.3809814	1060.246169	36.21928434	751714.5336	0.27907455	0.722302258	0.443227708	0.473826935	0.12501674	335.943297	0.78	35.40	34.62	23.28	8.20	16506.01	1
114.9828644	170.968399	55.98553467	136.4457004	12.03439298	95784.88169	-0.879469573	0.40982005	1.289289623	-0.128102875	0.158827727	-89.92821847	-0.88269043	1.12890625	2.01159668	-0.123154512	0.347407086	-86.45446777	1109.761719	1235.858765	126.0970459	1179.794211	31.44139954	828215.5363	0.427169114	0.605211616	0.178042501	0.525285237	0.035596935	368.7502363	15.25	30.44	15.18	22.95	3.30	16114.18	1
312.5443115	352.6051636	40.06085205	329.9984757	6.089825788	231988.9284	-0.440421999	0.393290967	0.833712965	-0.023202675	0.132361472	-16.31148082	-0.827880859	0.704833984	1.532714844	-0.111902012	0.280804714	-78.66711426	1088.430298	1206.450317	118.0200195	1140.105018	29.60222616	801493.8274	0.379064262	0.556395054	0.177330792	0.471237328	0.035457874	331.2798412	12.44	30.12	17.68	21.45	4.00	15081.97	1
144.8647766	207.0802002	62.21542358	178.3779586	15.76257043	126291.5947	-0.543229997	0.355394274	0.898624271	-0.117820064	0.147932228	-83.41660536	-1.42199707	0.591674805	2.013671875	-0.205512785	0.377023619	-145.5030518	1186.734375	1302.661987	115.9276123	1245.567665	25.59317536	881861.9065	0.353972048	0.649302244	0.295330197	0.512214392	0.080425035	362.6477893	12.03	35.17	23.14	21.16	5.60	14978.66	1
111.8229904	167.4041748	55.58118439	146.2200721	12.64493969	103231.3709	-0.405160844	0.695628405	1.100789249	-0.074366652	0.140970981	-52.50285632	-1.010253906	0.980834961	1.991088867	-0.102108358	0.391283609	-72.08850098	1195.004272	1312.648315	117.644043	1248.829618	26.45932856	881673.71	0.356441915	0.662925422	0.306483507	0.504323994	0.080725256	356.0527399	12.97	33.76	20.80	20.92	5.39	14766.55	1
0.48573035	359.6463013	359.1605709	324.1002382	57.79571801	226870.1668	-0.737440646	0.550721049	1.288161695	-0.084315132	0.196373222	-59.02059241	-0.928100586	0.902587891	1.830688477	-0.09743321	0.345921559	-68.20324707	1149.214478	1272.900024	123.6855469	1214.724501	29.69201037	850307.1508	0.372409314	0.62204802	0.249638706	0.509267486	0.062302875	356.48724	12.60	33.70	21.10	22.45	4.75	15716.97	1
0.030058486	359.9964294	359.966371	298.7807385	128.0383435	209744.0784	-0.269548565	0.306258708	0.575807273	0.005928591	0.086813422	4.161870813	-1.239807129	1.398620605	2.638427734	-0.103991995	0.451736707	-73.00238037	974.1203613	1092.528931	118.4085693	1028.502327	31.66978057	722008.6337	0.305249065	0.573895395	0.26864633	0.446497762	0.05882174	313.441429	5.15	32.81	27.66	22.64	5.38	15893.26	1
113.5620041	161.4592743	47.8972702	144.8395412	8.365803843	102546.3952	-0.646736145	0.216671064	0.86340721	-0.076177029	0.122365192	-53.93333635	-1.319458008	0.533325195	1.852783203	-0.112349516	0.321986999	-79.54345703	1101.420654	1227.089478	125.6688232	1164.285814	33.95516916	824314.3562	0.402982265	0.598736286	0.195754021	0.492443878	0.04886069	348.6502657	9.83	31.54	21.71	23.63	3.60	16727.52	1
1.058655262	357.7778015	356.7191463	99.22046501	89.43104232	69751.9869	-1.093935609	0.382296354	1.476231962	-6.45278E-05	0.204567753	-0.045363075	-1.372253418	0.805541992	2.17779541	-0.260539895	0.442552194	-183.1595459	1005.848816	1095.518921	89.67010498	1037.787121	24.66256041	729564.3461	0.300653547	0.601836324	0.301182777	0.39264489	0.061996987	276.0293578	1.32	31.36	30.05	18.27	7.68	12847.05	1
50.98271942	249.3847351	198.4020157	219.8768352	47.28355853	155672.7993	-1.593657851	0.38009268	1.973750532	-0.011649097	0.161129479	-8.247560858	-1.927124023	0.78503418	2.712158203	-0.216875066	0.577730522	-153.5475464	971.7696533	1078.863159	107.0935059	1016.781892	30.48058735	719881.5792	0.359997779	0.5782125	0.21821472	0.466208957	0.052232887	330.0759413	0.54	29.99	29.45	21.70	6.04	15361.48	1
138.12323	171.5440369	33.42080688	151.2725675	6.283452536	107100.9778	-0.43355757	0.279650837	0.713208407	-0.031226568	0.11159855	-22.1084099	-0.805297852	0.697509766	1.502807617	-0.044857047	0.310773334	-31.75878906	985.9393921	1122.304688	136.3652954	1056.961346	35.34982965	748328.6332	0.422508448	0.57637912	0.153870672	0.502606181	0.032132508	355.8451762	16.75	31.83	15.08	24.76	3.52	17527.60	1
51.87553406	126.7809906	74.90545654	88.59651969	16.88630109	62637.73942	-0.566581607	1.000603199	1.567184806	-0.021602338	0.242157984	-15.2728531	-1.319030762	1.657897949	2.976928711	-0.065601138	0.368847804	-46.38000488	993.8262939	1114.567871	120.7415771	1053.968377	27.58076846	745155.6426	0.409782171	0.595466137	0.185683966	0.494951514	0.041925428	349.9307205	13.71	31.10	17.39	20.86	4.65	14751.54	1
106.4326859	134.1098785	27.67719269	117.6625042	5.522021976	83069.72795	-0.273855597	0.391706288	0.665561885	0.022763772	0.10690423	16.07122273	-0.886657715	0.928588867	1.815246582	0.044219452	0.314738512	31.21893311	974.8614502	1100.801514	125.9400635	1038.829392	33.34113871	733413.5507	0.305964202	0.613869667	0.307905465	0.49005067	0.070077303	345.9757733	15.74	32.20	16.46	23.54	3.06	16622.72	1
0.001098857	359.9711304	359.9700315	199.8763953	167.1626607	140912.8587	-0.626632154	0.359367847	0.986000001	-0.121544402	0.172940376	-85.68880356	-0.993530273	0.701660156	1.69519043	-0.118046321	0.312410128	-83.22265625	1122.661133	1256.662354	134.0012207	1193.182843	34.74314566	841193.9042	0.459466606	0.591537535	0.132070929	0.514157042	0.030339526	362.4807149	14.20	30.96	16.77	24.16	3.20	17032.58	1
115.4191513	211.6348114	96.2156601	160.4125085	26.49914106	113411.6435	-0.607304156	0.230104506	0.837408662	-0.148189373	0.122243884	-104.7698868	-0.761230469	0.465332031	1.2265625	-0.154221941	0.205879299	-109.0349121	1009.472473	1089.609375	80.13690186	1054.608121	22.01888748	745607.9419	0.427381217	0.636001587	0.208620369	0.530616812	0.04447325	375.1460864	9.11	23.05	13.94	17.06	2.55	12062.47	1
48.29861069	128.228363	79.92975235	96.79135547	19.57519815	68721.86238	-0.581813037	0.405911386	0.987724423	-0.083954535	0.192197145	-59.60771968	-0.910888672	0.564208984	1.475097656	-0.075123446	0.311844651	-53.33764648	1107.196655	1203.005127	95.80847168	1159.57418	27.16687177	823297.6676	0.434371561	0.604720533	0.170348972	0.529220787	0.035346602	375.7467585	14.40	29.88	15.49	20.32	4.22	14428.81	1
155.0667419	218.9264679	63.85972595	179.3991137	11.76278072	125938.1778	-0.691297829	0.205107436	0.896405265	-0.128524111	0.143050715	-90.22392579	-1.09765625	0.789306641	1.886962891	-0.138910973	0.393345117	-97.51550293	1194.119507	1310.454468	116.3349609	1253.117524	27.23774103	879688.5021	0.393583685	0.636054516	0.242470831	0.53382448	0.059230656	374.7447853	13.97	30.64	16.67	21.44	4.51	15048.02	1
86.06207275	153.6954803	67.63340759	119.3237571	18.45470777	84361.89628	-0.666351497	0.303588599	0.969940096	-0.094346343	0.159002805	-66.70286431	-1.220336914	0.64465332	1.864990234	-0.107572607	0.286402132	-76.05383301	1191.584351	1280.973877	89.38952637	1238.930604	20.83305085	875923.9373	0.345115125	0.625495255	0.28038013	0.514341587	0.072004018	363.6395021	11.49	26.00	14.51	17.12	3.43	12103.85	1
113.226326	166.7201691	53.49384308	145.4245885	15.48389972	102524.3349	-0.666042805	0.448308498	1.114351302	-0.08943421	0.2012521	-63.05111831	-1.088256836	0.726074219	1.814331055	0.003185775	0.316492987	2.24597168	1113.226563	1238.579834	125.3532715	1187.650627	30.31354659	837293.6918	0.461738586	0.622713208	0.160974622	0.548546764	0.038931462	386.7254688	12.07	30.89	18.82	21.90	4.55	15438.03	1
274.660614	350.2249146	75.56430054	309.0756641	17.08211112	218207.4189	-0.670226634	0.517888427	1.18811506	-0.120053415	0.232249435	-84.75771072	-1.246459961	0.904174805	2.150634766	-0.135489402	0.424735123	-95.65551758	1204.190918	1317.74646	113.555542	1263.601629	27.49400754	892102.7498	0.413991541	0.686615169	0.272623628	0.533482514	0.054457621	376.6386546	10.78	32.81	22.03	22.84	5.35	16126.60	1
284.1500854	333.7305908	49.58050537	307.6812516	11.69303161	215376.8761	-0.507700503	0.590004385	1.097704887	-0.070715634	0.188817898	-49.50094366	-1.128540039	0.930297852	2.058837891	-0.090829032	0.350932156	-63.58032227	1185.864502	1311.799683	125.9351807	1248.489425	30.23133673	873942.5972	0.410592556	0.631222248	0.220629692	0.52147877	0.042565951	365.035139	17.54	31.21	13.67	23.49	3.30	16441.51	1
168.9878693	253.4087372	84.42086792	199.2654062	12.76033402	140681.3768	-0.989604652	0.375459641	1.365064293	-0.123848098	0.200924047	-87.43675747	-1.583129883	0.632568359	2.215698242	-0.185533043	0.346650407	-130.9863281	1197.824219	1319.850586	122.0263672	1258.518841	27.65594852	888514.3016	0.406883806	0.654335678	0.247451872	0.515571133	0.056605955	363.9932198	11.81	31.26	19.45	21.29	3.88	15028.15	1
136.8659515	228.644043	91.77809143	160.1943855	10.69929341	113097.2362	-1.387160063	0.615760207	2.00292027	-0.076926079	0.217497044	-54.30981173	-1.944213867	1.069824219	3.014038086	-0.058346151	0.497336708	-41.19238281	1202.911011	1325.102661	122.1916504	1268.265056	31.41575567	895395.1295	0.375606358	0.674913943	0.299307585	0.547449621	0.053787502	386.4994324	3.79	31.81	28.02	22.84	4.75	16127.39	1
132.8194122	176.6035767	43.78416443	147.5029106	8.351124663	104284.5578	-0.370495498	0.643705428	1.014200926	0.077134773	0.164899726	54.53428468	-0.94543457	1.141845703	2.087280273	0.186523265	0.417561892	131.8719482	1196.548828	1328.537109	131.9882813	1268.089976	35.46200287	896539.6132	0.44272083	0.720460773	0.277739942	0.541682533	0.065415231	382.9695511	5.17	32.40	27.23	24.85	5.03	17571.03	1
107.2832108	136.8066864	29.52347565	125.0234233	5.271984284	88516.58371	-0.356926829	0.436192364	0.793119192	-0.001517923	0.124154687	-1.074689628	-1.08972168	1.191772461	2.281494141	-0.096355029	0.360204926	-68.21936035	1125.656006	1256.453857	130.7978516	1178.425141	33.1846812	834325	0.361679137	0.547896326	0.186217189	0.462959769	0.03862827	327.7755164	11.98	35.16	23.18	23.51	6.37	16645.79	1
231.3494568	291.76474	60.4152832	265.109732	11.86052263	186902.3611	-0.700844228	0.565553725	1.266397953	-0.074789668	0.228657151	-52.72671592	-1.385375977	1.201538086	2.586914063	0.005467538	0.442873139	3.854614258	1207.20874	1330.824585	123.6158447	1274.484557	32.72532338	898511.6125	0.419165373	0.697455466	0.278290093	0.525447137	0.055016806	370.4402314	6.17	31.26	25.09	23.34	4.34	16456.27	1
156.6059418	234.0340881	77.42814636	190.097037	10.31422767	134398.6051	-1.078772306	0.240602776	1.319375083	-0.089151608	0.22227867	-63.03018716	-1.583007813	1.123046875	2.706054688	0.000695473	0.502996092	0.491699219	1204.823975	1327.357056	122.5330811	1275.709259	31.15700681	901926.4462	0.447131366	0.760773957	0.313642591	0.57589532	0.061644065	407.1579915	3.54	31.96	28.43	22.25	5.13	15730.34	1
11.10439587	96.52159882	85.41720295	58.97901942	19.40842961	41639.18771	-0.705096066	0.48556596	1.190662026	-0.027255587	0.229763398	-19.24244448	-1.087768555	0.933959961	2.021728516	0.054693552	0.393129723	38.61364746	1068.061279	1133.001587	64.94030762	1108.069019	16.73305926	782296.7274	0.386070132	0.742034256	0.355964124	0.581888647	0.078353673	410.8133848	4.21	25.85	21.64	12.50	5.59	8822.18	1
14.08712769	64.74570465	50.65857697	37.74298817	11.10125213	26533.32068	-0.467527449	0.518030703	0.985558152	0.012730025	0.174215146	8.949207437	-0.824584961	0.979492188	1.804077148	0.004208561	0.36131512	2.958618164	1007.246704	1113.424805	106.1781006	1060.042404	26.87181375	745209.8098	0.450168818	0.575829983	0.125661165	0.513569701	0.026129646	361.0394997	13.69	28.95	15.26	20.27	3.57	14248.41	1
24.42681885	346.7648621	322.3380432	81.46216273	34.08004556	57267.9004	-1.601776481	0.561413467	2.163189948	-0.03857106	0.285366846	-27.11545512	-2.149902344	1.142944336	3.29284668	-0.131568876	0.5713024	-92.49291992	975.8444214	1093.420898	117.5764771	1030.23551	33.75295389	724255.5638	0.330495566	0.761554539	0.431058973	0.513581518	0.118319067	361.0478074	1.51	36.11	34.60	23.38	6.35	16437.75	1
5.13699007	293.7545776	288.6175876	79.70847924	23.86595118	56353.89482	-2.030469179	0.494857192	2.525326371	-0.017035757	0.2355187	-12.04427994	-2.600158691	1.117553711	3.717712402	-0.024775698	0.637378853	-17.51641846	964.2509766	1090.583618	126.3326416	1029.724813	38.2208738	728015.4429	0.343286872	0.776609778	0.433322906	0.520670943	0.113088664	368.1143567	1.26	33.98	32.72	24.42	7.69	17261.77	1
182.5616913	281.8006287	99.23893738	228.9250746	30.30201442	160705.4023	-0.901115477	0.4877083	1.388823777	-0.158040977	0.246185145	-110.9447658	-1.277832031	1.049804688	2.327636719	-0.115923238	0.329010807	-81.37811279	1003.792908	1105.266113	101.4732056	1066.657908	24.26638845	748793.8513	0.403375685	0.622883081	0.219507396	0.539803395	0.037872649	378.9419832	12.92	28.88	15.96	19.85	3.66	13931.48	1
231.30867	309.5437622	78.23509216	265.5699446	19.54415832	186961.241	-0.882571876	0.758356512	1.640928388	-0.042554973	0.311620783	-29.95870126	-1.070617676	0.811340332	1.881958008	-0.005879315	0.409430361	-4.139038086	951.0723267	1062.348511	111.2761841	1018.332577	29.21105228	716906.1339	0.376652926	0.663893402	0.287240475	0.548430548	0.052613165	386.0951056	13.30	29.42	16.12	22.04	4.51	15517.02	1
2.504484177	359.4077148	356.9032307	156.4143559	47.21854865	110584.9496	-1.724384546	0.892005324	2.616389871	-0.03855165	0.274834907	-27.25601668	-2.101074219	1.142944336	3.244018555	-0.155261697	0.587604933	-109.7700195	1036.771973	1125.755981	88.98400879	1078.096573	24.99213972	762214.2773	0.33065629	0.603063226	0.272406936	0.473472029	0.068101293	334.7447248	0.37	27.82	27.44	18.57	4.91	13130.83	1
92.33281708	246.3272858	153.9944687	117.2855158	16.99144055	83155.4307	-1.021508932	0.402667671	1.424176604	-0.08738013	0.163952186	-61.95251248	-1.171386719	0.818603516	1.989990234	-0.119904382	0.380776526	-85.01220703	1028.682495	1121.311157	92.62866211	1075.207342	25.7895679	762322.0054	0.319119215	0.696531296	0.377412081	0.493197867	0.089491627	349.6772875	1.47	25.77	24.30	18.56	4.71	13156.51	1
91.08224487	214.2230682	123.1408234	139.716708	31.60061446	98919.42924	-1.341420889	0.295877218	1.637298107	-0.213107462	0.260472511	-150.8800829	-1.845336914	0.711791992	2.557128906	-0.160829533	0.401201995	-113.8673096	1037.933594	1135.691284	97.75769043	1094.897824	22.75163801	775187.6593	0.453456074	0.645088792	0.191632718	0.565477255	0.039849762	400.3578968	9.89	26.68	16.80	18.03	3.01	12765.93	1
77.66148376	214.2949829	136.6334991	108.7786137	36.80348017	76797.7013	-1.096641064	0.368549466	1.46519053	-0.199377215	0.251230614	-140.7603136	-1.18359375	0.836181641	2.019775391	-0.206840277	0.450153046	-146.0292358	1007.863281	1102.273682	94.41040039	1059.363659	24.78767819	747910.7436	0.419087052	0.691974521	0.272887468	0.549611277	0.053515203	388.0255613	6.72	30.06	23.35	18.44	4.90	13022.16	1
210.8489227	247.2167358	36.36781311	231.5787767	5.070568753	163031.4588	-0.286832571	0.147529706	0.434362277	-0.039698325	0.090260923	-27.94762075	-0.997436523	0.857177734	1.854614258	-0.052236037	0.375302049	-36.77416992	1105.967163	1223.03125	117.0640869	1160.431296	35.58971601	816943.6323	0.256208956	0.717240989	0.461032033	0.476104591	0.118681249	335.1776319	5.12	31.27	26.16	23.15	6.76	16301.05	1
1.606714487	43.41017914	41.80346465	24.95374884	10.07620155	17642.30043	-0.644753218	0.928488374	1.573241591	-0.063151877	0.268354811	-44.64837674	-1.127197266	1.143005371	2.270202637	-0.003207842	0.362552403	-2.267944336	968.0227661	1111.363159	143.3403931	1047.586605	37.67956254	740643.7297	0.319343299	0.659214914	0.339871615	0.532485641	0.07375283	376.4673481	15.11	31.22	16.11	26.45	3.47	18700.27	1
0.033721089	359.1020203	359.0682992	44.02645463	59.00986513	30906.57115	-0.664149821	0.61532259	1.279472411	-0.057206372	0.192607177	-40.15887343	-0.844238281	0.909057617	1.753295898	0.016685551	0.259477895	11.71325684	1038.161743	1152.583618	114.421875	1102.783777	28.62893395	774154.2118	0.415948898	0.5946666	0.178717703	0.538196675	0.035871595	377.8140659	15.49	31.14	15.65	22.03	3.77	15462.12	1
229.4694824	246.9485626	17.4790802	239.9562093	2.885480869	169169.1276	-0.384095401	0.544688463	0.928783864	0.001863896	0.11653225	1.314046585	-0.584960938	0.785583496	1.370544434	0.055163747	0.223202926	38.89044189	982.9329224	1132.966431	150.0335083	1062.226282	38.75132351	748869.5289	0.416761011	0.569609404	0.152848393	0.514368616	0.026341357	362.6298744	21.96	32.78	10.82	27.23	2.47	19195.06	1
227.3314667	259.401825	32.07035828	243.9462434	10.08820773	171006.3167	-0.557244897	0.363411695	0.920656592	-0.048667703	0.17618035	-34.11605975	-0.872436523	0.662841797	1.53527832	-0.021510234	0.27363927	-15.07867432	983.9946289	1125.43042	141.435791	1060.066713	37.60899769	743106.7661	0.467030883	0.588862062	0.121831179	0.520716051	0.024974545	365.021952	21.08	31.14	10.05	26.30	2.59	18437.63	1
187.3243408	258.8835144	71.55917358	220.3136434	20.54099354	155100.8049	-0.927497208	0.254216701	1.181713909	-0.179022943	0.180120534	-126.0321521	-1.118041992	0.778930664	1.896972656	-0.116008152	0.30645847	-81.66973877	1016.461304	1145.784912	129.3236084	1096.033832	31.65982461	771607.8177	0.442241281	0.651755691	0.209514409	0.552003585	0.045110622	388.6105241	14.84	32.41	17.57	23.68	4.53	16671.49	1
28.93179703	84.10418701	55.17238998	56.51370412	14.66299665	39672.62029	-0.552204549	0.978697538	1.530902088	-0.03680466	0.213270598	-25.83687153	-0.830566406	1.339111328	2.169677734	0.024602906	0.323972428	17.27124023	1041.386963	1159.009033	117.6220703	1105.003224	30.16712595	775712.2634	0.474803358	0.588227212	0.113423854	0.537261322	0.020466566	377.1574481	18.14	31.75	13.60	23.33	3.45	16378.48	1
189.8850403	238.4795074	48.59446716	214.4457644	10.7549683	150969.8181	-0.354925245	0.253695518	0.608620763	-0.082223101	0.096608734	-57.88506341	-0.986694336	0.61315918	1.599853516	-0.073902477	0.243919276	-52.02734375	1075.875366	1177.516724	101.6413574	1128.162204	24.14374841	794226.1917	0.45358485	0.685023367	0.231438518	0.532974741	0.04698164	375.2142175	9.29	25.85	16.56	18.65	3.06	13128.78	1
184.1004639	269.1298523	85.02938843	216.7044128	20.39843514	152776.611	-0.725907803	0.216656327	0.94256413	-0.169204094	0.205220918	-119.2888863	-0.948486328	0.657348633	1.605834961	-0.056907102	0.325335565	-40.11950684	1063.706421	1186.444336	122.737915	1137.145143	28.87891019	801687.3259	0.435003906	0.639727652	0.204723746	0.571895159	0.036830516	403.186087	11.87	30.84	18.97	21.39	4.39	15081.94	1
203.0718384	258.7012024	55.62936401	235.7961492	12.98987825	166943.6736	-0.600746036	0.430578619	1.031324655	-0.111427526	0.221481351	-78.89068824	-0.881835938	0.926391602	1.808227539	-0.066112023	0.348717175	-46.80731201	978.5334473	1145.630981	167.0975342	1067.187847	45.10444714	755568.9957	0.411678642	0.641107202	0.22942856	0.524863858	0.054732503	371.6036117	21.69	37.36	15.67	30.58	3.35	21651.36	1
0.524436593	359.9930115	359.4685749	103.8687475	115.7794674	73435.20446	-0.902077377	0.322143584	1.224220961	-0.245522553	0.270420813	-173.5844452	-1.239624023	0.642944336	1.882568359	-0.208185479	0.399238949	-147.1871338	988.7775879	1141.526367	152.7487793	1072.784868	37.49339207	758458.9019	0.470011026	0.66414547	0.194134444	0.556856167	0.036682225	393.6973102	19.75	33.56	13.82	27.52	3.27	19460.01	1
0.170602933	357.5932617	357.4226588	53.00425044	29.80947241	37155.97956	-0.79350698	0.371307075	1.164814055	-0.044656055	0.227847424	-31.3038945	-0.934814453	0.912231445	1.847045898	-0.057507481	0.33592057	-40.31274414	1005.070679	1138.825806	133.755127	1071.210271	35.14080711	750918.4001	0.435746074	0.594897985	0.159151912	0.509135506	0.033807593	356.9039897	14.66	29.73	15.06	24.32	3.34	17045.43	1
82.9671402	123.7301331	40.76299286	99.23242454	8.739555143	69859.62688	-0.245470449	0.41457808	0.66004853	0.072047103	0.127387083	50.72116043	-0.73236084	0.540161133	1.272521973	-0.065321922	0.281714864	-45.9866333	895.5965576	997.5706177	101.9740601	934.3049269	27.85891128	657750.6685	0.130518705	0.496178597	0.365659893	0.383814446	0.08801413	270.20537	0.62	26.21	25.59	18.93	6.11	13328.66	1
0.14731513	359.694397	359.5470818	316.8473177	71.06575638	224011.0536	-0.766945541	0.850025892	1.616971433	0.004256146	0.249037306	3.00909512	-1.031738281	1.306884766	2.338623047	0.023998816	0.430694966	16.96716309	965.7298584	1067.909302	102.1794434	1012.14853	26.80043435	715589.0105	0.402264863	0.60639298	0.204128116	0.498429172	0.045194287	352.3894243	8.90	33.02	24.12	19.38	5.07	13704.74	1
250.8097992	344.099884	93.29008484	309.2797655	16.56920258	218660.7942	-0.791544974	0.567408323	1.358953297	-0.029228954	0.259815494	-20.66487019	-1.132141113	1.001464844	2.133605957	-0.08534217	0.482232381	-60.33691406	985.8182983	1087.181396	101.3630981	1032.236286	28.81295191	729791.0541	0.231990084	0.608634174	0.37664409	0.481283455	0.075830199	340.267403	1.74	32.26	30.52	20.05	6.90	14171.87	1
171.9904327	302.1434937	130.1530609	239.5278083	35.16201566	169346.1605	-1.0819484	0.050029516	1.131977916	-0.285035923	0.190837642	-201.5203973	-1.541625977	0.388793945	1.930419922	-0.282511796	0.326771852	-199.7358398	1106.116333	1208.888916	102.772583	1167.530261	24.32911122	825443.8944	0.486619949	0.652955174	0.166335225	0.562305791	0.031341473	397.5501945	14.63	27.75	13.12	20.13	2.94	14234.98	1
52.98111725	127.4544296	74.47331238	78.7832976	19.38101883	55305.87492	-0.675492644	0.311771601	0.987264246	-0.162913053	0.200690606	-114.3649635	-1.01574707	0.8046875	1.82043457	-0.133631519	0.333742635	-93.80932617	1089.272217	1220.217651	130.9454346	1159.584488	32.71801431	814028.3107	0.46669513	0.70738095	0.240685821	0.554796407	0.041250442	389.4670775	18.28	31.34	13.05	24.44	2.55	17154.39	1
0.145940274	359.9837952	359.8378549	100.3413615	137.7003439	70640.3185	-0.782821119	0.355608791	1.13842991	-0.144343982	0.207762823	-101.6181637	-1.415283203	0.588867188	2.004150391	-0.207756216	0.412620605	-146.260376	1101.058105	1219.674194	118.6160889	1157.497101	33.80661432	814877.9591	0.364123374	0.702752411	0.338629037	0.512573836	0.086051601	360.8519804	5.53	32.64	27.12	23.23	6.11	16353.84	1
77.62342072	110.9762421	33.35282135	94.51108846	10.58186841	66535.80627	-0.427729726	0.280590445	0.708320171	-0.065918295	0.116382425	-46.40647962	-0.857666016	0.739257813	1.596923828	-0.083092603	0.264624635	-58.49719238	958.8433838	1081.272461	122.4290771	1021.688358	32.44723983	719268.604	0.417792737	0.582613766	0.164821029	0.490480693	0.033988767	345.2984076	17.13	27.91	10.78	23.32	2.12	16419.27	1
277.2693176	343.1094666	65.84014893	305.0925329	14.13762372	213259.6805	-0.874852121	0.511640787	1.386492908	-0.078176396	0.227959777	-54.64530052	-1.212280273	0.957519531	2.169799805	-0.109729423	0.341741844	-76.7008667	939.6861572	1059.629517	119.9433594	998.9209974	30.78469977	698245.7772	0.317990541	0.59942311	0.281432569	0.493734977	0.049866835	345.1207488	16.21	29.05	12.84	22.90	2.86	16003.88	1
0.10083127	359.966217	359.8653858	322.5779726	20.56133621	227094.8927	-0.528650463	0.422883511	0.951533973	-0.056384648	0.220703718	-39.69479186	-0.998779297	1.011474609	2.010253906	-0.12760067	0.446743523	-89.83087158	977.6483154	1102.475464	124.8271484	1042.765705	28.75057509	734107.0562	0.379685074	0.606876373	0.227191299	0.497920015	0.061344709	350.5356902	13.35	35.19	21.85	23.05	5.31	16228.75	1
90.61911774	273.1594849	182.5403671	118.1468984	26.76144854	83529.85719	-1.254285336	0.425466329	1.679751664	-0.089757984	0.286616995	-63.45889493	-1.243286133	0.870239258	2.113525391	-0.226060751	0.469492946	-159.8249512	1004.222351	1129.259521	125.0371704	1057.386344	32.34445772	747572.145	0.357518792	0.599163532	0.24164474	0.470946877	0.046752005	332.959442	1.99	31.18	29.19	22.61	5.72	15986.89	1
165.6340179	286.3409729	120.706955	194.4550491	20.67934184	136312.9894	-1.018108487	0.276598424	1.294706911	-0.161707625	0.192180191	-113.3570454	-1.322753906	0.789550781	2.112304688	-0.199378956	0.367789458	-139.7646484	1078.144897	1191.775391	113.6304932	1135.726647	30.057847	796144.3799	0.460687906	0.604538441	0.143850535	0.526124817	0.027833196	368.813497	10.67	31.60	20.93	21.97	3.94	15398.20	1
111.126564	260.3519897	149.2254257	153.167741	44.92552039	108136.4252	-1.324568391	0.682108164	2.006676555	-0.049565403	0.395148412	-34.99317424	-1.670593262	1.118164063	2.788757324	-0.176469668	0.59132783	-124.5875854	985.1135864	1089.665161	104.5515747	1030.693716	23.24397989	727669.7632	0.3164123	0.600474179	0.284061879	0.467329072	0.044996553	329.9343247	7.46	29.34	21.88	20.07	4.61	14170.11	1
54.85300064	144.8698578	90.01685715	114.2959997	22.15849531	80235.7918	-0.692395687	0.299643815	0.992039502	-0.176245843	0.166612473	-123.7245817	-1.222900391	0.54284668	1.76574707	-0.274479967	0.286000581	-192.6849365	1149.379639	1261.8302	112.4505615	1201.958849	29.11700823	843775.1118	0.437396705	0.651238382	0.213841677	0.501271054	0.040379849	351.8922797	12.46	29.96	17.50	22.26	4.38	15625.14	1
0.010632995	359.9974976	359.9868646	230.9460416	154.0991638	163278.8514	-1.092165232	0.294377059	1.38654229	-0.20964085	0.253878284	-148.2160812	-1.61730957	1.030761719	2.648071289	-0.205101261	0.500295426	-145.0065918	1103.871216	1220.219482	116.3482666	1171.859346	25.85940214	828504.5576	0.412881643	0.67260766	0.259726018	0.534226026	0.068851605	377.6978007	6.48	33.05	26.57	19.84	6.62	14025.01	1
107.9891205	143.8374023	35.84828186	125.7206626	9.007676448	88758.78783	-0.640837669	0.343135446	0.983973116	-0.053999304	0.152821675	-38.12350879	-0.983886719	0.768798828	1.752685547	-0.08512364	0.300021992	-60.09729004	1158.464355	1276.834106	118.369751	1218.179626	26.58466011	860034.8163	0.378061295	0.63442713	0.256365836	0.504709365	0.064222887	356.3248118	13.64	31.55	17.91	20.31	3.79	14337.02	1
162.0912628	262.0185547	99.92729187	223.9417461	24.32890296	157878.931	-0.76567775	0.535442293	1.301120043	-0.181932237	0.191611719	-128.2622269	-1.469970703	0.928710938	2.398681641	-0.244360352	0.393768115	-172.2740479	1185.497437	1307.085449	121.5880127	1238.940331	30.30345055	873452.9333	0.390199661	0.675494492	0.285294831	0.517829969	0.074950379	365.0701282	12.63	34.05	21.41	22.82	6.13	16084.78	1
10.58940983	73.03952789	62.45011806	42.1936008	13.57348833	29830.87577	-0.525907695	0.612605393	1.138513088	-0.006072775	0.213021897	-4.293451876	-1.118652344	1.099609375	2.218261719	0.002673115	0.383580912	1.889892578	1127.566772	1223.034912	95.46813965	1177.692993	24.31125131	832628.9458	0.357385695	0.606862009	0.249476314	0.492679643	0.058462494	348.3245079	10.31	29.11	18.80	19.14	3.80	13533.16	1
0.57941407	354.5401611	353.9607471	22.65273754	28.51960027	15811.61081	-0.669496357	0.612097323	1.28159368	-0.034108342	0.195563907	-23.80762257	-1.353515625	1.070556641	2.424072266	-0.160713961	0.335289725	-112.1783447	1159.467773	1290.036865	130.5690918	1214.714273	32.14621254	847870.5625	0.35616377	0.646067858	0.289904088	0.462899765	0.054693532	323.1040363	9.72	33.05	23.33	23.10	4.66	16126.50	1
0.01216821	359.9980774	359.9859092	167.8936091	162.9530642	118868.6753	-0.619131327	0.489670277	1.108801603	-0.126200903	0.203725365	-89.35023917	-1.026123047	0.958007813	1.984130859	-0.162765934	0.321203012	-115.2382813	1150.009888	1252.007568	101.9976807	1202.398769	24.33849616	851298.3285	0.411462814	0.621676981	0.210214168	0.508701271	0.044998057	360.1604997	12.24	28.04	15.80	19.21	3.45	13601.82	1
0.029166784	359.9612427	359.9320759	134.4785445	162.8262516	95076.33099	-0.518846691	0.543284595	1.062131286	-0.022834644	0.180216123	-16.144093	-0.771606445	0.930297852	1.701904297	-0.025676895	0.285204685	-18.15356445	1146.968506	1237.627441	90.65893555	1191.227977	22.03155965	842198.1801	0.381027579	0.614483893	0.233456314	0.496177666	0.053215068	350.79761	11.54	24.44	12.90	17.46	3.22	12342.94	1
130.2538452	184.9421692	54.68832397	149.8743247	11.87762014	105211.776	-0.487222105	0.294520259	0.781742364	-0.08365023	0.139727183	-58.72246126	-1.068359375	1.194335938	2.262695313	-0.177137587	0.33193586	-124.3505859	1196.843384	1314.223389	117.3800049	1246.083772	29.81990314	874750.8082	0.364868939	0.680807352	0.315938413	0.487529492	0.07816871	342.2457037	10.42	31.81	21.38	21.46	5.85	15061.47	1
156.0897369	220.7588501	64.66911316	183.9499035	12.68832686	130236.5317	-0.706896186	0.489567816	1.196464002	-0.034233561	0.21360743	-24.23736113	-1.013671875	0.741333008	1.755004883	-0.090593758	0.338528876	-64.14038086	1138.585327	1239.188965	100.6036377	1186.775427	25.44144958	840237.0023	0.400944889	0.631916404	0.230971515	0.485462442	0.050401588	343.7074088	12.75	31.54	18.79	20.28	4.21	14355.90	1
0.190280691	359.9009705	359.7106898	287.0323579	110.4417767	202644.8446	-0.588820398	0.272554994	0.861375391	-0.107514939	0.155542123	-75.9055468	-1.007446289	1.182617188	2.190063477	-0.026509315	0.444074204	-18.71557617	1175.035645	1269.570923	94.53527832	1232.710096	28.69090128	870293.3281	0.215876162	0.788685679	0.572809517	0.55823181	0.112004418	394.1116578	3.49	33.00	29.51	18.77	8.57	13254.32	1
0.011461926	359.9974365	359.9859746	75.3419061	130.6406476	52965.35998	-0.463752776	0.500311375	0.964064151	-0.064903696	0.157157547	-45.62729809	-0.5234375	0.724731445	1.248168945	-0.139589399	0.220250959	-98.13134766	1170.646118	1288.964355	118.3182373	1224.642814	29.42921654	860923.8983	0.408905059	0.61652416	0.207619101	0.492367622	0.048325389	346.1344386	14.64	30.46	15.82	22.19	4.11	15601.17	1
257.4914856	298.2731018	40.78161621	278.1331546	9.717766798	196640.1403	-0.485671818	0.4258807	0.911552519	0.002687749	0.167767974	1.90023871	-1.005004883	0.76940918	1.774414063	-0.037839034	0.327737228	-26.75219727	1150.450684	1260.300415	109.8497314	1204.246502	26.81525166	851402.2772	0.356595278	0.58707267	0.230477393	0.490420151	0.054552194	346.7270467	13.88	31.54	17.66	21.04	3.66	14877.35	1
153.2726898	255.5039368	102.2312469	214.5490086	18.61089338	151686.1491	-0.679308772	0.565748572	1.245057344	-0.045840003	0.259137641	-32.40888184	-1.17565918	0.966308594	2.141967773	-0.01822249	0.39972447	-12.88330078	1139.381714	1235.46106	96.0793457	1190.079976	24.89419681	841386.5427	0.388281941	0.711983502	0.32370156	0.545876167	0.058402216	385.93445	7.66	22.97	15.30	17.86	2.69	12628.03	1
42.50465775	94.85475159	52.35009384	68.87735497	13.96310089	48834.04467	-0.731881857	0.634532571	1.366414428	-0.043088674	0.257330765	-30.54987013	-1.366699219	1.127441406	2.494140625	-0.02889623	0.486964522	-20.48742676	1208.63147	1322.284912	113.6534424	1265.097585	29.28952334	896954.1877	0.353424311	0.739831507	0.386407197	0.528044582	0.091936233	374.3836086	9.59	34.04	24.45	22.19	5.02	15731.52	1
136.3212891	205.5788269	69.25753784	180.437723	14.62295246	127028.157	-1.200285792	0.518960357	1.719246149	-0.124339777	0.266164533	-87.535203	-1.822265625	0.728149414	2.550415039	-0.234513369	0.41089391	-165.0974121	1170.501099	1294.910522	124.4094238	1228.265925	28.84652006	864699.2112	0.377047062	0.579102218	0.202055156	0.492966861	0.045277674	347.0486701	13.42	35.05	21.63	22.73	5.19	16000.11	1
40.98356247	125.6621094	84.67854691	77.58042614	16.73462405	54694.20043	-0.807217777	0.462461829	1.269679606	-0.158193886	0.205650061	-111.5266898	-1.158813477	1.087158203	2.24597168	-0.262546577	0.390476038	-185.0953369	1183.599976	1304.658813	121.0588379	1240.885194	29.38584462	874824.0618	0.351344585	0.681304812	0.329960227	0.506997684	0.069548967	357.433367	13.49	38.33	24.84	23.18	5.94	16345.12	1
52.31820297	80.03668213	27.71847916	65.77448711	5.608010666	46436.7879	-0.468052834	0.344560087	0.812612921	0.008663194	0.112009139	6.116214639	-0.917480469	0.671264648	1.588745117	-0.103997163	0.301297391	-73.42199707	1162.764648	1302.687866	139.9232178	1223.863367	32.85716355	864047.5371	0.366576642	0.573440254	0.206863612	0.465384516	0.046505011	328.5614681	15.58	36.41	20.84	24.18	5.24	17073.70	1
154.3566132	225.405838	71.04922485	201.5303243	18.25984647	142481.9393	-0.742129862	0.561277688	1.30340755	-0.109742104	0.260183387	-77.58766787	-1.194213867	1.094970703	2.28918457	-0.237186761	0.410850279	-167.69104	1181.505249	1305.634521	124.1292725	1230.88071	29.3621064	870232.662	0.36095354	0.622196317	0.261242777	0.479671116	0.061848621	339.1274788	11.52	35.01	23.48	21.77	6.49	15394.30	1
0.402854472	359.9028015	359.499947	276.9076576	135.0471237	195773.7139	-0.683423877	0.207431778	0.890855655	-0.124532723	0.161313581	-88.04463548	-0.973510742	0.669433594	1.642944336	-0.107745957	0.300572609	-76.1763916	1201.897583	1293.362671	91.46508789	1251.344396	23.45364384	884700.4879	0.425171018	0.615468979	0.190297961	0.513752371	0.044628214	363.2229263	10.97	24.53	13.56	17.72	2.97	12529.52	1
108.9283066	167.3148193	58.38651276	131.8993484	14.55323785	93252.83935	-0.542063355	0.431225806	0.973289162	-0.098917223	0.174947457	-69.93447685	-1.159912109	1.340454102	2.500366211	-0.12523309	0.467989347	-88.53979492	1217.57666	1326.34314	108.7664795	1266.962049	29.17518991	895742.1689	0.365534246	0.764338791	0.398804545	0.519662323	0.094222064	367.4012626	10.14	32.95	22.81	21.76	6.11	15381.83	1
132.6811066	170.0334625	37.35235596	151.9139592	7.284261439	107403.1691	-0.361459643	0.41511181	0.776571453	-0.019117065	0.140440624	-13.51576481	-0.982421875	0.842163086	1.824584961	-0.06835713	0.298240764	-48.32849121	1181.496094	1310.90979	129.4136963	1245.942067	32.24258345	880881.0415	0.404188842	0.569211841	0.165022999	0.491135389	0.035840214	347.2327203	18.86	32.38	13.52	23.88	3.01	16880.28	1
236.7929535	301.3144531	64.52149963	258.9818548	12.23332088	183100.1713	-0.551261425	0.406477571	0.957738996	-0.075464762	0.170348931	-53.35358703	-0.986938477	0.782836914	1.769775391	-0.080056025	0.316963601	-56.59960938	1204.682983	1320.727783	116.0447998	1262.86157	29.23235282	892843.1299	0.413664967	0.719929814	0.306264848	0.520497877	0.052867214	367.9919993	15.62	29.72	14.09	22.47	3.19	15889.42	1
0.026981544	359.7999878	359.7730062	66.58280221	115.3676674	46940.87556	-0.897163033	0.548164248	1.445327282	-0.097701968	0.272657913	-68.87988773	-1.068115234	0.830444336	1.89855957	-0.113606251	0.377869241	-80.09240723	1172.117432	1259.936157	87.81872559	1217.819594	22.89825466	858562.8135	0.404243946	0.600980878	0.196736932	0.504291442	0.046036094	355.5254666	10.25	23.29	13.04	17.26	2.93	12167.94	1
111.7187653	173.4744415	61.75567627	141.8593397	11.82396641	100010.8345	-0.677231193	0.498613536	1.175844729	-0.106217286	0.210188808	-74.88318658	-0.933105469	1.179321289	2.112426758	-0.13665936	0.38349224	-96.34484863	1188.472046	1306.72937	118.2573242	1244.78257	30.56314995	877571.7122	0.407788128	0.586883426	0.179095298	0.500535574	0.037046614	352.87758	15.57	33.05	17.48	23.02	4.40	16230.39	1
0.073989913	359.9486389	359.874649	77.62440994	125.475455	54880.45782	-0.834240258	0.367010713	1.20125097	-0.105525394	0.192777657	-74.60645335	-0.879882813	0.537475586	1.417358398	-0.09420703	0.257171688	-66.60437012	1117.653564	1231.480103	113.8265381	1178.690606	28.86999242	833334.2585	0.429331899	0.614935577	0.185603678	0.516675061	0.031739322	365.289268	16.02	26.39	10.37	21.65	1.96	15303.45	1
25.97332191	115.8343353	89.86101341	54.19509659	15.00084784	38261.73819	-1.029805064	0.299838752	1.329643816	-0.125389127	0.246020305	-88.52472349	-1.373657227	0.576416016	1.950073242	-0.284767734	0.402773345	-201.0460205	1166.887695	1263.010132	96.12243652	1211.185512	23.90096746	855096.9718	0.387551606	0.575698078	0.188146472	0.473764322	0.037344578	334.4776112	10.37	31.69	21.32	19.26	4.91	13600.54	1
5.467042446	38.58423996	33.11719751	26.82394835	6.300061932	18857.23569	-0.599464953	0.373311073	0.972776026	-0.040728271	0.147476379	-28.63197479	-1.291015625	0.808105469	2.099121094	-0.082104874	0.296857604	-57.71972656	1108.972778	1231.420044	122.4472656	1168.822862	29.51477503	821682.472	0.390331417	0.597457528	0.207126111	0.484866316	0.046107556	340.8610199	16.75	31.24	14.49	22.12	2.56	15553.78	1
172.3685913	218.2471924	45.87860107	199.0757266	10.79757886	140547.463	-0.675354064	0.558852017	1.23420608	-0.086610903	0.19929572	-61.1472974	-0.975952148	1.107543945	2.083496094	-0.153924612	0.328105369	-108.6707764	1160.582764	1276.184082	115.6013184	1217.139472	29.24794435	859300.4669	0.363976449	0.582512915	0.218536466	0.492776455	0.044799315	347.9001773	15.09	32.58	17.49	22.26	4.07	15717.00	1
121.5270615	186.0058441	64.47878265	152.5222455	12.85931877	107680.7053	-0.426463008	0.641409099	1.067872107	0.050281383	0.154735635	35.49865621	-0.916259766	1.08203125	1.998291016	0.039740111	0.282835171	28.05651855	1150.136475	1258.267822	108.1313477	1200.709298	26.12962393	847700.7643	0.385605484	0.635941863	0.250336379	0.481267011	0.044867994	339.7745098	12.59	29.27	16.68	20.12	3.82	14206.33	1
112.7694168	234.9200745	122.1506577	142.0938086	28.49429079	100460.3227	-0.841149569	0.245913386	1.087062955	-0.127185131	0.202717434	-89.91988751	-1.15246582	0.814208984	1.966674805	-0.210840465	0.402666891	-149.064209	1150.168823	1265.537354	115.3685303	1200.559267	29.40582897	848795.4019	0.386774898	0.650049686	0.263274789	0.492690883	0.067295861	348.3324546	7.53	34.12	26.59	21.02	6.80	14861.88	1
2.173048496	359.8910217	357.7179732	318.5474179	35.62356422	222983.1926	-1.052902937	0.501049757	1.553952694	-0.120446528	0.289496697	-84.31256985	-1.581420898	1.005737305	2.587158203	-0.053322056	0.400842972	-37.32543945	1034.605225	1149.137939	114.5327148	1104.432212	26.35693232	773102.5482	0.420881808	0.663303196	0.242421389	0.555504617	0.066093539	388.8532318	10.69	32.06	21.37	20.00	5.44	13997.13	1
179.2527466	220.7529602	41.50021362	207.1748967	9.573834061	146058.3022	-0.443503737	0.691869438	1.135373175	-0.052764608	0.152643583	-37.19904855	-0.668457031	0.876342773	1.544799805	0.002702169	0.263712602	1.905029297	1190.999756	1314.344482	123.3447266	1257.13176	32.86215242	886277.8906	0.415173978	0.723117769	0.307943791	0.549403457	0.068161028	387.3294368	14.16	32.14	17.99	23.07	3.72	16267.05	1
0.037758473	359.7120667	359.6743082	304.9473171	74.54902281	214073.0166	-0.716249228	0.692537367	1.408786595	-0.087823577	0.235883835	-61.65215135	-0.937988281	0.952026367	1.890014648	-0.121023499	0.307996253	-84.95849609	1070.532715	1152.195679	81.66296387	1110.08942	21.4724447	779282.7727	0.421472847	0.676500857	0.255028009	0.502880324	0.039675558	353.0219871	10.25	25.58	15.33	17.36	3.46	12189.77	1
0.480475932	359.684021	359.2035451	143.9277878	145.3306411	101613.0182	-1.441684127	0.576469004	2.018153131	-0.206189116	0.358563632	-145.5695156	-1.834899902	1.09765625	2.932556152	-0.232654345	0.544156432	-164.2539673	982.437439	1081.895142	99.45770264	1039.866268	27.37353054	734145.585	0.405227304	0.650089025	0.244861722	0.529975324	0.046964785	374.1625786	11.36	32.64	21.28	20.97	4.43	14802.73	1
46.15200043	138.5446625	92.39266205	82.66118374	22.77686808	58110.81217	-0.779559195	0.156930745	0.93648994	-0.181577319	0.163710318	-127.648855	-0.989379883	0.689941406	1.679321289	-0.168403723	0.286828522	-118.3878174	1093.757935	1199.599854	105.8419189	1156.995933	25.21821554	813368.1406	0.370690167	0.652555466	0.281865299	0.540891587	0.066902701	380.2467857	11.14	28.99	17.85	19.65	4.31	13815.37	1
0.586897433	359.5023499	358.9154524	67.42840138	97.49974291	47671.87977	-1.262170672	0.326618612	1.588789284	-0.202073468	0.274093021	-142.865942	-1.460205078	0.888671875	2.348876953	-0.146691912	0.419023774	-103.7111816	1093.743774	1195.463623	101.7198486	1156.65674	25.75181559	817756.3153	0.402963787	0.695572972	0.292609185	0.550649632	0.059594279	389.3092898	6.64	28.28	21.64	19.28	4.44	13632.80	1
0.223313734	359.8771667	359.653853	328.5168479	36.92400147	230947.3441	-0.469187945	0.302392036	0.771579981	-0.091044594	0.142063533	-64.00434953	-0.724487305	1.153198242	1.877685547	-0.032085218	0.382720681	-22.5559082	1166.649292	1289.652466	123.0031738	1231.992198	35.64593258	866090.5155	0.387431175	0.825178623	0.437747449	0.552277943	0.125466788	388.2513936	6.84	33.37	26.53	24.01	5.43	16879.80	1
307.8836365	337.6474915	29.76385498	322.2621415	7.876058663	226872.5476	-0.565800488	0.340190768	0.905991256	-0.02594067	0.141915916	-18.26223184	-0.765258789	0.51965332	1.284912109	-0.102369308	0.250084068	-72.06799316	1134.650146	1253.581055	118.9309082	1187.253816	29.56230022	835826.6863	0.386933535	0.640921712	0.253988177	0.481498499	0.061620277	338.9749435	13.60	30.81	17.20	22.03	4.96	15506.83	1
80.26284027	198.5243835	118.2615433	124.5679445	26.59039578	87072.99321	-0.603523552	0.588004112	1.191527665	-0.117251508	0.219427562	-81.9588038	-0.994506836	1.323120117	2.317626953	-0.158332355	0.378686687	-110.6743164	1179.702148	1280.056641	100.3544922	1231.023521	24.10824937	860485.4412	0.42207855	0.630526543	0.208447993	0.504862663	0.044978448	352.8990013	9.36	31.75	22.40	19.07	5.35	13329.58	1
88.01793671	244.8342743	156.8163376	139.39219	50.03219948	98410.88611	-1.159729004	0.684587479	1.844316483	-0.199735991	0.334802819	-141.0136099	-1.477539063	1.128173828	2.605712891	-0.270022471	0.528191275	-190.6358643	1055.860107	1139.499756	83.63964844	1101.362791	19.85182211	777562.1306	0.481025934	0.647153139	0.166127205	0.552227776	0.032214928	389.8728095	9.08	26.39	17.31	17.86	3.81	12607.41	1
0.016329292	359.0507813	359.034452	87.11685262	125.2925405	61591.61481	-0.798810363	0.519529462	1.318339825	-0.175718258	0.262885873	-124.2328088	-1.256958008	0.96472168	2.221679688	-0.176986586	0.366370372	-125.1295166	1069.044067	1178.655884	109.6118164	1131.304711	24.96363252	799832.431	0.430959433	0.638157904	0.207198471	0.548281859	0.058124807	387.6352742	12.60	28.20	15.60	19.66	3.88	13896.83	1
240.5363007	310.8337708	70.29747009	282.0543216	11.56504132	199130.3511	-0.551530421	0.619604349	1.17113477	-0.018784468	0.164792684	-13.26183444	-1.682922363	1.354736328	3.037658691	-0.048981405	0.477595218	-34.58087158	1020.641479	1140.409424	119.7679443	1081.915738	32.260418	763832.5111	0.414390206	0.595999599	0.181609392	0.506188909	0.04430342	357.3693698	7.44	30.97	23.53	22.08	5.55	15589.96	1
201.49617	301.9101868	100.4140167	227.3238934	21.05460312	160717.9926	-0.927412808	0.513853133	1.441265941	-0.136921811	0.257171722	-96.80372025	-1.395874023	1.060791016	2.456665039	-0.182420528	0.383102697	-128.9713135	1095.846313	1179.946045	84.09973145	1138.549049	20.11723205	804954.1779	0.403542191	0.647265375	0.243723184	0.522908858	0.065148655	369.6965625	11.04	25.17	14.13	16.31	3.01	11532.25	1
68.71755219	139.5615082	70.84395599	98.97877607	17.22063941	69977.99468	-0.785600901	0.883195519	1.66879642	-0.079921558	0.26147317	-56.50454124	-1.109375	1.472412109	2.581787109	-0.013849024	0.40006458	-9.791259766	1033.184326	1137.995605	104.8112793	1092.88266	27.34149804	772668.0409	0.428081244	0.622606099	0.194524854	0.546319756	0.033866232	386.2480673	13.53	30.16	16.63	20.83	4.12	14724.29	1
0.53508383	359.3787231	358.8436393	68.68910734	61.78517988	48494.50978	-1.441227317	0.777054369	2.218281686	-0.198171747	0.337419517	-139.9092532	-1.645141602	1.168457031	2.813598633	-0.171819844	0.456660774	-121.3048096	1038.27417	1133.581299	95.30712891	1095.301106	24.23383738	773282.5809	0.446107507	0.637972593	0.191865087	0.550995193	0.032636432	389.0026065	9.68	30.35	20.67	19.03	3.92	13431.82	1
0.219295397	359.9586182	359.7393228	38.63536579	53.89196136	27315.20361	-0.489770144	0.484955817	0.974725962	-0.064757383	0.194238572	-45.7834699	-0.889038086	0.704711914	1.59375	-0.095606781	0.295510196	-67.59399414	1092.404053	1182.8125	90.40844727	1138.033748	22.81171938	804589.86	0.395325452	0.61563307	0.220307618	0.498164624	0.049921211	352.2023889	11.38	24.22	12.84	17.54	2.46	12399.45	1
148.6147919	235.0421295	86.42733765	197.1356898	24.62437058	138586.3899	-0.644945979	0.450065464	1.095011443	-0.118682314	0.178373926	-83.43366662	-1.209228516	0.764282227	1.973510742	-0.128574247	0.35332601	-90.38769531	1103.065918	1189.720215	86.65429688	1148.648483	21.93325063	807499.8834	0.424374074	0.657124877	0.232750803	0.512596009	0.053278223	360.3549946	6.91	26.84	19.93	17.67	4.56	12424.55	1
183.8278198	238.5569916	54.72917175	204.1336804	11.49816614	143097.7099	-0.469319552	0.613286972	1.082606524	0.017220962	0.172983941	12.07189435	-1.288696289	1.141113281	2.42980957	-0.021447806	0.377025027	-15.03491211	1025.387329	1109.322754	83.9354248	1067.607056	23.06952119	748392.5461	0.36024192	0.604556978	0.244315058	0.474858935	0.064396324	332.8761134	1.26	23.26	22.00	17.18	3.46	12040.69	1
24.81807137	88.58219147	63.7641201	64.0986368	16.88481847	45253.63758	-0.773063958	0.300335944	1.073399901	-0.174241277	0.187389021	-123.0143414	-1.067016602	0.797607422	1.864624023	-0.243277142	0.329825913	-171.7536621	1150.119385	1295.916992	145.7976074	1223.77349	37.05999196	863984.0837	0.415651381	0.589392126	0.173740745	0.505777145	0.035700894	357.0786642	19.21	35.04	15.83	26.82	3.49	18935.20	1
65.91770935	135.5582581	69.64054871	110.712475	13.92876119	77609.44495	-0.796571374	0.165569261	0.962140635	-0.161034724	0.169208105	-112.8853412	-0.850219727	0.859130859	1.709350586	-0.082780563	0.348471241	-58.0291748	1196.248047	1323.778564	127.5305176	1273.220604	32.21981758	892527.6433	0.41255793	0.663643181	0.251085252	0.562549709	0.045539668	394.347346	9.92	29.58	19.66	22.43	5.61	15722.94	1
116.2485733	239.6997833	123.45121	146.0766623	16.41885408	103276.2002	-0.877605438	0.483739763	1.361345202	-0.082731691	0.244784091	-58.49130548	-1.324401855	1.015380859	2.339782715	-0.091950887	0.415322868	-65.00927734	978.7392578	1074.157837	95.4185791	1026.082516	26.79870104	725440.3389	0.26093328	0.62038368	0.3594504	0.487808233	0.089455916	344.8804211	2.51	25.54	23.03	18.65	4.26	13188.40	1
204.3749847	271.4345093	67.05952454	240.9589741	15.81451035	170117.0357	-0.772482514	0.877836347	1.650318861	-0.031665293	0.297848324	-22.35569686	-1.223022461	1.177368164	2.400390625	-0.089960028	0.430254117	-63.51177979	916.333313	1012.372192	96.03887939	962.0323084	25.1071327	679194.8098	0.252736062	0.543204546	0.290468484	0.468266843	0.066164527	330.5963914	9.70	28.97	19.28	19.56	3.30	13807.52	1
6.867177963	355.1228027	348.2556248	283.3768498	68.99470415	200064.056	-1.768262148	1.167248487	2.935510635	-0.016039798	0.312712663	-11.3240977	-2.153320313	1.358459473	3.511779785	-0.255968823	0.728009565	-180.7139893	979.8248901	1079.116089	99.29119873	1023.631464	27.88284376	722683.8136	0.372397602	0.595421612	0.223024011	0.479892117	0.055653442	338.8038344	0.50	31.09	30.59	20.65	6.03	14575.37	1
208.502594	252.690567	44.18797302	235.1254019	10.19777536	165293.1575	-0.705135226	0.682966948	1.388102174	-0.030354315	0.228415216	-21.33908324	-0.817016602	0.896240234	1.713256836	0.007800866	0.351982703	5.484008789	1175.35022	1304.822388	129.472168	1243.714151	29.97551109	874331.048	0.412985444	0.617953777	0.204968333	0.525213484	0.048611617	369.2250791	12.69	30.95	18.26	22.62	3.83	15905.25	1
122.7296753	156.1710968	33.44142151	138.1911816	8.166937342	97562.97417	-0.457199097	0.579121292	1.036320388	-0.022681151	0.145724738	-16.01289248	-0.729370117	1.000366211	1.729736328	-0.051008965	0.291896669	-36.0123291	1138.180664	1276.869751	138.6890869	1207.221913	33.7974309	852298.6704	0.412477553	0.565635204	0.153157651	0.501581462	0.031730241	354.1165124	17.67	32.06	14.39	24.64	3.25	17396.16	1
0.023068091	359.9989624	359.9758943	275.9766984	138.8805742	194563.5724	-0.941725314	0.666914582	1.608639896	-0.109768765	0.262967971	-77.38697962	-1.108520508	1.005371094	2.113891602	-0.160612845	0.424789261	-113.2320557	1125.871948	1280.871704	154.9997559	1205.079509	36.60562095	849581.054	0.427873254	0.630582869	0.202709615	0.514559139	0.039862434	362.7641931	20.10	38.09	17.99	27.08	3.52	19091.50	1
230.3271027	310.1525879	79.82548523	263.3511646	18.53228819	185399.2199	-0.981013358	0.419304132	1.40031749	-0.201688615	0.231329742	-141.9887849	-1.091674805	1.21105957	2.302734375	-0.130466808	0.474628	-91.84863281	1179.25647	1317.726563	138.4700928	1254.046513	36.34869191	882848.7451	0.446984142	0.708262086	0.261277944	0.560207106	0.049398757	394.3858027	10.00	34.46	24.46	25.90	4.20	18235.89	1
14.63090801	69.32648468	54.69557667	44.5256708	13.2112091	31257.0209	-0.771543503	0.624536335	1.396079838	-0.070691235	0.255078166	-49.62524676	-1.07800293	1.359741211	2.437744141	-0.05119302	0.467651765	-35.9375	1198.777588	1325.18811	126.4105225	1261.147263	33.14028297	885325.3789	0.391719162	0.659633875	0.267914712	0.518924624	0.063185425	364.2850861	13.26	34.47	21.21	23.91	5.03	16786.30	1
162.7893524	336.5081177	173.7187653	212.8579983	50.00818283	150277.7468	-1.195251703	0.447915494	1.643167198	-0.211161449	0.274727023	-149.0799827	-1.624816895	0.815307617	2.440124512	-0.347820422	0.443202057	-245.5612183	1018.922485	1107.565063	88.64257813	1060.95374	21.69652552	749033.3403	0.448312581	0.62829119	0.179978609	0.516915321	0.032087173	364.9422166	4.53	27.64	23.11	18.91	4.11	13350.36	1
5.583100796	359.7079773	354.1248765	153.505337	81.52458362	108374.7679	-1.197872877	0.213911355	1.411784232	-0.085141778	0.201969578	-60.11009494	-1.456604004	0.419250488	1.875854492	-0.355600676	0.425240865	-251.0540771	997.7411499	1081.983398	84.24224854	1027.434265	22.58234991	725368.5914	0.285319924	0.496725827	0.211405903	0.40303398	0.061840317	284.54199	0.67	29.32	28.65	19.20	6.09	13558.12	1
57.04283142	94.37860107	37.33576965	75.97200674	8.361022264	53636.23676	-0.33319661	0.228537008	0.561733618	-0.042572144	0.118099334	-30.05593359	-0.678955078	0.354614258	1.033569336	-0.178938306	0.183588663	-126.3304443	1077.01709	1186.565674	109.548584	1123.111373	28.89719299	792916.6293	0.215426236	0.501051188	0.285624951	0.4163901	0.067682382	293.9714105	6.73	29.47	22.74	21.11	4.75	14902.66	1
59.04288483	137.8224335	78.77954865	101.4990868	20.84682897	71252.35891	-1.056633472	0.705594003	1.762227476	-0.11056179	0.235110819	-77.61437644	-1.225830078	1.081176758	2.307006836	-0.111749285	0.438758163	-78.44799805	1028.835693	1132.026001	103.1903076	1087.005268	22.52503226	763077.6982	0.436766416	0.700711191	0.263944775	0.542231214	0.064638787	380.6463122	9.78	29.58	19.80	18.93	5.27	13289.73	1
1.666838288	79.18506622	77.51822793	47.8815627	13.06778135	33708.62014	-0.873425484	0.383760303	1.257185787	-0.111564133	0.182861214	-78.54114958	-1.252807617	0.62512207	1.877929688	-0.151257775	0.277988521	-106.4854736	1216.14978	1335.591187	119.4414063	1276.53009	31.19543362	898677.1836	0.444077164	0.613308549	0.169231385	0.510440893	0.036099009	359.3503888	16.64	31.31	14.67	22.61	2.66	15916.57	1
281.9408569	320.2748108	38.33395386	294.2096127	8.486838488	208006.1962	-0.646734834	0.184244826	0.83097966	-0.107725937	0.133812835	-76.16223771	-0.854736328	0.857421875	1.712158203	-0.04899077	0.311460331	-34.63647461	1200.876587	1349.994385	149.1177979	1286.169224	37.56237534	909321.6412	0.428713739	0.656702042	0.227988303	0.552872191	0.042118562	390.8806393	17.35	34.97	17.62	26.30	5.15	18594.15	1
25.13390541	102.0237732	76.88986778	62.68583865	21.20183855	44193.51625	-0.582352102	0.318792492	0.901144594	-0.184844601	0.137382322	-130.3154435	-1.272827148	0.92175293	2.194580078	-0.265961083	0.317051314	-187.5025635	1089.989258	1208.944458	118.9552002	1152.286263	28.44645105	812361.8157	0.411349237	0.591993213	0.180643976	0.495477264	0.045758701	349.3114712	12.40	30.38	17.97	22.71	4.32	16012.68	1
0.080587484	359.4255371	359.3449496	56.00629144	89.22494267	39596.44805	-0.701433957	0.857045114	1.558479071	0.071329202	0.260782324	50.42974607	-0.916992188	1.088745117	2.005737305	0.156030291	0.366930184	110.3134155	946.0339355	1064.909424	118.8754883	1015.881112	28.57442291	718227.9459	0.375407785	0.614054203	0.238646418	0.520856124	0.043659418	368.2452794	8.50	37.01	28.52	22.29	5.89	15756.09	1
147.3342896	189.7268982	42.39260864	163.6643549	9.447331461	115710.6989	-0.439551353	0.589031816	1.028583169	0.001084102	0.179874395	0.766459771	-1.048461914	0.655151367	1.703613281	0.006132263	0.318838469	4.335510254	938.0275269	1043.069824	105.0422974	991.4473923	30.06128094	700953.3063	0.254315764	0.619045317	0.364729553	0.474850358	0.09099261	335.7192028	11.97	29.05	17.07	21.07	3.99	14898.06	1
84.27562714	130.1878662	45.91223907	106.4257802	8.926212486	75349.45238	-0.540428817	0.398771316	0.939200133	-0.093568242	0.151403555	-66.24631568	-0.721557617	0.603393555	1.324951172	-0.041368732	0.251505855	-29.2890625	1182.370728	1305.108154	122.7374268	1252.553685	32.01350756	886808.0093	0.461221009	0.606737733	0.145516723	0.538256896	0.030681638	381.0858827	15.41	29.01	13.60	23.11	3.60	16361.89	1
0.07564231	359.9958801	359.9202378	287.4325994	121.1012739	202065.1174	-0.505641758	0.434785426	0.940427184	-0.105973611	0.170114776	-74.49944842	-1.126831055	0.710571289	1.837402344	-0.144240226	0.353385344	-101.4008789	1195.965088	1311.351807	115.3867188	1261.302239	28.43713001	886695.474	0.448133469	0.61744529	0.169311821	0.527998519	0.037949869	371.1829586	14.74	29.58	14.84	21.97	3.74	15444.63	1
0.144612208	359.9952087	359.8505965	271.1112797	121.3732549	189777.8958	-1.05886364	0.521394193	1.580257833	-0.210295904	0.278449886	-147.2071328	-1.26953125	0.595581055	1.865112305	-0.179298793	0.388887819	-125.5091553	1176.616943	1296.677856	120.0609131	1245.292117	32.06592015	871704.4816	0.431426257	0.627890825	0.196464568	0.545974809	0.040224695	382.1823665	14.81	31.96	17.15	23.56	4.32	16488.96	1
0.185233906	359.9883728	359.8031389	54.82563675	39.44459241	38432.77136	-1.136050105	0.779375434	1.915425539	-0.038722707	0.46372206	-27.14461778	-1.34942627	1.040161133	2.389587402	-0.024652544	0.575604606	-17.28143311	892.8851318	996.3123779	103.4272461	945.8600614	26.74663276	663047.903	0.380878717	0.639644444	0.258765727	0.515661999	0.059895256	361.4790613	11.98	27.85	15.87	20.90	4.11	14649.63	1
56.79860687	121.7136841	64.91507721	92.41516149	20.49919445	65245.10402	-0.680683017	0.519567907	1.200250924	-0.125921734	0.226353527	-88.90074403	-1.234313965	0.632202148	1.866516113	-0.217941414	0.306378732	-153.8666382	958.6618042	1086.965332	128.3035278	1020.882663	33.5257205	720743.1599	0.40713197	0.636927724	0.229795754	0.493602755	0.046008678	348.4835449	13.78	32.50	18.72	25.33	5.19	17879.83	1
61.81141281	198.2881165	136.4767036	107.2591369	33.57111471	75295.9141	-1.471217513	0.391030669	1.862248182	-0.332816709	0.316325807	-233.6373298	-1.707336426	0.590576172	2.297912598	-0.453907415	0.437713211	-318.6430054	995.4428101	1133.111694	137.6688843	1067.726527	33.69622335	749544.0222	0.430150717	0.591521561	0.161370844	0.510418232	0.029183619	358.3135987	14.70	34.38	19.69	27.14	4.13	19054.80	1
0.072081119	359.9853821	359.913301	324.6097221	34.18300488	227876.0249	-0.85893023	0.586068332	1.444998562	-0.060262811	0.258043427	-42.30449298	-1.014892578	0.85559082	1.870483398	0.00018867	0.356957265	0.132446289	1032.324219	1146.843018	114.5187988	1095.350601	31.65100281	768936.1222	0.416751087	0.758284032	0.341532946	0.561628593	0.087557522	394.263272	11.35	29.06	17.71	22.77	3.89	15983.13	1
85.19664001	336.6955261	251.4988861	266.5588388	65.48998053	187390.8637	-1.576328874	0.489836901	2.066165775	-0.06100163	0.310354475	-42.88414577	-1.968505859	1.145141602	3.113647461	-0.296381857	0.72528139	-208.3564453	945.9434814	1050.575439	104.631958	990.9009641	29.45437879	696603.3777	0.291098177	0.743743598	0.452645421	0.485221312	0.120722619	341.1105821	1.44	33.73	32.28	23.13	7.71	16258.34	1
51.75888443	154.9332581	103.1743736	105.5876764	29.36880091	74228.13651	-1.276314497	0.939586461	2.215900958	-0.050866498	0.475128159	-35.75914844	-1.604003906	1.248291016	2.852294922	0.011633926	0.617975532	8.178649902	998.2613525	1113.593872	115.3325195	1063.922083	31.5310703	747937.2244	0.365458876	0.678041875	0.312582999	0.524776123	0.070155404	368.9176148	11.11	32.35	21.24	23.52	4.80	16532.38	1
0.84185797	118.4545746	117.6127166	50.83987437	29.87799622	35892.95131	-1.057391405	0.356723756	1.414115161	-0.257894644	0.286217176	-182.0736189	-1.477722168	0.701660156	2.179382324	-0.328152232	0.422840213	-231.6754761	1010.734863	1139.171631	128.4367676	1080.593864	32.11603876	762899.268	0.455861926	0.585175037	0.129313111	0.517870327	0.024183493	365.616451	14.41	32.15	17.75	25.99	3.97	18345.79	1
260.6575012	285.292572	24.6350708	272.9314546	5.943666514	191870.8126	-0.323702931	0.267860949	0.59156388	-0.014615943	0.128281123	-10.27500768	-1.339782715	0.565551758	1.905334473	0.004593525	0.305137571	3.229248047	871.3545532	1019.121277	147.7667236	949.9235286	36.56885993	667796.2406	0.410680681	0.590201259	0.179520577	0.509555592	0.037200022	358.2175809	19.98	34.23	14.25	26.67	2.68	18749.51	1
0.105153203	359.8190308	359.7138776	242.9837577	151.0629385	170088.6304	-0.907696486	0.719902515	1.627599001	-0.017415989	0.296645226	-12.19119217	-1.059936523	0.764282227	1.82421875	-0.045068883	0.337317767	-31.54821777	1024.421387	1142.557129	118.1357422	1081.457772	28.51566213	757020.4406	0.39088136	0.665765822	0.274884462	0.495164743	0.055863723	346.6153198	11.23	27.99	16.75	21.31	3.24	14914.76	1
40.32668304	157.1835632	116.8568802	97.75711771	33.78454946	69114.28222	-1.224090815	0.821090221	2.045181036	-0.186195899	0.365154469	-131.6405008	-1.414672852	0.85925293	2.273925781	-0.188668128	0.486022112	-133.3883667	1016.966553	1134.036377	117.0698242	1081.087292	30.23465623	764328.7156	0.381030858	0.67547965	0.294448793	0.546124647	0.047259031	386.1101257	15.05	29.09	14.04	23.70	2.84	16753.82	1
189.0569305	289.4715881	100.4146576	233.4907072	17.20373784	165077.93	-1.701369643	0.694117129	2.395486772	-0.228375128	0.309840233	-161.4612157	-2.059082031	1.603027344	3.662109375	-0.222509144	0.49442908	-157.3139648	1039.522949	1172.589722	133.0667725	1113.65012	31.23239467	787350.6351	0.445653617	0.618417621	0.172764003	0.540541618	0.036139649	382.1629241	13.01	34.50	21.49	23.48	3.95	16601.95	1
252.7919922	347.473175	94.68118286	293.7899139	15.04708911	207415.6792	-0.573885977	0.459718049	1.033604026	-0.001613067	0.228823915	-1.138825309	-1.074707031	0.800292969	1.875	0.094662242	0.306248538	66.83154297	1167.890015	1281.640869	113.7508545	1234.249311	27.77363422	871380.0137	0.408844143	0.652253151	0.243409008	0.556787405	0.042213099	393.0919079	8.73	27.87	19.13	19.69	5.09	13898.06	1
0.425373822	359.0669556	358.6415817	92.04806177	74.80592552	65077.97967	-1.205281019	0.499626875	1.704907894	-0.29878626	0.366190397	-211.241886	-1.815185547	1.003173828	2.818359375	-0.370576117	0.501756753	-261.9973145	1027.434448	1143.943604	116.5091553	1087.718769	29.81318225	769017.1694	0.397684395	0.628865421	0.231181026	0.515580316	0.053824382	364.5152837	8.13	32.67	24.55	23.24	4.03	16430.24	1
213.0166473	264.0007935	50.98414612	244.5178724	13.38749088	172874.1358	-0.861244917	0.681530714	1.542775631	-0.071756071	0.264803124	-50.73154231	-1.051757813	1.061523438	2.11328125	-0.086727763	0.381928519	-61.31652832	1027.280273	1135.619019	108.3387451	1084.943458	28.00489077	767055.0249	0.331449568	0.601559997	0.270110428	0.503515418	0.06065194	355.9854004	15.64	26.35	10.71	20.77	2.64	14684.37	1
1.37430799	359.9343262	358.5600182	264.0791941	109.955445	184855.4358	-1.141675591	0.54606086	1.687736452	-0.15073565	0.40347835	-105.514955	-1.583862305	0.885375977	2.469238281	-0.249147426	0.536421573	-174.4031982	1053.372925	1180.544067	127.1711426	1116.69105	32.51648019	781683.735	0.383492827	0.581646085	0.198153257	0.487269076	0.038989991	341.0883535	11.46	31.74	20.28	24.40	4.80	17083.11	1
159.0696716	233.7695313	74.69985962	197.0510066	13.86439865	139315.0617	-1.143806696	0.673141778	1.816948473	-0.115283645	0.247481105	-81.50553709	-1.244628906	0.909179688	2.153808594	-0.034780715	0.35180567	-24.58996582	1061.977905	1177.089844	115.1119385	1131.574396	27.07100475	800023.098	0.350875229	0.682289779	0.331414551	0.560336963	0.075589706	396.158233	11.24	31.60	20.37	20.01	6.16	14145.67	1
63.10452652	117.562233	54.45770645	93.01308682	13.26507251	65667.2393	-0.612159193	0.545433879	1.157593071	-0.085317172	0.227312928	-60.23392372	-0.918701172	0.796508789	1.715209961	-0.199687752	0.325670026	-140.9795532	1022.323547	1162.500977	140.1774292	1089.059251	34.30775676	768875.8309	0.404910296	0.560971498	0.156061202	0.477287948	0.033737569	336.9652915	16.99	36.08	19.09	26.33	4.63	18587.74	1
73.80162048	181.1433716	107.3417511	135.3190462	30.35174433	95670.56564	-0.650343597	0.082583696	0.732927293	-0.18103138	0.089352315	-127.9891857	-0.759277344	0.228271484	0.987548828	-0.246422839	0.145165614	-174.2209473	1111.108032	1194.217529	83.10949707	1153.17285	20.23172685	815293.2051	0.417411029	0.647987366	0.230576336	0.510602463	0.045262991	360.9959417	11.36	22.85	11.49	16.85	2.98	11916.37	1
0.035404563	359.9499207	359.9145161	132.2163496	157.5356537	93476.95916	-1.051212311	0.64226675	1.693479061	-0.0453993	0.342141984	-32.09730481	-1.143066406	0.773071289	1.916137695	-0.134511815	0.42403287	-95.09985352	895.3034668	1017.86322	122.5597534	955.8011695	31.37510627	675751.4268	0.292597264	0.577628851	0.285031587	0.465338746	0.065088139	328.9944935	12.39	30.95	18.56	24.13	2.92	17058.71	1
0.853280246	359.5007019	358.6474217	264.302222	87.31707858	186861.6709	-1.309373856	0.407311738	1.716685593	-0.21662971	0.327124011	-153.1572053	-1.625976563	0.624755859	2.250732422	-0.234986301	0.43327282	-166.1353149	1013.183899	1130.70166	117.5177612	1076.137357	28.31752342	760829.1114	0.451240897	0.653508186	0.202267289	0.543833028	0.041238566	384.4899508	14.44	28.36	13.92	21.79	2.47	15404.74	1
24.19712257	99.55448914	75.35736656	67.4779636	14.74725222	47639.4423	-0.825437784	0.429813355	1.255251139	-0.130826513	0.250174836	-92.36351821	-1.103149414	0.741455078	1.844604492	-0.137424026	0.343335586	-97.0213623	1035.345581	1152.248901	116.9033203	1099.342548	29.31267427	776135.8389	0.393287778	0.600373745	0.207085967	0.514261243	0.053109235	363.0684375	17.21	26.82	9.61	21.44	2.36	15139.70	1
143.7682343	275.5177917	131.7495575	216.7165012	35.62687228	152785.1334	-1.337193489	0.472725421	1.80991891	-0.299275818	0.3055159	-210.9894516	-1.85546875	0.766845703	2.622314453	-0.369617132	0.454443926	-260.5800781	1132.765747	1260.30835	127.5426025	1201.151451	31.12585247	846811.7729	0.447980851	0.604836285	0.156855434	0.521754209	0.03010173	367.836717	10.74	32.23	21.49	24.65	3.08	17375.38	1
88.46063232	288.6669922	200.2063599	255.5116991	43.66107227	180391.2595	-1.298318148	0.406895518	1.705213666	0.019673039	0.181688617	13.88916586	-1.473022461	0.937011719	2.41003418	-0.149468873	0.468621167	-105.5250244	1028.660156	1126.711914	98.05175781	1067.79822	27.81358865	753865.5435	0.284204483	0.594229937	0.310025454	0.429707847	0.081634711	303.3737399	1.21	30.09	28.88	19.04	6.77	13445.45	1
127.1609955	222.8156891	95.6546936	168.1836834	28.49414629	119074.0478	-0.750378191	0.542901218	1.293279409	-0.209741962	0.23923546	-148.4973089	-1.388671875	0.580566406	1.969238281	-0.314307434	0.356425461	-222.5296631	1069.370605	1191.80896	122.4383545	1132.054739	29.59258981	801494.7549	0.431892157	0.612334251	0.180442095	0.504314094	0.040740776	357.0543788	11.91	31.99	20.09	23.75	4.10	16813.82	1
0.24397549	359.930542	359.6865665	189.1355186	159.4973402	132394.863	-1.43006444	1.358515263	2.788579702	-0.226160762	0.548770048	-158.3125332	-2.053466797	1.932006836	3.985473633	-0.210385829	0.710171754	-147.2700806	1010.588196	1121.911255	111.3230591	1071.357915	28.93328587	749950.5402	0.46550855	0.653904796	0.188396245	0.559332553	0.041888898	391.5327868	13.78	34.02	20.24	22.82	4.30	15972.63	1
190.9723969	262.5956116	71.62321472	232.6297314	19.38869143	163073.4417	-0.509404719	0.139183745	0.648588464	-0.131165394	0.108683392	-91.94694086	-0.967407227	0.534179688	1.501586914	-0.196839511	0.292907188	-137.9844971	1182.493164	1275.031616	92.53845215	1228.69308	24.00842342	861313.8489	0.428804904	0.57531774	0.146512836	0.499714478	0.033876352	350.2998488	9.73	26.83	17.10	18.13	3.79	12710.89	1
285.9742432	347.4474182	61.47317505	312.0962304	14.36141678	220339.9387	-0.662883282	0.604040861	1.266924143	0.006669337	0.255037421	4.708551909	-1.229370117	0.897705078	2.127075195	0.042051494	0.34656715	29.68835449	1055.383057	1161.181641	105.798584	1111.822458	24.89728356	784946.6554	0.380554169	0.626708508	0.246154338	0.517536161	0.047062879	365.3805296	10.80	26.40	15.60	19.06	3.68	13453.80	1
5.152638912	348.1966858	343.0440469	122.5943012	28.11803972	86674.17096	-0.569564641	1.348003387	1.917568028	-0.098821683	0.179977841	-69.86692992	-0.70300293	1.259521484	1.962524414	-0.040179435	0.446689226	-28.40686035	1030.239014	1130.357178	100.1181641	1081.049001	26.32614652	764301.6438	0.416202694	0.643839359	0.227636665	0.536089643	0.061887047	379.0153778	0.74	27.68	26.94	19.23	4.73	13593.79	1
0.004111745	359.9642029	359.9600911	158.3815385	159.3962785	111658.9846	-0.488031209	0.199048564	0.687079772	-0.160977965	0.136270739	-113.4894655	-0.860412598	0.620239258	1.480651855	-0.160956893	0.240673374	-113.4746094	990.015625	1094.147339	104.1317139	1049.654242	24.91619084	740006.2407	0.473849475	0.627991378	0.154141903	0.535859715	0.037673687	377.7810987	12.80	26.24	13.43	19.97	3.12	14077.53	1
1.870563388	358.1758728	356.3053094	277.7551765	57.17630619	196095.1546	-1.244729161	0.360865951	1.605595112	-0.026927273	0.230570123	-19.01065467	-1.447387695	0.852600098	2.299987793	-0.15834067	0.462093177	-111.7885132	966.4182739	1080.694092	114.2758179	1015.827615	30.0530776	717174.2962	0.345744431	0.587565958	0.241821527	0.452637703	0.044667617	319.5622186	5.12	30.00	24.89	20.99	5.73	14818.50	1
174.1309662	239.1729736	65.04200745	211.5691184	16.29829326	149579.3667	-0.89975822	0.513244033	1.413002253	-0.159439816	0.209155117	-112.7239501	-1.135864258	0.954956055	2.090820313	-0.122507487	0.372230865	-86.61279297	1105.577637	1231.847412	126.2697754	1174.684962	31.93137842	830502.2684	0.487098217	0.606477678	0.119379461	0.538765895	0.026186724	380.9074879	13.47	30.56	17.09	23.75	3.75	16794.60	1
126.9043655	161.8911285	34.986763	145.4590255	9.102959804	102839.531	-0.413898706	0.436450481	0.850349188	-0.008164198	0.177480299	-5.772087761	-0.783691406	0.758789063	1.542480469	-0.063113977	0.256739093	-44.62158203	1040.246216	1155.328125	115.0819092	1095.976963	28.31634362	774855.7125	0.39505139	0.582426906	0.187375516	0.486631933	0.041451509	344.0487765	15.52	29.42	13.90	21.54	3.54	15232.00	1
118.4492188	252.4533081	134.0040894	196.4742272	40.2122968	138907.2786	-1.453978539	0.593073547	2.047052085	-0.324776855	0.347447219	-229.6172363	-1.829223633	0.921264648	2.750488281	-0.414682175	0.461907685	-293.1802979	993.8356934	1121.319214	127.4835205	1062.849237	31.51302026	751434.4104	0.458435893	0.600932598	0.142496705	0.529161974	0.025975328	374.1175159	11.72	30.85	19.13	26.14	2.97	18484.03	1
12.31934166	142.5113068	130.1919651	126.0904134	19.88539116	88263.28939	-0.835136771	0.3791821	1.214318871	-0.048789061	0.184886379	-34.15234291	-0.948730469	0.665283203	1.614013672	-0.221284877	0.286732272	-154.8994141	1052.563599	1165.974365	113.4107666	1100.141071	29.31391519	770098.7495	0.381439507	0.540737987	0.15929848	0.444210342	0.034098602	310.9472395	4.83	32.96	28.13	21.11	6.28	14774.83	1
119.3241959	225.1946869	105.870491	172.1962026	30.48541287	121742.7153	-1.003738999	0.459435493	1.463174492	-0.183347759	0.248889318	-129.6268659	-1.340087891	1.051513672	2.391601563	-0.160252594	0.38720445	-113.298584	1057.159424	1165.185059	108.0256348	1114.857454	26.37842775	788204.2202	0.396548092	0.681501329	0.284953237	0.546505074	0.056736295	386.3790874	5.56	26.98	21.42	20.66	3.29	14607.57	1
49.07600784	90.27822113	41.20221329	68.1060911	6.405362169	47606.15768	-0.305904388	0.330384403	0.636288792	0.030281252	0.091578714	21.16659531	-0.978393555	1.141601563	2.119995117	0.09832947	0.398124566	68.7322998	1129.978027	1235.492676	105.5146484	1188.617927	31.46627033	830843.931	0.424392849	0.751568854	0.327176005	0.566218125	0.098987	395.7864691	7.59	32.35	24.76	20.46	7.15	14298.63	1
0.026807908	359.7465515	359.7197436	67.07284893	66.22905222	47085.13995	-0.523382366	0.903981626	1.427363992	-0.012813889	0.256929711	-8.995350111	-1.079223633	1.228881836	2.308105469	0.075214614	0.44153416	52.80065918	1125.368286	1231.197998	105.8297119	1186.338021	28.38885726	832809.2904	0.412689924	0.685819924	0.27313	0.554682474	0.055707859	389.3870964	1.19	27.91	26.73	19.25	5.79	13513.04	1
216.4309082	279.819519	63.38861084	252.0076244	16.42937537	177917.3828	-0.405553132	0.438813418	0.84436655	-0.091726309	0.154379478	-64.75877424	-0.879272461	1.112915039	1.9921875	-0.172989021	0.313299736	-122.130249	1176.094482	1276.930786	100.8363037	1225.29625	23.5903286	865059.1525	0.374014974	0.55359298	0.179578006	0.476848286	0.037298848	336.65489	10.65	28.04	17.39	19.08	4.17	13468.41	1
209.5162354	293.8660278	84.34979248	258.2550301	23.67431793	182586.3063	-1.011981487	0.455153167	1.467134655	-0.176045829	0.230923071	-124.4644013	-1.260742188	0.872436523	2.133178711	-0.1844643	0.308132722	-130.4162598	1098.729248	1209.077148	110.3479004	1162.925654	26.10436636	822188.4376	0.437381804	0.650607586	0.213225782	0.540781649	0.044425215	382.3326261	13.61	27.47	13.86	20.69	2.81	14625.76	1
99.62441254	148.6878815	49.06346893	115.6505238	12.90538491	81302.31824	-0.533752024	0.230961263	0.764713287	-0.094321234	0.14902054	-66.30782752	-0.922485352	0.549316406	1.471801758	-0.106017111	0.248323968	-74.5300293	1087.132935	1208.503296	121.3703613	1150.281517	28.7389508	808647.9065	0.431974381	0.590374649	0.158400267	0.517960255	0.039035457	364.1260592	17.07	27.74	10.68	22.01	2.92	15473.21	1
1.033583164	67.37651825	66.34293509	18.96501759	12.26992934	13446.19747	-1.000190735	0.266862243	1.267052978	0.06534886	0.097801098	46.33234183	-1.017333984	0.505615234	1.522949219	-0.10235742	0.280545146	-72.57141113	920.3390503	1038.139526	117.8004761	964.3046438	32.61214233	683691.9924	0.266550064	0.486698419	0.220148355	0.389885454	0.075601517	276.4287868	2.66	29.98	27.32	21.58	7.63	15298.40	1
239.3870697	292.9595642	53.57249451	260.3325065	16.77046778	183794.7496	-0.473697543	0.214670241	0.688367784	-0.127398512	0.147993006	-89.94334968	-0.849365234	0.579833984	1.429199219	-0.171592561	0.286697797	-121.1443481	1025.349854	1149.749878	124.4000244	1089.923905	33.52927503	769486.2766	0.439524204	0.603188813	0.163664609	0.509603111	0.036633895	359.7797961	17.10	31.40	14.30	24.11	3.11	17021.49	1
286.2897339	321.0686951	34.77896118	304.3841715	8.756668831	212764.5359	-0.5492782	0.536224723	1.085502923	-0.019234637	0.206758635	-13.44501107	-0.929077148	0.990356445	1.919433594	-0.008088337	0.333186704	-5.653747559	1011.893433	1146.340454	134.4470215	1081.452989	34.32930688	755935.639	0.447995514	0.548933923	0.10093841	0.5062635	0.020933746	353.8781862	16.06	30.82	14.76	25.78	3.04	18021.63	1
217.7738647	295.7734375	77.99957275	258.5636326	21.1560455	181770.2337	-0.502752006	0.135873765	0.638625771	-0.140810832	0.128213205	-98.99001478	-1.009765625	0.47668457	1.486450195	-0.204388766	0.292838705	-143.6853027	1179.9198	1274.90625	94.9864502	1230.291071	22.19677277	864894.6232	0.350433618	0.629878879	0.279445261	0.509541839	0.067988356	358.2079126	10.80	31.39	20.59	18.11	3.54	12733.01	1
3.259383202	359.2818909	356.0225077	229.1447824	52.40744854	161776.2163	-0.464731365	0.168172538	0.632903904	-0.018037404	0.08740872	-12.73440696	-0.918273926	0.451049805	1.36932373	-0.217466619	0.268549619	-153.5314331	895.2488403	985.0529175	89.80407715	923.3164056	25.00654449	651861.3824	0.184345707	0.490099102	0.305753395	0.355044113	0.084109357	250.661144	0.27	28.96	28.69	17.22	8.91	12154.55	1
250.1391144	298.4737549	48.3346405	277.4834718	11.36101096	194238.4303	-0.706712544	0.756274641	1.462987185	-0.003342465	0.246734593	-2.339725773	-1.811523438	2.302368164	4.113891602	0.022523717	0.661371541	15.76660156	1126.640381	1250.166016	123.5256348	1190.375927	39.09256329	833263.149	0.259774774	0.746845305	0.487070531	0.499821875	0.130763484	349.8753123	4.74	43.16	38.41	24.38	9.36	17063.62	1
233.5900421	282.6931763	49.10313416	251.73395	8.970055858	177724.1687	-0.396849632	0.54211235	0.938961983	-0.064372097	0.133338684	-45.44670031	-0.682983398	1.156982422	1.83996582	-0.049520779	0.287316704	-34.96166992	1084.920654	1180.910156	95.98950195	1136.376247	23.98504427	802281.6304	0.435825139	0.621769786	0.185944647	0.541750797	0.046823579	382.4760626	10.27	24.74	14.47	17.71	3.12	12502.89	1
0.688191772	359.9934998	359.305308	113.8777258	113.839834	80511.55213	-1.377490044	1.070826411	2.448316455	-0.163912189	0.412987995	-115.8859177	-1.667175293	1.451416016	3.118591309	-0.108296568	0.676641086	-76.56567383	1009.24939	1123.553711	114.3043213	1073.890782	28.78562167	759240.7832	0.446043223	0.759336948	0.313293725	0.571163263	0.070759506	403.812427	1.98	31.51	29.53	22.60	5.21	15981.02	1
14.18774796	325.6101379	311.42239	208.2082677	41.14472799	147619.6618	-1.375188112	0.504102349	1.879290462	-0.026822748	0.262916792	-19.01732829	-1.974060059	1.126831055	3.100891113	-0.13356739	0.682036542	-94.69927979	985.8173218	1106.245605	120.4282837	1041.544487	36.87267288	738455.0414	0.327717453	0.716462433	0.38874498	0.492420813	0.112074349	349.1263563	0.61	38.53	37.92	24.29	7.75	17219.46	1
10.47440147	359.5995178	349.1251163	144.0817312	63.82948128	101721.7022	-1.653120637	0.443124235	2.096244872	-0.12658291	0.310136302	-89.36753411	-1.798461914	1.221313477	3.019775391	-0.122162643	0.648693313	-86.24682617	1019.76416	1097.59021	77.8260498	1066.88295	20.88893134	753219.3627	0.399361849	0.813384533	0.414022684	0.595816645	0.103425886	420.6465515	0.42	34.24	33.82	16.02	7.67	11312.63	1
257.0522766	290.0317993	32.97952271	271.405647	8.763856583	191883.7924	-0.376580417	0.55127579	0.927856207	-0.024417426	0.150431124	-17.2631202	-0.970092773	0.979858398	1.949951172	-0.074019674	0.314880395	-52.33190918	1176.162109	1310.255005	134.0928955	1239.811166	33.58578306	876546.4943	0.409022659	0.591433108	0.182410449	0.490429862	0.035127747	346.7339125	15.67	32.99	17.32	24.72	3.93	17475.44	1
237.463974	306.2614441	68.79747009	272.8450798	13.84030278	192082.9362	-0.68551451	0.581986666	1.267501175	-0.059644335	0.260374588	-41.98961156	-1.007568359	1.082397461	2.08996582	-0.016910726	0.386337087	-11.90515137	934.619812	1046.965088	112.3452759	998.9399218	29.30255642	703253.705	0.342265069	0.592165112	0.249900043	0.516623824	0.049354925	363.7031718	12.34	29.63	17.29	22.09	4.32	15554.88	1
271.1983643	327.5192566	56.32089233	297.8541077	16.2397139	209689.2918	-0.403583705	0.369017392	0.772601098	-0.082789044	0.126650442	-58.28348702	-0.775878906	0.671508789	1.447387695	-0.097485282	0.262978956	-68.62963867	1183.624634	1283.785278	100.1606445	1233.229979	26.22899428	868193.905	0.400862396	0.610342085	0.20947969	0.513867337	0.044123212	361.7626054	12.26	27.57	15.31	19.51	2.97	13733.44	1
0.04386843	359.9789429	359.9350744	177.0483536	164.4407304	125527.2827	-0.724809527	0.449427396	1.174236923	-0.110966347	0.231179359	-78.67513979	-1.583740234	1.482910156	3.066650391	-0.050634043	0.485804069	-35.89953613	1176.598755	1311.536011	134.9372559	1255.75731	35.44215324	890331.9331	0.288143575	0.722861052	0.434717476	0.526283788	0.109534862	373.1352057	9.63	41.49	31.85	23.97	7.31	16991.69	1
0.15185675	359.9816284	359.8297717	156.8971929	164.4259753	110141.8294	-0.637164712	0.832069337	1.469234049	0.034864596	0.300335269	24.47494645	-1.374145508	1.177978516	2.552124023	0.066172021	0.520192853	46.45275879	1192.518188	1306.953857	114.4356689	1252.615449	32.71783183	879336.0455	0.315596431	0.647827744	0.332231313	0.487819026	0.074344847	342.4489559	8.90	31.66	22.76	22.70	6.19	15935.20	1
90.19451904	135.3280487	45.13352966	110.9539448	10.94213039	78333.48505	-0.815161586	0.603426397	1.418587983	-0.028286294	0.219471711	-19.97012332	-1.607788086	1.054321289	2.662109375	-0.068490091	0.446394692	-48.35400391	1059.470459	1160.661377	101.190918	1111.230119	27.35450932	784528.464	0.403093755	0.600705862	0.197612107	0.492187972	0.044823056	347.4847081	6.68	29.16	22.48	20.45	3.95	14435.57	1
264.7635803	303.0197449	38.25616455	283.4023443	9.47842132	199515.2504	-0.501883805	0.564715147	1.066598952	-0.014763145	0.181783836	-10.39325385	-1.058837891	0.919555664	1.978393555	-0.002950495	0.380655578	-2.077148438	1168.084106	1305.00354	136.9194336	1236.785684	36.45602791	870697.1213	0.446168065	0.635263383	0.189095318	0.520344094	0.035217485	366.3222424	17.38	33.81	16.43	25.33	3.95	17830.83	1
159.5393677	326.3455505	166.8061829	298.0807102	35.08868447	208656.4971	-1.381794333	0.3835105	1.765304834	-0.12574721	0.297313806	-88.02304715	-1.744140625	1.081298828	2.825439453	-0.217208339	0.644076303	-152.0458374	975.8972168	1096.676392	120.7791748	1033.353226	34.02954283	723347.2579	0.356118977	0.761213601	0.405094624	0.515077709	0.113202841	360.5543963	2.32	36.15	33.83	23.44	7.02	16407.70	1
2.812726974	344.0826721	341.2699451	248.8500334	49.59057819	175688.1236	-1.169814944	0.435283005	1.60509795	0.008792665	0.229668294	6.207621562	-1.85168457	0.807373047	2.659057617	-0.197988537	0.482342076	-139.7799072	945.8950195	1071.842407	125.9473877	996.2002101	35.10314044	703317.3483	0.313808739	0.669111371	0.355302632	0.442426753	0.076556441	312.3532875	0.96	32.94	31.98	24.16	7.39	17054.03	1
175.9008179	324.5403748	148.6395569	288.9378441	44.0693146	203123.3044	-1.575554848	0.78890866	2.364463508	-0.147309737	0.400189965	-103.5587449	-1.924133301	1.343505859	3.26763916	-0.210250051	0.720911937	-147.8057861	966.4072266	1092.611694	126.2044678	1029.800149	33.46407029	723949.5046	0.356846541	0.722142398	0.365295857	0.537831479	0.08713581	378.0955297	7.28	33.28	26.00	24.98	5.93	17563.68	1
0.144080892	358.7000427	358.5559618	287.9539194	64.00130783	203583.421	-1.170287132	0.806688964	1.976976097	-0.105859151	0.316549779	-74.84241959	-1.47265625	1.262939453	2.735595703	-0.014508411	0.586786305	-10.25744629	1171.325439	1285.006104	113.6806641	1235.946514	31.36208765	873814.1851	0.421833575	0.750835896	0.329002321	0.570341251	0.084560439	403.2312646	0.68	28.83	28.15	21.56	6.07	15244.99	1
277.5526733	353.2189941	75.6663208	312.8433537	15.70874398	220867.4077	-0.557443202	0.415304422	0.972747624	-0.147815121	0.173668435	-104.3574752	-0.930053711	1.062988281	1.993041992	-0.033251884	0.449756066	-23.47583008	1145.749756	1264.677734	118.9279785	1214.090944	32.52837203	857148.2067	0.449409485	0.822441399	0.373031914	0.598569355	0.101540879	422.5899645	2.36	32.40	30.04	22.34	5.93	15771.72	1
240.6615143	303.6331787	62.97166443	259.675923	12.189126	182552.1739	-1.071361542	0.652286768	1.72364831	-0.083190239	0.276323854	-58.48273822	-1.381896973	0.820922852	2.202819824	-0.111226979	0.476239544	-78.19256592	997.8895874	1110.667969	112.7783813	1058.215221	29.0124246	743925.3006	0.374906212	0.625748217	0.250842005	0.513694271	0.061889697	361.1270726	9.86	29.65	19.80	21.69	5.49	15247.49	1
128.2089996	209.8749542	81.66595459	166.2953086	22.10486074	117071.8973	-0.684524119	0.197888494	0.882412612	-0.200249061	0.147230519	-140.9753389	-1.173706055	0.555908203	1.729614258	-0.279047879	0.321436877	-196.449707	1066.842529	1189.999268	123.1567383	1128.767896	34.1007238	794652.5991	0.236605898	0.586832643	0.350226745	0.481609929	0.096948798	339.0533899	4.66	32.98	28.32	24.59	4.62	17313.90	1
10.81891632	343.2238464	332.4049301	130.7494685	58.55803058	92439.87421	-1.404781222	0.791948318	2.196729541	0.083243814	0.203811593	58.85337652	-1.638793945	1.018188477	2.656982422	-0.097631732	0.610007925	-69.02563477	1112.497681	1194.835938	82.33825684	1148.036216	25.40725729	811661.6049	0.255304217	0.641445637	0.386141419	0.444402825	0.121285899	314.1927971	1.05	29.75	28.69	18.11	6.21	12806.17	1
0.193734333	359.7875061	359.5937718	48.10918158	73.22385842	34013.19138	-0.990275204	0.609934628	1.600209832	-0.021957954	0.239813829	-15.52427349	-1.701538086	1.068725586	2.770263672	-0.136626204	0.517455819	-96.59472656	1107.031738	1189.819214	82.78747559	1144.3747	24.46990651	809072.9131	0.2741597	0.667095721	0.392936021	0.458929819	0.097654722	324.4633821	0.46	27.19	26.73	17.24	5.45	12185.39	1
76.66573334	245.0139771	168.3482437	157.8620581	36.13855775	111608.4751	-0.892194331	0.312382311	1.204576641	-0.308935787	0.235172435	-218.4176013	-1.310913086	0.683959961	1.994873047	-0.363378803	0.393938192	-256.9088135	1043.810425	1139.098267	95.2878418	1094.918864	24.76600952	774107.6371	0.371076345	0.660323203	0.289246857	0.532595997	0.063941606	376.5453696	7.15	29.48	22.33	19.60	3.30	13854.87	1
293.8754272	316.5030518	22.62762451	302.9812064	5.753895515	212995.7881	-0.351414531	0.397057205	0.748471737	0.036829421	0.108233794	25.89108268	-1.244018555	0.988037109	2.232055664	0.019351531	0.386639882	13.60412598	1024.125854	1142.302368	118.1765137	1085.850209	31.47739529	763352.6973	0.368615687	0.638520718	0.269905031	0.491095101	0.061125768	345.2398563	9.86	29.50	19.64	22.63	4.48	15906.02	1
0.278778732	359.9519043	359.6731256	104.3759243	136.9583397	73793.77847	-0.491337866	1.057801604	1.54913947	-0.080636908	0.269205817	-57.0102938	-1.085327148	1.355712891	2.441040039	-0.160638833	0.443909102	-113.5716553	1135.007446	1239.403687	104.3962402	1180.161921	28.83238975	834374.4781	0.332829952	0.599446952	0.266617	0.46060698	0.06653329	325.6491347	3.89	27.81	23.92	20.44	6.34	14454.09	1
265.8486023	287.0213928	21.17279053	275.6072623	6.156379785	194027.5127	-0.378855556	0.187847376	0.566702932	-0.041639918	0.100665107	-29.31450248	-0.911987305	1.345214844	2.257202148	-0.031143362	0.357644448	-21.92492676	1045.630737	1186.067993	140.4372559	1122.594902	34.11249316	790306.8108	0.397402495	0.59179306	0.194390565	0.514326334	0.060757373	362.0857389	18.72	33.97	15.25	24.96	4.16	17568.91	1
77.86296082	223.2046204	145.3416595	107.8807779	21.28039224	76163.82923	-1.236081839	0.43354407	1.669625908	-0.089860065	0.264550036	-63.44120562	-1.487182617	0.828857422	2.316040039	-0.101475529	0.436927577	-71.64172363	1034.509766	1128.979004	94.46923828	1084.619044	24.49479803	765741.045	0.350210965	0.61165607	0.261445105	0.501318705	0.066990418	353.9310056	5.76	26.43	20.67	17.26	3.85	12185.01	1
0.297424734	359.9580994	359.6606746	196.4727225	148.0259985	138906.2148	-1.217819095	0.625757754	1.843576849	-0.279669236	0.381792812	-197.7261502	-1.661865234	1.037841797	2.699707031	-0.267862323	0.569880212	-189.3786621	1043.343262	1150.033325	106.6900635	1105.969616	27.4278941	781920.5186	0.420758903	0.709576249	0.288817346	0.564411918	0.057876556	399.0392262	10.98	29.81	18.83	22.02	4.09	15570.12	1
0.52593559	359.666687	359.1407514	278.0481087	125.6524846	196580.0129	-1.136594415	0.73487848	1.871472895	0.052240479	0.271942843	36.93401888	-1.272583008	0.996337891	2.268920898	0.074304907	0.382717905	52.53356934	1024.486084	1140.545776	116.0596924	1084.96516	31.84214036	767070.3678	0.343575656	0.594339252	0.250763595	0.499763815	0.060932336	353.3330171	9.65	36.57	26.91	23.38	5.41	16531.47	1
13.08954144	358.7042236	345.6146822	96.13140358	58.13603098	67388.11391	-0.767783701	0.505350888	1.273134589	-0.017191327	0.170135197	-12.05112002	-1.089599609	0.655761719	1.745361328	-0.269629986	0.304694188	-189.0106201	1082.965454	1178.412598	95.44714355	1115.289629	26.96531644	781818.0299	0.187578842	0.481473982	0.29389514	0.357519127	0.081935017	250.6209082	0.16	32.69	32.52	18.93	8.67	13267.99	1
0.234826803	359.9000244	359.6651976	127.0681333	150.0511991	88947.69331	-0.896237552	0.481223822	1.377461374	-0.163274598	0.27044967	-114.2922188	-1.304321289	0.820922852	2.125244141	-0.171648124	0.378734375	-120.1536865	1049.683228	1152.528809	102.8455811	1102.602709	26.17079238	771821.8961	0.431078047	0.601554632	0.170476586	0.530282627	0.030385963	371.1978386	12.83	26.84	14.01	19.68	3.30	13774.15	1
106.1573639	179.0231323	72.86576843	147.1669644	21.20411722	104047.0438	-0.730915785	0.300022006	1.030937791	-0.163766318	0.175971243	-115.7827866	-1.147399902	0.628173828	1.77557373	-0.248647385	0.373694697	-175.7937012	982.0003662	1106.693481	124.6931152	1047.717247	27.87997864	740736.0939	0.414335966	0.644652784	0.230316818	0.518125126	0.049658288	366.3144642	13.50	33.24	19.75	22.29	4.75	15757.87	1
189.369278	326.0501404	136.6808624	279.9488625	39.79982421	197643.8969	-1.168104529	0.459170312	1.627274841	-0.194370748	0.324896072	-137.2257479	-1.439697266	0.845336914	2.28503418	-0.202199617	0.507265239	-142.7529297	1061.326172	1166.786987	105.4608154	1116.868333	26.15359992	788509.0431	0.442265153	0.617991686	0.175726533	0.556849853	0.022907908	393.1359963	12.34	29.29	16.95	20.90	4.04	14758.31	0
236.9122925	274.7200012	37.80770874	259.8299175	6.996695989	183699.7517	-0.489131957	0.467787117	0.956919074	0.055417882	0.125474717	39.18044225	-0.552307129	0.927001953	1.479309082	0.092591541	0.283621012	65.46221924	951.7928467	1101.627563	149.8347168	1027.057349	39.16851514	726129.546	0.444626421	0.612081468	0.167455047	0.511230372	0.042304041	361.4398727	14.54	32.22	17.68	26.54	3.46	18763.90	0
123.0072708	294.3948364	171.3875656	234.2137466	37.11790873	164886.4776	-1.058615923	0.791428089	1.850044012	0.119316589	0.305395452	83.998879	-1.424194336	1.122192383	2.546386719	-0.003101956	0.533199987	-2.183776855	841.5562744	951.3186035	109.7623291	885.1048031	27.18255565	623113.7814	0.297373235	0.579021096	0.281647861	0.444126665	0.052742021	312.6651719	1.91	31.50	29.59	20.19	6.42	14210.31	0
7.558227539	356.6526489	349.0944214	327.115037	29.85272	229961.871	-0.496236354	0.172418073	0.668654427	-0.030195576	0.089467709	-21.22748963	-0.919189453	0.134643555	1.053833008	-0.215774124	0.17469831	-151.689209	1011.223267	1073.932495	62.70922852	1030.786812	17.43477976	724643.1291	0.139236093	0.461183608	0.321947515	0.308532994	0.088651375	216.8986947	0.50	27.69	27.19	12.74	7.55	8957.51	0
0.12101905	359.9589539	359.8379348	80.79833113	100.4366169	56882.02511	-0.939469337	0.663539886	1.603009224	0.182429828	0.279155283	128.4305991	-1.1640625	0.852172852	2.016235352	0.201043476	0.407710663	141.5346069	993.0170288	1106.180786	113.1637573	1051.5391	28.33046894	740283.5262	0.311482847	0.565974534	0.254491687	0.470930393	0.063083897	331.5349964	14.14	27.11	12.97	21.32	3.67	15010.38	0
0.377528638	359.8204956	359.442967	188.6197558	80.41773371	132411.0686	-0.974674523	1.128966093	2.103640616	0.008857552	0.161736928	6.218001491	-1.344726563	1.293212891	2.637939453	0.090862915	0.721284561	63.7857666	789.8484497	878.1257935	88.27734375	837.70481	30.95972965	588068.7766	0.184056535	0.710383773	0.526327237	0.495372093	0.17603677	347.7512095	0.48	34.74	34.27	19.96	10.75	14010.27	0
0.094952397	359.9416809	359.8467285	42.86712218	76.67196239	30264.18826	-0.546406746	1.11395359	1.660360336	0.061347111	0.385430129	43.31106052	-0.932128906	1.58203125	2.514160156	0.090043627	0.532170776	63.57080078	984.9389648	1136.947998	152.0090332	1061.05657	39.89624666	749105.9387	0.430529505	0.610231638	0.179702133	0.496768399	0.045673354	350.7184896	17.91	36.60	18.69	27.84	3.75	19653.97	0
0.139553398	359.7431641	359.6036107	221.0825839	125.1790197	155421.0564	-1.580926657	0.73489958	2.315826237	-0.051762754	0.470644624	-36.3892164	-1.784423828	1.146240234	2.930664063	-0.295715592	0.73945393	-207.8880615	978.5628052	1091.896484	113.3336792	1027.748003	27.34612556	722506.8464	0.356213331	0.551781356	0.195568025	0.453144199	0.050328958	318.5603718	8.27	36.11	27.84	25.33	6.94	17806.51	0
305.8764954	325.5941772	19.71768188	313.234375	3.991828639	221143.4688	-0.266883165	0.235102355	0.50198552	0.037263386	0.111992372	26.30795054	-1.034606934	0.48815918	1.522766113	-0.093087518	0.286499824	-65.7197876	916.6151733	1077.411743	160.7965698	989.3710535	42.51001613	698495.9637	0.237634659	0.576600969	0.33896631	0.442647376	0.072339306	312.5090471	7.63	35.19	27.57	29.05	4.00	20507.03	0
0.031436659	359.9986267	359.96719	168.4341624	169.3762131	118240.782	-1.057270408	0.268033803	1.32530421	-0.036462528	0.167909493	-25.59669453	-1.272827148	0.438842773	1.711669922	-0.176411338	0.341144993	-123.8407593	968.1397095	1069.169312	101.0296021	1010.91426	28.82646286	709661.8103	0.36941871	0.588412523	0.218993813	0.459535931	0.051067214	322.5942236	2.34	28.02	25.68	19.90	6.20	13968.45	0
9.190668106	359.9587097	350.7680416	287.5003787	59.08723775	202400.2666	-0.596739709	1.480809093	2.077548802	-0.078809058	0.248348288	-55.48157702	-1.091918945	1.521728516	2.613647461	0.097249465	0.593578706	68.46362305	1113.609009	1226.287354	112.6783447	1180.36094	28.24234216	830974.1014	0.468154669	0.610168695	0.142014027	0.541375286	0.025065628	381.1282012	0.83	28.36	27.54	20.71	5.71	14580.65	0
0.133866668	359.9733887	359.839522	178.1874583	162.1781386	126156.7205	-0.609814167	1.306071162	1.915885329	-0.092701656	0.374897582	-65.63277241	-0.968994141	1.756591797	2.725585938	-0.077976895	0.509001943	-55.2076416	1202.111938	1338.042358	135.9304199	1274.316042	37.74514993	902215.7574	0.388824165	0.608831346	0.220007181	0.510340607	0.058729059	361.3211496	16.26	33.46	17.20	26.11	4.33	18482.40	0
0.03065042	359.9352417	359.9045913	170.3627599	160.4825661	120446.4713	-0.43562007	0.83193624	1.26755631	0.07212625	0.202703989	50.99325899	-1.106445313	1.236328125	2.342773438	0.254430099	0.475667623	179.8820801	1059.621094	1152.80249	93.18139648	1126.423814	27.35629994	796381.6366	0.171126962	0.88190043	0.710773468	0.633997155	0.169644422	448.2359887	0.36	36.65	36.29	18.28	12.39	12923.53	0
181.9941864	275.4632874	93.46910095	219.1234289	24.26257194	154920.2642	-1.304741025	0.804349542	2.109090567	-0.118156918	0.424292442	-83.53694095	-1.437866211	0.999511719	2.43737793	-0.069373146	0.505435456	-49.04681396	984.50354	1120.287842	135.7843018	1060.930791	33.61156437	750078.0696	0.455209225	0.634155214	0.178945988	0.557331745	0.039651464	394.0335435	16.02	28.44	12.42	24.77	2.39	17513.29	0
129.8204651	318.7878113	188.9673462	250.0281863	66.76415619	176019.8431	-0.256439418	0.822217345	1.078656763	0.114333218	0.174548882	80.49058555	-0.252380371	0.888183594	1.140563965	0.365623994	0.235937463	257.399292	958.7666016	1021.362671	62.59606934	996.7506148	15.01032	701712.4328	0.492280602	0.690886378	0.198605776	0.594788242	0.049107377	418.7309226	2.22	27.22	25.00	16.22	5.87	11415.56	0
0.121969715	359.203125	359.0811553	266.2717777	81.77756895	187987.8751	-0.629482627	1.308834553	1.93831718	0.056594445	0.415072832	39.95567786	-0.793701172	1.483032227	2.276733398	0.378864407	0.543484131	267.4782715	1352.09668	1474.099365	122.0026855	1421.338591	28.82787696	1003465.045	0.454374403	0.71964258	0.265268177	0.581042081	0.059532162	410.2157093	3.42	36.44	33.02	26.60	8.13	18782.58	0
238.6788025	323.7884521	85.10964966	294.1138121	25.01680236	207056.1237	-0.447145611	0.517044783	0.964190394	0.132238062	0.176559766	93.0955953	-0.400512695	0.784667969	1.185180664	0.196243286	0.268204652	138.1552734	989.8067627	1102.294556	112.487793	1049.840455	28.25326545	739087.6805	0.412761062	0.618413031	0.205651969	0.515744581	0.034732027	363.0841849	12.71	28.61	15.90	21.23	4.46	14943.58	0
95.81344604	272.5844421	176.7709961	221.3140547	37.39291039	156247.7226	-0.544139683	0.526852727	1.07099241	0.040440854	0.244286766	28.55124313	-0.49597168	0.787597656	1.283569336	0.243304115	0.309943557	171.7727051	1192.512817	1278.860229	86.34741211	1250.145693	21.68860425	882602.8591	0.503479719	0.717587054	0.214107335	0.616185773	0.047650365	435.0271558	2.27	31.44	29.17	16.72	8.04	11807.82	0
96.43503571	130.5080261	34.07299042	113.6716751	9.170290126	80252.20263	-0.335478038	0.440385401	0.775863439	0.009982435	0.1805774	7.047599122	-0.752197266	0.631225586	1.383422852	-0.031939196	0.294386915	-22.54907227	1071.262329	1210.351074	139.0887451	1136.854416	34.05906147	802619.218	0.387512535	0.54464376	0.157131225	0.48748575	0.025521104	344.1649398	18.05	31.87	13.82	24.67	2.78	17418.35	0
0.024648469	359.9468384	359.9221899	93.43112425	105.8964053	65868.9426	-1.056159496	0.759749532	1.815909028	0.018076543	0.40305073	12.7439626	-1.170166016	1.151062012	2.321228027	0.042897586	0.546921458	30.24279785	955.4151611	1041.401855	85.98669434	1002.227844	20.11700696	706570.6297	0.299042583	0.611818492	0.31277591	0.501138778	0.068330289	353.3028383	2.86	28.18	25.31	17.44	5.11	12292.70	0
117.6498489	344.1607971	226.5109482	176.1199993	37.89529849	123636.2395	-0.976756036	0.773131728	1.749887764	0.052583722	0.267728498	36.91377291	-1.257446289	1.421386719	2.678833008	-0.131625097	0.451351098	-92.40081787	998.6129761	1069.930664	71.31768799	1022.033624	17.7682201	717467.6038	0.223464325	0.524491608	0.301027283	0.363724641	0.070532345	255.3346983	0.64	27.31	26.67	14.06	7.22	9866.98	0
94.25242615	359.1841431	264.9317169	211.223132	63.87871417	149545.9775	-1.611756444	0.80605036	2.417806804	-0.011076439	0.355356491	-7.842119073	-2.282470703	1.153564453	3.436035156	-0.245711677	0.629425905	-173.9638672	1096.052856	1190.214355	94.16149902	1132.239569	23.99590923	801625.6146	0.316758752	0.555846632	0.23908788	0.460181414	0.039455454	325.8084415	0.70	32.29	31.59	19.76	6.58	13992.51	0
60.01130676	186.2238007	126.2124939	147.2817689	13.20816132	103980.9289	-0.184468672	0.947806358	1.13227503	0.063958388	0.160676929	45.15462199	-0.135742188	1.007324219	1.143066406	0.196598907	0.195058836	138.7988281	1214.357666	1322.432373	108.074707	1278.436996	25.33363218	902576.5194	0.416127384	0.637475252	0.221347868	0.553969178	0.040541472	391.1022398	6.47	30.76	24.29	18.55	5.13	13097.49	0
240.9547729	356.2076111	115.2528381	278.2218632	27.90396808	196702.8573	-0.646578133	1.138037086	1.784615219	0.14112839	0.279678754	99.77777176	-0.911071777	1.336669922	2.247741699	0.255280016	0.352185538	180.4829712	969.6965332	1104.516846	134.8203125	1044.989538	33.01576497	738807.6033	0.381104589	0.625817537	0.244712949	0.530326036	0.046861333	374.9405077	13.68	32.57	18.89	24.51	5.68	17329.14	0
97.57660675	172.8649445	75.28833771	146.9543057	14.27333909	103455.8312	-0.237181395	0.86833328	1.105514675	0.191648008	0.219398844	134.9201979	-1.46472168	1.946777344	3.411499023	0.164436514	0.451128578	115.7633057	982.8686523	1147.134888	164.2662354	1058.955529	39.56127438	745504.6927	0.300312102	0.535560369	0.235248268	0.45254304	0.047703797	318.5903003	20.50	36.56	16.06	27.91	3.84	19646.10	0
129.5547485	242.2966766	112.7419281	193.7841886	35.41496753	136230.2846	-0.634785354	0.210308328	0.845093682	-0.213903456	0.153492862	-150.3741293	-1.194824219	0.510253906	1.705078125	-0.34176805	0.317874562	-240.2629395	1096.750977	1193.04248	96.29150391	1142.821079	21.87232997	803403.2189	0.40525496	0.639566898	0.234311938	0.50148535	0.051364518	352.544201	9.41	28.84	19.43	19.42	5.65	13653.42	0
1.474976301	179.3404541	177.8654778	56.008244	59.06117111	39541.82026	-1.001179695	0.771989405	1.7731691	0.062603747	0.227183046	44.19824507	-1.121948242	1.212158203	2.334106445	-0.257686972	0.49811942	-181.927002	1013.271667	1105.222778	91.95111084	1039.438634	25.76752289	733843.6757	0.169689879	0.574704528	0.405014649	0.319630122	0.107607209	225.658866	1.07	36.42	35.34	18.90	11.50	13343.91	0
238.4094086	252.04599	13.63658142	247.6288734	2.804612222	175568.8712	-0.267725796	0.235814393	0.503540188	0.004185502	0.074575328	2.967520849	-0.862792969	0.778198242	1.640991211	0.05819035	0.276396309	41.25695801	1132.889648	1261.441162	128.5515137	1201.233088	35.61296172	851674.2592	0.284591347	0.719542384	0.434951037	0.517705438	0.100278222	367.0531555	12.78	29.33	16.55	24.49	3.93	17364.54	0
0.171196654	358.7173157	358.546119	181.307761	83.95802728	128365.8948	-0.779343128	1.080423832	1.85976696	0.068918208	0.345366894	48.79409114	-0.802001953	1.51550293	2.317504883	0.308852029	0.515770436	218.6672363	1088.272217	1159.905151	71.63293457	1134.747249	17.43294771	803401.0525	0.443574041	0.675792992	0.232218951	0.584389584	0.044615894	413.7478254	0.80	27.41	26.61	17.22	5.30	12190.91	0
0.692060709	359.3778076	358.6857469	151.6165748	113.8243682	106738.0686	-0.297808617	0.973532856	1.271341473	0.216134624	0.288600636	152.1587755	-0.25769043	1.324829102	1.582519531	0.456458178	0.34497727	321.3465576	934.2127686	1032.321655	98.10888672	994.7766021	24.05379811	700322.7278	0.44940713	0.669020295	0.219613165	0.562691162	0.047221027	396.1345779	0.63	33.49	32.86	21.40	6.62	15063.25	0
0.052160762	359.6833191	359.6311583	221.65428	136.690434	156931.2303	-0.568889618	1.16153419	1.730423808	0.029333087	0.313416623	20.76782555	-0.536743164	1.318847656	1.85559082	0.194905254	0.4516823	137.9929199	1187.255493	1294.405762	107.1502686	1245.792077	22.55875159	882020.7908	0.423445165	0.639439285	0.21599412	0.542165017	0.052497804	383.8528319	3.35	29.79	26.44	19.89	4.99	14084.66	0
140.0520935	186.6217194	46.56962585	157.9671305	10.15165238	111050.8927	-0.421713173	0.686468124	1.108181298	0.051715106	0.165382585	36.35571919	-0.884277344	0.809448242	1.693725586	0.041027954	0.312893033	28.84265137	1134.187866	1283.43335	149.2454834	1210.716705	35.02913318	851133.8435	0.363322079	0.580034316	0.216712236	0.484864672	0.048318268	340.8598643	17.22	33.79	16.58	24.78	3.89	17421.66	0
139.0006409	268.802948	129.8023071	206.4508414	32.54945904	144928.4907	-0.102642991	0.751976907	0.854619898	0.268404479	0.179989938	188.4199443	-0.732788086	1.148071289	1.880859375	0.301090947	0.371939971	211.3658447	877.8294067	993.3393555	115.5099487	935.9797767	29.94899205	657057.8032	0.265959442	0.61610198	0.350142539	0.468032171	0.07365719	328.5585838	9.20	30.36	21.16	22.56	3.98	15835.87	0
72.634758	264.5153198	191.8805618	114.0313854	53.79550505	80506.15812	-1.348426342	0.361306161	1.709732503	-0.013445447	0.232302593	-9.492485348	-1.755249023	0.529785156	2.28503418	-0.262337228	0.490819035	-185.210083	1029.892578	1134.272461	104.3798828	1071.100437	27.30644176	756196.9083	0.377075315	0.561480582	0.184405267	0.466814138	0.037647847	329.5707811	3.31	27.88	24.57	20.49	5.72	14462.83	0
3.282179832	353.7849121	350.5027323	299.0058764	43.45180961	210201.1311	-1.447569251	0.964765072	2.412334323	-0.031524441	0.356543728	-22.1616817	-1.943054199	1.30645752	3.249511719	-0.250053742	0.545473112	-175.7877808	866.7907104	980.805603	114.0148926	904.1353492	30.32707852	635607.1505	0.228934258	0.562350035	0.333415776	0.380228638	0.091418352	267.3007326	0.18	37.38	37.19	20.30	10.28	14271.10	0
185.621933	344.8278809	159.2059479	307.3121086	37.2611811	216962.3487	-1.245199561	0.656139851	1.901339412	0.042884546	0.322413734	30.27648963	-1.366699219	1.252929688	2.619628906	-0.12883631	0.494146468	-90.95843506	849.9177856	961.6848755	111.7670898	892.3851353	29.43688618	630023.9055	0.295725882	0.547324598	0.251598716	0.414815754	0.062356241	292.8599221	2.86	31.45	28.59	20.82	6.59	14695.48	0
0.137113541	359.6500549	359.5129414	188.3590084	135.3779818	133169.819	-1.193921328	1.042468667	2.236389995	-0.071370583	0.398256035	-50.45900236	-1.483398438	1.231445313	2.71484375	-0.217514448	0.578497486	-153.7827148	1032.039673	1114.172485	82.1328125	1070.137854	20.32732902	756587.4628	0.342628926	0.555529296	0.21290037	0.456657866	0.045321006	322.8571116	0.66	29.57	28.90	18.92	6.09	13375.04	0
105.7716675	257.5444336	151.7727661	223.2038065	26.54410977	157135.4798	-0.585114419	0.568434536	1.153548956	0.077238149	0.234938263	54.37565673	-1.085693359	0.743530273	1.829223633	0.207080147	0.2936494	145.7844238	1034.143677	1129.322021	95.17834473	1091.867403	23.91704141	768674.6516	0.433440953	0.641939938	0.208498985	0.570344139	0.039587154	401.522274	3.99	27.76	23.77	17.89	5.41	12592.33	0
1.302833557	359.8782043	358.5753708	180.661159	121.7279863	127727.4394	-1.634463668	0.597191751	2.231655419	-0.143470794	0.455402635	-101.4338511	-1.935791016	1.123779297	3.059570313	-0.232458134	0.749664946	-164.3479004	1105.955933	1192.166016	86.21008301	1153.31799	21.38578829	815395.8188	0.386748821	0.600902438	0.214153618	0.506496674	0.042715084	358.0931486	7.01	33.48	26.47	22.51	5.75	15916.92	0
0.224972486	359.7166748	359.4917023	53.24025525	57.86056223	37481.1397	-0.68853575	1.203989387	1.892525136	-0.116223345	0.311711088	-81.82123486	-0.942138672	1.343383789	2.285522461	0.01044048	0.611343212	7.350097656	1162.259521	1318.935059	156.6755371	1249.525129	42.9152325	879665.6908	0.422844529	0.678986967	0.256142437	0.545228643	0.06193598	383.8409649	5.00	37.38	32.38	27.73	7.47	19522.42	0
0.143383086	359.9419556	359.7985725	260.905142	125.8905996	184199.0303	-0.322721153	0.771971464	1.094692618	0.173703965	0.191297698	122.634999	-0.490478516	0.989013672	1.479492188	0.162994298	0.254113906	115.0739746	1135.550293	1270.244507	134.6942139	1198.485813	30.83694977	846130.9839	0.384645015	0.588941216	0.204296201	0.482564675	0.039169272	340.6906607	16.29	28.79	12.50	23.15	2.66	16344.94	0
316.4622803	336.47052	20.00823975	327.029423	4.502789527	230228.7138	-0.238069758	0.358831108	0.596900865	0.013763025	0.104414526	9.689169842	-0.773193359	0.459594727	1.232788086	-0.034910722	0.194428463	-24.57714844	1032.277832	1175.515015	143.2371826	1101.564151	36.99239021	775501.1625	0.424840063	0.531138241	0.106298178	0.478721862	0.017792504	337.0201907	18.77	30.53	11.75	26.44	2.07	18613.59	0
165.1370697	335.1943665	170.0572968	270.3004346	71.74129801	190561.8064	-1.049162745	0.301125348	1.350288093	-0.090521192	0.193075346	-63.81744053	-1.992431641	0.434814453	2.427246094	-0.44697508	0.351194753	-315.1174316	969.0007324	1052.567261	83.56652832	999.6936897	19.0889177	704784.0513	0.321825415	0.52841717	0.206591755	0.404097345	0.048002464	284.8886284	1.84	32.70	30.86	20.40	8.06	14384.06	0
1.309951186	357.5817566	356.2718054	86.98848678	51.93565702	61239.8947	-0.400215238	0.228935659	0.629150897	0.006390497	0.059022435	4.498909933	-0.648254395	0.64654541	1.294799805	-0.025012016	0.171323913	-17.60845947	876.3414307	895.4534302	19.11199951	883.9351037	3.727949752	622290.313	0.243333578	0.761325896	0.517992318	0.505986154	0.131038391	356.2142524	0.12	7.10	6.98	3.19	1.97	2243.22	0
1.341339707	358.4980774	357.1567377	165.2448467	80.49234322	116662.8618	-1.106646061	0.551705003	1.658351064	0.060315536	0.153718851	42.58276821	-2.013305664	1.180297852	3.193603516	-0.287321183	0.614986268	-202.8487549	1073.723267	1175.886108	102.1628418	1105.757437	29.22341636	780664.7506	0.230716124	0.549876392	0.319160268	0.379072571	0.08938657	267.6252348	0.43	35.33	34.91	21.36	9.73	15077.96	0
0.027045617	359.9075317	359.8804861	218.3833758	147.4326259	153305.1298	-0.848164678	0.125966936	0.974131614	-0.258818882	0.188365985	-181.6908549	-1.458740234	0.509216309	1.967956543	-0.343885634	0.331916207	-241.4077148	961.5031738	1089.519897	128.0167236	1031.470258	30.81152165	724092.121	0.428648233	0.631845117	0.203196883	0.519292398	0.042285107	364.5432633	16.54	32.91	16.38	24.40	3.20	17128.87	0
0.276960611	359.8618164	359.5848558	294.4082303	73.06579408	208146.6188	-0.449319124	1.293895245	1.743214369	0.067998142	0.430524032	48.07468609	-0.858398438	2.006835938	2.865234375	0.205765828	0.726970767	145.4764404	1111.06189	1211.182251	100.1203613	1168.667446	28.1537184	826247.8842	0.357435167	0.59078896	0.233353794	0.484435709	0.045333956	342.4960465	1.87	30.71	28.84	21.56	5.84	15243.91	0
122.8066406	311.7682495	188.9616089	168.9399607	56.17760266	119102.6723	-0.853928149	0.490666896	1.344595045	-0.088179429	0.218400876	-62.16649745	-1.147705078	0.637023926	1.784729004	-0.236441105	0.383129182	-166.690979	1001.279846	1069.741333	68.46148682	1031.095075	18.51139405	726922.028	0.369636863	0.574695647	0.205058783	0.470172663	0.048148154	331.4717277	2.90	20.86	17.96	14.87	4.27	10485.46	0
20.8354187	162.0948334	141.2594147	54.03461707	31.49757362	38256.50889	-0.314657331	1.062499881	1.377157211	0.276227527	0.255104365	195.5690893	-0.840820313	1.465454102	2.306274414	0.361130537	0.408374368	255.6804199	1035.7052	1173.194702	137.489502	1105.022338	36.01925601	782355.8154	0.391360372	0.564769924	0.173409551	0.487116569	0.040097348	344.8785311	8.79	31.34	22.55	26.60	4.02	18829.64	0
2.901909828	325.1003113	322.1984015	66.29594289	19.01432489	46738.63974	-0.144556999	0.104037113	0.248594113	-0.003903972	0.030128047	-2.752300447	-0.619140625	0.290344238	0.909484863	-0.130798167	0.180479304	-92.21270752	802.2543335	836.2702026	34.01586914	808.7779312	8.754270974	570188.4415	0.07975436	0.484500468	0.404746108	0.26401418	0.101351183	186.1299966	0.03	20.79	20.76	6.17	6.24	4347.88	0
288.9952087	332.7799377	43.784729	308.9103767	9.318259818	217472.9052	-0.343382031	0.158460662	0.501842692	-0.086938092	0.107154529	-61.20441666	-0.745239258	0.351806641	1.097045898	-0.24405254	0.195900528	-171.8129883	1210.593262	1359.171265	148.5780029	1271.880067	37.55568755	895403.5671	0.380253971	0.592401206	0.212147236	0.460951623	0.050527778	324.5099423	16.33	38.06	21.72	26.47	7.04	18634.96	0
1.075616717	359.4212646	358.3456479	251.359189	70.94122961	177459.5875	-0.397134155	0.894762874	1.291897029	-0.006159192	0.267625796	-4.348389614	-0.862182617	1.00012207	1.862304688	0.081149093	0.369441059	57.29125977	1103.109009	1220.699707	117.5906982	1167.779773	27.6741943	824452.5197	0.441050023	0.672116458	0.231066436	0.548214752	0.04193446	387.0396149	0.96	30.98	30.03	20.39	5.97	14393.42	0
0.041931152	359.8108521	359.7689209	143.7348245	145.8029304	101907.9906	-0.390412152	0.375081092	0.765493244	0.010201292	0.074142208	7.232715884	-0.879150391	0.473693848	1.352844238	-0.085277649	0.187903615	-60.46185303	875.699646	903.7092896	28.00964355	880.8403999	5.925015599	624515.8435	0.112529375	0.605585515	0.493056141	0.260733408	0.102229803	184.8599863	0.06	22.48	22.43	4.37	4.85	3098.22	0
[truncated: 878 more rows]
